# Supplementary material for: T3_MM: A Markov Model Effectively Classifies Bacterial Type III Secretion Signals
Source: PLoS One. 2013 Mar 5;8(3):e58173. doi: 10.1371/journal.pone.0058173 (PMC3589343; doi:10.1371/journal.pone.0058173)
Supplement: Table S3 — T3_MM predicted Salmonella effectors. (XLS) [file pone.0058173.s005.xls]

## Sheet: SL1344
Protein	Score	T3S protein or Not	Probability
SL4158__+_4463546-4463788	0.614327	YES	0.950366
SL2863__-_3050433-3051662	0.594716	YES	0.943456
SL0001__+_169-255	0.539061	YES	0.920186
SL2862__-_3049331-3050362	0.53127	YES	0.916485
SL2904__-_3089110-3090243	0.526703	YES	0.914266
SL4249__-_4580940-4581155	0.521592	YES	0.911736
SL1415__-_1518912-1519196	0.520838	YES	0.91136
SL1364__-_1466973-1467827	0.517061	YES	0.909455
SL0776__+_866199-868496	0.509871	YES	0.90576
SL2043__+_2139285-2141633	0.484806	YES	0.892157
SL1889__+_2006970-2008373	0.457064	YES	0.875833
SL2876__-_3063058-3064176	0.456177	YES	0.875289
SL1059__+_1162526-1162693	0.454579	YES	0.874308
SL1331__+_1440510-1440779	0.454474	YES	0.874243
SL4126__+_4436046-4436147	0.415162	YES	0.848814
SL4239__-_4569886-4570152	0.398274	YES	0.837193
SL1334__+_1441849-1443303	0.397951	YES	0.836967
SL1253__-_1353967-1356219	0.389105	YES	0.830723
SL1888__-_2005226-2006713	0.385139	YES	0.827892
SL2756__-_2935806-2937326	0.385139	YES	0.827892
SL1784__-_1909580-1910302	0.365003	YES	0.813228
SL0736__-_822322-822537	0.362094	YES	0.811072
SL0802__-_891662-893884	0.353604	YES	0.804729
SL0645__+_719757-719900	0.337325	YES	0.792372
SL1878__+_1996935-1997159	0.33549	YES	0.790964
SL1443__+_1548928-1549110	0.320171	YES	0.779104
SL4197__+_4503766-4520445	0.315968	YES	0.775819
SL2858__-_3044647-3046278	0.308275	YES	0.769776
SL2884__+_3069908-3070198	0.298868	YES	0.762336
SL1113__+_1215225-1215923	0.298602	YES	0.762125
SL2710__+_2888594-2889730	0.281629	YES	0.748579
SL1659__+_1782411-1782593	0.278743	YES	0.746263
SL3091__-_3297083-3297517	0.275062	YES	0.743303
SL2018__+_2118037-2118558	0.274396	YES	0.742767
SL1109__-_1213188-1213481	0.274174	YES	0.742588
SL0995__-_1098888-1099574	0.27128	YES	0.740257
SL2674__+_2863004-2863726	0.270975	YES	0.740012
SL1340__+_1446389-1446604	0.266932	YES	0.736749
SL2209__-_2331729-2332172	0.265976	YES	0.735978
SL1767__-_1893337-1893480	0.258384	YES	0.729836
SL2379__+_2527069-2527431	0.256601	YES	0.728392
SL4473__-_4822856-4823317	0.248011	YES	0.721422
SL2479__-_2646325-2648517	0.243078	YES	0.717412
SL1979__+_2082173-2082646	0.238523	YES	0.713707
SL4248__-_4580663-4580932	0.238424	YES	0.713626
SL2204__+_2326377-2326604	0.23212	YES	0.708492
SL1982__+_2084162-2086330	0.232057	YES	0.708442
SL1082__+_1188287-1188613	0.231344	YES	0.707861
SL0245__-_284991-285395	0.230639	YES	0.707286
SL4383__+_4715479-4715649	0.225439	YES	0.703048
SL0964__-_1069692-1070141	0.221619	YES	0.699934
SL3421__+_3627391-3627609	0.218211	YES	0.697154
SL4169__+_4474892-4475809	0.215813	YES	0.695198
SL4055__+_4339966-4340856	0.214988	YES	0.694525
SL0210__+_244488-245915	0.2134	YES	0.69323
SL0573__-_641046-643301	0.211162	YES	0.691404
SL0248__-_287014-288045	0.210115	YES	0.69055
SL0763__-_849574-850857	0.206995	YES	0.688004
SL2558__-_2740873-2743968	0.206187	YES	0.687345
SL3950__+_4231905-4232420	0.204663	YES	0.686102
SL2879__+_3066965-3067408	0.201033	YES	0.683141
SL2128__-_2244074-2244757	0.199661	YES	0.682022
SL2861__-_3047255-3049312	0.199303	YES	0.68173
SL4295__+_4625156-4625464	0.199238	YES	0.681677
SL3686__-_3936997-3937230	0.199095	YES	0.68156
SL4195__+_4501156-4502475	0.198125	YES	0.680769
SL0532__-_600873-601310	0.197462	YES	0.680229
SL0285__+_332062-332508	0.196758	YES	0.679654
SL3332__+_3549448-3549918	0.193369	YES	0.676891
SL2745__+_2924046-2925920	0.192385	YES	0.676088
SL0032__-_34376-34816	0.191845	YES	0.675648
SL4067__+_4354654-4354725	0.187982	YES	0.672499
SL2924__+_3109160-3110113	0.187041	YES	0.671733
SL0153__+_178922-180811	0.184719	YES	0.669841
SL3129__+_3338358-3338768	0.183743	YES	0.669046
SL4069__-_4356691-4359342	0.183564	YES	0.668899
SL1310__-_1415909-1416148	0.183156	YES	0.668567
SL0732__+_817236-818024	0.182859	YES	0.668326
SL1789__+_1913799-1913939	0.181728	YES	0.667404
SL0284__+_329849-332038	0.17819	YES	0.664523
SL0972__+_1077233-1079314	0.177661	YES	0.664092
SL3988__+_4271801-4272859	0.176921	YES	0.66349
SL1946__-_2055070-2055270	0.176262	YES	0.662953
SL1121__+_1223286-1224239	0.176021	YES	0.662756
SL1559__+_1676474-1676875	0.175728	YES	0.662519
SL3900__+_4173567-4173770	0.173397	YES	0.660621
SL1550__-_1664695-1665897	0.17265	YES	0.660013
SL3987__-_4270545-4271576	0.172621	YES	0.659989
SL3212__-_3425703-3427067	0.170704	YES	0.65843
SL0343__+_391194-391418	0.170438	YES	0.658213
SL2219__-_2341636-2342427	0.169186	YES	0.657195
SL4037__+_4318553-4318792	0.168468	YES	0.656611
SL3445__+_3650653-3656547	0.167926	YES	0.656171
SL1629__+_1748418-1748597	0.167708	YES	0.655993
SL2855__+_3040412-3041341	0.166564	YES	0.655063
SL0963__+_1069431-1069556	0.162431	YES	0.651703
SL1801__-_1922080-1922343	0.161885	YES	0.651259
SL0989__+_1095236-1095817	0.158745	YES	0.648708
SL2708__+_2886920-2887495	0.155448	YES	0.646031
SL0509__+_576052-576870	0.154857	YES	0.645552
SL2113__+_2229212-2230258	0.154184	YES	0.645005
SL1430__-_1536401-1536709	0.154027	YES	0.644877
SL2898__+_3084385-3085149	0.150215	YES	0.641784
SL1551__-_1665909-1666484	0.148848	YES	0.640675
SL1243__+_1345410-1345895	0.143038	YES	0.635964
SL3396__-_3612196-3612510	0.141792	YES	0.634954
SL1899__+_2015782-2016777	0.141547	YES	0.634756
SL2256__+_2392511-2393464	0.141526	YES	0.634739
SL3399__-_3613310-3613501	0.139552	YES	0.633139
SL1822__+_1940045-1941487	0.139023	YES	0.632711
SL4524__-_4875369-4875683	0.136244	YES	0.63046
SL1335__+_1443319-1443906	0.134662	YES	0.629178
SL3853__+_4117855-4118853	0.134535	YES	0.629075
SL0705__+_787521-788231	0.134372	YES	0.628943
SL2546__+_2726717-2728186	0.13413	YES	0.628747
SL4198__+_4520485-4522551	0.133529	YES	0.628261
SL2486__-_2655117-2656121	0.132644	YES	0.627544
SL0987__+_1089344-1092694	0.132608	YES	0.627515
SL1342__+_1446884-1447132	0.132028	YES	0.627046
SL2166__-_2282680-2284200	0.13156	YES	0.626667
SL2307__+_2446934-2449078	0.131493	YES	0.626613
SL3439__-_3642705-3643277	0.131181	YES	0.626361
SL3201__+_3417093-3417461	0.128863	YES	0.624484
SL3112__-_3321322-3322380	0.127563	YES	0.623433
SL2550__-_2731024-2731602	0.127536	YES	0.623411
SL1030__-_1134553-1136238	0.125834	YES	0.622034
SL1022__+_1129068-1129847	0.125012	YES	0.621369
SL1183__-_1288029-1288292	0.123904	YES	0.620473
SL0349__+_400346-400810	0.123578	YES	0.620209
SL0163__+_191146-192417	0.123167	YES	0.619877
SL4342__+_4666633-4668366	0.122368	YES	0.619231
SL3860__-_4128408-4129928	0.122233	YES	0.619122
SL2067__-_2168641-2169954	0.12179	YES	0.618764
SL1518__+_1630763-1632883	0.120771	YES	0.61794
SL0956__+_1065290-1065580	0.120473	YES	0.617698
SL4232__-_4558930-4559691	0.11959	YES	0.616984
SL1828__-_1946622-1947551	0.119549	YES	0.616952
SL3077__+_3282933-3283223	0.118951	YES	0.616468
SL0011__-_10841-11245	0.117392	YES	0.615208
SL3583__-_3819856-3822156	0.117059	YES	0.614938
SL1967__+_2072244-2072939	0.116617	YES	0.614582
SL0322__+_370217-370540	0.11485	YES	0.613153
SL1961__-_2066509-2067414	0.114505	YES	0.612875
SL3036__+_3242447-3242776	0.114155	YES	0.612592
SL2801__-_2987130-2988500	0.113992	YES	0.61246
SL1798__+_1920177-1920440	0.11305	YES	0.611699
SL1120__+_1221610-1223271	0.112803	YES	0.611499
SL2064__-_2165334-2166335	0.112371	YES	0.61115
SL2593__+_2768366-2768833	0.111836	YES	0.610718
SL3346__-_3564936-3565979	0.111795	YES	0.610685
SL0604__-_678832-679242	0.111519	YES	0.610461
SL0022__+_25112-25798	0.111241	YES	0.610237
SL2196__+_2317871-2319460	0.110522	YES	0.609656
SL4267__+_4595692-4597338	0.110255	YES	0.60944
SL1989__+_2091704-2091871	0.110137	YES	0.609345
SL3605__-_3847981-3848679	0.110052	YES	0.609277
SL1346__+_1449081-1450097	0.109094	YES	0.608502
SL3749__-_4004977-4005264	0.108608	YES	0.60811
SL3388__-_3608848-3609282	0.108214	YES	0.607792
SL2146__-_2263241-2264149	0.108151	YES	0.60774
SL3867__+_4137527-4137868	0.10782	YES	0.607473
SL1032__-_1136741-1136851	0.107358	YES	0.6071
SL1271__+_1372531-1373514	0.106025	YES	0.606023
SL1116__+_1217951-1218733	0.105722	YES	0.605778
SL1181__-_1286749-1287270	0.104953	YES	0.605157
SL0143__-_166323-167708	0.104114	YES	0.604479
SL3292__+_3505827-3507260	0.103196	YES	0.603738
SL2654__-_2832775-2833365	0.102033	YES	0.602798
SL2624__+_2808081-2808419	0.101889	YES	0.602682
SL2713__-_2891273-2892970	0.101643	YES	0.602484
SL1805__+_1923923-1924576	0.10009	YES	0.601229
SL0344__+_391476-391835	0.0990518	YES	0.60039
SL0157__-_183850-184482	0.0989245	YES	0.600288
SL3413__-_3621040-3623154	0.0979528	YES	0.599503
SL3014__-_3218295-3219053	0.0969844	YES	0.598721
SL3482__+_3698422-3701127	0.0966448	YES	0.598446
SL1928__+_2040503-2041510	0.0966391	YES	0.598442
SL1338__+_1444827-1445609	0.0966171	YES	0.598424
SL4031__-_4312583-4313179	0.0965451	YES	0.598366
SL0553__+_621298-621534	0.095853	YES	0.597807
SL0295__+_341687-342199	0.0958399	YES	0.597796
SL3862__+_4132164-4132424	0.0956179	YES	0.597617
SL2715__-_2893177-2893725	0.0940424	YES	0.596344
SL1585__+_1704162-1705097	0.0923509	YES	0.594978
SL4009__+_4292033-4292533	0.0908811	YES	0.593791
SL0135__+_158203-158631	0.0908768	YES	0.593787
SL1600__-_1720110-1720955	0.0900791	YES	0.593143
SL1601__-_1720110-1720955	0.0900791	YES	0.593143
SL1263__-_1363971-1364930	0.089073	YES	0.59233
SL3143__+_3352301-3353284	0.0889865	YES	0.59226
SL0192__+_223735-225924	0.0887688	YES	0.592084
SL3683__-_3933801-3934811	0.0886596	YES	0.591996
SL2691__-_2872346-2873428	0.0879772	YES	0.591445
SL3638__+_3881288-3882274	0.0879585	YES	0.59143
SL1790__-_1914422-1915279	0.0872862	YES	0.590887
SL1854__-_1972323-1973984	0.0872802	YES	0.590882
SL2340__+_2481311-2482312	0.0865318	YES	0.590277
SL4127__+_4436182-4436721	0.0852718	YES	0.589259
SL4521__-_4872675-4873358	0.0852628	YES	0.589252
SL1265__+_1365402-1366238	0.0848861	YES	0.588947
SL3185__+_3397106-3398953	0.0848038	YES	0.588881
SL4526__+_4876762-4876902	0.0843546	YES	0.588518
SL0277__+_321087-322391	0.0843282	YES	0.588496
SL0276__+_319747-321090	0.0838242	YES	0.588089
SL4088__+_4384436-4384864	0.0836494	YES	0.587948
SL4520__-_4870092-4872629	0.083403	YES	0.587749
SL0318__+_366908-368158	0.0832687	YES	0.58764
SL4311__-_4641861-4642181	0.0827299	YES	0.587205
SL1345__+_1448441-1449115	0.0826065	YES	0.587105
SL2779__-_2967727-2968176	0.0820202	YES	0.586631
SL3645__-_3889288-3890826	0.0814204	YES	0.586146
SL4350__+_4679122-4679955	0.0807985	YES	0.585644
SL0544__-_611721-612032	0.0807832	YES	0.585631
SL2438__-_2583279-2583509	0.0800078	YES	0.585005
SL2547__+_2729043-2729588	0.0794304	YES	0.584538
SL1038__-_1142048-1143610	0.0788536	YES	0.584071
SL0594__-_667531-668433	0.0787005	YES	0.583948
SL1280__-_1381903-1382094	0.0780267	YES	0.583403
SL4379__+_4712031-4712273	0.0777872	YES	0.583209
SL1219__-_1317272-1318558	0.0777859	YES	0.583208
SL1052__+_1156476-1156838	0.0777434	YES	0.583174
SL2553__-_2735120-2738482	0.075812	YES	0.581612
SL3606__-_3848764-3849300	0.0754177	YES	0.581293
SL0799__-_889717-889977	0.0751741	YES	0.581096
SL0033__+_35339-37057	0.0746052	YES	0.580636
SL3744__+_4000450-4000773	0.0744456	YES	0.580507
SL1421__-_1525377-1526525	0.07435	YES	0.580429
SL4386__-_4718940-4719887	0.0740489	YES	0.580186
SL4109__+_4408040-4408312	0.0738413	YES	0.580018
SL4251__-_4581462-4582337	0.0734434	YES	0.579696
SL1114__+_1215950-1217161	0.0732947	YES	0.579576
SL1339__+_1445606-1446295	0.072642	YES	0.579048
SL1802__+_1922651-1922818	0.0719782	YES	0.57851
SL0269__+_315998-316156	0.0706396	YES	0.577427
SL3602__-_3844343-3844900	0.0702101	YES	0.577079
SL3601__-_3843810-3844337	0.0701682	YES	0.577046
SL3821__-_4082051-4082824	0.0694882	YES	0.576495
SL1561__+_1678146-1679372	0.0685063	YES	0.5757
SL2312__-_2454050-2454322	0.0684583	YES	0.575661
SL0538__+_604813-605505	0.0683458	YES	0.57557
SL1202__-_1306147-1306395	0.0681253	YES	0.575392
SL0220__+_257144-257701	0.0677049	YES	0.575051
SL0017__-_17043-17486	0.0672242	YES	0.574662
SL3045__-_3251412-3252575	0.0665392	YES	0.574107
SL0708__+_791187-793082	0.0650356	YES	0.572889
SL0004__+_3734-5020	0.0646997	YES	0.572617
SL1311__-_1416231-1416467	0.0646829	YES	0.572604
SL0387__-_442415-443326	0.0644054	YES	0.572379
SL1151__+_1253570-1253827	0.0643121	YES	0.572303
SL3604__-_3845430-3847958	0.0638533	YES	0.571931
SL0835__-_931284-932174	0.0637742	YES	0.571867
SL1645__-_1765260-1766234	0.0636426	YES	0.571761
SL2668__-_2857482-2860289	0.0628451	YES	0.571114
SL3801__+_4059254-4060150	0.0627001	YES	0.570997
SL0888__-_984216-984893	0.0622003	YES	0.570592
SL2887__-_3072175-3072696	0.0613892	YES	0.569934
SL0777__-_868588-869496	0.060883	YES	0.569524
SL3746__-_4001143-4002003	0.0602857	YES	0.569039
SL0274__+_318655-319140	0.0598515	YES	0.568687
SL1028__+_1133859-1134185	0.0594536	YES	0.568364
SL0002__+_337-2799	0.0594316	YES	0.568347
SL0251__-_295884-296798	0.0592545	YES	0.568203
SL0044__-_52280-52543	0.058684	YES	0.56774
SL2612__-_2787826-2788863	0.0586802	YES	0.567737
SL2578__-_2759753-2760316	0.0585012	YES	0.567592
SL0968__+_1072934-1073467	0.0583308	YES	0.567454
SL1677__-_1796461-1798092	0.058163	YES	0.567317
SL4480__-_4828111-4828569	0.0574984	YES	0.566778
SL0625__-_697889-699100	0.0573196	YES	0.566633
SL1105__+_1209268-1209915	0.056769	YES	0.566186
SL3891__-_4164666-4165835	0.0567357	YES	0.566159
SL1087__+_1192559-1194094	0.0565983	YES	0.566048
SL4498__-_4846478-4847050	0.0555731	YES	0.565215
SL0664__-_741103-742323	0.0533771	YES	0.563432
SL0039__+_44312-46027	0.0532451	YES	0.563325
SL4489__+_4836462-4837079	0.05288	YES	0.563028
SL2527__-_2705971-2709858	0.052244	YES	0.562512
SL3012__-_3216274-3216501	0.0520815	YES	0.562379
SL0254__+_299088-299858	0.0514709	YES	0.561883
SL2701__-_2881397-2883640	0.0513094	YES	0.561752
SL0536__+_603618-604160	0.0509657	YES	0.561473
SL0158__-_184607-185464	0.0508143	YES	0.56135
SL4335__+_4659696-4660082	0.0498173	YES	0.560539
SL2854__-_3038918-3040096	0.049141	YES	0.559989
SL0510__+_576955-578736	0.0487894	YES	0.559703
SL2934__+_3123527-3123631	0.0479455	YES	0.559016
SL1964__-_2069149-2069967	0.0478657	YES	0.558951
SL1115__+_1217182-1217937	0.0460762	YES	0.557495
SL0300__+_348088-349035	0.0456167	YES	0.557121
SL4137__-_4444106-4445221	0.0446815	YES	0.556359
SL4273__+_4601060-4601206	0.0439215	YES	0.55574
SL2607__+_2783316-2784650	0.0439178	YES	0.555737
SL2474__-_2625306-2631425	0.0435195	YES	0.555413
SL1598__-_1717202-1718032	0.0430878	YES	0.555061
SL0025__+_29433-29978	0.0427243	YES	0.554765
SL1076__-_1184165-1184911	0.0424071	YES	0.554506
SL2182__-_2303002-2303859	0.0424008	YES	0.554501
SL1305__+_1411048-1411794	0.0422462	YES	0.554375
SL2762__-_2946165-2948345	0.0422336	YES	0.554365
SL0271__+_316869-317354	0.040946	YES	0.553315
SL4361__-_4692997-4694934	0.0409042	YES	0.553281
SL0134__+_156938-157855	0.0408975	YES	0.553275
SL3726__+_3981153-3981833	0.0402224	YES	0.552724
SL2571__-_2753087-2753290	0.0401692	YES	0.552681
SL2695__-_2877245-2878222	0.0401395	YES	0.552657
SL0196__+_230653-231213	0.0399241	YES	0.552481
SL3569__-_3798561-3800150	0.0398328	YES	0.552407
SL2662__+_2850307-2851716	0.0396716	YES	0.552275
SL0083__-_94774-95064	0.0395087	YES	0.552142
SL0234__+_274178-275941	0.0387515	YES	0.551524
SL3285__-_3500363-3501175	0.0383964	YES	0.551234
SL0459__+_522843-523412	0.037732	YES	0.550692
SL0335__-_383887-384423	0.0375954	YES	0.55058
SL2301__+_2441019-2441618	0.03759	YES	0.550576
SL1119__+_1220595-1221545	0.0375101	YES	0.550511
SL0900__+_998757-1000100	0.0374143	YES	0.550432
SL0263__-_308613-309107	0.0373477	YES	0.550378
SL1969__+_2074183-2075010	0.0364243	YES	0.549624
SL4096__+_4396681-4397691	0.0363622	YES	0.549573
SL1630__+_1748572-1748871	0.0361959	YES	0.549437
SL0253__+_298231-299010	0.0357699	YES	0.549089
SL0832__+_926740-927687	0.0353354	YES	0.548734
SL1608__+_1727825-1728754	0.0350361	YES	0.548489
SL2941__-_3132002-3133342	0.0345998	YES	0.548133
SL0353__+_404782-407757	0.0345747	YES	0.548112
SL2620__-_2802529-2805102	0.0337673	YES	0.547452
SL3352__+_3571515-3571985	0.0335815	YES	0.5473
SL3490__-_3708195-3708527	0.0334105	YES	0.54716
SL4117__+_4422130-4423059	0.031864	YES	0.545895
SL2049__+_2148332-2149636	0.0314386	YES	0.545546
SL1519__-_1632950-1633615	0.0313891	YES	0.545506
SL1094__-_1201001-1201576	0.0302591	YES	0.544581
SL3320__+_3536834-3538201	0.029984	YES	0.544355
SL1021__+_1128494-1129042	0.0294458	YES	0.543914
SL1362__-_1464772-1465797	0.029379	YES	0.543859
SL4391__-_4724553-4725488	0.0292443	YES	0.543749
SL0446__+_508154-510025	0.0290049	YES	0.543553
SL3876__+_4147129-4148388	0.0285582	YES	0.543187
SL3560__-_3787489-3788760	0.0283345	YES	0.543003
SL2871__-_3057822-3058832	0.028066	YES	0.542783
SL2394__+_2542302-2542559	0.027664	YES	0.542454
SL0679__+_758602-759144	0.0271149	YES	0.542003
SL3792__+_4047765-4050500	0.0263016	YES	0.541336
SL3622__-_3864214-3864516	0.0261315	YES	0.541197
SL2468__+_2618927-2619118	0.0243712	YES	0.539751
SL0226__+_264912-265397	0.024163	YES	0.53958
SL2298__-_2437609-2437761	0.0240547	YES	0.539491
SL3536__-_3760068-3761543	0.0226448	YES	0.538333
SL2964__+_3157418-3158623	0.0212654	YES	0.537198
SL3815__+_4076544-4077503	0.0211476	YES	0.537101
SL3402__-_3614643-3614975	0.0210981	YES	0.537061
SL4369__+_4703860-4704246	0.0208668	YES	0.53687
SL0255__-_299914-301281	0.0208268	YES	0.536838
SL3655__+_3901816-3902499	0.0201316	YES	0.536265
SL2399__+_2546219-2547511	0.0198497	YES	0.536033
SL2115__-_2230832-2231167	0.0189435	YES	0.535287
SL3473__+_3685658-3687976	0.0188824	YES	0.535237
SL3044__-_3250231-3251310	0.0188011	YES	0.53517
SL2473__+_2623795-2625144	0.0187019	YES	0.535088
SL3513__+_3737959-3738906	0.0185084	YES	0.534929
SL1586__-_1705141-1706514	0.0179278	YES	0.53445
SL1083__+_1188744-1189064	0.0179123	YES	0.534438
SL3974__+_4259649-4260086	0.0173327	YES	0.53396
SL2335__-_2476406-2477320	0.0165989	YES	0.533355
SL2848__-_3035915-3036367	0.0164811	YES	0.533258
SL4184__+_4490595-4491788	0.0151145	YES	0.53213
SL4499__-_4847047-4849455	0.0148169	YES	0.531885
SL4300__+_4631181-4631606	0.0145647	YES	0.531677
SL3873__-_4143372-4144853	0.0142933	YES	0.531452
SL1433__-_1538160-1538501	0.0138307	YES	0.53107
SL1332__+_1440786-1441376	0.0134693	YES	0.530772
SL0897__+_993279-993773	0.0132499	YES	0.530591
SL1785__+_1910986-1911381	0.0131897	YES	0.530541
SL1495__+_1602344-1602487	0.0126268	YES	0.530076
SL4522__-_4873429-4873974	0.011005	YES	0.528735
SL3239__+_3456449-3457039	0.00987328	YES	0.527798
SL0461__-_524065-525615	0.00933912	YES	0.527356
SL4268__+_4597564-4597935	0.00916869	YES	0.527215
SL1809__-_1927110-1927490	0.00911379	YES	0.527169
SL3865__+_4135385-4136929	0.00829337	YES	0.52649
SL3632__-_3875924-3876724	0.00806075	YES	0.526297
SL1660__+_1782683-1783186	0.00784943	YES	0.526122
SL1044__+_1148681-1149484	0.00781171	YES	0.526091
SL0279__+_323372-323803	0.00701185	YES	0.525427
SL3587__+_3825989-3827560	0.00680161	YES	0.525253
SL2023__+_2121520-2122152	0.00674181	YES	0.525203
SL2026__+_2122929-2123939	0.00641835	YES	0.524935
SL4437__+_4781635-4782408	0.00589452	YES	0.524501
SL3689__-_3939173-3940207	0.00564871	YES	0.524297
SL1385__-_1485409-1486044	0.00515307	YES	0.523885
SL2707__-_2886495-2886743	0.00500331	YES	0.523761
SL2090__-_2193982-2195199	0.00443758	YES	0.523291
SL4451__-_4796506-4796649	0.004437	YES	0.523291
SL4192__+_4497578-4498108	0.00441438	YES	0.523272
SL2130__-_2245622-2245903	0.00440197	YES	0.523261
SL0568__-_637634-638215	0.0043861	YES	0.523248
SL4284__-_4609814-4613116	0.00403452	YES	0.522956
SL3702__-_3949748-3950605	0.00340419	YES	0.522432
SL1031__+_1136570-1136740	0.00340354	YES	0.522432
SL3333__+_3550283-3550546	0.00332656	YES	0.522368
SL1041__+_1145829-1147295	0.00332156	YES	0.522364
SL2464__+_2612653-2614719	0.00276845	YES	0.521904
SL0332__-_379183-380508	0.00253052	YES	0.521706
SL3809__+_4067739-4069385	0.00195647	YES	0.521229
SL0209__+_242841-244358	0.00162689	YES	0.520954
SL0165__+_193400-194167	0.0015802	YES	0.520916
SL0595__-_668750-669496	0.00133998	YES	0.520716
SL4023__+_4304939-4306474	0.00113538	YES	0.520545
SL0203__-_237207-238487	0.00102043	YES	0.52045
SL2704__-_2885007-2885348	0.000873512	YES	0.520327
SL3272__+_3490070-3491503	0.000623443	YES	0.520119
SL3805__-_4064938-4066338	0.000548708	YES	0.520057
SL2093__-_2196616-2198775	1.92855e-05	YES	0.519616

## Sheet: 14028s
Protein	Score	T3S protein or Not	Probability
STM14_0001_ACY86538.1_+_190-255	0.445866	YES	0.868881
STM14_0002_ACY86539.1_+_337-2799	0.0590027	YES	0.567999
STM14_0004_ACY86541.1_+_3734-5020	0.0158782	YES	0.532761
STM14_0011_ACY86548.1_-_10841-11245	0.182479	YES	0.668016
STM14_0019_ACY86556.1_-_17043-17486	0.0880499	YES	0.591504
STM14_0020_ACY86557.1_-_17613-17741	0.0581626	YES	0.567317
STM14_0023_ACY86560.1_+_20058-23054	0.0217777	YES	0.53762
STM14_0032_ACY86569.1_+_29433-29978	0.0737766	YES	0.579966
STM14_0035_ACY86572.1_+_31274-32119	0.0092188	YES	0.527256
STM14_0039_ACY86576.1_-_34376-34816	0.141464	YES	0.634688
STM14_0041_ACY86578.1_+_35339-37057	0.136383	YES	0.630572
STM14_0047_ACY86584.1_+_44312-46027	0.0481309	YES	0.559167
STM14_0052_ACY86589.1_-_52280-52543	0.184337	YES	0.669529
STM14_0086_ACY86623.1_-_86109-86246	0.159952	YES	0.649689
STM14_0098_ACY86635.1_-_95483-95773	0.0170715	YES	0.533745
STM14_0105_ACY86642.1_-_101349-101474	0.0673162	YES	0.574737
STM14_0112_ACY86649.1_-_106522-108882	0.0118464	YES	0.529431
STM14_0118_ACY86655.1_-_116189-116941	0.0253718	YES	0.540573
STM14_0132_ACY86669.1_-_130385-131785	0.0312346	YES	0.545379
STM14_0134_ACY86671.1_-_132879-134450	0.0134281	YES	0.530738
STM14_0141_ACY86678.1_-_138755-138877	0.142066	YES	0.635176
STM14_0143_ACY86680.1_-_140204-140338	0.0864136	YES	0.590181
STM14_0160_ACY86697.1_+_157647-158564	0.0645052	YES	0.57246
STM14_0171_ACY86707.1_-_167032-168417	0.0966567	YES	0.598456
STM14_0184_ACY86720.1_+_179631-181520	0.219195	YES	0.697957
STM14_0191_ACY86726.1_-_189220-190062	0.0213607	YES	0.537277
STM14_0194_ACY86729.1_+_191855-193126	0.150031	YES	0.641635
STM14_0196_ACY86731.1_+_194109-194876	0.0130269	YES	0.530406
STM14_0197_ACY86732.1_-_194906-195700	0.045035	YES	0.556647
STM14_0208_ACY86743.1_-_208357-209040	0.203613	YES	0.685246
STM14_0217_ACY86752.1_-_214102-214581	0.0186876	YES	0.535076
STM14_0225_ACY86760.1_-_221522-221629	0.12697	YES	0.622953
STM14_0228_ACY86763.1_+_224443-226632	0.150935	YES	0.642369
STM14_0234_ACY86769.1_+_231361-231921	0.0557482	YES	0.565358
STM14_0238_ACY86773.1_+_235962-236438	0.0220581	YES	0.53785
STM14_0241_ACY86776.1_-_237915-239195	0.00102043	YES	0.52045
STM14_0249_ACY86784.1_+_245196-246623	0.107229	YES	0.606996
STM14_0260_ACY86794.1_+_257853-258410	0.119468	YES	0.616886
STM14_0267_ACY86801.1_+_265621-266106	0.161178	YES	0.650685
STM14_0275_ACY86809.1_+_274887-276650	0.0790733	YES	0.584249
STM14_0286_ACY86819.1_-_285700-286104	0.246097	YES	0.719867
STM14_0289_ACY86822.1_-_287723-288754	0.22808	YES	0.705201
STM14_0291_ACY86824.1_-_289581-289703	0.0743662	YES	0.580442
STM14_0301_ACY86828.1_-_296593-297507	0.0880895	YES	0.591536
STM14_0303_ACY86830.1_+_298940-299719	0.0264189	YES	0.541432
STM14_0304_ACY86831.1_+_299797-300567	0.0712587	YES	0.577928
STM14_0305_ACY86832.1_-_300623-301990	0.0380239	YES	0.55093
STM14_0316_ACY86842.1_-_309322-309816	0.102704	YES	0.603341
STM14_0321_ACY86847.1_+_315199-316692	0.00151243	YES	0.520859
STM14_0324_ACY86850.1_+_317578-318063	0.0389926	YES	0.551721
STM14_0327_ACY86853.1_+_319364-319849	0.0578981	YES	0.567103
STM14_0330_ACY86856.1_+_321796-323100	0.109171	YES	0.608564
STM14_0338_ACY86864.1_+_330558-332747	0.172531	YES	0.659916
STM14_0339_ACY86865.1_+_332771-333217	0.215137	YES	0.694647
STM14_0344_ACY86870.1_+_339345-339485	0.210244	YES	0.690655
STM14_0352_ACY86875.1_+_342894-343406	0.0499829	YES	0.560674
STM14_0358_ACY86881.1_+_349295-350242	0.084801	YES	0.588878
STM14_0368_ACY86891.1_-_357495-358235	0.0665055	YES	0.57408
STM14_0383_ACY86903.1_+_371424-371747	0.0955174	YES	0.597536
STM14_0392_ACY86912.1_-_379666-380424	0.0561041	YES	0.565647
STM14_0393_ACY86913.1_-_380390-381715	0.0172904	YES	0.533925
STM14_0394_ACY86914.1_-_381720-384287	0.0617302	YES	0.570211
STM14_0395_ACY86915.1_-_384271-385032	0.0489723	YES	0.559852
STM14_0402_ACY86922.1_+_390191-390679	0.0384567	YES	0.551284
STM14_0406_ACY86926.1_+_392401-392625	0.0721896	YES	0.578681
STM14_0407_ACY86927.1_+_392683-393042	0.14001	YES	0.63351
STM14_0411_ACY86931.1_+_399120-399233	0.0640347	YES	0.572078
STM14_0413_ACY86933.1_+_401553-402017	0.234819	YES	0.710691
STM14_0418_ACY86938.1_+_405989-408964	0.0102318	YES	0.528095
STM14_0424_ACY86944.1_+_411886-412110	0.0293741	YES	0.543856
STM14_0426_ACY86946.1_+_413356-415464	0.0164995	YES	0.533273
STM14_0444_ACY86964.1_+_432287-433381	0.0543803	YES	0.564247
STM14_0446_ACY86966.1_+_433714-433827	0.271045	YES	0.740067
STM14_0454_ACY86974.1_+_438410-438730	0.0249447	YES	0.540222
STM14_0463_ACY86983.1_-_443622-444533	0.0275873	YES	0.542391
STM14_0489_ACY87008.1_-_468230-469198	0.0977504	YES	0.599339
STM14_0502_ACY87021.1_-_478109-478351	0.0516628	YES	0.562039
STM14_0528_ACY87046.1_-_502053-502166	0.0717614	YES	0.578335
STM14_0534_ACY87052.1_+_508798-509070	0.0627275	YES	0.571019
STM14_0542_ACY87060.1_-_515792-516847	0.027512	YES	0.542329
STM14_0549_ACY87067.1_+_524049-524618	0.132552	YES	0.62747
STM14_0552_ACY87069.1_-_525271-526821	0.0240619	YES	0.539497
STM14_0559_ACY87076.1_-_529941-533090	0.00978043	YES	0.527721
STM14_0562_ACY87079.1_-_535085-535210	0.288414	YES	0.75401
STM14_0575_ACY87092.1_+_547392-547598	0.0592436	YES	0.568194
STM14_0592_ACY87109.1_-_564709-565563	0.0284126	YES	0.543067
STM14_0597_ACY87114.1_+_570227-570331	0.504827	YES	0.903112
STM14_0606_ACY87123.1_+_577258-578076	0.186732	YES	0.67148
STM14_0607_ACY87124.1_+_578161-579942	0.0487894	YES	0.559703
STM14_0629_ACY87146.1_-_602079-602516	0.174892	YES	0.661838
STM14_0633_ACY87150.1_-_604316-604444	0.327526	YES	0.784821
STM14_0635_ACY87152.1_+_604824-605366	0.0396457	YES	0.552254
STM14_0637_ACY87154.1_+_606019-606711	0.111006	YES	0.610047
STM14_0643_ACY87160.1_-_612927-613238	0.133404	YES	0.62816
STM14_0647_ACY87163.1_-_614287-614475	0.0271723	YES	0.54205
STM14_0659_ACY87171.1_-_622266-622520	0.017716	YES	0.534276
STM14_0660_ACY87172.1_+_622504-622740	0.15135	YES	0.642705
STM14_0665_ACY87177.1_+_627603-627788	0.0261303	YES	0.541196
STM14_0667_ACY87179.1_+_630024-632753	0.0371152	YES	0.550188
STM14_0676_ACY87188.1_-_638840-639421	0.0208527	YES	0.536859
STM14_0682_ACY87194.1_-_642252-644507	0.23818	YES	0.713427
STM14_0683_ACY87195.1_-_644504-644635	0.118369	YES	0.615998
STM14_0705_ACY87217.1_-_668737-669639	0.155856	YES	0.646363
STM14_0706_ACY87218.1_-_669956-670702	0.0310443	YES	0.545224
STM14_0714_ACY87226.1_+_678228-678434	0.168883	YES	0.656949
STM14_0717_ACY87229.1_-_679840-680250	0.123933	YES	0.620496
STM14_0722_ACY87234.1_-_684325-685854	0.0580953	YES	0.567263
STM14_0744_ACY87256.1_-_698897-700108	0.0824484	YES	0.586977
STM14_0763_ACY87275.1_+_718694-719401	0.019606	YES	0.535833
STM14_0766_ACY87277.1_+_721536-723008	0.0397001	YES	0.552298
STM14_0767_ACY87278.1_-_723030-724709	0.016679	YES	0.533421
STM14_0777_ACY87288.1_-_733102-733251	0.00177949	YES	0.521081
STM14_0794_ACY87298.1_-_742189-743409	0.0832938	YES	0.587661
STM14_0800_ACY87304.1_+_749621-749734	0.161018	YES	0.650555
STM14_0803_ACY87307.1_+_751487-751819	0.0212437	YES	0.537181
STM14_0812_ACY87316.1_+_758607-758720	0.471439	YES	0.884454
STM14_0814_ACY87318.1_+_759655-760230	0.13092	YES	0.626149
STM14_0842_ACY87346.1_+_788607-789317	0.136397	YES	0.630583
STM14_0845_ACY87349.1_+_792273-794168	0.105901	YES	0.605923
STM14_0856_ACY87360.1_+_805058-806266	0.0203601	YES	0.536453
STM14_0872_ACY87376.1_+_818322-819110	0.252882	YES	0.725376
STM14_0883_ACY87382.1_-_823408-823794	0.372084	YES	0.818438
STM14_0904_ACY87402.1_-_843239-844714	0.0193371	YES	0.535611
STM14_0912_ACY87410.1_-_850660-851943	0.250807	YES	0.723692
STM14_927_ACY87424.1_+_867104-867277	0.184971	YES	0.670046
STM14_928_ACY87425.1_+_867285-869582	0.561821	YES	0.930368
STM14_929_ACY87426.1_-_869674-870582	0.0539709	YES	0.563914
STM14_955_ACY87452.1_-_891514-891774	0.141273	YES	0.634533
STM14_956_ACY87453.1_+_891948-892067	0.17583	YES	0.662601
STM14_960_ACY87457.1_-_893453-895675	0.360891	YES	0.810178
STM14_967_ACY87464.1_-_899158-899316	0.0575724	YES	0.566838
STM14_970_ACY87467.1_-_900375-900506	0.0550166	YES	0.564764
STM14_974_ACY87471.1_-_903009-903137	0.115648	YES	0.613798
STM14_986_ACY87483.1_-_915878-916033	0.0437854	YES	0.555629
STM14_995_ACY87492.1_-_924480-924599	0.890038	YES	0.99526
STM14_1001_ACY87498.1_+_927233-927748	0.0196558	YES	0.535874
STM14_1003_ACY87500.1_+_928531-929478	0.0749115	YES	0.580884
STM14_1006_ACY87502.1_-_931103-931243	0.228322	YES	0.705398
STM14_1008_ACY87504.1_-_933075-933965	0.0148929	YES	0.531948
STM14_1055_ACY87550.1_+_973986-974153	0.285021	YES	0.751297
STM14_1060_ACY87555.1_-_980013-980138	0.297392	YES	0.761163
STM14_1061_ACY87556.1_+_980033-980176	0.155421	YES	0.646009
STM14_1069_ACY87564.1_-_985102-985260	0.0482364	YES	0.559253
STM14_1072_ACY87566.1_-_986008-986685	0.132309	YES	0.627274
STM14_1083_ACY87577.1_+_995071-995565	0.0406166	YES	0.553046
STM14_1086_ACY87580.1_+_1000549-1001892	0.0866486	YES	0.590371
STM14_1092_ACY87586.1_+_1007647-1007754	0.0030082	YES	0.522103
STM14_1109_ACY87603.1_+_1023353-1024036	0.0138039	YES	0.531048
STM14_1121_ACY87615.1_+_1035765-1036568	0.0524798	YES	0.562703
STM14_1125_ACY87619.1_+_1043379-1045220	0.0990103	YES	0.600357
STM14_1141_ACY87635.1_-_1057924-1058172	0.0162606	YES	0.533076
STM14_1149_ACY87643.1_+_1063939-1064178	0.0160706	YES	0.532919
STM14_1150_ACY87644.1_+_1064144-1064518	0.0220302	YES	0.537827
STM14_1155_ACY87649.1_+_1067082-1067372	0.188019	YES	0.67253
STM14_1157_ACY87651.1_+_1068009-1068230	0.0136247	YES	0.5309
STM14_1164_ACY87658.1_+_1071223-1071348	0.284824	YES	0.751139
STM14_1165_ACY87659.1_-_1071484-1071933	0.365584	YES	0.813657
STM14_1170_ACY87664.1_+_1074726-1075259	0.136899	YES	0.63099
STM14_1173_ACY87667.1_+_1079025-1081106	0.168692	YES	0.656793
STM14_1181_ACY87675.1_+_1084368-1087355	0.0181482	YES	0.534632
STM14_1188_ACY87682.1_+_1091136-1094486	0.192992	YES	0.676584
STM14_1189_ACY87683.1_+_1094525-1094767	0.16576	YES	0.654409
STM14_1191_ACY87685.1_+_1097259-1097840	0.201499	YES	0.683521
STM14_1197_ACY87690.1_-_1100911-1101597	0.306917	YES	0.768705
STM14_1209_ACY87702.1_-_1115818-1116021	0.196925	YES	0.67979
STM14_1216_ACY87709.1_-_1121248-1121352	0.110549	YES	0.609678
STM14_1222_ACY87715.1_-_1127421-1128083	0.00934173	YES	0.527358
STM14_1226_ACY87719.1_+_1130516-1131064	0.0606839	YES	0.569362
STM14_1227_ACY87720.1_+_1131090-1131869	0.151513	YES	0.642838
STM14_1235_ACY87727.1_+_1135887-1136207	0.0962584	YES	0.598134
STM14_1237_ACY87729.1_-_1136575-1138260	0.140824	YES	0.634169
STM14_1239_ACY87731.1_-_1138763-1138873	0.134558	YES	0.629094
STM14_1247_ACY87739.1_-_1144070-1145632	0.098225	YES	0.599723
STM14_1249_ACY87741.1_-_1146275-1146388	0.0659675	YES	0.573644
STM14_1251_ACY87743.1_+_1147851-1149317	0.020488	YES	0.536559
STM14_1255_ACY87747.1_+_1150703-1151506	0.0726039	YES	0.579017
STM14_1260_ACY87752.1_-_1155618-1155782	0.0503296	YES	0.560955
STM14_1265_ACY87757.1_-_1158383-1158577	0.0850155	YES	0.589052
STM14_1266_ACY87758.1_+_1158498-1158860	0.0452024	YES	0.556783
STM14_1275_ACY87766.1_+_1164548-1164715	0.48491	YES	0.892216
STM14_1289_ACY87778.1_-_1176396-1176605	0.0441503	YES	0.555927
STM14_1291_ACY87780.1_-_1177413-1177520	0.355345	YES	0.806036
STM14_1292_ACY87781.1_+_1177573-1177704	0.0350205	YES	0.548477
STM14_1303_ACY87791.1_-_1186187-1187020	0.0403903	YES	0.552861
STM14_1310_ACY87798.1_+_1189792-1190247	0.108883	YES	0.608332
STM14_1311_ACY87799.1_+_1190309-1190635	0.289736	YES	0.755066
STM14_1312_ACY87800.1_+_1190766-1191086	0.047269	YES	0.558466
STM14_1317_ACY87805.1_+_1194580-1196115	0.0503909	YES	0.561005
STM14_1325_ACY87813.1_-_1203022-1203597	0.0285669	YES	0.543194
STM14_1337_ACY87825.1_+_1211289-1211936	0.0339013	YES	0.547562
STM14_1342_ACY87830.1_-_1215209-1215502	0.45015	YES	0.871565
STM14_1345_ACY87833.1_+_1216410-1216826	0.0429743	YES	0.554968
STM14_1346_ACY87834.1_+_1216830-1217234	0.00476727	YES	0.523565
STM14_1347_ACY87835.1_+_1217246-1217944	0.358192	YES	0.808166
STM14_1348_ACY87836.1_+_1217971-1219182	0.0595981	YES	0.568482
STM14_1349_ACY87837.1_+_1219203-1219958	0.0622257	YES	0.570612
STM14_1350_ACY87838.1_+_1219972-1220754	0.338931	YES	0.793602
STM14_1354_ACY87842.1_+_1223631-1225292	0.168821	YES	0.656898
STM14_1355_ACY87843.1_+_1225307-1226260	0.211828	YES	0.691947
STM14_1381_ACY87868.1_+_1249316-1249954	0.0496178	YES	0.560377
STM14_1382_ACY87869.1_+_1249935-1250759	0.0172136	YES	0.533862
STM14_1388_ACY87875.1_+_1255591-1255848	0.0518986	YES	0.562231
STM14_1417_ACY87903.1_-_1284622-1285764	0.0695419	YES	0.576539
STM14_1422_ACY87908.1_-_1287269-1288099	0.0826933	YES	0.587175
STM14_1423_ACY87909.1_-_1288092-1290446	0.120255	YES	0.617522
STM14_1428_ACY87914.1_-_1291829-1292914	0.0071411	YES	0.525535
STM14_1429_ACY87915.1_-_1293066-1293533	0.0981061	YES	0.599627
STM14_1430_ACY87916.1_+_1293622-1293774	0.0337129	YES	0.547407
STM14_1446_ACY87932.1_+_1300963-1301523	0.17227	YES	0.659704
STM14_1448_ACY87934.1_+_1302108-1302326	0.387488	YES	0.829571
STM14_1457_ACY87943.1_+_1307993-1308196	0.0576406	YES	0.566894
STM14_1470_ACY87955.1_+_1317320-1320415	0.257758	YES	0.729329
STM14_1475_ACY87960.1_+_1322806-1326168	0.150926	YES	0.642361
STM14_1476_ACY87961.1_+_1326207-1326449	0.16576	YES	0.654409
STM14_1479_ACY87964.1_+_1328944-1329528	0.231977	YES	0.708376
STM14_1483_ACY87967.1_+_1332051-1334153	0.07972	YES	0.584772
STM14_1490_ACY87974.1_-_1338164-1338952	0.00578828	YES	0.524412
STM14_1493_ACY87976.1_-_1339871-1340392	0.166036	YES	0.654634
STM14_1497_ACY87980.1_-_1341151-1341414	0.177192	YES	0.66371
STM14_1501_ACY87983.1_+_1342226-1342783	0.0455547	YES	0.55707
STM14_1510_ACY87990.1_-_1346067-1346216	0.247042	YES	0.720634
STM14_1528_ACY88007.1_+_1358977-1359201	0.175785	YES	0.662565
STM14_1529_ACY88008.1_-_1359269-1359517	0.185445	YES	0.670432
STM14_1546_ACY88025.1_+_1364774-1364911	0.0898312	YES	0.592943
STM14_1556_ACY88035.1_-_1370395-1371681	0.153838	YES	0.644724
STM14_1557_ACY88036.1_+_1371682-1371801	0.0299301	YES	0.544311
STM14_1566_ACY88045.1_+_1379655-1379795	0.0582964	YES	0.567426
STM14_1569_ACY88048.1_+_1380898-1381002	0.422771	YES	0.853919
STM14_1588_ACY88067.1_+_1398533-1399018	0.0913181	YES	0.594144
STM14_1589_ACY88068.1_-_1399093-1400001	0.00153616	YES	0.520879
STM14_1591_ACY88070.1_-_1400923-1401129	0.169632	YES	0.657558
STM14_1593_ACY88072.1_+_1401610-1401732	0.191002	YES	0.674961
STM14_1600_ACY88079.1_-_1407090-1409342	0.445591	YES	0.868707
STM14_1612_ACY88091.1_-_1417094-1418053	0.13077	YES	0.626028
STM14_1614_ACY88093.1_+_1418507-1419361	0.134805	YES	0.629294
STM14_1620_ACY88099.1_+_1424110-1424652	0.0906604	YES	0.593612
STM14_1623_ACY88102.1_-_1425398-1425562	0.152714	YES	0.643812
STM14_1624_ACY88103.1_+_1425654-1426637	0.045267	YES	0.556836
STM14_1634_ACY88113.1_-_1435026-1435217	0.0918352	YES	0.594561
STM14_1639_ACY88118.1_+_1437746-1440124	0.02106	YES	0.537029
STM14_1665_ACY88143.1_+_1464172-1464918	0.0243196	YES	0.539709
STM14_1670_ACY88148.1_-_1469033-1469272	0.264011	YES	0.734389
STM14_1671_ACY88149.1_-_1469355-1469591	0.124515	YES	0.620967
STM14_1687_ACY88165.1_-_1486812-1489574	0.0599731	YES	0.568786
STM14_1693_ACY88171.1_+_1493577-1493903	0.371748	YES	0.818192
STM14_1694_ACY88172.1_+_1493910-1494500	0.0701627	YES	0.577041
STM14_1696_ACY88174.1_+_1494973-1496427	0.429124	YES	0.858116
STM14_1697_ACY88175.1_+_1496443-1497030	0.120083	YES	0.617383
STM14_1700_ACY88178.1_+_1497951-1498733	0.151219	YES	0.642598
STM14_1701_ACY88179.1_+_1498730-1499419	0.124521	YES	0.620972
STM14_1702_ACY88180.1_+_1499513-1499728	0.214676	YES	0.69427
STM14_1704_ACY88182.1_+_1500008-1500256	0.191664	YES	0.675501
STM14_1707_ACY88185.1_+_1501565-1502239	0.0681548	YES	0.575416
STM14_1708_ACY88186.1_+_1502205-1503221	0.0570521	YES	0.566416
STM14_1727_ACY88203.1_-_1517896-1518921	0.0344963	YES	0.548048
STM14_1730_ACY88206.1_-_1520097-1520951	0.544658	YES	0.922776
STM14_1743_ACY88219.1_-_1530344-1530811	0.0193395	YES	0.535613
STM14_1764_ACY88240.1_+_1548438-1548683	0.0644205	YES	0.572391
STM14_1771_ACY88245.1_+_1553745-1553906	0.132865	YES	0.627724
STM14_1772_ACY88246.1_+_1553977-1555380	0.0751392	YES	0.581068
STM14_1790_ACY88263.1_+_1569946-1570116	0.144642	YES	0.637264
STM14_1795_ACY88268.1_-_1572036-1572284	0.658208	YES	0.963553
STM14_1797_ACY88270.1_-_1572679-1573932	0.0797086	YES	0.584763
STM14_1798_ACY88271.1_+_1574052-1574951	0.00450584	YES	0.523348
STM14_1800_ACY88273.1_+_1576425-1577120	0.00203294	YES	0.521292
STM14_1802_ACY88275.1_-_1578501-1579649	0.0673368	YES	0.574753
STM14_1804_ACY88277.1_-_1580306-1581208	0.0377515	YES	0.550708
STM14_1810_ACY88283.1_-_1586812-1587033	0.040129	YES	0.552648
STM14_1812_ACY88285.1_-_1589525-1589833	0.15641	YES	0.646813
STM14_1815_ACY88288.1_-_1591284-1591625	0.106064	YES	0.606054
STM14_1824_ACY88296.1_-_1597964-1598650	0.0388799	YES	0.551629
STM14_1827_ACY88299.1_-_1601704-1601919	0.0638448	YES	0.571925
STM14_1829_ACY88301.1_+_1602052-1602234	0.33373	YES	0.789611
STM14_1837_ACY88309.1_-_1607071-1607454	0.0406521	YES	0.553075
STM14_1871_ACY88343.1_-_1636816-1637064	0.00524408	YES	0.523961
STM14_1888_ACY88359.1_+_1655468-1655611	0.101118	YES	0.602059
STM14_1902_ACY88373.1_+_1668962-1669093	0.0707026	YES	0.577478
STM14_1911_ACY88382.1_-_1679194-1679457	0.115099	YES	0.613354
STM14_1913_ACY88384.1_+_1680178-1680390	0.0620422	YES	0.570464
STM14_1915_ACY88386.1_+_1680342-1680476	0.24327	YES	0.717569
STM14_1920_ACY88391.1_+_1683887-1686007	0.260483	YES	0.731536
STM14_1921_ACY88392.1_-_1686074-1686739	0.052429	YES	0.562662
STM14_1923_ACY88394.1_-_1686958-1687080	0.208083	YES	0.688892
STM14_1933_ACY88404.1_+_1696703-1696807	0.160565	YES	0.650187
STM14_1939_ACY88410.1_-_1701681-1701785	0.252363	YES	0.724955
STM14_1959_ACY88430.1_-_1717819-1719021	0.223032	YES	0.701085
STM14_1960_ACY88431.1_-_1719033-1719608	0.199502	YES	0.681892
STM14_1966_ACY88437.1_-_1725856-1727481	0.00818452	YES	0.5264
STM14_1970_ACY88441.1_+_1729598-1729999	0.197948	YES	0.680625
STM14_1973_ACY88444.1_+_1731115-1731225	0.0194276	YES	0.535686
STM14_1974_ACY88445.1_+_1731270-1732496	0.0246757	YES	0.540001
STM14_1985_ACY88456.1_-_1741311-1745156	0.0619415	YES	0.570382
STM14_1997_ACY88468.1_+_1756108-1756542	0.0149321	YES	0.53198
STM14_2000_ACY88471.1_+_1757286-1758221	0.141612	YES	0.634808
STM14_2001_ACY88472.1_-_1758265-1759638	0.102488	YES	0.603166
STM14_2015_ACY88485.1_-_1770326-1771156	0.0524726	YES	0.562697
STM14_2016_ACY88486.1_-_1771177-1773159	0.00875176	YES	0.526869
STM14_2017_ACY88487.1_-_1773234-1774079	0.0906339	YES	0.593591
STM14_2024_ACY88492.1_-_1779789-1779902	0.180927	YES	0.666751
STM14_2030_ACY88498.1_+_1785562-1786068	0.0859127	YES	0.589777
STM14_2040_ACY88508.1_-_1792437-1793105	0.00554933	YES	0.524214
STM14_2051_ACY88519.1_+_1802254-1802433	0.252527	YES	0.725088
STM14_2052_ACY88520.1_+_1802408-1802707	0.00140844	YES	0.520773
STM14_2071_ACY88539.1_-_1818504-1818674	0.267202	YES	0.736967
STM14_2072_ACY88540.1_-_1819096-1820070	0.0699684	YES	0.576884
STM14_2073_ACY88541.1_+_1820026-1820190	0.373323	YES	0.819343
STM14_2091_ACY88558.1_+_1836247-1836429	0.292303	YES	0.757114
STM14_2092_ACY88559.1_+_1836519-1837022	0.0313532	YES	0.545476
STM14_2107_ACY88573.1_-_1847313-1848320	0.0202558	YES	0.536368
STM14_2110_ACY88576.1_-_1850297-1851928	0.140517	YES	0.633921
STM14_2115_ACY88581.1_+_1857497-1857622	0.520756	YES	0.911318
STM14_2117_ACY88583.1_+_1858398-1858580	0.0579206	YES	0.567121
STM14_2122_ACY88588.1_+_1862257-1863099	0.017319	YES	0.533949
STM14_2151_ACY88614.1_-_1888181-1888351	0.06363	YES	0.57175
STM14_2160_ACY88623.1_-_1895293-1895421	0.176328	YES	0.663007
STM14_2187_ACY88650.1_+_1920441-1920557	0.183286	YES	0.668673
STM14_2193_ACY88656.1_+_1922776-1923483	0.00209532	YES	0.521344
STM14_2221_ACY88684.1_-_1947174-1947317	0.258384	YES	0.729836
STM14_2222_ACY88685.1_+_1947434-1947541	0.418244	YES	0.850892
STM14_2223_ACY88686.1_+_1947556-1947696	0.0070552	YES	0.525463
STM14_2244_ACY88707.1_-_1963417-1964139	0.384411	YES	0.82737
STM14_2247_ACY88710.1_+_1964823-1965218	0.0470806	YES	0.558313
STM14_2250_ACY88713.1_-_1966960-1967154	0.125408	YES	0.621689
STM14_2252_ACY88715.1_+_1967603-1967776	0.308711	YES	0.770119
STM14_2264_ACY88723.1_+_1974277-1974393	0.171202	YES	0.658835
STM14_2267_ACY88726.1_-_1975917-1976180	0.229567	YES	0.706412
STM14_2268_ACY88727.1_+_1976235-1976423	0.280862	YES	0.747963
STM14_2269_ACY88728.1_+_1976488-1976655	0.0478875	YES	0.558969
STM14_2270_ACY88729.1_+_1976705-1976878	0.0665869	YES	0.574146
STM14_2274_ACY88733.1_+_1977760-1978413	0.208535	YES	0.68926
STM14_2277_ACY88735.1_-_1979524-1979643	0.194363	YES	0.677702
STM14_2280_ACY88738.1_-_1980947-1981321	0.0621634	YES	0.570562
STM14_2281_ACY88739.1_+_1981459-1981689	0.00358065	YES	0.522579
STM14_2291_ACY88749.1_-_1990827-1990985	0.00548222	YES	0.524158
STM14_2295_ACY88753.1_+_1992889-1993758	0.0132535	YES	0.530594
STM14_2296_ACY88754.1_+_1993882-1995324	0.139788	YES	0.633331
STM14_2298_ACY88756.1_+_1996367-1996594	0.22354	YES	0.7015
STM14_2303_ACY88761.1_-_2000459-2001469	0.00618346	YES	0.52474
STM14_2339_ACY88796.1_-_2032400-2032531	0.00544492	YES	0.524127
STM14_2366_ACY88819.1_+_2050620-2050775	0.125128	YES	0.621463
STM14_2367_ACY88820.1_+_2050772-2050996	0.177243	YES	0.663752
STM14_2369_ACY88822.1_-_2052017-2052769	0.0283602	YES	0.543025
STM14_2378_ACY88831.1_-_2059063-2060550	0.526064	YES	0.913952
STM14_2379_ACY88832.1_-_2060568-2060705	0.688369	YES	0.970931
STM14_2380_ACY88833.1_+_2060807-2062210	0.495633	YES	0.898169
STM14_2382_ACY88835.1_+_2062632-2063000	0.0493998	YES	0.560199
STM14_2391_ACY88844.1_+_2069619-2070614	0.136051	YES	0.630303
STM14_2399_ACY88852.1_+_2076354-2076731	0.00255621	YES	0.521727
STM14_2420_ACY88872.1_-_2090630-2090842	0.00206965	YES	0.521323
STM14_2428_ACY88879.1_+_2094340-2095347	0.0921967	YES	0.594853
STM14_2447_ACY88897.1_-_2108906-2109106	0.187722	YES	0.672287
STM14_2465_ACY88915.1_-_2120345-2121205	0.0101922	YES	0.528062
STM14_2469_ACY88919.1_-_2122985-2123803	0.049888	YES	0.560596
STM14_2473_ACY88923.1_-_2125758-2125982	0.0296203	YES	0.544057
STM14_2474_ACY88924.1_+_2126080-2126775	0.108581	YES	0.608088
STM14_2476_ACY88926.1_+_2128019-2128846	0.0521802	YES	0.56246
STM14_2489_ACY88936.1_+_2136009-2136482	0.267225	YES	0.736986
STM14_2491_ACY88938.1_+_2137998-2140166	0.241621	YES	0.716227
STM14_2492_ACY88939.1_+_2140223-2141953	0.0994967	YES	0.60075
STM14_2498_ACY88945.1_+_2145540-2145707	0.154525	YES	0.645282
STM14_2530_ACY88975.1_+_2171185-2171859	0.0410279	YES	0.553381
STM14_2531_ACY88976.1_+_2171874-2172395	0.267688	YES	0.73736
STM14_2536_ACY88981.1_+_2175357-2175989	0.0988115	YES	0.600196
STM14_2538_ACY88983.1_+_2176481-2176756	0.0188827	YES	0.535237
STM14_2539_ACY88984.1_+_2176766-2177776	0.0318745	YES	0.545903
STM14_2540_ACY88985.1_+_2177773-2179167	0.143278	YES	0.636159
STM14_2555_ACY89000.1_-_2190227-2192503	0.0166143	YES	0.533368
STM14_2557_ACY89002.1_+_2193122-2195470	0.506825	YES	0.904166
STM14_2566_ACY89011.1_+_2202169-2203473	0.0177302	YES	0.534288
STM14_2581_ACY89026.1_-_2219171-2220172	0.0872218	YES	0.590835
STM14_2584_ACY89029.1_-_2222478-2223791	0.156357	YES	0.64677
STM14_2600_ACY89045.1_-_2240053-2241489	0.0318081	YES	0.545849
STM14_2608_ACY89053.1_-_2247819-2249036	0.0247725	YES	0.540081
STM14_2611_ACY89056.1_-_2250453-2252612	0.0596424	YES	0.568518
STM14_2619_ACY89064.1_-_2259828-2259998	0.0746859	YES	0.580701
STM14_2638_ACY89081.1_-_2284669-2285004	0.0470543	YES	0.558291
STM14_2646_ACY89089.1_-_2291032-2291778	0.042037	YES	0.554204
STM14_2651_ACY89094.1_-_2294185-2294343	0.00255383	YES	0.521725
STM14_2654_ACY89097.1_-_2297911-2298594	0.2368	YES	0.712304
STM14_2656_ACY89099.1_-_2299459-2299740	0.10521	YES	0.605365
STM14_2673_ACY89116.1_-_2317078-2318025	0.11757	YES	0.615351
STM14_2676_ACY89119.1_+_2318810-2318917	0.148797	YES	0.640633
STM14_2679_ACY89122.1_-_2320382-2321818	0.0844168	YES	0.588568
STM14_2696_ACY89139.1_-_2336517-2338037	0.137487	YES	0.631467
STM14_2697_ACY89140.1_+_2338065-2338184	0.179326	YES	0.665448
STM14_2704_ACY89147.1_-_2342649-2342762	0.147199	YES	0.639338
STM14_2706_ACY89149.1_+_2342834-2343067	0.0397631	YES	0.55235
STM14_2724_ACY89167.1_+_2358928-2359059	0.320561	YES	0.779408
STM14_2743_ACY89185.1_+_2371708-2373297	0.117251	YES	0.615094
STM14_2753_ACY89195.1_+_2380214-2380441	0.362331	YES	0.811248
STM14_2759_ACY89200.1_-_2385566-2386009	0.232998	YES	0.709208
STM14_2771_ACY89212.1_-_2395473-2396264	0.183849	YES	0.669131
STM14_2824_ACY89264.1_+_2446348-2447301	0.109981	YES	0.609219
STM14_2834_ACY89274.1_+_2455277-2455405	0.290768	YES	0.75589
STM14_2853_ACY89292.1_-_2473237-2475018	0.022897	YES	0.53854
STM14_2854_ACY89293.1_-_2475407-2475529	0.038808	YES	0.55157
STM14_2856_ACY89295.1_+_2475654-2475836	0.0740697	YES	0.580203
STM14_2870_ACY89309.1_+_2491031-2491153	0.0603297	YES	0.569075
STM14_2871_ACY89310.1_-_2491241-2491357	0.0766554	YES	0.582294
STM14_2872_ACY89311.1_-_2491445-2491597	0.0356732	YES	0.54901
STM14_2875_ACY89314.1_+_2494855-2495454	0.0383738	YES	0.551216
STM14_2881_ACY89320.1_+_2499320-2499454	0.0043623	YES	0.523228
STM14_2883_ACY89322.1_+_2500770-2502914	0.15742	YES	0.647632
STM14_2888_ACY89327.1_-_2507886-2508158	0.117654	YES	0.615419
STM14_2890_ACY89329.1_+_2508681-2508854	0.0479556	YES	0.559025
STM14_2918_ACY89357.1_-_2533907-2535157	0.116842	YES	0.614764
STM14_2919_ACY89358.1_+_2535147-2536148	0.227124	YES	0.704421
STM14_2940_ACY89379.1_+_2553683-2553823	0.17836	YES	0.664661
STM14_2941_ACY89380.1_-_2553820-2553948	0.120642	YES	0.617835
STM14_2942_ACY89381.1_+_2553941-2555254	0.0367296	YES	0.549873
STM14_2955_ACY89393.1_-_2569137-2569283	0.049499	YES	0.56028
STM14_2967_ACY89403.1_+_2580905-2581267	0.264541	YES	0.734818
STM14_2979_ACY89411.1_-_2588322-2589248	0.0979496	YES	0.5995
STM14_2988_ACY89420.1_+_2595966-2596094	0.113644	YES	0.612178
STM14_2989_ACY89421.1_+_2596138-2596395	0.021972	YES	0.53778
STM14_2994_ACY89426.1_+_2600055-2601347	0.0988356	YES	0.600216
STM14_3031_ACY89463.1_-_2631531-2633810	0.00460496	YES	0.52343
STM14_3035_ACY89467.1_-_2637115-2637345	0.0946751	YES	0.596855
STM14_3042_ACY89474.1_+_2643176-2645014	0.0216623	YES	0.537525
STM14_3044_ACY89476.1_+_2645199-2648312	0.040679	YES	0.553097
STM14_3051_ACY89483.1_-_2654544-2655578	0.0239434	YES	0.5394
STM14_3071_ACY89503.1_+_2672763-2672954	0.0751584	YES	0.581083
STM14_3077_ACY89509.1_+_2677631-2678980	0.0616974	YES	0.570184
STM14_3085_ACY89516.1_-_2700161-2702353	0.270432	YES	0.739574
STM14_3086_ACY89517.1_+_2702354-2702470	0.0493402	YES	0.560151
STM14_3090_ACY89521.1_+_2704480-2704581	0.035307	YES	0.548711
STM14_3095_ACY89526.1_-_2708953-2709957	0.166874	YES	0.655315
STM14_3105_ACY89536.1_-_2719315-2724249	0.0282582	YES	0.542941
STM14_3119_ACY89550.1_+_2734356-2734475	0.106561	YES	0.606456
STM14_3123_ACY89554.1_-_2735883-2735993	0.0846501	YES	0.588757
STM14_3135_ACY89566.1_+_2746812-2748002	0.0247362	YES	0.540051
STM14_3136_ACY89567.1_+_2748184-2749728	0.0297614	YES	0.544173
STM14_3145_ACY89576.1_-_2759807-2763694	0.0707251	YES	0.577496
STM14_3163_ACY89594.1_-_2778325-2780124	0.0565149	YES	0.56598
STM14_3164_ACY89595.1_+_2780529-2782022	0.107126	YES	0.606912
STM14_3166_ACY89597.1_+_2782885-2783430	0.085094	YES	0.589115
STM14_3168_ACY89599.1_-_2784866-2785444	0.141273	YES	0.634534
STM14_3171_ACY89602.1_-_2788681-2788917	0.219707	YES	0.698374
STM14_3172_ACY89603.1_-_2788962-2792324	0.150926	YES	0.642361
STM14_3177_ACY89608.1_-_2794715-2797810	0.257758	YES	0.729329
STM14_3190_ACY89620.1_-_2806934-2807137	0.0576406	YES	0.566894
STM14_3201_ACY89630.1_-_2813600-2814163	0.0505827	YES	0.561161
STM14_3202_ACY89631.1_-_2814160-2814285	0.359386	YES	0.809057
STM14_3220_ACY89649.1_+_2823013-2823675	0.0369191	YES	0.550028
STM14_3236_ACY89665.1_-_2833998-2834177	0.0369676	YES	0.550068
STM14_3240_ACY89669.1_+_2836737-2838071	0.0390219	YES	0.551745
STM14_3245_ACY89674.1_-_2841247-2842284	0.0648144	YES	0.57271
STM14_3260_ACY89685.1_+_2855915-2856031	0.189943	YES	0.674098
STM14_3261_ACY89686.1_-_2856033-2858606	0.0418791	YES	0.554076
STM14_3266_ACY89690.1_+_2861585-2861923	0.198298	YES	0.68091
STM14_3286_ACY89710.1_-_2875504-2876094	0.0989935	YES	0.600343
STM14_3298_ACY89720.1_+_2893036-2894445	0.00745715	YES	0.525797
STM14_3326_ACY89747.1_-_2919626-2919739	0.037216	YES	0.55027
STM14_3328_ACY89749.1_+_2921705-2923579	0.232262	YES	0.708608
STM14_3338_ACY89758.1_-_2933465-2934985	0.526064	YES	0.913952
STM14_3340_ACY89760.1_+_2935806-2935976	0.0226003	YES	0.538296
STM14_3341_ACY89761.1_-_2936002-2936229	0.163364	YES	0.652462
STM14_3342_ACY89762.1_-_2936297-2936449	0.0527437	YES	0.562918
STM14_3343_ACY89763.1_+_2936325-2936507	0.256145	YES	0.728022
STM14_3348_ACY89768.1_-_2943824-2946004	0.0677906	YES	0.575121
STM14_3351_ACY89770.1_+_2948161-2948499	0.0814262	YES	0.586151
STM14_3356_ACY89775.1_+_2951059-2951226	0.0517075	YES	0.562075
STM14_3371_ACY89790.1_-_2965386-2965835	0.0575758	YES	0.566841
STM14_3372_ACY89791.1_+_2965822-2965938	0.317037	YES	0.776656
STM14_3379_ACY89798.1_+_2968355-2968534	0.316307	YES	0.776085
STM14_3390_ACY89809.1_+_2974872-2975831	0.0462629	YES	0.557647
STM14_3401_ACY89820.1_-_2984789-2986159	0.134984	YES	0.629439
STM14_3411_ACY89825.1_+_2991063-2991173	0.126431	YES	0.622517
STM14_3412_ACY89826.1_-_2991186-2991371	0.0204563	YES	0.536533
STM14_3414_ACY89828.1_+_2994186-2994350	0.0530068	YES	0.563131
STM14_3415_ACY89829.1_-_2994269-2994475	0.251865	YES	0.724551
STM14_3421_ACY89835.1_+_2998326-2998466	0.458897	YES	0.876951
STM14_3462_ACY89876.1_-_3030207-3031043	0.0502254	YES	0.560871
STM14_3466_ACY89880.1_-_3033296-3033403	0.0787401	YES	0.58398
STM14_3467_ACY89881.1_-_3033576-3034028	0.073005	YES	0.579341
STM14_3472_ACY89886.1_-_3036312-3036554	0.0886362	YES	0.591977
STM14_3473_ACY89887.1_-_3036579-3037757	0.087327	YES	0.59092
STM14_3474_ACY89888.1_+_3038073-3039002	0.201999	YES	0.683929
STM14_3477_ACY89891.1_-_3042308-3043939	0.348484	YES	0.800869
STM14_3481_ACY89895.1_-_3044916-3046973	0.302214	YES	0.764988
STM14_3482_ACY89896.1_-_3046992-3048023	0.652648	YES	0.962049
STM14_3483_ACY89897.1_-_3048094-3049323	0.691482	YES	0.971621
STM14_3484_ACY89898.1_-_3049351-3051132	0.00770105	YES	0.525999
STM14_3491_ACY89905.1_-_3055483-3056493	0.0182444	YES	0.534711
STM14_3496_ACY89910.1_-_3060719-3061837	0.520592	YES	0.911236
STM14_3499_ACY89913.1_+_3064626-3065069	0.257166	YES	0.72885
STM14_3505_ACY89919.1_+_3067569-3067859	0.346831	YES	0.799618
STM14_3508_ACY89921.1_+_3068687-3068806	0.165715	YES	0.654373
STM14_3510_ACY89923.1_-_3069836-3070357	0.130814	YES	0.626064
STM14_3521_ACY89934.1_+_3082061-3082825	0.263507	YES	0.733982
STM14_3527_ACY89940.1_-_3086786-3087919	0.776375	YES	0.985938
STM14_3549_ACY89962.1_-_3106978-3107112	0.122633	YES	0.619445
STM14_3550_ACY89963.1_+_3107324-3108277	0.156335	YES	0.646751
STM14_3560_ACY89973.1_+_3121321-3121458	0.140543	YES	0.633942
STM14_3569_ACY89982.1_-_3131710-3133050	0.0226556	YES	0.538342
STM14_3583_ACY89995.1_-_3143293-3143478	0.0604917	YES	0.569206
STM14_3625_ACY90034.1_+_3183029-3183154	0.551432	YES	0.925836
STM14_3642_ACY90051.1_-_3197131-3197247	0.429363	YES	0.858273
STM14_3656_ACY90065.1_-_3207578-3208321	0.0480132	YES	0.559071
STM14_3664_ACY90073.1_-_3214693-3215070	0.000891976	YES	0.520343
STM14_3669_ACY90076.1_-_3216714-3217472	0.0999338	YES	0.601103
STM14_3675_ACY90082.1_-_3222827-3223540	0.055668	YES	0.565293
STM14_3686_ACY90093.1_-_3230904-3231050	0.256049	YES	0.727944
STM14_3693_ACY90100.1_+_3237457-3237624	0.17357	YES	0.660762
STM14_3697_ACY90104.1_+_3240866-3241195	0.156554	YES	0.646929
STM14_3701_ACY90108.1_-_3243916-3244575	0.00719146	YES	0.525576
STM14_3702_ACY90109.1_+_3244595-3244732	0.459816	YES	0.87751
STM14_3709_ACY90116.1_-_3249831-3250994	0.0515486	YES	0.561946
STM14_3711_ACY90118.1_+_3252233-3252433	0.314926	YES	0.775003
STM14_3722_ACY90129.1_+_3260720-3260824	0.00430769	YES	0.523183
STM14_3728_ACY90135.1_-_3267173-3267904	0.0241144	YES	0.53954
STM14_3746_ACY90152.1_+_3281352-3281642	0.0893181	YES	0.592528
STM14_3763_ACY90168.1_+_3293413-3293547	0.213714	YES	0.693486
STM14_3766_ACY90170.1_-_3294633-3295067	0.204059	YES	0.685609
STM14_3786_ACY90190.1_+_3310018-3310173	0.468181	YES	0.882531
STM14_3792_ACY90195.1_+_3314050-3314181	0.401842	YES	0.83968
STM14_3798_ACY90201.1_+_3318584-3318703	0.140227	YES	0.633686
STM14_3799_ACY90202.1_-_3318870-3319928	0.12549	YES	0.621756
STM14_3801_ACY90204.1_+_3320290-3320487	0.165181	YES	0.653938
STM14_3821_ACY90224.1_+_3335906-3336316	0.199886	YES	0.682205
STM14_3830_ACY90233.1_+_3342234-3342434	0.0993493	YES	0.600631
STM14_3840_ACY90243.1_-_3349441-3349545	0.109445	YES	0.608786
STM14_3841_ACY90244.1_+_3349849-3350832	0.0151913	YES	0.532194
STM14_3859_ACY90262.1_+_3366825-3368294	0.0355341	YES	0.548896
STM14_3878_ACY90281.1_-_3385254-3386555	0.023567	YES	0.539091
STM14_3897_ACY90299.1_+_3404350-3404460	0.119946	YES	0.617272
STM14_3901_ACY90303.1_-_3408358-3408459	0.000724862	YES	0.520204
STM14_3910_ACY90312.1_+_3414641-3415009	0.136554	YES	0.630711
STM14_3922_ACY90324.1_-_3423251-3424615	0.176446	YES	0.663103
STM14_3933_ACY90334.1_+_3436575-3436694	0.156613	YES	0.646977
STM14_3938_ACY90339.1_+_3440518-3440661	0.137744	YES	0.631674
STM14_3948_ACY90347.1_+_3448928-3449518	0.0682239	YES	0.575472
STM14_3962_ACY90361.1_-_3459369-3461258	0.0213608	YES	0.537277
STM14_3971_ACY90370.1_-_3471027-3471479	0.00708028	YES	0.525484
STM14_3974_ACY90372.1_-_3473536-3474600	0.00046937	YES	0.519991
STM14_3986_ACY90383.1_+_3482549-3483982	0.0295539	YES	0.544003
STM14_4001_ACY90397.1_-_3492842-3493654	0.0623554	YES	0.570717
STM14_4008_ACY90404.1_+_3498306-3499739	0.144945	YES	0.63751
STM14_4040_ACY90436.1_+_3529313-3530680	0.106685	YES	0.606556
STM14_4050_ACY90446.1_-_3539826-3540455	0.0403319	YES	0.552814
STM14_4053_ACY90449.1_+_3541795-3541923	0.0427001	YES	0.554745
STM14_4054_ACY90450.1_+_3541927-3542397	0.157516	YES	0.64771
STM14_4055_ACY90451.1_+_3542762-3543025	0.00689803	YES	0.525333
STM14_4056_ACY90452.1_+_3543129-3543395	0.00316177	YES	0.522231
STM14_4068_ACY90464.1_-_3557415-3558458	0.0234277	YES	0.538976
STM14_4075_ACY90471.1_+_3563867-3563971	0.265223	YES	0.735369
STM14_4076_ACY90472.1_+_3563994-3564464	0.0486673	YES	0.559604
STM14_4091_ACY90487.1_+_3576172-3579285	0.0434601	YES	0.555364
STM14_4093_ACY90489.1_+_3579746-3579922	0.0655821	YES	0.573332
STM14_4094_ACY90490.1_-_3580182-3580316	0.0944854	YES	0.596702
STM14_4095_ACY90491.1_+_3580370-3580480	0.419065	YES	0.851443
STM14_4101_ACY90492.1_+_3586043-3586165	0.0743662	YES	0.580442
STM14_4124_ACY90515.1_-_3601224-3601658	0.037126	YES	0.550197
STM14_4132_ACY90523.1_-_3604572-3604886	0.148352	YES	0.640272
STM14_4135_ACY90526.1_-_3605686-3605877	0.0597344	YES	0.568592
STM14_4138_ACY90529.1_-_3607019-3607351	0.0354929	YES	0.548863
STM14_4142_ACY90533.1_-_3608799-3609404	0.0149038	YES	0.531956
STM14_4150_ACY90541.1_-_3613416-3615530	0.0631355	YES	0.57135
STM14_4158_ACY90549.1_+_3619767-3619985	0.267977	YES	0.737593
STM14_4171_ACY90561.1_-_3628792-3629196	0.0147274	YES	0.531811
STM14_4172_ACY90562.1_+_3629162-3629344	0.120657	YES	0.617848
STM14_4179_ACY90569.1_-_3635081-3635653	0.0974405	YES	0.599089
STM14_4180_ACY90570.1_+_3635785-3635937	0.206537	YES	0.687631
STM14_4182_ACY90572.1_-_3637245-3637421	0.0821163	YES	0.586709
STM14_4185_ACY90575.1_-_3640241-3640396	0.084714	YES	0.588808
STM14_4188_ACY90578.1_+_3643029-3648923	0.192982	YES	0.676575
STM14_4207_ACY90597.1_-_3663870-3663983	0.305804	YES	0.767827
STM14_4222_ACY90612.1_+_3678034-3680352	0.0213177	YES	0.537241
STM14_4232_ACY90622.1_-_3687811-3690204	0.0823042	YES	0.586861
STM14_4234_ACY90624.1_+_3690798-3693503	0.117897	YES	0.615616
STM14_4242_ACY90632.1_-_3700146-3700904	0.146062	YES	0.638415
STM14_4270_ACY90658.1_+_3729191-3729319	0.00248623	YES	0.521669
STM14_4272_ACY90660.1_+_3730068-3731282	0.0749184	YES	0.580889
STM14_4278_ACY90666.1_+_3736028-3736444	0.166192	YES	0.65476
STM14_4293_ACY90681.1_+_3747983-3748117	0.167616	YES	0.655919
STM14_4296_ACY90684.1_+_3750462-3750605	0.282089	YES	0.748948
STM14_4299_ACY90687.1_-_3752444-3753919	0.092338	YES	0.594968
STM14_4316_ACY90704.1_+_3770553-3770684	0.112351	YES	0.611134
STM14_4324_ACY90712.1_-_3779865-3781136	0.0155035	YES	0.532451
STM14_4328_ACY90716.1_-_3783693-3784736	0.0392809	YES	0.551956
STM14_4335_ACY90723.1_-_3790937-3792526	0.0610159	YES	0.569631
STM14_4341_ACY90729.1_+_3794402-3795301	0.00643712	YES	0.524951
STM14_4342_ACY90730.1_+_3795374-3796402	0.0179415	YES	0.534462
STM14_4354_ACY90742.1_-_3807400-3807591	0.255911	YES	0.727833
STM14_4357_ACY90745.1_-_3812232-3814532	0.149189	YES	0.640951
STM14_4361_ACY90749.1_+_3818231-3818344	0.173667	YES	0.660841
STM14_4362_ACY90750.1_+_3818365-3819936	0.0513105	YES	0.561753
STM14_4367_ACY90754.1_+_3822117-3822377	0.13225	YES	0.627226
STM14_4379_ACY90766.1_+_3832815-3832976	0.174976	YES	0.661906
STM14_4380_ACY90767.1_+_3832943-3833950	0.0354827	YES	0.548854
STM14_4383_ACY90769.1_-_3836186-3836713	0.0698311	YES	0.576773
STM14_4385_ACY90770.1_-_3837806-3840334	0.105549	YES	0.605639
STM14_4386_ACY90771.1_-_3840357-3841055	0.15468	YES	0.645408
STM14_4387_ACY90772.1_-_3841140-3841676	0.047089	YES	0.558319
STM14_4388_ACY90773.1_+_3842019-3842180	0.0534937	YES	0.563527
STM14_4395_ACY90780.1_-_3847245-3847379	0.0421484	YES	0.554295
STM14_4400_ACY90785.1_+_3850516-3851055	0.161593	YES	0.651023
STM14_4408_ACY90792.1_+_3856473-3856610	0.0202096	YES	0.53633
STM14_4409_ACY90793.1_-_3856590-3856892	0.0353021	YES	0.548707
STM14_4419_ACY90803.1_+_3863890-3864222	0.236441	YES	0.712011
STM14_4423_ACY90807.1_-_3868300-3869100	0.0614945	YES	0.57002
STM14_4430_ACY90814.1_+_3873664-3874650	0.165585	YES	0.654267
STM14_4438_ACY90822.1_-_3881664-3883202	0.170912	YES	0.6586
STM14_4461_ACY90845.1_-_3909728-3910195	0.103213	YES	0.603752
STM14_4465_ACY90849.1_+_3912810-3914093	0.00548707	YES	0.524162
STM14_4477_ACY90861.1_-_3925458-3926156	0.0186899	YES	0.535078
STM14_4478_ACY90862.1_-_3926179-3927189	0.148528	YES	0.640415
STM14_4481_ACY90865.1_-_3929375-3929608	0.150114	YES	0.641702
STM14_4484_ACY90868.1_-_3931551-3932585	0.0156603	YES	0.532581
STM14_4501_ACY90885.1_+_3943928-3944110	0.543987	YES	0.922468
STM14_4520_ACY90903.1_+_3963213-3963356	0.0105938	YES	0.528395
STM14_4521_ACY90904.1_-_3963387-3963497	0.190912	YES	0.674887
STM14_4531_ACY90912.1_+_3973351-3973476	0.184992	YES	0.670063
STM14_4532_ACY90913.1_+_3973531-3974211	0.113281	YES	0.611885
STM14_4535_ACY90916.1_+_3974935-3975075	0.0985082	YES	0.599951
STM14_4540_ACY90921.1_-_3979172-3979297	0.150586	YES	0.642085
STM14_4557_ACY90938.1_+_3992829-3993152	0.187171	YES	0.671839
STM14_4559_ACY90940.1_-_3993522-3994382	0.0765678	YES	0.582223
STM14_4562_ACY90943.1_-_3997356-3997643	0.135149	YES	0.629573
STM14_4580_ACY90961.1_+_4011519-4011680	0.267993	YES	0.737606
STM14_4595_ACY90974.1_+_4020774-4020887	0.170316	YES	0.658115
STM14_4598_ACY90976.1_+_4022921-4023073	0.0836195	YES	0.587924
STM14_4618_ACY90996.1_+_4040144-4042879	0.138017	YES	0.631896
STM14_4627_ACY91004.1_+_4051633-4052529	0.0605022	YES	0.569215
STM14_4632_ACY91009.1_-_4057317-4058717	0.123026	YES	0.619763
STM14_4633_ACY91010.1_+_4059079-4059237	0.0705374	YES	0.577344
STM14_4637_ACY91014.1_+_4060118-4061764	0.193128	YES	0.676694
STM14_4643_ACY91019.1_+_4068926-4069885	0.00890798	YES	0.526999
STM14_4649_ACY91025.1_-_4074433-4075206	0.0682892	YES	0.575524
STM14_4674_ACY91050.1_+_4099001-4099993	0.0246025	YES	0.539941
STM14_4676_ACY91052.1_-_4101443-4103047	0.0859452	YES	0.589803
STM14_4683_ACY91059.1_+_4110237-4111235	0.144015	YES	0.636756
STM14_4695_ACY91064.1_-_4120554-4122074	0.126811	YES	0.622824
STM14_4699_ACY91068.1_+_4124310-4124570	0.114677	YES	0.613014
STM14_4702_ACY91071.1_+_4127531-4129075	0.0912851	YES	0.594117
STM14_4704_ACY91073.1_+_4129673-4130014	0.00687377	YES	0.525313
STM14_4711_ACY91080.1_-_4135518-4136999	0.177847	YES	0.664243
STM14_4735_ACY91099.1_-_4156812-4157981	0.113866	YES	0.612358
STM14_4747_ACY91110.1_+_4165713-4165916	0.283087	YES	0.749748
STM14_4767_ACY91130.1_-_4182251-4183204	0.062666	YES	0.570969
STM14_4770_ACY91133.1_-_4185870-4186004	0.0151216	YES	0.532136
STM14_4800_ACY91158.1_-_4215049-4215231	0.138025	YES	0.631902
STM14_4814_ACY91171.1_+_4224051-4224566	0.161698	YES	0.651108
STM14_4818_ACY91175.1_-_4227859-4228908	0.00463091	YES	0.523452
STM14_4832_ACY91189.1_-_4242249-4244285	0.0278398	YES	0.542598
STM14_4842_ACY91199.1_+_4251795-4252232	0.0333353	YES	0.547099
STM14_4855_ACY91212.1_-_4262691-4263722	0.25302	YES	0.725488
STM14_4856_ACY91213.1_+_4263770-4263904	0.153114	YES	0.644137
STM14_4857_ACY91214.1_+_4263947-4265005	0.423375	YES	0.85432
STM14_4868_ACY91225.1_-_4272426-4272560	0.1914	YES	0.675286
STM14_4883_ACY91240.1_+_4284179-4284679	0.130306	YES	0.625652
STM14_4894_ACY91251.1_+_4293605-4293736	0.00690082	YES	0.525335
STM14_4898_ACY91255.1_-_4296957-4297091	0.37777	YES	0.82258
STM14_4899_ACY91256.1_+_4297086-4298621	0.0355647	YES	0.548921
STM14_4907_ACY91264.1_-_4304730-4305326	0.116666	YES	0.614621
STM14_4915_ACY91272.1_+_4310700-4310939	0.250163	YES	0.723169
STM14_4921_ACY91278.1_-_4314698-4315672	0.02209	YES	0.537877
STM14_4922_ACY91279.1_-_4315766-4316956	0.284399	YES	0.750799
STM14_4926_ACY91283.1_-_4320469-4322259	0.0211396	YES	0.537095
STM14_4929_ACY91286.1_+_4324461-4326893	0.0614322	YES	0.569969
STM14_4934_ACY91291.1_-_4332008-4332127	0.221041	YES	0.699462
STM14_4935_ACY91292.1_+_4332113-4333003	0.253151	YES	0.725594
STM14_4951_ACY91307.1_+_4346784-4346900	0.198986	YES	0.681471
STM14_4954_ACY91310.1_-_4348838-4351489	0.191145	YES	0.675078
STM14_4961_ACY91317.1_-_4358974-4359162	0.00892933	YES	0.527017
STM14_4986_ACY91332.1_+_4376686-4377114	0.0737053	YES	0.579908
STM14_4994_ACY91340.1_-_4388486-4388623	0.212261	YES	0.6923
STM14_4996_ACY91342.1_+_4388931-4389941	0.0380452	YES	0.550948
STM14_4999_ACY91344.1_+_4390264-4390452	0.0047458	YES	0.523547
STM14_5011_ACY91356.1_+_4400290-4400562	0.204038	YES	0.685592
STM14_5013_ACY91358.1_-_4401308-4401763	0.0107589	YES	0.528531
STM14_5038_ACY91379.1_+_4428296-4428397	0.387231	YES	0.829388
STM14_5039_ACY91380.1_+_4428432-4428971	0.103173	YES	0.603719
STM14_5041_ACY91382.1_-_4429884-4430156	0.0357134	YES	0.549043
STM14_5044_ACY91384.1_+_4431313-4431468	0.0557973	YES	0.565398
STM14_5051_ACY91391.1_-_4436356-4437471	0.0523054	YES	0.562561
STM14_5057_ACY91397.1_-_4441014-4441139	0.138655	YES	0.632413
STM14_5076_ACY91415.1_+_4455796-4456038	0.628882	YES	0.95508
STM14_5083_ACY91422.1_-_4462681-4462857	0.0875048	YES	0.591063
STM14_5085_ACY91424.1_-_4462870-4464297	0.0140745	YES	0.531272
STM14_5089_ACY91428.1_+_4467142-4468059	0.305641	YES	0.767698
STM14_5103_ACY91442.1_-_4479085-4480068	0.0282823	YES	0.542961
STM14_5106_ACY91445.1_+_4482683-4484038	0.224131	YES	0.701982
STM14_5114_ACY91453.1_+_4489705-4490358	0.0806616	YES	0.585533
STM14_5117_ACY91456.1_+_4491399-4492031	0.0115079	YES	0.529151
STM14_5119_ACY91458.1_+_4493406-4494725	0.255797	YES	0.72774
STM14_5121_ACY91460.1_+_4496016-4512695	0.334147	YES	0.789932
STM14_5122_ACY91461.1_+_4512735-4514801	0.0757729	YES	0.58158
STM14_5125_ACY91464.1_-_4515741-4515845	0.157066	YES	0.647345
STM14_5127_ACY91466.1_-_4517512-4517835	0.00406504	YES	0.522982
STM14_5131_ACY91470.1_-_4519322-4519456	0.0611469	YES	0.569738
STM14_5132_ACY91471.1_-_4519489-4519611	0.174257	YES	0.661321
STM14_5134_ACY91473.1_-_4521030-4521188	0.027098	YES	0.541989
STM14_5142_ACY91481.1_+_4529401-4529547	0.0408358	YES	0.553225
STM14_5150_ACY91489.1_+_4536377-4536649	0.0113287	YES	0.529002
STM14_5167_ACY91506.1_-_4551180-4551941	0.14686	YES	0.639063
STM14_5170_ACY91509.1_-_4554739-4555815	0.192643	YES	0.676299
STM14_5175_ACY91514.1_-_4562136-4562402	0.472054	YES	0.884816
STM14_5185_ACY91524.1_-_4572913-4573182	0.269069	YES	0.738474
STM14_5186_ACY91525.1_-_4573190-4573405	0.521592	YES	0.911736
STM14_5188_ACY91527.1_-_4573712-4574587	0.20549	YES	0.686776
STM14_5206_ACY91544.1_+_4587425-4587898	0.0129754	YES	0.530364
STM14_5207_ACY91545.1_+_4587942-4589588	0.0928173	YES	0.595355
STM14_5211_ACY91549.1_+_4591089-4591223	0.210462	YES	0.690833
STM14_5212_ACY91550.1_-_4591232-4591378	0.0169786	YES	0.533668
STM14_5216_ACY91554.1_+_4593310-4593456	0.0578766	YES	0.567085
STM14_5242_ACY91577.1_+_4617406-4617714	0.0858252	YES	0.589706
STM14_5249_ACY91584.1_+_4623431-4623856	0.0194097	YES	0.535671
STM14_5260_ACY91595.1_-_4634111-4634431	0.0798263	YES	0.584858
STM14_5263_ACY91598.1_-_4635776-4636531	0.0298817	YES	0.544271
STM14_5274_ACY91609.1_+_4643067-4643273	0.0134952	YES	0.530793
STM14_5280_ACY91615.1_-_4645907-4646542	0.0832593	YES	0.587633
STM14_5285_ACY91620.1_-_4651010-4651858	0.0308759	YES	0.545086
STM14_5286_ACY91621.1_+_4651946-4652332	0.0883886	YES	0.591777
STM14_5291_ACY91626.1_-_4655902-4656081	0.0649036	YES	0.572782
STM14_5296_ACY91631.1_+_4658883-4660616	0.218074	YES	0.697042
STM14_5307_ACY91642.1_+_4671371-4672204	0.1193	YES	0.61675
STM14_5309_ACY91644.1_-_4673931-4674110	0.365247	YES	0.813409
STM14_5313_ACY91648.1_-_4678291-4678593	0.0777514	YES	0.58318
STM14_5321_ACY91656.1_-_4685247-4687178	0.0199636	YES	0.536127
STM14_5330_ACY91664.1_+_4696110-4696496	0.0118978	YES	0.529473
STM14_5340_ACY91674.1_+_4704281-4704523	0.163073	YES	0.652225
STM14_5344_ACY91678.1_+_4707729-4707899	0.252097	YES	0.724739
STM14_5353_ACY91686.1_-_4716803-4717738	0.0901781	YES	0.593223
STM14_5367_ACY91700.1_-_4727023-4727145	0.346211	YES	0.799148
STM14_5368_ACY91701.1_-_4727224-4727712	0.00317683	YES	0.522243
STM14_5377_ACY91710.1_-_4737564-4738562	0.0429744	YES	0.554968
STM14_5406_ACY91737.1_+_4772201-4772314	0.12118	YES	0.61827
STM14_5407_ACY91738.1_-_4772241-4772357	0.77719	YES	0.986039
STM14_5411_ACY91742.1_+_4773885-4774658	0.0765453	YES	0.582205
STM14_5412_ACY91743.1_-_4774659-4775672	0.0443444	YES	0.556085
STM14_5426_ACY91757.1_-_4786173-4786316	0.0789053	YES	0.584113
STM14_5431_ACY91762.1_-_4788756-4788899	0.004437	YES	0.523291
STM14_5442_ACY91773.1_+_4798756-4799058	0.0153409	YES	0.532317
STM14_5457_ACY91788.1_-_4815106-4815567	0.260313	YES	0.731398
STM14_5465_ACY91796.1_-_4820361-4820819	0.0678591	YES	0.575176
STM14_5474_ACY91802.1_+_4824998-4825105	0.268519	YES	0.738031
STM14_5480_ACY91808.1_+_4828712-4829329	0.0604208	YES	0.569149
STM14_5492_ACY91820.1_-_4839300-4841708	0.0223581	YES	0.538097
STM14_5495_ACY91823.1_-_4843244-4843933	0.0222813	YES	0.538034
STM14_5512_ACY91840.1_-_4860644-4861729	0.0321473	YES	0.546127
STM14_5514_ACY91842.1_-_4862345-4864882	0.0958341	YES	0.597792
STM14_5515_ACY91843.1_-_4864928-4865611	0.106056	YES	0.606048
STM14_5516_ACY91844.1_-_4865682-4866227	0.0371514	YES	0.550218
STM14_5518_ACY91846.1_-_4867622-4867936	0.184173	YES	0.669396
STM14_5520_ACY91848.1_+_4869015-4869155	0.0843546	YES	0.588518

## Sheet: LT2
Protein	Score	T3S protein or Not	Probability
STM0001_NP_459006.1_+_190-255	0.445866	YES	0.868881
STM0002_NP_459007.1_+_337-2799	0.0590027	YES	0.567999
STM0004_NP_459009.1_+_3734-5020	0.0158782	YES	0.532761
STM0011_NP_459016.1_-_10841-11245	0.182479	YES	0.668016
STM0017_NP_459022.1_-_17043-17486	0.135405	YES	0.62978
STM0019_NP_459024.1_+_20058-23054	0.0217777	YES	0.53762
STM0022_NP_459027.1_+_25112-25798	0.218047	YES	0.69702
STM0025_NP_459030.1_+_29433-29978	0.0737766	YES	0.579966
STM0028_NP_459033.1_+_31274-32119	0.0092188	YES	0.527256
STM0031_NP_459036.1_-_34376-34816	0.135829	YES	0.630123
STM0032_NP_459037.1_+_35339-37057	0.136383	YES	0.630572
STM0038_NP_459043.1_+_44312-46027	0.0481309	YES	0.559167
STM0043_NP_459048.1_-_52280-52543	0.184337	YES	0.669529
STM0082_NP_459087.1_-_94771-95061	0.0170715	YES	0.533745
STM0093_NP_459098.1_-_105810-108170	0.0118464	YES	0.529431
STM0111_NP_459116.1_-_129673-131073	0.0312346	YES	0.545379
STM0113_NP_459118.1_-_132167-133738	0.0134281	YES	0.530738
STM0134_NP_459139.1_+_156935-157852	0.0645052	YES	0.57246
STM0135_NP_459140.1_+_158199-158627	0.129393	YES	0.624914
STM0143_NP_459148.1_-_166319-167704	0.0966567	YES	0.598456
STM0153_NP_459158.1_+_178918-180807	0.219195	YES	0.697957
STM0157_NP_459162.1_-_183846-185468	0.158734	YES	0.648699
STM0159_NP_459164.1_-_188515-189357	0.0213607	YES	0.537277
STM0162_NP_459167.1_+_191150-192421	0.150031	YES	0.641635
STM0164_NP_459169.1_+_193404-194171	0.0130269	YES	0.530406
STM0165_NP_459170.1_-_194201-194995	0.045035	YES	0.556647
STM0176_NP_459181.1_-_207652-208335	0.203613	YES	0.685246
STM0183_NP_459188.1_-_213398-213877	0.0186876	YES	0.535076
STM0191_NP_459196.1_+_223738-225927	0.150935	YES	0.642369
STM0195_NP_459200.1_+_230657-231217	0.0557482	YES	0.565358
STM0199_NP_459204.1_+_235258-235734	0.0220581	YES	0.53785
STM0202_NP_459207.1_-_237211-238491	0.00102043	YES	0.52045
STM0209_NP_459214.1_+_244492-245919	0.107229	YES	0.606996
STM0219_NP_459224.1_+_257148-257705	0.119468	YES	0.616886
STM0225_NP_459230.1_+_264916-265401	0.161178	YES	0.650685
STM0233_NP_459238.1_+_274183-275946	0.0790733	YES	0.584249
STM0244_NP_459248.1_-_285000-285404	0.246097	YES	0.719867
STM0247_NP_459251.1_-_287023-288054	0.22808	YES	0.705201
STM0256_NP_459254.1_-_295893-296807	0.0880895	YES	0.591536
STM0258_NP_459256.1_+_298240-299019	0.0264189	YES	0.541432
STM0259_NP_459257.1_+_299097-299867	0.0712587	YES	0.577928
STM0260_NP_459258.1_-_299923-301290	0.0380239	YES	0.55093
STM0269_NP_459266.1_-_308622-309116	0.102704	YES	0.603341
STM0274_NP_459271.1_+_314499-316007	0.0475906	YES	0.558728
STM0276_NP_459274.1_+_316893-317378	0.0389926	YES	0.551721
STM0279_NP_459277.1_+_318679-319164	0.0578981	YES	0.567103
STM0282_NP_459280.1_+_321111-322415	0.109171	YES	0.608564
STM0289_NP_459287.1_+_329873-332062	0.172531	YES	0.659916
STM0290_NP_459288.1_+_332086-332532	0.215137	YES	0.694647
STM0299_NP_459297.1_+_342209-342721	0.0499829	YES	0.560674
STM0304_NP_459302.1_+_348610-349557	0.084801	YES	0.588878
STM0312_NP_459310.1_-_356810-357550	0.0665055	YES	0.57408
STM0327_NP_459322.1_+_370739-371062	0.0955174	YES	0.597536
STM0336_NP_459331.1_-_378981-379739	0.0561041	YES	0.565647
STM0337_NP_459332.1_-_379705-381030	0.0172904	YES	0.533925
STM0338_NP_459333.1_-_381035-383596	0.0251564	YES	0.540396
STM0339_NP_459334.1_-_383580-384341	0.0489723	YES	0.559852
STM0345_NP_459340.1_+_389499-389987	0.0648781	YES	0.572762
STM0348_NP_459343.1_+_391708-391932	0.0721896	YES	0.578681
STM0349_NP_459344.1_+_391990-392349	0.14001	YES	0.63351
STM0354_NP_459349.1_+_400860-401324	0.234819	YES	0.710691
STM0358.S_NP_459353.2_+_405296-408271	0.0102318	YES	0.528095
STM0362_NP_459357.1_+_411193-411417	0.0293741	YES	0.543856
STM0364_NP_459359.1_+_412663-414771	0.0164995	YES	0.533273
STM0377_NP_459372.1_+_431594-432688	0.0543803	YES	0.564247
STM0384_NP_459379.1_+_437717-438037	0.0249447	YES	0.540222
STM0392_NP_459387.1_-_442929-443840	0.0275873	YES	0.542391
STM0424_NP_459419.1_-_477416-477658	0.0516628	YES	0.562039
STM0451_NP_459447.1_+_508105-508377	0.0627275	YES	0.571019
STM0458_NP_459454.1_-_515099-516154	0.027512	YES	0.542329
STM0465_NP_459461.1_+_523355-523924	0.132552	YES	0.62747
STM0468_NP_459463.1_-_524577-526127	0.0240619	YES	0.539497
STM0475_NP_459470.1_-_529247-532396	0.00978043	YES	0.527721
STM0504_NP_459499.1_-_564015-564869	0.0284126	YES	0.543067
STM0516_NP_459511.1_+_576564-577382	0.186732	YES	0.67148
STM0517_NP_459512.1_+_577467-579248	0.0487894	YES	0.559703
STM0539_NP_459534.1_-_601385-601822	0.174892	YES	0.661838
STM0543_NP_459538.2_+_604130-604672	0.0396457	YES	0.552254
STM0545_NP_459540.1_+_605325-606017	0.111006	YES	0.610047
STM0551_NP_459546.1_-_612233-612544	0.133404	YES	0.62816
STM0554_NP_459548.1_-_613593-613781	0.0271723	YES	0.54205
STM0565_NP_459557.1_+_621810-622046	0.15135	YES	0.642705
STM0571_NP_459563.1_+_629330-632059	0.0371152	YES	0.550188
STM0580_NP_459572.1_-_638146-638727	0.0208527	YES	0.536859
STM0585_NP_459577.1_-_641558-643813	0.223221	YES	0.70124
STM0606_NP_459598.1_-_668043-668945	0.155856	YES	0.646363
STM0607_NP_459599.1_-_669262-670008	0.0310443	YES	0.545224
STM0616_NP_459608.1_-_679344-679754	0.123933	YES	0.620496
STM0621_NP_459613.1_-_683829-685358	0.0580953	YES	0.567263
STM0637_NP_459629.1_-_698401-699612	0.0824484	YES	0.586977
STM0655_NP_459647.1_+_718198-718905	0.019606	YES	0.535833
STM0658_NP_459650.1_+_721039-722511	0.0397001	YES	0.552298
STM0659_NP_459651.1_-_722533-724212	0.016679	YES	0.533421
STM0682_NP_459667.1_-_741692-742912	0.0832938	YES	0.587661
STM0688_NP_459673.1_+_750990-751322	0.0212437	YES	0.537181
STM0697_NP_459682.1_+_759191-759733	0.0993544	YES	0.600635
STM0723_NP_459708.1_+_788110-788820	0.136397	YES	0.630583
STM0726_NP_459711.1_+_791776-793671	0.105901	YES	0.605923
STM0737_NP_459722.1_+_804561-805769	0.0203601	YES	0.536453
STM0750_NP_459735.1_+_817825-818613	0.252882	YES	0.725376
STM0759_NP_459739.1_-_823066-823452	0.372084	YES	0.818438
STM0778_NP_459757.1_-_842899-844374	0.0193371	YES	0.535611
STM0786_NP_459765.1_-_850320-851603	0.250807	YES	0.723692
STM0800_NP_459778.1_+_866944-869241	0.561821	YES	0.930368
STM0801_NP_459779.1_-_869333-870241	0.0539709	YES	0.563914
STM0823_NP_459801.1_-_890462-890722	0.141273	YES	0.634533
STM0827_NP_459804.1_-_892401-894623	0.360891	YES	0.810178
STM0854_NP_459831.1_+_926181-926696	0.0196558	YES	0.535874
STM0856_NP_459833.1_+_927479-928426	0.0749115	YES	0.580884
STM0859_NP_459836.1_-_932023-932913	0.0148929	YES	0.531948
STM0896_NP_459872.1_-_965341-965733	0.0575346	YES	0.566808
STM0898_NP_459874.1_-_967911-968606	0.08089	YES	0.585718
STM0898A_NP_459875.1_+_968719-968973	0.158316	YES	0.64836
STM0909_NP_459886.1_+_979090-979581	0.126174	YES	0.622309
STM0920_NP_459897.1_+_992242-992760	0.00335438	YES	0.522391
STM0927_NP_459904.1_+_1001442-1002017	0.316882	YES	0.776535
STM0950_NP_459926.1_-_1027679-1028356	0.132309	YES	0.627274
STM0959_NP_459935.1_+_1036742-1037236	0.0406166	YES	0.553046
STM0962_NP_459938.1_+_1042190-1043533	0.0866486	YES	0.590371
STM0980_NP_459955.1_+_1064994-1065677	0.0138039	YES	0.531048
STM0991_NP_459966.1_+_1077406-1078209	0.0524798	YES	0.562703
STM0995_NP_459970.1_+_1085020-1086861	0.0990103	YES	0.600357
STM1006_NP_459981.1_-_1099565-1099813	0.0162606	YES	0.533076
STM1013_NP_459988.1_+_1105785-1106159	0.0220302	YES	0.537827
STM1018_NP_459993.1_+_1108723-1109013	0.187958	YES	0.67248
STM1024_NP_459999.1_+_1112864-1112989	0.284824	YES	0.751139
STM1025_NP_460000.1_-_1113125-1113574	0.365584	YES	0.813657
STM1030_NP_460005.1_+_1116367-1116900	0.136899	YES	0.63099
STM1033_NP_460008.1_+_1120666-1122747	0.168692	YES	0.656793
STM1041_NP_460016.1_+_1126009-1128996	0.0181482	YES	0.534632
STM1048_NP_460023.1_+_1132792-1135239	0.192992	YES	0.676584
STM1050_NP_460025.1_+_1138914-1139495	0.201499	YES	0.683521
STM1055_NP_460029.1_-_1142566-1143252	0.306917	YES	0.768705
STM1077_NP_460051.1_-_1169077-1169739	0.00934173	YES	0.527358
STM1081_NP_460055.1_+_1172172-1172720	0.0606839	YES	0.569362
STM1082_NP_460056.1_+_1172746-1173525	0.151513	YES	0.642838
STM1089_NP_460062.1_+_1177543-1177863	0.0962584	YES	0.598134
STM1091_NP_460064.1_-_1178231-1179916	0.140824	YES	0.634169
STM1093_NP_460066.1_-_1180419-1180529	0.134558	YES	0.629094
STM1099_NP_460072.1_-_1185726-1187288	0.098225	YES	0.599723
STM1102_NP_460075.1_+_1189507-1190973	0.020488	YES	0.536559
STM1105_NP_460078.1_+_1192359-1193162	0.0726039	YES	0.579017
STM1113_NP_460086.1_+_1200154-1200516	0.0452024	YES	0.556783
STM1121_NP_460093.1_+_1206204-1206371	0.48491	YES	0.892216
STM1139_NP_460110.1_-_1228025-1228858	0.0403903	YES	0.552861
STM1144_NP_460115.1_+_1231630-1232085	0.108883	YES	0.608332
STM1145_NP_460116.1_+_1232147-1232473	0.289736	YES	0.755066
STM1146_NP_460117.1_+_1232604-1232924	0.047269	YES	0.558466
STM1150_NP_460121.1_+_1236418-1237953	0.0503909	YES	0.561005
STM1157_NP_460128.1_-_1244860-1245435	0.0285669	YES	0.543194
STM1168_NP_460139.1_+_1253127-1253774	0.0339013	YES	0.547562
STM1172_NP_460143.1_-_1257046-1257339	0.45015	YES	0.871565
STM1174_NP_460145.1_+_1258247-1258663	0.0429743	YES	0.554968
STM1175_NP_460146.1_+_1258667-1259071	0.00476727	YES	0.523565
STM1176_NP_460147.1_+_1259083-1259781	0.358192	YES	0.808166
STM1177_NP_460148.1_+_1259808-1261019	0.0595981	YES	0.568482
STM1178_NP_460149.1_+_1261040-1261795	0.0622257	YES	0.570612
STM1179_NP_460150.1_+_1261809-1262591	0.338931	YES	0.793602
STM1183_NP_460154.1_+_1265468-1267129	0.168821	YES	0.656898
STM1184_NP_460155.1_+_1267144-1268097	0.211828	YES	0.691947
STM1207_NP_460177.1_+_1291153-1291791	0.0496178	YES	0.560377
STM1208_NP_460178.1_+_1291772-1292596	0.0172136	YES	0.533862
STM1214_NP_460184.1_+_1297428-1297685	0.0518986	YES	0.562231
STM1240_NP_460210.1_-_1328189-1328977	0.00578828	YES	0.524412
STM1242_NP_460212.1_-_1329896-1330417	0.166036	YES	0.654634
STM1244_NP_460214.1_-_1331176-1331439	0.177192	YES	0.66371
STM1246_NP_460215.1_+_1332251-1332808	0.0455547	YES	0.55707
STM1267_NP_460233.1_-_1349294-1349542	0.204027	YES	0.685583
STM1284_NP_460250.1_-_1360419-1361705	0.153838	YES	0.644724
STM1308_NP_460274.1_+_1388557-1389042	0.0913181	YES	0.594144
STM1309_NP_460275.1_-_1389117-1390025	0.00153616	YES	0.520879
STM1318_NP_460284.1_-_1397114-1399366	0.445591	YES	0.868707
STM1328_NP_460294.1_-_1407118-1408077	0.13077	YES	0.626028
STM1330_NP_460296.1_+_1408531-1409385	0.134805	YES	0.629294
STM1334.c_NP_460300.2_+_1414134-1414676	0.0906604	YES	0.593612
STM1337_NP_460303.1_+_1415678-1416661	0.045267	YES	0.556836
STM1346_NP_460312.1_-_1425050-1425241	0.0918352	YES	0.594561
STM1349_NP_460315.1_+_1427770-1430148	0.02106	YES	0.537029
STM1371_NP_460336.1_+_1454196-1454942	0.0243196	YES	0.539709
STM1376_NP_460341.1_-_1459057-1459296	0.264011	YES	0.734389
STM1377_NP_460342.1_-_1459379-1459615	0.124515	YES	0.620967
STM1392_NP_460357.1_-_1476836-1479598	0.0599731	YES	0.568786
STM1397_NP_460362.1_+_1483601-1483927	0.371748	YES	0.818192
STM1398_NP_460363.1_+_1483934-1484524	0.0701627	YES	0.577041
STM1400_NP_460365.1_+_1484997-1486451	0.429124	YES	0.858116
STM1401_NP_460366.1_+_1486467-1487054	0.120083	YES	0.617383
STM1404_NP_460369.1_+_1487975-1488757	0.151219	YES	0.642598
STM1405_NP_460370.1_+_1488754-1489443	0.124521	YES	0.620972
STM1406_NP_460371.1_+_1489537-1489752	0.214676	YES	0.69427
STM1408_NP_460373.1_+_1490032-1490280	0.191664	YES	0.675501
STM1411_NP_460376.1_+_1491589-1492263	0.0681548	YES	0.575416
STM1412_NP_460377.1_+_1492229-1493245	0.0570521	YES	0.566416
STM1430_NP_460393.1_-_1507920-1508945	0.0344963	YES	0.548048
STM1432_NP_460395.1_-_1510121-1510975	0.544658	YES	0.922776
STM1445_NP_460408.1_-_1520368-1520835	0.0193395	YES	0.535613
STM1469_NP_460430.1_+_1544000-1545403	0.0751392	YES	0.581068
STM1485_NP_460445.1_-_1562058-1562342	0.589263	YES	0.941417
STM1486_NP_460446.1_-_1562701-1563954	0.0797086	YES	0.584763
STM1487_NP_460447.1_+_1564074-1564973	0.00450584	YES	0.523348
STM1489_NP_460449.1_+_1566447-1567142	0.00203294	YES	0.521292
STM1491_NP_460451.1_-_1568523-1569671	0.0673368	YES	0.574753
STM1493_NP_460453.1_-_1570328-1571230	0.0377515	YES	0.550708
STM1500_NP_460460.1_-_1579547-1579855	0.15641	YES	0.646813
STM1503_NP_460463.1_-_1581306-1581647	0.106064	YES	0.606054
STM1510_NP_460470.1_-_1587986-1588672	0.0388799	YES	0.551629
STM1513_NP_460473.1_+_1592074-1592256	0.33373	YES	0.789611
STM1519.S_NP_460479.2_-_1597094-1597483	0.0351052	YES	0.548546
STM1551_NP_460511.1_-_1626839-1627087	0.00524408	YES	0.523961
STM1565_NP_460524.1_+_1645491-1645634	0.101118	YES	0.602059
STM1587_NP_460546.1_+_1673910-1676030	0.260483	YES	0.731536
STM1588_NP_460547.1_-_1676097-1676762	0.052429	YES	0.562662
STM1620_NP_460579.1_-_1707842-1709044	0.223032	YES	0.701085
STM1621_NP_460580.1_-_1709056-1709631	0.199502	YES	0.681892
STM1626_NP_460585.1_-_1715879-1717504	0.00818452	YES	0.5264
STM1631_NP_460590.1_+_1721293-1722519	0.0246757	YES	0.540001
STM1652_NP_460611.1_+_1746131-1746565	0.0149321	YES	0.53198
STM1654_NP_460613.1_+_1747309-1748244	0.114622	YES	0.612969
STM1655_NP_460614.1_-_1748288-1749661	0.102488	YES	0.603166
STM1668_NP_460626.1_-_1760349-1761179	0.0524726	YES	0.562697
STM1669_NP_460627.1_-_1761200-1763182	0.00875176	YES	0.526869
STM1670_NP_460628.1_-_1763257-1764102	0.0906339	YES	0.593591
STM1682_NP_460640.1_+_1775584-1776090	0.0859127	YES	0.589777
STM1690_NP_460648.1_-_1781747-1782415	0.00554933	YES	0.524214
STM1698A_NP_460657.1_+_1791565-1791744	0.252527	YES	0.725088
STM1699_NP_460658.1_+_1791719-1792018	0.00140844	YES	0.520773
STM1713_NP_460672.1_-_1808407-1809381	0.0699684	YES	0.576884
STM1728_NP_460687.1_+_1825558-1825740	0.292303	YES	0.757114
STM1729_NP_460688.1_+_1825830-1826333	0.0313532	YES	0.545476
STM1743_NP_460702.1_-_1836624-1837631	0.0202558	YES	0.536368
STM1746.S_NP_460705.2_-_1839608-1841239	0.140517	YES	0.633921
STM1756_NP_460715.1_+_1851568-1852410	0.017319	YES	0.533949
STM1814_NP_460770.1_+_1912087-1912794	0.00209532	YES	0.521344
STM1838_NP_460794.1_-_1935769-1935912	0.258384	YES	0.729836
STM1855_NP_460811.1_-_1952012-1952734	0.384411	YES	0.82737
STM1856_NP_460812.1_+_1953418-1953813	0.0470806	YES	0.558313
STM1859_NP_460815.2_+_1956198-1956371	0.308711	YES	0.770119
STM1868.1N_NP_945163.1_-_1964512-1964775	0.229567	YES	0.706412
STM1868A_NP_460824.1_+_1965083-1965250	0.0478875	YES	0.558969
STM1870_NP_460827.1_+_1966514-1967008	0.103145	YES	0.603697
STM1872_NP_460829.1_-_1968119-1968238	0.194363	YES	0.677702
STM1875_NP_460832.1_-_1969542-1969916	0.0621634	YES	0.570562
STM1876_NP_460833.1_+_1970054-1970284	0.00358065	YES	0.522579
STM1887_NP_460844.1_+_1981484-1982353	0.0132535	YES	0.530594
STM1888_NP_460845.1_+_1982477-1983919	0.139788	YES	0.633331
STM1894_NP_460851.1_-_1989054-1990064	0.00618346	YES	0.52474
STM1919_NP_460876.1_-_2014756-2016417	0.120111	YES	0.617406
STM1949_NP_460902.1_+_2039367-2039591	0.177243	YES	0.663752
STM1951_NP_460904.1_-_2040612-2041364	0.0283602	YES	0.543025
STM1959_NP_460912.1_-_2047658-2049145	0.526064	YES	0.913952
STM1960_NP_460913.1_+_2049402-2050805	0.495633	YES	0.898169
STM1962_NP_460915.1_+_2051227-2051595	0.0493998	YES	0.560199
STM1970_NP_460923.1_+_2058214-2059209	0.136051	YES	0.630303
STM1978_NP_460931.1_+_2064949-2065326	0.00255621	YES	0.521727
STM1996_NP_460947.1_-_2079225-2079437	0.00206965	YES	0.521323
STM2005_NP_460952.1_+_2084458-2084931	0.267225	YES	0.736986
STM2008_NP_460955.1_+_2088672-2090402	0.0994967	YES	0.60075
STM2011.1n_NP_951052.1_+_2093989-2094156	0.154525	YES	0.645282
STM2041_NP_460986.1_+_2119633-2120307	0.0410279	YES	0.553381
STM2042_NP_460987.1_+_2120322-2120843	0.267688	YES	0.73736
STM2047_NP_460992.1_+_2123805-2124437	0.0988115	YES	0.600196
STM2049_NP_460994.1_+_2124929-2125204	0.0188827	YES	0.535237
STM2050_NP_460995.1_+_2125214-2126224	0.0318745	YES	0.545903
STM2051_NP_460996.1_+_2126221-2127615	0.143278	YES	0.636159
STM2065_NP_461010.1_-_2138675-2140951	0.0166143	YES	0.533368
STM2066_NP_461011.1_+_2141570-2143918	0.506825	YES	0.904166
STM2072_NP_461017.1_+_2150617-2151921	0.0177302	YES	0.534288
STM2087_NP_461032.1_-_2167619-2168620	0.0872218	YES	0.590835
STM2090_NP_461035.1_-_2170926-2172239	0.156357	YES	0.64677
STM2105.S_NP_461050.2_-_2188501-2189937	0.0318081	YES	0.545849
STM2113_NP_461058.1_-_2196266-2197483	0.0247725	YES	0.540081
STM2116_NP_461061.1_-_2198900-2201059	0.0596424	YES	0.568518
STM2137_NP_461081.1_+_2231496-2232542	0.253901	YES	0.726203
STM2139_NP_461083.1_-_2233116-2233451	0.0470543	YES	0.558291
STM2145_NP_461089.1_-_2239479-2240225	0.042037	YES	0.554204
STM2151_NP_461095.1_-_2246358-2247041	0.2368	YES	0.712304
STM2153_NP_461097.1_-_2247906-2248187	0.10521	YES	0.605365
STM2168_NP_461113.1_-_2265525-2266472	0.11757	YES	0.615351
STM2172_NP_461117.1_-_2268829-2270265	0.0844168	YES	0.588568
STM2189_NP_461134.1_-_2284964-2286484	0.137487	YES	0.631467
STM2219_NP_461163.1_+_2320155-2321744	0.117251	YES	0.615094
STM2227_NP_461171.1_+_2328661-2328888	0.362331	YES	0.811248
STM2233_NP_461176.1_-_2334013-2334456	0.232998	YES	0.709208
STM2243_NP_461186.1_-_2343920-2344711	0.183849	YES	0.669131
STM2287_NP_461229.1_+_2394795-2395748	0.109981	YES	0.609219
STM2315_NP_461257.1_-_2421685-2423466	0.022897	YES	0.53854
STM2329_NP_461271.1_-_2439893-2440045	0.0356732	YES	0.54901
STM2332_NP_461274.1_+_2443303-2443902	0.0383738	YES	0.551216
STM2338_NP_461280.1_+_2449218-2451362	0.15742	YES	0.647632
STM2343_NP_461285.1_-_2456334-2456606	0.117654	YES	0.615419
STM2371_NP_461313.1_+_2483595-2484596	0.227124	YES	0.704421
STM2391_NP_461333.1_+_2502389-2503702	0.0367296	YES	0.549873
STM2413_NP_461352.1_+_2529353-2529715	0.264541	YES	0.734818
STM2424_NP_461359.1_-_2536770-2537696	0.0979496	YES	0.5995
STM2431_NP_461366.1_+_2544586-2544843	0.021972	YES	0.53778
STM2436_NP_461371.1_+_2548503-2549795	0.0988356	YES	0.600216
STM2472_NP_461407.1_-_2579979-2582258	0.00460496	YES	0.52343
STM2475_NP_461410.1_-_2585563-2585793	0.0946751	YES	0.596855
STM2480_NP_461415.1_+_2591762-2593462	0.120722	YES	0.6179
STM2481_NP_461416.1_+_2593647-2596760	0.040679	YES	0.553097
STM2488_NP_461423.1_-_2602992-2604026	0.0239434	YES	0.5394
STM2506_NP_461441.1_+_2621211-2621402	0.0751584	YES	0.581083
STM2512_NP_461447.1_+_2626079-2627428	0.0616974	YES	0.570184
STM2513_NP_461448.1_-_2627589-2633708	0.0143545	YES	0.531503
STM2517_NP_461452.1_-_2648609-2650801	0.270432	YES	0.739574
STM2524_NP_461459.1_-_2657401-2658405	0.166874	YES	0.655315
STM2532_NP_461467.1_-_2667763-2672697	0.0282582	YES	0.542941
STM2556_NP_461491.1_+_2695259-2696449	0.0247362	YES	0.540051
STM2557_NP_461492.1_+_2696631-2698175	0.0297614	YES	0.544173
STM2565_NP_461500.1_-_2708254-2712141	0.0707251	YES	0.577496
STM2583_NP_461518.1_-_2726772-2728571	0.0565149	YES	0.56598
STM2584_NP_461519.1_+_2728976-2730469	0.107126	YES	0.606912
STM2585_NP_461520.1_+_2731356-2731901	0.085094	YES	0.589115
STM2586_NP_461522.1_-_2733337-2733915	0.141273	YES	0.634534
STM2589_NP_461525.1_-_2737516-2740794	0.150926	YES	0.642361
STM2594_NP_461530.1_-_2743185-2746280	0.257758	YES	0.729329
STM2607_NP_461543.1_-_2755399-2755602	0.0576406	YES	0.566894
STM2616_NP_461551.1_-_2762064-2762627	0.0505827	YES	0.561161
STM2622_NP_461557.1_-_2766074-2766367	0.164999	YES	0.65379
STM2627_NP_461562.1_-_2768928-2769302	0.0220302	YES	0.537827
STM2643_NP_461578.1_+_2782903-2784237	0.0390219	YES	0.551745
STM2648_NP_461583.1_-_2787413-2788450	0.0648144	YES	0.57271
STM2660_NP_461591.1_-_2802116-2804689	0.0418791	YES	0.554076
STM2665_NP_461595.1_+_2807668-2808006	0.198298	YES	0.68091
STM2681_NP_461611.1_-_2821587-2822177	0.0989935	YES	0.600343
STM2690_NP_461619.1_+_2839118-2840527	0.00745715	YES	0.525797
STM2697_NP_461625.1_-_2846293-2849100	0.085043	YES	0.589074
STM2703_NP_461631.1_+_2851911-2852990	0.1766	YES	0.663228
STM2711_NP_461639.1_-_2858062-2858508	0.0351034	YES	0.548544
STM2720_NP_461648.1_-_2861960-2863042	0.186958	YES	0.671665
STM2726_NP_461653.1_-_2868892-2869623	0.03539	YES	0.548779
STM2727_NP_461654.1_-_2869683-2869988	0.0907484	YES	0.593684
STM2731_NP_461658.1_-_2873542-2873769	0.0703309	YES	0.577177
STM2732_NP_461659.1_-_2873769-2874002	0.0266628	YES	0.541632
STM2733_NP_461660.1_-_2874070-2874411	0.0058087	YES	0.524429
STM2737_NP_461664.1_-_2875823-2876062	0.0385136	YES	0.55133
STM2738_NP_461665.1_+_2876179-2876811	0.103386	YES	0.603891
STM2761_NP_461688.1_+_2901480-2903354	0.232262	YES	0.708608
STM2771_NP_461698.1_-_2913230-2914750	0.526064	YES	0.913952
STM2777_NP_461704.1_-_2923589-2925769	0.0677906	YES	0.575121
STM2795_NP_461721.1_-_2945151-2945600	0.0575758	YES	0.566841
STM2808_NP_461734.1_+_2954637-2955596	0.0462629	YES	0.557647
STM2816_NP_461742.1_-_2964554-2965924	0.134984	YES	0.629439
STM2826_NP_461747.1_-_2970951-2971136	0.0204563	YES	0.536533
STM2865_NP_461786.1_-_3009898-3010806	0.0502254	YES	0.560871
STM2868_NP_461789.1_-_3013339-3013791	0.073005	YES	0.579341
STM2873_NP_461794.1_-_3016075-3016317	0.0886362	YES	0.591977
STM2874_NP_461795.1_-_3016342-3017520	0.087327	YES	0.59092
STM2875_NP_461796.1_+_3017836-3018765	0.201999	YES	0.683929
STM2878_NP_461799.1_-_3022071-3023702	0.348484	YES	0.800869
STM2882_NP_461803.1_-_3024679-3026736	0.302214	YES	0.764988
STM2883_NP_461804.1_-_3026755-3027786	0.652648	YES	0.962049
STM2884_NP_461805.1_-_3027857-3029086	0.691482	YES	0.971621
STM2885_NP_461806.1_-_3029114-3030895	0.00770105	YES	0.525999
STM2892_NP_461813.1_-_3035246-3036256	0.0182444	YES	0.534711
STM2897_NP_461818.1_-_3040482-3041600	0.520592	YES	0.911236
STM2900_NP_461821.1_+_3044389-3044832	0.257166	YES	0.72885
STM2904_NP_461825.1_+_3047332-3047622	0.346831	YES	0.799618
STM2908_NP_461829.1_-_3049599-3050120	0.130814	YES	0.626064
STM2919_NP_461840.1_+_3061824-3062588	0.263507	YES	0.733982
STM2925_NP_461846.1_-_3066549-3067682	0.776375	YES	0.985938
STM2945_NP_461866.1_+_3087148-3088101	0.156335	YES	0.646751
STM2961_NP_461882.1_-_3111900-3113240	0.0226556	YES	0.538342
STM3027_NP_461944.1_-_3187727-3188470	0.0480132	YES	0.559071
STM3034_NP_461951.1_-_3195554-3195781	0.127852	YES	0.623667
STM3038_NP_461954.1_-_3197575-3198333	0.0999338	YES	0.601103
STM3043_NP_461959.1_-_3203688-3204401	0.055668	YES	0.565293
STM3060_NP_461976.1_+_3221727-3222056	0.156554	YES	0.646929
STM3063_NP_461979.1_-_3224777-3225436	0.00719146	YES	0.525576
STM3069_NP_461985.1_-_3230692-3231855	0.0515486	YES	0.561946
STM3085_NP_462001.1_-_3248052-3248783	0.0241144	YES	0.53954
STM3102_NP_462018.1_+_3262230-3262520	0.0893181	YES	0.592528
STM3117_NP_462032.1_-_3276380-3276814	0.204059	YES	0.685609
STM3138_NP_462053.1_-_3300619-3301677	0.12549	YES	0.621756
STM3155_NP_462070.1_+_3317655-3318065	0.199886	YES	0.682205
STM3169_NP_462084.1_+_3331597-3332580	0.0151913	YES	0.532194
STM3186_NP_462101.1_+_3348567-3350042	0.0183918	YES	0.534833
STM3202_NP_462117.1_-_3367001-3368302	0.023567	YES	0.539091
STM3211.S_NP_462126.2_+_3376401-3378248	0.0868556	YES	0.590539
STM3228_NP_462142.1_+_3396388-3396756	0.136554	YES	0.630711
STM3240_NP_462154.1_-_3404998-3406362	0.176446	YES	0.663103
STM3266_NP_462179.1_+_3435744-3436334	0.0682239	YES	0.575472
STM3280.S_NP_462193.2_-_3446185-3448074	0.0213608	YES	0.537277
STM3291_NP_462203.1_-_3460352-3461416	0.00046937	YES	0.519991
STM3293_NP_462204.1_-_3461852-3462184	0.0351707	YES	0.548599
STM3300_NP_462211.1_+_3468654-3470087	0.0295539	YES	0.544003
STM3313_NP_462223.1_-_3478946-3479758	0.0623554	YES	0.570717
STM3320_NP_462230.1_+_3484410-3485843	0.144945	YES	0.63751
STM3348_NP_462258.1_+_3515417-3516784	0.106685	YES	0.606556
STM3358_NP_462268.1_-_3525927-3526556	0.0403319	YES	0.552814
STM3360_NP_462270.1_+_3528028-3528498	0.157516	YES	0.64771
STM3361_NP_462271.1_+_3528863-3529126	0.00689803	YES	0.525333
STM3362_NP_462272.1_+_3529230-3529496	0.00316177	YES	0.522231
STM3374_NP_462284.1_-_3543516-3544559	0.0234277	YES	0.538976
STM3379_NP_462289.1_+_3550095-3550565	0.0486673	YES	0.559604
STM3391_NP_462301.1_+_3562273-3565386	0.00456168	YES	0.523394
STM3421_NP_462325.1_-_3587366-3587800	0.037126	YES	0.550197
STM3429_NP_462333.1_-_3590714-3591028	0.148352	YES	0.640272
STM3432_NP_462336.1_-_3591828-3592019	0.0597344	YES	0.568592
STM3435_NP_462339.1_-_3593161-3593493	0.0354929	YES	0.548863
STM3439_NP_462343.1_-_3594941-3595546	0.0149038	YES	0.531956
STM3446_NP_462350.1_-_3599558-3601672	0.0631355	YES	0.57135
STM3454_NP_462358.1_+_3605909-3606127	0.267977	YES	0.737593
STM3465_NP_462368.1_-_3614933-3615337	0.0147274	YES	0.531811
STM3472_NP_462375.1_-_3621222-3621794	0.0974405	YES	0.599089
STM3478_NP_462381.1_+_3629167-3635028	0.192982	YES	0.676575
STM3506_NP_462409.1_+_3664136-3666454	0.0213177	YES	0.537241
STM3514_NP_462417.1_-_3673913-3676306	0.0823042	YES	0.586861
STM3515_NP_462418.1_+_3676900-3679605	0.117897	YES	0.615616
STM3523_NP_462425.1_-_3686448-3687206	0.146062	YES	0.638415
STM3547.Sc_NP_462448.2_+_3716637-3717584	0.0908945	YES	0.593802
STM3552_NP_462453.1_+_3722330-3722746	0.166192	YES	0.65476
STM3566_NP_462467.1_+_3734285-3734419	0.167616	YES	0.655919
STM3571_NP_462472.1_-_3738746-3740221	0.092338	YES	0.594968
STM3595_NP_462496.1_-_3766164-3767435	0.0155035	YES	0.532451
STM3598_NP_462499.1_-_3769992-3771035	0.0392809	YES	0.551956
STM3604_NP_462505.1_-_3777236-3778825	0.0610159	YES	0.569631
STM3607_NP_462508.1_+_3780701-3781600	0.00643712	YES	0.524951
STM3608_NP_462509.1_+_3781673-3782701	0.0179415	YES	0.534462
STM3618_NP_462519.1_-_3798531-3800831	0.149189	YES	0.640951
STM3622_NP_462523.1_+_3804664-3806235	0.072157	YES	0.578655
STM3633_NP_462535.1_+_3819242-3820249	0.0354827	YES	0.548854
STM3636_NP_462537.1_-_3822485-3823012	0.0698311	YES	0.576773
STM3638_NP_462539.1_-_3824115-3826643	0.105549	YES	0.605639
STM3639_NP_462540.1_-_3826666-3827364	0.15468	YES	0.645408
STM3640_NP_462541.1_-_3827449-3827985	0.047089	YES	0.558319
STM3650_NP_462551.1_+_3836825-3837364	0.161593	YES	0.651023
STM3657_NP_462557.1_-_3842899-3843201	0.0353021	YES	0.548707
STM3667_NP_462567.1_-_3854609-3855409	0.0614945	YES	0.57002
STM3673_NP_462573.1_+_3859973-3860959	0.165585	YES	0.654267
STM3680_NP_462580.1_-_3867973-3869511	0.170912	YES	0.6586
STM3701_NP_462601.1_-_3896036-3896503	0.103213	YES	0.603752
STM3705_NP_462605.1_+_3899118-3900401	0.00548707	YES	0.524162
STM3716_NP_462616.1_-_3911766-3912464	0.0186899	YES	0.535078
STM3717_NP_462617.1_-_3912487-3913497	0.148528	YES	0.640415
STM3720_NP_462620.1_-_3915683-3915916	0.150114	YES	0.641702
STM3723_NP_462623.1_-_3917859-3918893	0.0156603	YES	0.532581
STM3761_NP_462660.1_+_3959839-3960519	0.113281	YES	0.611885
STM3778_NP_462677.1_+_3979137-3979460	0.187171	YES	0.671839
STM3780_NP_462679.1_-_3979830-3980690	0.0765678	YES	0.582223
STM3783_NP_462682.1_-_3983664-3983951	0.135149	YES	0.629573
STM3826_NP_462726.1_+_4026452-4029187	0.138017	YES	0.631896
STM3834_NP_462734.1_+_4037940-4038836	0.0605022	YES	0.569215
STM3838_NP_462738.1_-_4043624-4045024	0.123026	YES	0.619763
STM3842_NP_462742.1_+_4046425-4048071	0.193128	YES	0.676694
STM3848_NP_462747.1_+_4055233-4056192	0.00890798	YES	0.526999
STM3854_NP_462753.1_-_4060740-4061513	0.0682892	YES	0.575524
STM3877_NP_462776.1_+_4085308-4086300	0.0246025	YES	0.539941
STM3886_NP_462785.1_+_4096544-4097542	0.144015	YES	0.636756
STM3899_NP_462790.1_-_4106863-4108383	0.126811	YES	0.622824
STM3902_NP_462793.1_+_4110619-4110879	0.114677	YES	0.613014
STM3905_NP_462796.1_+_4113840-4115384	0.0912851	YES	0.594117
STM3907_NP_462798.1_+_4115982-4116323	0.00687377	YES	0.525313
STM3913_NP_462804.1_-_4121827-4123308	0.177847	YES	0.664243
STM3936_NP_462822.1_-_4143121-4144290	0.113866	YES	0.612358
STM3946_NP_462831.1_+_4152022-4152225	0.283087	YES	0.749748
STM3964_NP_462849.1_-_4168560-4169513	0.062666	YES	0.570969
STM4003_NP_462883.1_+_4210467-4210982	0.161698	YES	0.651108
STM4006_NP_462886.1_-_4214275-4215324	0.00463091	YES	0.523452
STM4019_NP_462899.1_-_4228665-4230701	0.0278398	YES	0.542598
STM4028_NP_462908.1_+_4238211-4238648	0.0333353	YES	0.547099
STM4039_NP_462919.1_-_4249107-4250138	0.25302	YES	0.725488
STM4040_NP_462920.1_+_4250363-4251421	0.423375	YES	0.85432
STM4060_NP_462941.1_+_4270595-4271095	0.130306	YES	0.625652
STM4070_NP_462951.1_+_4280021-4280152	0.00690082	YES	0.525335
STM4074_NP_462955.1_+_4283501-4285036	0.0355647	YES	0.548921
STM4082_NP_462963.1_-_4291145-4291741	0.116666	YES	0.614621
STM4088_NP_462969.1_+_4297115-4297354	0.250163	YES	0.723169
STM4093_NP_462974.1_-_4301113-4302087	0.02209	YES	0.537877
STM4094_NP_462975.1_-_4302181-4303206	0.0017697	YES	0.521073
STM4098_NP_462979.1_-_4306884-4308674	0.0211396	YES	0.537095
STM4101_NP_462982.1_+_4310876-4313308	0.0614322	YES	0.569969
STM4105_NP_462986.1_+_4318528-4319418	0.253151	YES	0.725594
STM4119_NP_462999.1_-_4335253-4337904	0.191145	YES	0.675078
STM4149_NP_463018.1_+_4363105-4363533	0.0737053	YES	0.579908
STM4157_NP_463026.1_+_4375350-4376360	0.0380452	YES	0.550948
STM4158_NP_463027.1_+_4376683-4376871	0.0047458	YES	0.523547
STM4170_NP_463039.1_+_4386709-4386981	0.204038	YES	0.685592
STM4172_NP_463041.1_-_4387727-4388182	0.0107589	YES	0.528531
STM4191_NP_463056.1_+_4414757-4414858	0.387231	YES	0.829388
STM4192_NP_463057.1_+_4414893-4415432	0.103173	YES	0.603719
STM4194_NP_463059.1_-_4416345-4416617	0.0357134	YES	0.549043
STM4202_NP_463067.1_-_4422817-4423932	0.0523054	YES	0.562561
STM4222.S_NP_463087.2_+_4442255-4442497	0.628882	YES	0.95508
STM4232_NP_463097.1_+_4453601-4454518	0.305641	YES	0.767698
STM4245_NP_463110.1_-_4465543-4466526	0.0282823	YES	0.542961
STM4248_NP_463113.1_+_4469303-4470496	0.105108	YES	0.605282
STM4257_NP_463122.1_+_4477857-4478489	0.0115079	YES	0.529151
STM4259_NP_463124.1_+_4479864-4481183	0.255797	YES	0.72774
STM4261_NP_463126.1_+_4482474-4499153	0.334147	YES	0.789932
STM4262_NP_463127.1_+_4499193-4501259	0.0757729	YES	0.58158
STM4265_NP_463130.1_-_4503970-4504293	0.00406504	YES	0.522982
STM4276_NP_463141.1_+_4515859-4516005	0.0408358	YES	0.553225
STM4295_NP_463160.1_-_4537638-4538399	0.14686	YES	0.639063
STM4302_NP_463167.1_-_4548594-4548860	0.472054	YES	0.884816
STM4312_NP_463177.1_-_4560083-4560352	0.269069	YES	0.738474
STM4313_NP_463178.1_-_4560360-4560575	0.521592	YES	0.911736
STM4315_NP_463180.1_-_4560882-4561757	0.20549	YES	0.686776
STM4330_NP_463194.1_+_4575111-4576757	0.0928173	YES	0.595355
STM4336_NP_463200.1_+_4580479-4580625	0.0578766	YES	0.567085
STM4361_NP_463222.1_+_4604575-4604883	0.0858252	YES	0.589706
STM4367_NP_463228.1_+_4610601-4611026	0.0194097	YES	0.535671
STM4377_NP_463238.1_+_4619614-4621236	0.0328442	YES	0.546697
STM4378_NP_463239.1_-_4621281-4621601	0.0798263	YES	0.584858
STM4381_NP_463242.1_-_4622946-4623701	0.0298817	YES	0.544271
STM4390_NP_463251.1_+_4630237-4630443	0.0134952	YES	0.530793
STM4396_NP_463257.1_-_4633077-4633712	0.0832593	YES	0.587633
STM4401_NP_463262.1_-_4638180-4639028	0.0308759	YES	0.545086
STM4402_NP_463263.1_+_4639116-4639502	0.0883886	YES	0.591777
STM4409_NP_463270.1_+_4646053-4647786	0.218074	YES	0.697042
STM4417_NP_463278.1_+_4658541-4659374	0.1193	YES	0.61675
STM4439_NP_463300.1_+_4683278-4683664	0.0118978	YES	0.529473
STM4449_NP_463310.1_+_4691448-4691690	0.163073	YES	0.652225
STM4452.1N_NP_945171.1_+_4694896-4695066	0.209313	YES	0.689896
STM4455_NP_463315.1_-_4698357-4699304	0.13001	YES	0.625413
STM4460_NP_463320.1_-_4703970-4704905	0.0901781	YES	0.593223
STM4472_NP_463332.1_-_4714391-4714879	0.00317683	YES	0.522243
STM4481_NP_463341.1_-_4724731-4725729	0.0429744	YES	0.554968
STM4507_NP_463366.1_+_4761052-4761825	0.0765453	YES	0.582205
STM4508_NP_463367.1_-_4761826-4762839	0.0443444	YES	0.556085
STM4520_NP_463379.1_-_4775923-4776066	0.004437	YES	0.523291
STM4529_NP_463388.1_+_4785923-4786225	0.0153409	YES	0.532317
STM4539_NP_463398.1_+_4797476-4798537	0.0164059	YES	0.533196
STM4542_NP_463401.1_-_4802273-4802734	0.260313	YES	0.731398
STM4549_NP_463408.1_-_4807528-4807986	0.0678591	YES	0.575176
STM4561_NP_463417.1_+_4815879-4816496	0.0604208	YES	0.569149
STM4572_NP_463428.1_-_4826467-4828875	0.0223581	YES	0.538097
STM4575_NP_463431.1_-_4830411-4831100	0.0222813	YES	0.538034
STM4591_NP_463447.1_-_4847811-4848896	0.0321473	YES	0.546127
STM4593_NP_463449.1_-_4849512-4852049	0.0958341	YES	0.597792
STM4594_NP_463450.1_-_4852095-4852778	0.106056	YES	0.606048
STM4595_NP_463451.1_-_4852849-4853394	0.0371514	YES	0.550218
STM4597_NP_463453.1_-_4854789-4855103	0.184173	YES	0.669396
STM4599_NP_463455.1_+_4856182-4856322	0.0843546	YES	0.588518

## Sheet: DT104
Protein	Score	T3S protein or Not	Probability
SDT0001__+_169-255	0.539061	YES	0.920186
SDT0002__+_337-2799	0.0594316	YES	0.568347
SDT0004__+_3734-5020	0.0646997	YES	0.572617
SDT0011__-_10841-11245	0.117392	YES	0.615208
SDT0017__-_17043-17486	0.0672242	YES	0.574662
SDT0022__+_25112-25798	0.111241	YES	0.610237
SDT0025__+_29433-29978	0.0427243	YES	0.554765
SDT0033__-_34510-34815	0.161002	YES	0.650542
SDT0034__+_35338-37056	0.0746052	YES	0.580636
SDT0040__+_44311-46026	0.0532451	YES	0.563325
SDT0045__-_52279-52542	0.058684	YES	0.56774
SDT0083__+_93896-93958	0.259336	YES	0.730607
SDT0085__-_94774-95064	0.0395087	YES	0.552142
SDT0140__+_156938-157855	0.0408975	YES	0.553275
SDT0141__+_158203-158631	0.0908768	YES	0.593787
SDT0149__-_166323-167708	0.104114	YES	0.604479
SDT0159__+_178922-180811	0.184719	YES	0.669841
SDT0163__-_183850-185472	0.0508143	YES	0.56135
SDT0168__+_191154-192425	0.123167	YES	0.619877
SDT0197__+_223742-225931	0.0887688	YES	0.592084
SDT0201__+_230661-231221	0.0399241	YES	0.552481
SDT0208__-_237215-238495	0.00102043	YES	0.52045
SDT0214__+_242849-244366	0.00162689	YES	0.520954
SDT0215__+_244496-245923	0.2134	YES	0.69323
SDT0225__+_257152-257709	0.0535895	YES	0.563605
SDT0231__+_264920-265405	0.024163	YES	0.53958
SDT0239__+_274186-275949	0.0387515	YES	0.551524
SDT0250__-_284999-285403	0.230639	YES	0.707286
SDT0253__-_287022-288053	0.210115	YES	0.69055
SDT0256__-_295892-296806	0.0592545	YES	0.568203
SDT0258__+_298239-299018	0.0357699	YES	0.549089
SDT0259__+_299096-299866	0.0592067	YES	0.568164
SDT0260__-_299922-301289	0.0208268	YES	0.536838
SDT0268__-_308621-309115	0.0373477	YES	0.550378
SDT0276__+_316892-317377	0.040946	YES	0.553315
SDT0279__+_318678-319163	0.0598515	YES	0.568687
SDT0281__+_319770-321113	0.0838242	YES	0.588089
SDT0282__+_321110-322414	0.0843282	YES	0.588496
SDT0284__+_323395-323826	0.00701185	YES	0.525427
SDT0289__+_329872-332061	0.17819	YES	0.664523
SDT0290__+_332085-332531	0.196758	YES	0.679654
SDT0300__+_338928-339440	0.0958399	YES	0.597796
SDT0305__-_344396-345007	0.199729	YES	0.682077
SDT0306__+_345329-346276	0.0456167	YES	0.557121
SDT0324__+_364149-365399	0.0832687	YES	0.58764
SDT0336__-_375988-376677	0.260728	YES	0.731734
SDT0350__+_391979-393271	0.0324937	YES	0.54641
SDT0358__+_399033-401009	0.0740034	YES	0.580149
SDT0367__+_408848-409171	0.11485	YES	0.613153
SDT0377__-_417814-419139	0.00253052	YES	0.521706
SDT0380__-_422512-423048	0.0375954	YES	0.55058
SDT0388__+_429819-430043	0.170438	YES	0.658213
SDT0389__+_430101-430460	0.0990518	YES	0.60039
SDT0392__-_435168-436394	0.0502778	YES	0.560913
SDT0394__+_438971-439435	0.123578	YES	0.620209
SDT0398__+_443410-446382	0.0312858	YES	0.545421
SDT0432__-_481040-481951	0.0644054	YES	0.572379
SDT0493__+_547490-549361	0.0290049	YES	0.543553
SDT0506__+_562179-562748	0.037732	YES	0.550692
SDT0508__-_563401-564951	0.00933912	YES	0.527356
SDT0519__-_576754-577926	0.032485	YES	0.546403
SDT0524__+_581681-582034	0.0268867	YES	0.541816
SDT0555__+_615389-616207	0.154857	YES	0.645552
SDT0556__+_616292-616984	0.0487894	YES	0.559703
SDT0566__-_625235-625672	0.197462	YES	0.680229
SDT0572__+_629175-629867	0.0683458	YES	0.57557
SDT0578__-_636083-636394	0.0807832	YES	0.585631
SDT0582__-_638049-638267	0.345142	YES	0.798336
SDT0590__+_645660-645896	0.095853	YES	0.597807
SDT0605__-_661996-662577	0.0043861	YES	0.523248
SDT0609__-_665408-667663	0.211162	YES	0.691404
SDT0630__-_691893-692795	0.0787005	YES	0.583948
SDT0631__-_693112-693858	0.00133998	YES	0.520716
SDT0640__-_703194-703604	0.111519	YES	0.610461
SDT0661__-_722251-723462	0.0573196	YES	0.566633
SDT0679__-_741717-741923	0.0443656	YES	0.556102
SDT0700__-_765542-766762	0.0533771	YES	0.563432
SDT0715__+_783041-783583	0.0271149	YES	0.542003
SDT0740__+_811961-812671	0.134372	YES	0.628943
SDT0743__+_815627-817522	0.0650356	YES	0.572889
SDT0767__+_841675-842463	0.182859	YES	0.668326
SDT0771__-_846761-847147	0.348272	YES	0.800709
SDT0797__-_874016-875299	0.206995	YES	0.688004
SDT0810__+_890460-890633	0.122659	YES	0.619466
SDT0811__+_890641-892938	0.509871	YES	0.90576
SDT0812__-_893030-893938	0.060883	YES	0.569524
SDT0834__-_914159-914419	0.0751741	YES	0.581096
SDT0837__-_916098-918320	0.353604	YES	0.804729
SDT0866__+_951176-952123	0.0353354	YES	0.548734
SDT0869__-_955720-956610	0.0637742	YES	0.571867
SDT0920__-_1008653-1009330	0.0622003	YES	0.570592
SDT0929__+_1017716-1018210	0.0132499	YES	0.530591
SDT0932__+_1023164-1024507	0.0374143	YES	0.550432
SDT0989__+_1089693-1089986	0.098217	YES	0.599716
SDT0996__+_1093837-1093962	0.162431	YES	0.651703
SDT0997__-_1094098-1094547	0.221619	YES	0.699934
SDT1002__+_1097340-1097873	0.0583308	YES	0.567454
SDT1005__+_1101639-1103720	0.177661	YES	0.664092
SDT1021__+_1113750-1114643	0.132608	YES	0.627515
SDT1023__+_1117140-1117382	0.163827	YES	0.652837
SDT1025__+_1119874-1120455	0.158745	YES	0.648708
SDT1033__-_1123526-1124212	0.27128	YES	0.740257
SDT1059__+_1153132-1153680	0.0294458	YES	0.543914
SDT1060__+_1153706-1154485	0.125012	YES	0.621369
SDT1066__+_1158503-1158823	0.063825	YES	0.571908
SDT1068__-_1159191-1160876	0.125834	YES	0.622034
SDT1069__+_1161208-1161378	0.00340354	YES	0.522432
SDT1070__-_1161379-1161489	0.107358	YES	0.6071
SDT1076__-_1166686-1168248	0.0788536	YES	0.584071
SDT1079__+_1170467-1171933	0.00332156	YES	0.522364
SDT1082__+_1173319-1174122	0.00781171	YES	0.526091
SDT1089__-_1180999-1181436	0.071937	YES	0.578477
SDT1096__+_1187164-1187331	0.454579	YES	0.874308
SDT1113__-_1208803-1209549	0.0424071	YES	0.554506
SDT1119__+_1212925-1213251	0.231344	YES	0.707861
SDT1120__+_1213382-1213702	0.0179123	YES	0.534438
SDT1124__+_1217196-1218731	0.0565983	YES	0.566048
SDT1131__-_1225638-1226213	0.0302591	YES	0.544581
SDT1142__+_1233905-1234552	0.056769	YES	0.566186
SDT1146__-_1237825-1238118	0.274174	YES	0.742588
SDT1150__+_1239862-1240560	0.298602	YES	0.762125
SDT1151__+_1240587-1241798	0.0732947	YES	0.579576
SDT1152__+_1241819-1242574	0.0460762	YES	0.557495
SDT1153__+_1242588-1243370	0.105722	YES	0.605778
SDT1156__+_1245232-1246182	0.0375101	YES	0.550511
SDT1157__+_1246247-1247908	0.112803	YES	0.611499
SDT1158__+_1247923-1248876	0.176021	YES	0.662756
SDT1160__+_1252472-1252720	0.0973356	YES	0.599004
SDT1189__+_1278207-1278464	0.0425634	YES	0.554633
SDT1218__-_1310676-1311197	0.114622	YES	0.612969
SDT1220__-_1311956-1312219	0.123904	YES	0.620473
SDT1241__-_1330074-1330322	0.0867071	YES	0.590419
SDT1252__+_1337881-1338327	0.116958	YES	0.614857
SDT1255__-_1341200-1342486	0.0777859	YES	0.583208
SDT1280__+_1369338-1369823	0.143038	YES	0.635964
SDT1281__+_1369338-1369823	0.143038	YES	0.635964
SDT1291__-_1378606-1380858	0.389105	YES	0.830723
SDT1301__-_1388610-1389569	0.089073	YES	0.59233
SDT1303__+_1390041-1390877	0.0848861	YES	0.588947
SDT1310__+_1397170-1398153	0.106025	YES	0.606023
SDT1319__-_1406542-1406733	0.0780267	YES	0.583403
SDT1344__+_1435687-1436433	0.0422462	YES	0.554375
SDT1349__-_1440548-1440787	0.183156	YES	0.668567
SDT1350__-_1440870-1441106	0.0646829	YES	0.572604
SDT1369__+_1465108-1465434	0.362871	YES	0.811649
SDT1370__+_1465441-1466031	0.0134693	YES	0.530772
SDT1372__+_1466504-1467958	0.397951	YES	0.836967
SDT1373__+_1467974-1468561	0.134662	YES	0.629178
SDT1376__+_1469482-1470264	0.0966171	YES	0.598424
SDT1377__+_1470261-1470950	0.072642	YES	0.579048
SDT1378__+_1471044-1471259	0.266932	YES	0.736749
SDT1379__+_1471539-1471787	0.132028	YES	0.627046
SDT1382__+_1473096-1473770	0.0826065	YES	0.587105
SDT1383__+_1473736-1474752	0.109094	YES	0.608502
SDT1399__-_1489427-1490452	0.029379	YES	0.543859
SDT1401__-_1491628-1492482	0.517061	YES	0.909455
SDT1457__-_1549939-1551087	0.07435	YES	0.580429
SDT1466__-_1560963-1561271	0.154027	YES	0.644877
SDT1469__-_1562722-1563063	0.0138307	YES	0.53107
SDT1479__+_1573490-1573672	0.320171	YES	0.779104
SDT1531__+_1625776-1625919	0.0126268	YES	0.530076
SDT1554__+_1654196-1656316	0.120771	YES	0.61794
SDT1555__-_1656383-1657048	0.0313891	YES	0.545506
SDT1587__-_1688128-1689330	0.17265	YES	0.660013
SDT1588__-_1689342-1689917	0.148848	YES	0.640675
SDT1596__+_1699907-1700308	0.175728	YES	0.662519
SDT1598__+_1701579-1702805	0.0685063	YES	0.5757
SDT1621__+_1727595-1728530	0.0923509	YES	0.594978
SDT1622__-_1728574-1729947	0.0179278	YES	0.53445
SDT1634__-_1740635-1741465	0.0430878	YES	0.555061
SDT1636__-_1743543-1744388	0.0900791	YES	0.593143
SDT1644__+_1751257-1752186	0.0350361	YES	0.548489
SDT1665__+_1771850-1772029	0.167708	YES	0.655993
SDT1666__+_1772004-1772303	0.0361959	YES	0.549437
SDT1679__-_1788692-1789666	0.0636426	YES	0.571761
SDT1694__+_1805843-1806025	0.278743	YES	0.746263
SDT1695__+_1806115-1806618	0.00784943	YES	0.526122
SDT1712__-_1819893-1821641	0.0893757	YES	0.592575
SDT1817__-_1932837-1933559	0.365003	YES	0.813228
SDT1819__+_1934666-1934836	0.152933	YES	0.64399
SDT1822A__+_1936874-1937026	0.104435	YES	0.604739
SDT1823__+_1937033-1937308	0.171302	YES	0.658917
SDT1824__+_1937033-1937308	0.171302	YES	0.658917
SDT1834__-_1945337-1945600	0.161885	YES	0.651259
SDT1835__+_1945908-1946075	0.0719782	YES	0.57851
SDT1838__+_1947339-1947833	0.034592	YES	0.548126
SDT1841__+_1951060-1951959	0.124087	YES	0.620621
SDT1844__-_1954176-1954751	0.158745	YES	0.648708
SDT1847__-_1956796-1958037	0.208437	YES	0.689181
SDT1850__-_1960229-1960939	0.183293	YES	0.668678
SDT1851__-_1960936-1963107	0.228148	YES	0.705256
SDT1862__-_1973019-1974440	0.0643769	YES	0.572356
SDT1872__+_1983021-1983524	0.0355305	YES	0.548893
SDT1876__+_1986183-1986581	0.0642978	YES	0.572292
SDT1886__-_1997022-1997396	0.0195852	YES	0.535816
SDT1899__+_2009957-2011399	0.139023	YES	0.632711
SDT1905__-_2016534-2017463	0.119549	YES	0.616952
SDT1956__+_2066695-2066850	0.155085	YES	0.645736
SDT1957__+_2066847-2067071	0.33549	YES	0.790964
SDT1967__-_2075138-2076625	0.385139	YES	0.827892
SDT1968__+_2076882-2078285	0.457064	YES	0.875833
SDT1978__+_2085694-2086689	0.141547	YES	0.634756
SDT2009__+_2110544-2110756	0.182835	YES	0.668305
SDT2021__-_2120928-2121221	0.000856897	YES	0.520314
SDT2042__-_2136083-2136988	0.114505	YES	0.612875
SDT2046__-_2138723-2139541	0.0478657	YES	0.558951
SDT2049__+_2141818-2142513	0.116617	YES	0.614582
SDT2051__+_2144213-2145040	0.000694017	YES	0.520178
SDT2059__+_2151401-2151874	0.238523	YES	0.713707
SDT2096__+_2187265-2187786	0.274396	YES	0.742767
SDT2100__+_2190748-2191380	0.00674181	YES	0.525203
SDT2103__+_2192157-2193167	0.00641835	YES	0.524935
SDT2120__+_2208513-2210861	0.484806	YES	0.892157
SDT2126__+_2217560-2218864	0.0314386	YES	0.545546
SDT2142__-_2235273-2236274	0.112371	YES	0.61115
SDT2145__-_2238580-2239893	0.12179	YES	0.618764
SDT2160__-_2256155-2257597	0.00147367	YES	0.520827
SDT2169__-_2263921-2265138	0.00443758	YES	0.523291
SDT2172__-_2266555-2268714	1.92855e-05	YES	0.519616
SDT2192__+_2299151-2300197	0.154184	YES	0.645005
SDT2206__-_2314013-2314696	0.199661	YES	0.682022
SDT2208__-_2315561-2315842	0.00440197	YES	0.523261
SDT2224__-_2333180-2334088	0.108151	YES	0.60774
SDT2245__-_2352450-2353970	0.13156	YES	0.626667
SDT2261__-_2372773-2373630	0.0424008	YES	0.554501
SDT2274__+_2387642-2389231	0.110522	YES	0.609656
SDT2287__-_2401493-2401936	0.265976	YES	0.735978
SDT2298__-_2411400-2412191	0.169186	YES	0.657195
SDT2341__+_2462275-2463228	0.141526	YES	0.634739
SDT2381__-_2507373-2507525	0.0240547	YES	0.539491
SDT2384__+_2510783-2511382	0.03759	YES	0.550576
SDT2390__+_2516698-2518842	0.131493	YES	0.626613
SDT2395__-_2523814-2524086	0.0684583	YES	0.575661
SDT2418__-_2546170-2547084	0.0165989	YES	0.533355
SDT2423__+_2551075-2552076	0.0865318	YES	0.590277
SDT2452__+_2581174-2581302	0.0631586	YES	0.571368
SDT2465__+_2596833-2597195	0.256601	YES	0.728392
SDT2480__+_2612065-2612322	0.027664	YES	0.542454
SDT2485__+_2615982-2617274	0.0198497	YES	0.536033
SDT2524__-_2653042-2653272	0.0800078	YES	0.585005
SDT2549__+_2683127-2685193	0.00276845	YES	0.521904
SDT2554__+_2689401-2689592	0.0243712	YES	0.539751
SDT2560__+_2694269-2695618	0.0187019	YES	0.535088
SDT2561__-_2695780-2701899	0.0435195	YES	0.555413
SDT2565__-_2716800-2718992	0.243078	YES	0.717412
SDT2572__-_2725592-2726596	0.132644	YES	0.627544
SDT2613__-_2776446-2780333	0.052244	YES	0.562512
SDT2631__+_2797168-2798661	0.0653864	YES	0.573174
SDT2632__+_2799572-2800117	0.0794304	YES	0.584538
SDT2636__-_2801553-2802131	0.127536	YES	0.623411
SDT2639__-_2805368-2805610	0.194577	YES	0.677876
SDT2645__-_2811402-2814497	0.205815	YES	0.687042
SDT2657__-_2822284-2822487	0.0401692	YES	0.552681
SDT2670__-_2832323-2833228	0.0928841	YES	0.595409
SDT2678__+_2838183-2838878	0.165013	YES	0.653802
SDT2693__+_2851837-2853171	0.0439178	YES	0.555737
SDT2698__-_2856347-2857384	0.0586802	YES	0.567737
SDT2706__-_2871049-2873622	0.0337673	YES	0.547452
SDT2710__+_2876601-2876939	0.101889	YES	0.602682
SDT2725__-_2890520-2891110	0.102033	YES	0.602798
SDT2734__+_2908052-2909461	0.0396716	YES	0.552275
SDT2759__+_2936721-2938595	0.192385	YES	0.676088
SDT2769__-_2948471-2949991	0.385139	YES	0.827892
SDT2775__-_2958830-2961010	0.0422336	YES	0.554365
SDT2778__+_2963167-2963505	0.0352851	YES	0.548693
SDT2793__-_2980392-2980841	0.0820202	YES	0.586631
SDT2814__-_2999795-3001165	0.113992	YES	0.61246
SDT2861__-_3048583-3049035	0.0164811	YES	0.533258
SDT2867__-_3051586-3052764	0.049141	YES	0.559989
SDT2868__+_3053080-3054009	0.166564	YES	0.655063
SDT2871__-_3057315-3058946	0.308275	YES	0.769776
SDT2875__-_3059923-3061980	0.199303	YES	0.68173
SDT2876__-_3061999-3063030	0.53127	YES	0.916485
SDT2877__-_3063101-3064330	0.594716	YES	0.943456
SDT2885__-_3070490-3071500	0.028066	YES	0.542783
SDT2890__-_3075726-3076844	0.456177	YES	0.875289
SDT2893__+_3079633-3080076	0.201033	YES	0.683141
SDT2898__+_3082576-3082866	0.298868	YES	0.762336
SDT2902__-_3084843-3085364	0.0613892	YES	0.569934
SDT2913__+_3097068-3097832	0.150215	YES	0.641784
SDT2919__-_3101793-3102926	0.526703	YES	0.914266
SDT2939__+_3121494-3122447	0.187041	YES	0.671733
SDT2954__-_3144518-3145858	0.0345998	YES	0.548133
SDT2978__+_3169934-3171139	0.0212654	YES	0.537198
SDT3003__+_3204194-3204568	0.020322	YES	0.536422
SDT3027__-_3228820-3229047	0.0520815	YES	0.562379
SDT3030__-_3230841-3231599	0.0969844	YES	0.598721
SDT3052__+_3254993-3255322	0.114155	YES	0.612592
SDT3061__-_3262777-3263856	0.0188011	YES	0.53517
SDT3062__-_3263958-3265121	0.0665392	YES	0.574107
SDT3095__+_3295488-3295778	0.118951	YES	0.616468
SDT3109__-_3309638-3310072	0.275062	YES	0.743303
SDT3130__-_3333877-3334935	0.127563	YES	0.623433
SDT3147__+_3350913-3351323	0.183743	YES	0.669046
SDT3161__+_3364856-3365839	0.0889865	YES	0.59226
SDT3178__+_3381826-3383301	0.012075	YES	0.52962
SDT3220__+_3429648-3430016	0.128863	YES	0.624484
SDT3231__-_3438258-3439622	0.170704	YES	0.65843
SDT3257__+_3469004-3469594	0.00987328	YES	0.527798
SDT3289__+_3501914-3503347	0.000623443	YES	0.520119
SDT3302__-_3512207-3513019	0.0383964	YES	0.551234
SDT3309__+_3517671-3519104	0.103196	YES	0.603738
SDT3337__+_3548678-3550045	0.029984	YES	0.544355
SDT3348__+_3561292-3561762	0.193369	YES	0.676891
SDT3349__+_3562127-3562390	0.00332656	YES	0.522368
SDT3362__-_3576780-3577823	0.111795	YES	0.610685
SDT3377__-_3593292-3593420	0.100082	YES	0.601223
SDT3404__-_3620691-3621125	0.108214	YES	0.607792
SDT3412__-_3624039-3624353	0.141792	YES	0.634954
SDT3428__-_3632883-3634997	0.0979528	YES	0.599503
SDT3436__+_3639234-3639452	0.218211	YES	0.697154
SDT3453__-_3654548-3655120	0.131181	YES	0.626361
SDT3459__+_3662496-3668384	0.167926	YES	0.656171
SDT3486__+_3697495-3699813	0.0188824	YES	0.535237
SDT3495__+_3710259-3712964	0.0966448	YES	0.598446
SDT3502__-_3719607-3720365	0.0334105	YES	0.54716
SDT3526__+_3749531-3750745	0.0836772	YES	0.58797
SDT3545__+_3767446-3767580	0.212904	YES	0.692825
SDT3550__-_3771907-3773382	0.0226448	YES	0.538333
SDT3574__-_3799328-3800599	0.0283345	YES	0.543003
SDT3583__-_3810400-3811989	0.0398328	YES	0.552407
SDT3601__+_3837828-3839399	0.00680161	YES	0.525253
SDT3617__-_3856360-3856887	0.0701682	YES	0.577046
SDT3619__-_3857990-3860518	0.0638533	YES	0.571931
SDT3620__-_3860541-3861239	0.110052	YES	0.609277
SDT3621__-_3861324-3861860	0.0754177	YES	0.581293
SDT3637__-_3876774-3877076	0.0496346	YES	0.56039
SDT3646__-_3888484-3889284	0.00806075	YES	0.526297
SDT3652__+_3893848-3894834	0.0879585	YES	0.59143
SDT3659__-_3901848-3903386	0.0814204	YES	0.586146
SDT3669__+_3914376-3915059	0.0593387	YES	0.568271
SDT3697__-_3946362-3947372	0.0886596	YES	0.591996
SDT3700__-_3949558-3949791	0.199095	YES	0.68156
SDT3703__-_3951734-3952768	0.00564871	YES	0.524297
SDT3716__-_3962309-3963166	0.00340419	YES	0.522432
SDT3740__-_3992983-3993096	0.127768	YES	0.623599
SDT3741__+_3993714-3994394	0.0402224	YES	0.552724
SDT3758__+_4013012-4013335	0.0744456	YES	0.580507
SDT3760__-_4013705-4014565	0.0602857	YES	0.569039
SDT3763__-_4017539-4017826	0.108608	YES	0.60811
SDT3807__+_4060327-4063062	0.0263016	YES	0.541336
SDT3816__+_4071816-4072712	0.0627001	YES	0.570997
SDT3820__-_4077500-4078900	0.000548708	YES	0.520057
SDT3824__+_4080301-4081947	0.00195647	YES	0.521229
SDT3830__-_4086915-4089674	0.34127	YES	0.795389
SDT3837__+_4096954-4097811	0.210464	YES	0.690834
SDT3839__+_4099010-4099264	0.00569371	YES	0.524334
SDT3841__-_4100036-4101001	0.0325206	YES	0.546432
SDT3847__-_4108202-4109191	0.0299741	YES	0.544347
SDT3869__+_4131541-4132500	0.0211476	YES	0.537101
SDT3875__-_4137048-4137821	0.0694882	YES	0.576495
SDT3906__+_4172852-4173850	0.134535	YES	0.629075
SDT3911__-_4183169-4184689	0.122233	YES	0.619122
SDT3913__+_4186925-4187185	0.0956179	YES	0.597617
SDT3916__+_4190146-4191690	0.00829337	YES	0.52649
SDT3918__+_4192288-4192629	0.10782	YES	0.607473
SDT3925__-_4198133-4199614	0.0142933	YES	0.531452
SDT3928__+_4201890-4203149	0.0285582	YES	0.543187
SDT3943__-_4219427-4220596	0.0567357	YES	0.566159
SDT3953__+_4228328-4228531	0.173397	YES	0.660621
SDT4003__+_4286666-4287181	0.204663	YES	0.686102
SDT4028__+_4314410-4314847	0.0173327	YES	0.53396
SDT4039__-_4325306-4326337	0.159487	YES	0.649311
SDT4040__+_4326562-4327620	0.176921	YES	0.66349
SDT4062__+_4347505-4348005	0.0908811	YES	0.593791
SDT4076__+_4360411-4361946	0.00113538	YES	0.520545
SDT4084__-_4368055-4368651	0.0965451	YES	0.598366
SDT4090__+_4374025-4374264	0.168468	YES	0.656611
SDT4108__+_4395438-4396328	0.214988	YES	0.694525
SDT4121__-_4412163-4414814	0.183564	YES	0.668899
SDT4139__+_4440011-4440439	0.0836494	YES	0.587948
SDT4147__+_4452256-4453266	0.0363622	YES	0.549573
SDT4160__+_4463615-4463887	0.0738413	YES	0.580018
SDT4168__+_4477746-4478675	0.031864	YES	0.545895
SDT4177__+_4491662-4491763	0.415162	YES	0.848814
SDT4178__+_4491798-4492337	0.0852718	YES	0.589259
SDT4188__-_4499722-4500837	0.0446815	YES	0.556359
SDT4209__+_4519158-4519403	0.588856	YES	0.941263
SDT4219__+_4530507-4531424	0.215813	YES	0.695198
SDT4235__+_4546210-4547403	0.0151145	YES	0.53213
SDT4243__+_4553070-4553723	0.0584093	YES	0.567517
SDT4247__+_4556771-4558090	0.198125	YES	0.680769
SDT4249__+_4559381-4576060	0.315968	YES	0.775819
SDT4250__+_4576100-4578166	0.133529	YES	0.628261
SDT4283__-_4614545-4615306	0.11959	YES	0.616984
SDT4290__-_4625501-4625767	0.398274	YES	0.837193
SDT4299__-_4636278-4636547	0.238424	YES	0.713626
SDT4300__-_4636555-4636770	0.521592	YES	0.911736
SDT4302__-_4637077-4637952	0.0734434	YES	0.579696
SDT4316__+_4651306-4652952	0.110255	YES	0.60944
SDT4317__+_4653178-4653549	0.00916869	YES	0.527215
SDT4321__+_4656674-4656820	0.0439215	YES	0.55574
SDT4343__+_4680770-4681078	0.199238	YES	0.681677
SDT4348__+_4686795-4687220	0.0145647	YES	0.531677
SDT4359__-_4697475-4697795	0.0827299	YES	0.587205
SDT4383__+_4715310-4715696	0.0498173	YES	0.560539
SDT4390__+_4722247-4723980	0.122368	YES	0.619231
SDT4398__+_4734735-4735568	0.0807985	YES	0.585644
SDT4403__-_4741655-4741957	0.00676508	YES	0.525223
SDT4410__-_4748611-4750548	0.0409042	YES	0.553281
SDT4418__+_4759474-4759860	0.0208668	YES	0.53687
SDT4419__+_4759474-4759860	0.0208668	YES	0.53687
SDT4430__+_4767645-4767887	0.0777872	YES	0.583209
SDT4434__+_4771093-4771260	0.225439	YES	0.703048
SDT4437__-_4774554-4775501	0.0740489	YES	0.580186
SDT4442__-_4780167-4781102	0.0292443	YES	0.543749
SDT4444__+_4781219-4781359	0.010642	YES	0.528434
SDT4490__+_4837249-4838022	0.00589452	YES	0.524501
SDT4504__-_4852120-4852263	0.004437	YES	0.523291
SDT4525__-_4878470-4878931	0.248011	YES	0.721422
SDT4532__-_4883725-4884183	0.0574984	YES	0.566778
SDT4541__+_4892076-4892693	0.05288	YES	0.563028
SDT4550__-_4902095-4902667	0.0555731	YES	0.565215
SDT4552__-_4903734-4905080	0.0148169	YES	0.531885
SDT4573__-_4925711-4928248	0.083403	YES	0.587749
SDT4574__-_4928294-4928977	0.0852628	YES	0.589252
SDT4575__-_4929048-4929593	0.011005	YES	0.528735
SDT4579__+_4932381-4932521	0.0843546	YES	0.588518

## Sheet: CT18
Protein	Score	T3S protein or Not	Probability
STY0001_NP_454611.1_+_190-255	0.445866	YES	0.868881
STY0002_NP_454612.1_+_337-2799	0.0980702	YES	0.599598
STY0004_NP_454614.1_+_3734-5020	0.0158782	YES	0.532761
STY0011_NP_454621.1_-_10841-11245	0.18762	YES	0.672205
STY0017_NP_454627.1_-_17049-17492	0.135405	YES	0.62978
STY0019_NP_454629.1_+_20004-21155	0.140124	YES	0.633603
STY0025_NP_454633.1_+_25116-25802	0.20988	YES	0.690358
STY0030_NP_454635.1_+_29437-29982	0.0582534	YES	0.567391
STY0033_NP_454638.1_+_31278-32123	0.0092188	YES	0.527256
STY0038_NP_454642.1_-_34511-34816	0.0787196	YES	0.583963
STY0039_NP_454643.1_+_35339-37057	0.0930077	YES	0.595509
STY0046_NP_454649.1_+_44308-46023	0.019046	YES	0.535372
STY0052_NP_454654.1_-_52277-52540	0.184337	YES	0.669529
STY0095_NP_454692.1_-_94586-94876	0.0170715	YES	0.533745
STY0108_NP_454705.1_-_105614-107968	0.0118464	YES	0.529431
STY0130_NP_454723.1_-_131087-132487	0.0312346	YES	0.545379
STY0132_NP_454725.1_-_133581-135152	0.0134281	YES	0.530738
STY0154_NP_454746.1_+_158349-159266	0.0645052	YES	0.57246
STY0155_NP_454747.1_+_159617-160045	0.150365	YES	0.641906
STY0165_NP_454757.1_-_169466-170851	0.118936	YES	0.616456
STY0176_NP_454767.1_+_182065-183954	0.221568	YES	0.699891
STY0180_NP_454771.1_-_186995-188617	0.163229	YES	0.652351
STY0184_NP_454775.1_+_193338-194609	0.128562	YES	0.624241
STY0186_NP_454777.1_+_195592-196359	0.0130269	YES	0.530406
STY0187_NP_454778.1_-_196389-197183	0.045035	YES	0.556647
STY0201_NP_454792.1_-_210264-211439	0.0636967	YES	0.571804
STY0204_NP_454795.1_-_212695-213261	0.109107	YES	0.608513
STY0205_NP_454796.1_-_213248-215839	0.154979	YES	0.645651
STY0206_NP_454797.1_-_215914-216648	0.00733293	YES	0.525694
STY0208_NP_454799.1_-_217806-218285	0.0186876	YES	0.535076
STY0223_NP_454810.1_-_234219-235499	0.00102043	YES	0.52045
STY0230_NP_454816.1_+_239853-241370	0.00993036	YES	0.527845
STY0231_NP_454817.1_+_241500-242927	0.107229	YES	0.606996
STY0242_NP_454826.1_+_254032-254589	0.119468	YES	0.616886
STY0248_NP_454832.1_+_261798-262283	0.161178	YES	0.650685
STY0257_NP_454841.1_+_271774-273537	0.0790733	YES	0.584249
STY0271_NP_454853.1_-_283298-283702	0.246097	YES	0.719867
STY0274_NP_454856.1_-_285321-286352	0.167311	YES	0.65567
STY0277_NP_454859.1_-_293718-294632	0.0880895	YES	0.591536
STY0280_NP_454862.1_+_296922-297692	0.0810316	YES	0.585832
STY0281_NP_454863.1_-_297748-299115	0.0380239	YES	0.55093
STY0290_NP_454872.1_-_306444-306938	0.102704	YES	0.603341
STY0302_NP_454882.1_+_315281-315766	0.0389926	YES	0.551721
STY0305_NP_454885.1_+_317713-319014	0.109171	YES	0.608564
STY0313_NP_454891.1_+_326234-326704	0.08505	YES	0.58908
STY0319_NP_454896.1_+_328636-330825	0.162601	YES	0.651842
STY0320_NP_454897.1_+_330849-331295	0.215137	YES	0.694647
STY0322_NP_454899.1_+_335381-336058	0.127291	YES	0.623213
STY0323_NP_454900.1_+_336077-336370	0.0803907	YES	0.585314
STY0326_NP_454902.1_+_339076-339336	0.269734	YES	0.73901
STY0332_NP_454905.1_+_341669-342163	0.0167487	YES	0.533478
STY0335_NP_454906.1_+_342869-343609	0.0814134	YES	0.586141
STY0341_NP_454910.1_+_348682-349626	0.0741707	YES	0.580284
STY0346_NP_454913.1_+_352525-353100	0.104056	YES	0.604433
STY0357_NP_454924.1_-_366107-366847	0.0665055	YES	0.57408
STY0369_NP_454936.1_-_378844-379602	0.0561041	YES	0.565647
STY0370_NP_454937.1_-_379568-380893	0.0162453	YES	0.533063
STY0372_NP_454939.1_-_383443-384204	0.0394221	YES	0.552071
STY0378_NP_454945.1_+_389375-389923	0.0384567	YES	0.551284
STY0382_NP_454948.1_+_391586-391810	0.0366283	YES	0.54979
STY0383_NP_454949.1_+_391868-392227	0.133755	YES	0.628444
STY0394_NP_454957.1_+_402769-402993	0.0504719	YES	0.561071
STY0409_NP_454972.1_+_423107-424201	0.0543803	YES	0.564247
STY0417_NP_454979.1_+_429218-429538	0.0249447	YES	0.540222
STY0425_NP_454987.1_-_434430-435275	0.136289	YES	0.630496
STY0450_NP_455007.1_-_459365-459691	0.0586134	YES	0.567683
STY0452_NP_455009.1_-_460908-461447	0.00503607	YES	0.523788
STY0463_NP_455018.1_-_469625-469867	0.0516628	YES	0.562039
STY0493_NP_455048.1_+_500253-500525	0.0627275	YES	0.571019
STY0501_NP_455056.1_-_507959-509014	0.0267783	YES	0.541727
STY0509_NP_455063.1_+_516216-516785	0.132552	YES	0.62747
STY0511_NP_455065.1_-_517438-518988	0.0240619	YES	0.539497
STY0519_NP_455072.1_-_522109-525258	0.00978043	YES	0.527721
STY0550_NP_455099.1_-_557239-558093	0.0284126	YES	0.543067
STY0564_NP_455110.1_+_569787-570605	0.186732	YES	0.67148
STY0565_NP_455111.1_+_570690-572471	0.0487894	YES	0.559703
STY0592_NP_455134.1_+_597283-597975	0.100113	YES	0.601248
STY0599_NP_455140.1_-_604191-604502	0.0209938	YES	0.536975
STY0609_NP_455145.1_-_610081-610326	0.110259	YES	0.609443
STY0613_NP_455148.1_+_613438-613674	0.15135	YES	0.642705
STY0628_NP_455162.1_-_625677-627932	0.250089	YES	0.723109
STY0651_NP_455182.1_-_652161-653063	0.155856	YES	0.646363
STY0652_NP_455183.1_-_653380-654126	0.0126659	YES	0.530108
STY0664_NP_455193.1_-_664173-664583	0.123933	YES	0.620496
STY0670_NP_455198.1_-_668594-670123	0.0323701	YES	0.546309
STY0688_NP_455213.1_-_683163-684374	0.0930821	YES	0.595569
STY0720_NP_455243.1_-_717672-718892	0.0832938	YES	0.587661
STY0726_NP_455249.1_+_726976-727308	0.0418019	YES	0.554013
STY0735_NP_455258.1_+_735177-735719	0.0993544	YES	0.600635
STY0764_NP_455281.1_+_763368-764078	0.136397	YES	0.630583
STY0774_NP_455287.1_+_772118-772363	0.152685	YES	0.643789
STY0780_NP_455293.1_+_779343-780551	0.0203601	YES	0.536453
STY0796_NP_455306.1_+_792519-793307	0.252882	YES	0.725376
STY0800_NP_455310.1_-_797102-797488	0.372084	YES	0.818438
STY0811_NP_455320.1_-_807495-808970	0.0123304	YES	0.529831
STY0819_NP_455328.1_-_814916-816199	0.261805	YES	0.732605
STY0832_NP_455341.1_+_831359-831532	0.0035034	YES	0.522515
STY0835_NP_455342.1_-_833899-834807	0.0539709	YES	0.563914
STY0860_NP_455359.1_-_854264-854524	0.141273	YES	0.634533
STY0861_NP_455360.1_-_854511-854651	0.272546	YES	0.741277
STY0865_NP_455362.1_-_856198-858420	0.360891	YES	0.810178
STY0947_NP_455438.1_-_937728-937934	0.0930631	YES	0.595553
STY0948_NP_455439.1_-_938216-938893	0.150078	YES	0.641673
STY0957_NP_455447.1_+_947280-947774	0.0192163	YES	0.535512
STY0960_NP_455450.1_+_952706-954049	0.0866486	YES	0.590371
STY0980_NP_455467.1_+_975505-976188	0.0138039	YES	0.531048
STY0993_NP_455477.1_+_987917-988720	0.0524798	YES	0.562703
STY0997_NP_455481.1_+_995531-997378	0.101537	YES	0.602398
STY1012_NP_455491.1_-_1010084-1010332	0.0162606	YES	0.533076
STY1021_NP_455500.1_+_1015718-1016092	0.0220302	YES	0.537827
STY1029_NP_455508.1_+_1020282-1020443	0.067747	YES	0.575085
STY1038_NP_455516.1_+_1024883-1025008	0.284824	YES	0.751139
STY1039_NP_455517.1_-_1025144-1025593	0.380061	YES	0.824238
STY1045_NP_455523.1_+_1028101-1028361	0.115659	YES	0.613807
STY1046_NP_455524.1_+_1028451-1029203	0.014979	YES	0.532019
STY1047_NP_455525.1_+_1029169-1030572	0.142327	YES	0.635388
STY1055_NP_455533.1_+_1036140-1036694	0.0942593	YES	0.59652
STY1058_NP_455536.1_+_1037612-1038757	0.0154943	YES	0.532444
STY1059_NP_455537.1_+_1038768-1039208	0.10097	YES	0.60194
STY1062_NP_455540.1_+_1041830-1042417	0.0458735	YES	0.55733
STY1070_NP_455548.1_+_1046621-1047820	0.0899214	YES	0.593015
STY1072_NP_455550.1_+_1048497-1050008	0.0641664	YES	0.572185
STY1076_NP_455553.1_-_1051463-1052164	0.0558032	YES	0.565402
STY1099_NP_455575.1_-_1078113-1078775	0.00934173	YES	0.527358
STY1106_NP_455579.1_-_1079782-1080993	0.138478	YES	0.632269
STY1121_NP_455588.1_-_1088687-1090372	0.145626	YES	0.638062
STY1125_NP_455590.1_-_1090875-1090985	0.230144	YES	0.706883
STY1139_NP_455601.1_+_1102448-1103251	0.0726039	YES	0.579017
STY1156_NP_455615.1_+_1116294-1116461	0.500733	YES	0.900929
STY1176_NP_455633.1_-_1138300-1139133	0.0403903	YES	0.552861
STY1181_NP_455638.1_+_1141906-1142361	0.108883	YES	0.608332
STY1182_NP_455639.1_+_1142423-1142749	0.353989	YES	0.805018
STY1183_NP_455640.1_+_1142881-1143201	0.047269	YES	0.558466
STY1187_NP_455644.1_+_1146694-1148229	0.0503909	YES	0.561005
STY1193_NP_455650.1_+_1154032-1155084	0.00497885	YES	0.523741
STY1194_NP_455651.1_-_1155136-1155711	0.0285669	YES	0.543194
STY1206_NP_455661.1_+_1163401-1164048	0.0339013	YES	0.547562
STY1211_NP_455665.1_-_1167321-1167614	0.428946	YES	0.857999
STY1213_NP_455667.1_+_1168522-1168938	0.0530612	YES	0.563175
STY1214_NP_455668.1_+_1168942-1169346	0.00476727	YES	0.523565
STY1215_NP_455669.1_+_1169358-1170056	0.358192	YES	0.808166
STY1216_NP_455670.1_+_1170083-1171294	0.0595981	YES	0.568482
STY1217_NP_455671.1_+_1171315-1172070	0.0552863	YES	0.564983
STY1218_NP_455672.1_+_1172084-1172866	0.338931	YES	0.793602
STY1222_NP_455676.1_+_1175743-1177404	0.168821	YES	0.656898
STY1223_NP_455677.1_+_1177419-1178372	0.203459	YES	0.68512
STY1226a_NP_455680.1_+_1182681-1182929	0.17153	YES	0.659102
STY1247_NP_455699.1_+_1200818-1201456	0.0469784	YES	0.558229
STY1248_NP_455700.1_+_1201437-1202261	0.0848629	YES	0.588929
STY1254_NP_455706.1_+_1207090-1207347	0.073323	YES	0.579598
STY1294_NP_455745.1_-_1253291-1254133	0.017319	YES	0.533949
STY1304_NP_455753.1_+_1264354-1266102	0.151428	YES	0.642769
STY1308_NP_455755.1_+_1268078-1269085	0.0202558	YES	0.536368
STY1322_NP_455769.1_-_1279375-1279878	0.0313532	YES	0.545476
STY1323_NP_455770.1_-_1279968-1280150	0.292303	YES	0.757114
STY1337_NP_455784.1_+_1296327-1297301	0.0699684	YES	0.576884
STY1360_NP_455805.1_-_1320252-1320752	0.144735	YES	0.637339
STY1371_NP_455813.1_+_1327374-1328042	0.0474187	YES	0.558588
STY1381_NP_455822.1_-_1334414-1334920	0.0840953	YES	0.588308
STY1394_NP_455834.1_+_1346408-1347253	0.128454	YES	0.624154
STY1412_NP_455849.1_-_1362270-1363205	0.114622	YES	0.612969
STY1413_NP_455850.1_+_1363893-1365452	0.0860106	YES	0.589856
STY1416_NP_455852.1_-_1366390-1366824	0.0149321	YES	0.53198
STY1428_NP_455863.1_+_1378457-1382359	0.0249411	YES	0.540219
STY1439a_NP_455873.1_+_1390720-1391064	0.0947386	YES	0.596907
STY1443_NP_455876.1_+_1396054-1396629	0.186324	YES	0.671148
STY1444_NP_455877.1_+_1396641-1397843	0.182098	YES	0.667705
STY1477_NP_455908.1_+_1428801-1429466	0.052429	YES	0.562662
STY1478_NP_455909.1_-_1429522-1431642	0.260483	YES	0.731536
STY1495_NP_455925.1_-_1453538-1453681	0.101118	YES	0.602059
STY1533_NP_455953.1_+_1487971-1488513	0.0105029	YES	0.528319
STY1548_NP_455967.1_-_1500132-1500314	0.33373	YES	0.789611
STY1551_NP_455970.1_+_1503716-1504402	0.0388799	YES	0.551629
STY1560_NP_455977.1_+_1510585-1510926	0.106064	YES	0.606054
STY1571_NP_455986.1_+_1521003-1521905	0.0596518	YES	0.568525
STY1573_NP_455988.1_+_1522562-1523710	0.06248	YES	0.570818
STY1575_NP_455990.1_-_1525091-1525786	0.0154164	YES	0.53238
STY1578_NP_455992.1_-_1527260-1528159	0.0391213	YES	0.551826
STY1579_NP_455993.1_+_1528279-1529532	0.0797086	YES	0.584763
STY1582_NP_455995.1_+_1530608-1530889	0.654824	YES	0.962643
STY1615_NP_456026.1_+_1550387-1551982	0.00310226	YES	0.522181
STY1623_NP_456034.1_+_1557835-1558299	0.00375771	YES	0.522726
STY1624_NP_456035.1_+_1558296-1558550	0.131968	YES	0.626998
STY1628_NP_456039.1_+_1560870-1561205	0.0154245	YES	0.532386
STY1629_NP_456040.1_+_1561381-1563846	0.171727	YES	0.659262
STY1637_NP_456048.1_+_1568680-1569705	0.251972	YES	0.724638
STY1653_NP_456063.1_-_1581741-1583144	0.026023	YES	0.541107
STY1669_NP_456077.1_+_1597769-1598404	0.0253274	YES	0.540536
STY1677_NP_456085.1_+_1605896-1606363	0.0193395	YES	0.535613
STY1690_NP_456098.1_+_1615756-1616610	0.49572	YES	0.898217
STY1692_NP_456100.1_+_1617786-1618811	0.0344963	YES	0.548048
STY1708_NP_456116.1_-_1633485-1634477	0.0554222	YES	0.565093
STY1709_NP_456117.1_-_1634467-1635141	0.0139901	YES	0.531202
STY1712_NP_456120.1_-_1636450-1636698	0.184472	YES	0.669639
STY1714_NP_456122.1_-_1636978-1637193	0.214676	YES	0.69427
STY1715_NP_456123.1_-_1637287-1637976	0.0981977	YES	0.599701
STY1716_NP_456124.1_-_1637973-1638755	0.113998	YES	0.612465
STY1719_NP_456127.1_-_1639676-1640263	0.200682	YES	0.682855
STY1720_NP_456128.1_-_1640279-1641733	0.429124	YES	0.858116
STY1722_NP_456130.1_-_1642206-1642796	0.0701627	YES	0.577041
STY1723_NP_456131.1_-_1642803-1643129	0.359613	YES	0.809226
STY1728_NP_456136.1_+_1647071-1649833	0.0380448	YES	0.550947
STY1745_NP_456148.1_+_1666834-1667070	0.124515	YES	0.620967
STY1746_NP_456149.1_+_1667153-1667392	0.226674	YES	0.704055
STY1752_NP_456153.1_-_1671506-1672252	0.0297158	YES	0.544135
STY1761_NP_456162.1_-_1682538-1684916	0.02106	YES	0.537029
STY1764_NP_456165.1_+_1687445-1687636	0.0918352	YES	0.594561
STY1773_NP_456174.1_-_1696026-1697009	0.045267	YES	0.556836
STY1777_NP_456178.1_-_1698011-1698553	0.0906604	YES	0.593612
STY1783_NP_456183.1_+_1704611-1705570	0.134423	YES	0.628985
STY1793_NP_456193.1_+_1713175-1715427	0.446202	YES	0.869092
STY1805_NP_456204.1_-_1724211-1724696	0.145563	YES	0.638011
STY1832_NP_456227.1_+_1751541-1752827	0.182833	YES	0.668304
STY1854_NP_456244.1_+_1764423-1764671	0.196474	YES	0.679423
STY1870_NP_456259.1_+_1777746-1777895	0.293216	YES	0.757841
STY1878_NP_456268.1_-_1781177-1781734	0.0871808	YES	0.590801
STY1880a_NP_456271.1_+_1782539-1782802	0.2099	YES	0.690375
STY1882_NP_456273.1_+_1783564-1784085	0.160842	YES	0.650412
STY1886_NP_456275.1_+_1785388-1786197	0.000711839	YES	0.520193
STY1944_NP_456321.1_+_1833688-1834395	0.00209532	YES	0.521344
STY1968_NP_456344.1_-_1857374-1857517	0.258384	YES	0.729836
STY1988_NP_456360.1_+_1875015-1875410	0.0809167	YES	0.585739
STY1994_NP_456364.1_+_1877792-1877968	0.505575	YES	0.903507
STY2003_NP_456368.1_+_1883033-1883224	0.24082	YES	0.715576
STY2014_NP_456374.1_-_1890004-1891515	0.0641664	YES	0.572185
STY2016_NP_456376.1_-_1892192-1893391	0.0851821	YES	0.589186
STY2020_NP_456380.1_-_1894800-1895228	0.0102524	YES	0.528112
STY2028_NP_456388.1_-_1901062-1901502	0.142837	YES	0.635801
STY2032_NP_456392.1_-_1903577-1904131	0.117558	YES	0.615342
STY2034_NP_456394.1_-_1904501-1904869	0.0409542	YES	0.553321
STY2040_NP_456400.1_-_1909704-1911107	0.0725287	YES	0.578956
STY2048_NP_456408.1_-_1914557-1915114	0.111729	YES	0.610631
STY2057_NP_456418.1_+_1919308-1920240	0.145958	YES	0.638331
STY2066_NP_456427.1_+_1924903-1925322	0.0658284	YES	0.573532
STY2075_NP_456437.1_+_1931940-1932128	0.15911	YES	0.649005
STY2078_NP_456440.1_-_1933756-1933872	0.461879	YES	0.878759
STY2081_NP_456443.1_-_1935179-1935559	0.0486984	YES	0.559629
STY2082_NP_456444.1_+_1935691-1935921	0.00358065	YES	0.522579
STY2086_NP_456448.1_-_1939709-1940368	0.00854219	YES	0.526696
STY2095_NP_456454.1_+_1947124-1947993	0.0132535	YES	0.530594
STY2096_NP_456455.1_+_1948117-1949559	0.139788	YES	0.633331
STY2102_NP_456461.1_-_1954694-1955704	0.00618346	YES	0.52474
STY2128_NP_456485.1_-_1979723-1981384	0.120111	YES	0.617406
STY2156_NP_456511.1_+_2003441-2003596	0.00366838	YES	0.522652
STY2157_NP_456512.1_+_2003593-2003817	0.177243	YES	0.663752
STY2159_NP_456514.1_-_2004839-2005591	0.0283602	YES	0.543025
STY2167_NP_456520.1_-_2011173-2012693	0.526064	YES	0.913952
STY2168_NP_456521.1_+_2012950-2014353	0.4791	YES	0.888907
STY2170_NP_456523.1_+_2014775-2015143	0.0493998	YES	0.560199
STY2176_NP_456529.1_-_2019614-2019928	0.0103844	YES	0.528221
STY2178_NP_456531.1_+_2021820-2022815	0.136051	YES	0.630303
STY2186_NP_456539.1_+_2028567-2028944	0.00255621	YES	0.521727
STY2204_NP_456555.1_-_2042823-2043035	0.0252756	YES	0.540494
STY2217_NP_456568.1_-_2052806-2052976	0.190891	YES	0.674871
STY2246_NP_456591.1_+_2076210-2076884	0.0413235	YES	0.553623
STY2247_NP_456592.1_+_2076899-2077420	0.28658	YES	0.752544
STY2252_NP_456597.1_+_2080580-2081212	0.111098	YES	0.610121
STY2255_NP_456599.1_+_2081988-2082998	0.0318745	YES	0.545903
STY2256_NP_456600.1_+_2082995-2084389	0.118073	YES	0.615758
STY2271_NP_456613.1_-_2095447-2097723	0.0166143	YES	0.533368
STY2279A_NP_456618.1_+_2106208-2106249	0.834487	YES	0.991761
STY2281_NP_456620.1_+_2107398-2108702	0.000316532	YES	0.519864
STY2296_NP_456635.1_-_2124655-2125656	0.0387128	YES	0.551493
STY2300_NP_456639.1_-_2128914-2130227	0.166287	YES	0.654838
STY2317_NP_456653.1_-_2146457-2147899	0.0814659	YES	0.586183
STY2326_NP_456660.1_-_2154222-2155439	0.0247725	YES	0.540081
STY2329_NP_456662.1_-_2156864-2159023	0.0573711	YES	0.566675
STY2350_NP_456683.1_-_2188394-2189107	0.0320239	YES	0.546026
STY2363_NP_456694.1_-_2195153-2195350	0.0144122	YES	0.531551
STY2366_NP_456697.1_-_2198158-2198574	0.00852792	YES	0.526684
STY2374_NP_456704.1_-_2205062-2205808	0.042037	YES	0.554204
STY2380_NP_456710.1_-_2211940-2212623	0.2368	YES	0.712304
STY2382_NP_456712.1_-_2213488-2213769	0.10521	YES	0.605365
STY2402_NP_456731.1_-_2234412-2235848	0.0844168	YES	0.588568
STY2455_NP_456776.1_+_2286542-2288131	0.117251	YES	0.615094
STY2465_NP_456785.1_+_2295048-2295275	0.362331	YES	0.811248
STY2471_NP_456790.1_-_2302361-2302621	0.00349293	YES	0.522506
STY2517_NP_456831.1_+_2352415-2353368	0.109011	YES	0.608435
STY2559_NP_456871.1_-_2394916-2395068	0.0356732	YES	0.54901
STY2562_NP_456874.1_+_2398326-2398925	0.0383738	YES	0.551216
STY2568_NP_456880.1_+_2404240-2406384	0.15742	YES	0.647632
STY2573_NP_456885.1_-_2411356-2411628	0.117654	YES	0.615419
STY2584_NP_456896.1_-_2419511-2420293	0.019319	YES	0.535596
STY2602_NP_456913.1_+_2438615-2439616	0.227124	YES	0.704421
STY2623_NP_456932.1_+_2457358-2458671	0.0367296	YES	0.549873
STY2652_NP_456954.1_+_2489963-2490325	0.264541	YES	0.734818
STY2660_NP_456961.1_-_2497378-2498304	0.0979496	YES	0.5995
STY2667_NP_456968.1_+_2505403-2505660	0.021972	YES	0.53778
STY2674_NP_456972.1_+_2509322-2510614	0.120219	YES	0.617493
STY2709_NP_457006.1_-_2540186-2542465	0.00460496	YES	0.52343
STY2712_NP_457009.1_-_2545770-2546000	0.0946751	YES	0.596855
STY2718_NP_457014.1_+_2551867-2553567	0.0729862	YES	0.579326
STY2719_NP_457015.1_+_2553752-2556865	0.040679	YES	0.553097
STY2726_NP_457022.1_-_2563303-2564337	0.0239434	YES	0.5394
STY2748_NP_457041.1_+_2585891-2586430	0.0453814	YES	0.556929
STY2750_NP_457043.1_-_2587425-2587583	0.0330689	YES	0.546881
STY2753_NP_457046.1_+_2590945-2592294	0.0616974	YES	0.570184
STY2756_NP_457047.1_-_2597945-2599525	0.0948369	YES	0.596986
STY2769_NP_457056.1_-_2621651-2622625	0.166874	YES	0.655315
STY2778_NP_457063.1_-_2631984-2636918	0.0419719	YES	0.554151
STY2803_NP_457086.1_+_2659359-2660549	0.0247362	YES	0.540051
STY2804_NP_457087.1_+_2660730-2662274	0.0297614	YES	0.544173
STY2812_NP_457095.1_-_2672341-2676228	0.0175182	YES	0.534113
STY2829_NP_457112.1_-_2690859-2692658	0.0565149	YES	0.56598
STY2836_NP_457119.1_+_2698505-2699839	0.0390219	YES	0.551745
STY2841_NP_457123.1_-_2703013-2704050	0.0648144	YES	0.57271
STY2849_NP_457131.1_-_2717996-2720569	0.0418791	YES	0.554076
STY2853_NP_457135.1_+_2723548-2723886	0.198298	YES	0.68091
STY2868_NP_457151.1_-_2737496-2738086	0.0989935	YES	0.600343
STY2881_NP_457164.1_-_2760910-2761128	0.308427	YES	0.769895
STY2884_NP_457167.1_-_2762798-2765875	0.0661319	YES	0.573777
STY2894_NP_457177.1_-_2776664-2778844	0.111535	YES	0.610474
STY2905_NP_457184.1_+_2787537-2787656	0.225445	YES	0.703053
STY2933_NP_457207.1_+_2807533-2808492	0.0462629	YES	0.557647
STY2937_NP_457209.1_+_2811175-2812170	0.00541423	YES	0.524102
STY2942_NP_457214.1_-_2817449-2818819	0.0793989	YES	0.584512
STY2947_NP_457219.1_-_2823850-2824035	0.0204563	YES	0.536533
STY2958_NP_457230.1_+_2834395-2834508	0.264713	YES	0.734957
STY2986a_NP_457259.1_+_2862665-2862874	0.388311	YES	0.830158
STY2989_NP_457262.1_-_2865343-2865795	0.0599792	YES	0.568791
STY2994_NP_457267.1_-_2868089-2868331	0.266056	YES	0.736042
STY2995_NP_457268.1_-_2868356-2869534	0.0370358	YES	0.550123
STY2996_NP_457269.1_+_2869850-2870779	0.22173	YES	0.700024
STY3001_NP_457272.1_-_2874081-2875712	0.324754	YES	0.782671
STY3005_NP_457276.1_-_2876689-2878746	0.278776	YES	0.746289
STY3006_NP_457277.1_-_2878765-2879787	0.675126	YES	0.967851
STY3007_NP_457278.1_-_2879857-2881086	0.691482	YES	0.971621
STY3008_NP_457279.1_-_2881114-2882895	0.00770105	YES	0.525999
STY3015_NP_457286.1_-_2887246-2888256	0.0383572	YES	0.551202
STY3020_NP_457291.1_-_2892482-2893600	0.493168	YES	0.896818
STY3023_NP_457294.1_+_2896388-2896831	0.213336	YES	0.693177
STY3026_NP_457295.1_+_2897705-2897995	0.293842	YES	0.75834
STY3032_NP_457299.1_-_2900260-2900586	0.16359	YES	0.652645
STY3044_NP_457308.1_+_2911407-2912171	0.263507	YES	0.733982
STY3050_NP_457314.1_-_2916132-2917253	0.664324	YES	0.965155
STY3073_NP_457334.1_+_2935978-2936931	0.156335	YES	0.646751
STY3091_NP_457349.1_+_2954726-2955844	0.108966	YES	0.608399
STY3099_NP_457357.1_-_2967439-2968779	0.014036	YES	0.53124
STY3175_NP_457422.1_-_3044673-3045416	0.058236	YES	0.567377
STY3183_NP_457428.1_-_3051786-3052013	0.127852	YES	0.623667
STY3189_NP_457432.1_-_3055153-3055644	0.010175	YES	0.528048
STY3194_NP_457436.1_-_3060097-3060849	0.122523	YES	0.619356
STY3199_NP_457441.1_-_3066210-3066923	0.0664206	YES	0.574011
STY3208_NP_457450.1_-_3073310-3074149	0.124222	YES	0.620731
STY3216_NP_457458.1_+_3084252-3084581	0.156554	YES	0.646929
STY3219_NP_457461.1_-_3087302-3087961	0.00719146	YES	0.525576
STY3227_NP_457468.1_-_3093928-3095091	0.0515486	YES	0.561946
STY3255_NP_457494.1_+_3117914-3118204	0.0864815	YES	0.590236
STY3279_NP_457510.1_+_3134334-3134630	0.366916	YES	0.814641
STY3309_NP_457533.1_-_3156513-3157568	0.120388	YES	0.61763
STY3328_NP_457548.1_+_3173337-3173747	0.223675	YES	0.70161
STY3364_NP_457578.1_+_3206069-3207544	0.0183918	YES	0.534833
STY3381_NP_457593.1_-_3224502-3225803	0.023567	YES	0.539091
STY3408_NP_457617.1_+_3253884-3254252	0.136554	YES	0.630711
STY3422_NP_457628.1_-_3262502-3263866	0.203599	YES	0.685234
STY3449_NP_457650.1_+_3292911-3293501	0.0682239	YES	0.575472
STY3471_NP_457672.1_-_3316375-3316707	0.0351707	YES	0.548599
STY3479_NP_457679.1_+_3323177-3324610	0.0356405	YES	0.548983
STY3499_NP_457699.1_+_3338936-3340369	0.105682	YES	0.605746
STY3500_NP_457700.1_+_3340392-3340679	0.0152271	YES	0.532223
STY3528_NP_457725.1_+_3369026-3370393	0.106119	YES	0.606099
STY3538_NP_457734.1_-_3379525-3380154	0.0508283	YES	0.561361
STY3540_NP_457736.1_+_3381626-3382096	0.157516	YES	0.64771
STY3543_NP_457738.1_+_3382828-3383094	0.00316177	YES	0.522231
STY3554_NP_457750.1_-_3397118-3398161	0.0234277	YES	0.538976
STY3559_NP_457755.1_+_3403698-3404168	0.0486673	YES	0.559604
STY3595_NP_457787.1_+_3449980-3450933	0.062666	YES	0.570969
STY3613_NP_457805.1_-_3467268-3467471	0.283087	YES	0.749748
STY3623_NP_457815.1_+_3476682-3477851	0.0872502	YES	0.590857
STY3641_NP_457833.1_+_3498321-3499802	0.177847	YES	0.664243
STY3650_NP_457841.1_-_3507263-3507604	0.0111974	YES	0.528894
STY3652_NP_457843.1_-_3508199-3509743	0.0912851	YES	0.594117
STY3655_NP_457846.1_-_3512700-3512960	0.114677	YES	0.613014
STY3661_NP_457852.1_+_3517613-3517834	0.0877337	YES	0.591248
STY3666_NP_457857.1_+_3519440-3519667	0.0123821	YES	0.529874
STY3668_NP_457859.1_+_3520518-3522932	0.0712076	YES	0.577887
STY3677_NP_457868.1_+_3530722-3531780	0.0190848	YES	0.535404
STY3679_NP_457870.1_+_3532467-3532994	0.0535159	YES	0.563545
STY3686_NP_457877.1_+_3535233-3535679	0.0500611	YES	0.560737
STY3694_NP_457885.1_-_3540251-3540691	0.0546166	YES	0.564439
STY3700_NP_457891.1_+_3544010-3547087	0.0661319	YES	0.573777
STY3703_NP_457894.1_+_3548757-3548975	0.270619	YES	0.739725
STY3713_NP_457902.1_+_3564352-3564807	0.0107589	YES	0.528531
STY3715_NP_457904.1_-_3565553-3565825	0.204038	YES	0.685592
STY3736_NP_457921.1_-_3587676-3588104	0.0737053	YES	0.579908
STY3754_NP_457940.1_+_3613296-3615947	0.191145	YES	0.675078
STY3761_NP_457946.1_-_3623363-3624253	0.253151	YES	0.725594
STY3768_NP_457952.1_-_3632107-3634539	0.0614322	YES	0.569969
STY3770_NP_457954.1_+_3635967-3636284	0.00194478	YES	0.521219
STY3776_NP_457958.1_+_3642207-3643232	0.0017697	YES	0.521073
STY3777_NP_457959.1_+_3643326-3644318	0.02209	YES	0.537877
STY3782_NP_457964.1_-_3648077-3648316	0.168497	YES	0.656635
STY3788_NP_457970.1_+_3653687-3654283	0.116666	YES	0.614621
STY3796_NP_457978.1_-_3660392-3661927	0.0355647	YES	0.548921
STY3811_NP_457991.1_-_3674335-3674835	0.12048	YES	0.617704
STY3836_NP_458010.1_-_3693908-3695008	0.414908	YES	0.848642
STY3837_NP_458011.1_+_3695190-3696221	0.275013	YES	0.743263
STY3850_NP_458023.1_-_3706680-3707117	0.0102212	YES	0.528086
STY3875_NP_458043.1_+_3730003-3731052	0.00463091	YES	0.523452
STY3878_NP_458046.1_-_3734345-3734860	0.161698	YES	0.651108
STY3891_NP_458057.1_-_3751662-3752660	0.144015	YES	0.636756
STY3901_NP_458066.1_-_3762923-3763915	0.0246025	YES	0.539941
STY3918_NP_458083.1_+_3780596-3781171	0.0111269	YES	0.528836
STY3929_NP_458092.1_+_3792955-3793728	0.0682892	YES	0.575524
STY3935_NP_458098.1_-_3798276-3799178	0.0494594	YES	0.560248
STY3938_NP_458101.1_-_3802080-3803726	0.153678	YES	0.644594
STY3940_NP_458104.1_+_3805127-3806527	0.132686	YES	0.627578
STY3944_NP_458108.1_-_3811353-3812261	0.0605022	YES	0.569215
STY3948_NP_458112.1_+_3816148-3817170	0.16141	YES	0.650874
STY3951_NP_458115.1_-_3819535-3822270	0.186358	YES	0.671176
STY3999_NP_458154.1_+_3864845-3865132	0.135149	YES	0.629573
STY4005_NP_458158.1_-_3869336-3869659	0.161146	YES	0.650659
STY4025_NP_458172.1_-_3888370-3889050	0.113281	YES	0.611885
STY4057_NP_458189.1_-_3918003-3918887	0.00423779	YES	0.523125
STY4071_NP_458203.1_+_3929404-3930438	0.0156603	YES	0.532581
STY4078_NP_458210.1_+_3935641-3936651	0.148528	YES	0.640415
STY4090_NP_458222.1_-_3948736-3950019	0.0154544	YES	0.532411
STY4094_NP_458226.1_+_3952633-3953100	0.103213	YES	0.603752
STY4105_NP_458235.1_-_3963524-3966847	0.345082	YES	0.798291
STY4116_NP_458246.1_+_3978586-3980124	0.21019	YES	0.690611
STY4131_NP_458260.1_+_3993461-3994261	0.0614945	YES	0.57002
STY4152_NP_458275.1_-_4011911-4012450	0.161593	YES	0.651023
STY4164_NP_458287.1_-_4022959-4023966	0.0132184	YES	0.530565
STY4178_NP_458298.1_-_4037181-4038752	0.0513105	YES	0.561753
STY4182_NP_458302.1_+_4042585-4044885	0.104749	YES	0.604993
STY4195_NP_458311.1_-_4060716-4061744	0.0179415	YES	0.534462
STY4196_NP_458312.1_-_4061817-4062719	0.0139717	YES	0.531187
STY4199_NP_458315.1_+_4064592-4066181	0.0610159	YES	0.569631
STY4220_NP_458332.1_-_4085586-4085966	0.0993499	YES	0.600631
STY4240_NP_458350.1_+_4105776-4107251	0.0831097	YES	0.587512
STY4246_NP_458354.1_-_4111579-4111713	0.167616	YES	0.655919
STY4259_NP_458367.1_-_4122975-4123346	0.15509	YES	0.645741
STY4264_NP_458372.1_-_4128092-4129306	0.0749184	YES	0.580889
STY4280_NP_458388.1_+_4150139-4150897	0.146062	YES	0.638415
STY4281_NP_458389.1_-_4150971-4153676	0.0906964	YES	0.593642
STY4282_NP_458390.1_+_4154270-4156663	0.0823042	YES	0.586861
STY4290_NP_458398.1_-_4164137-4166455	0.0213177	YES	0.537241
STY4324_NP_458430.1_+_4207808-4208380	0.0892037	YES	0.592436
STY4332_NP_458436.1_+_4214265-4214669	0.00735808	YES	0.525715
STY4338_NP_458440.1_+_4217480-4217704	0.0343116	YES	0.547897
STY4344_NP_458446.1_-_4223376-4223594	0.28198	YES	0.74886
STY4352_NP_458454.1_+_4227831-4229945	0.0631355	YES	0.57135
STY4359_NP_458461.1_+_4233956-4234561	0.0149038	YES	0.531956
STY4363_NP_458465.1_+_4236009-4236341	0.0354929	YES	0.548863
STY4366_NP_458468.1_+_4237483-4237674	0.0597344	YES	0.568592
STY4369_NP_458471.1_+_4238474-4238788	0.178825	YES	0.665039
STY4377_NP_458479.1_+_4241702-4242136	0.037126	YES	0.550197
STY4408_NP_458510.1_+_4277151-4277252	0.318391	YES	0.777715
STY4409_NP_458511.1_+_4277287-4277826	0.103173	YES	0.603719
STY4411_NP_458513.1_-_4278739-4279011	0.0357134	YES	0.549043
STY4418_NP_458520.1_+_4287376-4287621	0.603229	YES	0.946536
STY4428_NP_458530.1_+_4298723-4299640	0.323111	YES	0.781394
STY4441_NP_458543.1_-_4310667-4311650	0.0856221	YES	0.589542
STY4444_NP_458546.1_+_4314427-4315620	0.105108	YES	0.605282
STY4452_NP_458554.1_+_4322993-4323625	0.0440928	YES	0.55588
STY4456_NP_458556.1_+_4325000-4326307	0.255797	YES	0.72774
STY4458_NP_458558.1_+_4327598-4337449	0.356279	YES	0.806736
STY4460_NP_458560.1_+_4344317-4346383	0.0757729	YES	0.58158
STY4463_NP_458563.1_-_4349095-4349418	0.0303909	YES	0.544688
STY4474_NP_458574.1_+_4360977-4361123	0.0408358	YES	0.553225
STY4494_NP_458594.1_-_4382756-4383517	0.0857636	YES	0.589656
STY4500a_NP_458601.1_-_4393711-4393977	0.397103	YES	0.836372
STY4512_NP_458608.1_-_4404478-4404861	0.099943	YES	0.60111
STY4513_NP_458609.1_-_4404849-4405046	0.359813	YES	0.809375
STY4515_NP_458611.1_-_4405353-4406228	0.20549	YES	0.686776
STY4521_NP_458616.1_+_4409652-4410686	0.0915695	YES	0.594347
STY4528_NP_458622.1_+_4415909-4417252	0.226133	YES	0.703613
STY4529_NP_458623.1_+_4417838-4418617	0.166212	YES	0.654776
STY4535_NP_458626.1_+_4421920-4422138	0.101853	YES	0.602653
STY4539_NP_458628.1_+_4423868-4425112	0.0604717	YES	0.56919
STY4544_NP_458632.1_+_4428630-4429100	0.309571	YES	0.770797
STY4551_NP_458639.1_+_4433684-4434991	0.0643099	YES	0.572301
STY4552_NP_458640.1_+_4435339-4436490	0.0350285	YES	0.548483
STY4557_NP_458643.1_+_4438648-4439562	0.207714	YES	0.688591
STY4558_NP_458644.1_+_4439581-4440321	0.171137	YES	0.658783
STY4560_NP_458646.1_+_4441022-4441522	0.208131	YES	0.688931
STY4571_NP_458656.1_+_4449482-4449925	0.133782	YES	0.628466
STY4582_NP_458666.1_-_4458746-4459105	0.10636	YES	0.606294
STY4597_NP_458681.1_-_4472479-4473753	0.00919916	YES	0.52724
STY4600_NP_458683.1_-_4474437-4474655	0.0788691	YES	0.584084
STY4603_NP_458686.1_-_4476305-4479085	0.0908388	YES	0.593757
STY4609_NP_458691.1_+_4481801-4482523	0.302154	YES	0.764941
STY4625_NP_458707.1_-_4491144-4492208	0.142819	YES	0.635786
STY4630_NP_458712.1_-_4496774-4497838	0.00488187	YES	0.52366
STY4638_NP_458718.1_-_4503667-4503894	0.0556371	YES	0.565268
STY4639_NP_458719.1_-_4503894-4504127	0.00670359	YES	0.525172
STY4643_NP_458723.1_-_4505250-4505492	0.0324217	YES	0.546351
STY4644_NP_458724.1_+_4505609-4506241	0.103386	YES	0.603891
STY4648_NP_458727.1_+_4508347-4508634	0.00221148	YES	0.521441
STY4652_NP_458731.1_-_4512573-4513877	0.0762593	YES	0.581974
STY4656_NP_458735.1_-_4516537-4518273	0.00436989	YES	0.523235
STY4659_NP_458738.1_-_4519050-4521545	0.00865998	YES	0.526793
STY4679_NP_458758.1_-_4540153-4541343	0.108255	YES	0.607825
STY4690_NP_458769.1_+_4551605-4553251	0.0928173	YES	0.595355
STY4696_NP_458775.1_+_4556973-4557119	0.0578766	YES	0.567085
STY4718_NP_458797.1_+_4580924-4581232	0.0858252	YES	0.589706
STY4724_NP_458803.1_+_4586962-4587387	0.00561109	YES	0.524265
STY4733_NP_458811.1_+_4595156-4596778	0.0328442	YES	0.546697
STY4734_NP_458812.1_-_4596823-4597146	0.129132	YES	0.624702
STY4737_NP_458815.1_-_4598488-4599243	0.0298817	YES	0.544271
STY4745_NP_458823.1_-_4605311-4605586	0.00962664	YES	0.527594
STY4752_NP_458830.1_-_4608620-4609255	0.0968361	YES	0.598601
STY4760_NP_458838.1_+_4617488-4617874	0.0883886	YES	0.591777
STY4768_NP_458846.1_+_4625159-4626892	0.218074	YES	0.697042
STY4778_NP_458856.1_+_4639354-4639740	0.0118978	YES	0.529473
STY4787_NP_458865.1_+_4645474-4647447	0.0782288	YES	0.583566
STY4788_NP_458866.1_+_4647525-4647767	0.163073	YES	0.652225
STY4792_NP_458870.1_+_4650973-4651143	0.265343	YES	0.735466
STY4795_NP_458873.1_-_4654435-4655382	0.0836325	YES	0.587934
STY4800_NP_458878.1_-_4660048-4660983	0.0901781	YES	0.593223
STY4810_NP_458889.1_-_4670244-4670399	0.414242	YES	0.848191
STY4811_NP_458890.1_-_4670479-4670967	0.00317683	YES	0.522243
STY4819_NP_458898.1_-_4680830-4681828	0.0429744	YES	0.554968
STY4826_NP_458904.1_-_4689323-4689562	0.00181698	YES	0.521113
STY4827_NP_458905.1_-_4689566-4690426	0.150833	YES	0.642285
STY4833_NP_458911.1_+_4694767-4694907	0.26307	YES	0.733629
STY4842_NP_458915.1_+_4702716-4702925	0.0967506	YES	0.598532
STY4862_NP_458931.1_+_4725066-4725839	0.0765453	YES	0.582205
STY4863_NP_458932.1_-_4725840-4726853	0.0490771	YES	0.559937
STY4878_NP_458945.1_-_4740315-4740458	0.030665	YES	0.544913
STY4881_NP_458948.1_-_4741999-4743387	0.00150671	YES	0.520854
STY4887_NP_458952.1_+_4750276-4750578	0.0153409	YES	0.532317
STY4895_NP_458957.1_-_4758838-4759299	0.260313	YES	0.731398
STY4902_NP_458964.1_-_4764093-4764551	0.0428035	YES	0.554829
STY4911_NP_458973.1_+_4772444-4773061	0.0604208	YES	0.569149
STY4943_NP_458999.1_-_4803706-4804389	0.0887925	YES	0.592103
STY4944_NP_459000.1_-_4804460-4805005	0.0162968	YES	0.533106
STY4948_NP_459004.1_+_4807787-4807927	0.0843546	YES	0.588518

## Sheet: Ty2
Protein	Score	T3S protein or Not	Probability
t0001_NP_803886.1_+_190-255	0.445866	YES	0.868881
t0002_NP_803887.1_+_337-2799	0.0980702	YES	0.599598
t0004_NP_803889.1_+_3734-5020	0.0158782	YES	0.532761
t0011_NP_803896.1_-_10841-11245	0.18762	YES	0.672205
t0017_NP_803902.1_-_17049-17492	0.135405	YES	0.62978
t0019_NP_803904.1_+_20004-21155	0.140124	YES	0.633603
t0023_NP_803908.1_+_25116-25802	0.20988	YES	0.690358
t0026_NP_803910.1_+_29437-29982	0.0582534	YES	0.567391
t0029_NP_803913.1_+_31278-32123	0.0092188	YES	0.527256
t0033_NP_803917.1_-_34511-34816	0.0787196	YES	0.583963
t0034_NP_803918.1_+_35339-37057	0.0930077	YES	0.595509
t0040_NP_803924.1_+_44308-46023	0.019046	YES	0.535372
t0045_NP_803929.1_-_52277-52540	0.184337	YES	0.669529
t0083_NP_803967.1_-_94577-94867	0.0170715	YES	0.533745
t0096_NP_803980.1_-_105605-107959	0.0118464	YES	0.529431
t0115_NP_803998.1_-_131078-132478	0.0312346	YES	0.545379
t0117_NP_804000.1_-_133572-135143	0.0134281	YES	0.530738
t0138_NP_804021.1_+_158341-159258	0.0645052	YES	0.57246
t0139_NP_804022.1_+_159608-160036	0.150365	YES	0.641906
t0149_NP_804032.1_-_169457-170842	0.118936	YES	0.616456
t0159_NP_804042.1_+_182056-183945	0.221568	YES	0.699891
t0163_NP_804046.1_-_186986-188608	0.163229	YES	0.652351
t0167_NP_804050.1_+_193329-194600	0.128562	YES	0.624241
t0169_NP_804052.1_+_195583-196350	0.0130269	YES	0.530406
t0170_NP_804053.1_-_196380-197174	0.045035	YES	0.556647
t0184_NP_804067.1_-_210255-211430	0.0636967	YES	0.571804
t0187_NP_804070.1_-_212686-213252	0.109107	YES	0.608513
t0188_NP_804071.1_-_213239-215830	0.154979	YES	0.645651
t0189_NP_804072.1_-_215905-216639	0.00733293	YES	0.525694
t0191_NP_804074.1_-_217797-218276	0.0186876	YES	0.535076
t0203_NP_804085.1_-_234210-235490	0.00102043	YES	0.52045
t0209_NP_804091.1_+_239844-241361	0.00993036	YES	0.527845
t0210_NP_804092.1_+_241491-242918	0.107229	YES	0.606996
t0220_NP_804101.1_+_254023-254580	0.119468	YES	0.616886
t0226_NP_804107.1_+_261789-262274	0.161178	YES	0.650685
t0247_NP_804127.1_-_283289-283693	0.246097	YES	0.719867
t0250_NP_804130.1_-_285312-286343	0.167311	YES	0.65567
t0262_NP_804139.1_+_300799-301836	0.0648144	YES	0.57271
t0267_NP_804143.1_-_305010-306344	0.0390219	YES	0.551745
t0274_NP_804150.1_+_312191-313990	0.0565149	YES	0.56598
t0291_NP_804167.1_+_328621-332508	0.0175182	YES	0.534113
t0299_NP_804175.1_-_342575-344119	0.0297614	YES	0.544173
t0300_NP_804176.1_-_344300-345490	0.0247362	YES	0.540051
t0324_NP_804199.1_+_367931-372865	0.0419719	YES	0.554151
t0332_NP_804206.1_+_382224-383198	0.166874	YES	0.655315
t0343_NP_804215.1_+_405324-406904	0.0948369	YES	0.596986
t0345_NP_804216.1_-_412555-413904	0.0616974	YES	0.570184
t0348_NP_804219.1_+_417266-417424	0.0330689	YES	0.546881
t0350_NP_804221.1_-_418419-418958	0.0453814	YES	0.556929
t0371_NP_804240.1_+_440512-441546	0.0239434	YES	0.5394
t0378_NP_804247.1_-_447848-450961	0.040679	YES	0.553097
t0379_NP_804248.1_-_451146-452846	0.0729862	YES	0.579326
t0384_NP_804253.1_+_458713-458943	0.0946751	YES	0.596855
t0387_NP_804256.1_+_462248-464527	0.00460496	YES	0.52343
t0421_NP_804290.1_-_494098-495390	0.120219	YES	0.617493
t0426_NP_804295.1_-_499051-499308	0.021972	YES	0.53778
t0433_NP_804302.1_+_506407-507333	0.0979496	YES	0.5995
t0444_NP_804309.1_-_514387-514749	0.264541	YES	0.734818
t0473_NP_804331.1_-_546041-547354	0.0367296	YES	0.549873
t0493_NP_804350.1_-_565096-566097	0.227124	YES	0.704421
t0510_NP_804367.1_+_584419-585201	0.019319	YES	0.535596
t0521_NP_804378.1_+_593084-593356	0.117654	YES	0.615419
t0526_NP_804383.1_-_598328-600472	0.15742	YES	0.647632
t0532_NP_804389.1_-_605787-606386	0.0383738	YES	0.551216
t0535_NP_804392.1_+_609644-609796	0.0356732	YES	0.54901
t0576_NP_804433.1_-_651344-652297	0.109011	YES	0.608435
t0589_NP_804446.1_-_666818-667513	0.0093789	YES	0.527389
t0619_NP_804475.1_+_702092-702352	0.00349293	YES	0.522506
t0627_NP_804479.1_-_709439-709666	0.362331	YES	0.811248
t0636_NP_804488.1_-_716583-718172	0.117251	YES	0.615094
t0683_NP_804532.1_+_768089-769525	0.0844168	YES	0.588568
t0703_NP_804551.1_+_790168-790449	0.10521	YES	0.605365
t0705_NP_804553.1_+_791314-791997	0.2368	YES	0.712304
t0711_NP_804558.1_+_798128-798874	0.042037	YES	0.554204
t0719_NP_804565.1_+_805362-805778	0.00852792	YES	0.526684
t0722_NP_804568.1_+_808586-808783	0.0144122	YES	0.531551
t0735_NP_804579.1_+_814829-815542	0.0320239	YES	0.546026
t0756_NP_804600.1_+_844913-847072	0.0573711	YES	0.566675
t0759_NP_804603.1_+_848489-849706	0.0247725	YES	0.540081
t0767_NP_804610.1_+_856029-857471	0.0814659	YES	0.586183
t0782_NP_804624.1_+_873701-875014	0.166287	YES	0.654838
t0786_NP_804628.1_+_878272-879273	0.0387128	YES	0.551493
t0801_NP_804643.1_-_895226-896530	0.000316532	YES	0.519864
t0803_NP_804645.1_-_897679-897720	0.834487	YES	0.991761
t0809_NP_804650.1_+_906205-908481	0.0166143	YES	0.533368
t0823_NP_804663.1_-_919539-920933	0.118073	YES	0.615758
t0824_NP_804664.1_-_920930-921940	0.0318745	YES	0.545903
t0827_NP_804666.1_-_922716-923348	0.111098	YES	0.610121
t0832_NP_804671.1_-_926508-927029	0.28658	YES	0.752544
t0833_NP_804672.1_-_927044-927718	0.0413235	YES	0.553623
t0860_NP_804695.1_+_950952-951122	0.190891	YES	0.674871
t0871_NP_804704.1_-_970921-973881	0.044459	YES	0.556178
t0882_NP_804712.1_+_983453-983665	0.0252756	YES	0.540494
t0899_NP_804728.1_-_997544-997921	0.00255621	YES	0.521727
t0907_NP_804736.1_-_1003673-1004668	0.136051	YES	0.630303
t0909_NP_804738.1_+_1006560-1006874	0.0103844	YES	0.528221
t0915_NP_804744.1_-_1011338-1011706	0.0493998	YES	0.560199
t0917_NP_804746.1_-_1012128-1013531	0.4791	YES	0.888907
t0918_NP_804747.1_+_1013788-1015308	0.526064	YES	0.913952
t0925_NP_804753.1_+_1020890-1021642	0.0283602	YES	0.543025
t0927_NP_804755.1_-_1022664-1022888	0.177243	YES	0.663752
t0928_NP_804756.1_-_1022885-1023040	0.00366838	YES	0.522652
t0958_NP_804782.1_+_1045097-1046758	0.120111	YES	0.617406
t0983_NP_804806.1_+_1070777-1071787	0.00618346	YES	0.52474
t0989_NP_804812.1_-_1076922-1078364	0.139788	YES	0.633331
t0990_NP_804813.1_-_1078488-1079357	0.0132535	YES	0.530594
t0997_NP_804820.1_+_1086113-1086772	0.00854219	YES	0.526696
t1001_NP_804824.1_-_1090560-1090790	0.00358065	YES	0.522579
t1002_NP_804825.1_+_1090922-1091302	0.0486984	YES	0.559629
t1005_NP_804828.1_+_1092609-1092725	0.461879	YES	0.878759
t1013_NP_804833.1_-_1097908-1098099	0.24082	YES	0.715576
t1018_NP_804837.1_-_1103164-1103340	0.505575	YES	0.903507
t1022_NP_804841.1_-_1105722-1106117	0.0809167	YES	0.585739
t1040_NP_804857.1_+_1123615-1123758	0.258384	YES	0.729836
t1063_NP_804880.1_-_1146737-1147444	0.00209532	YES	0.521344
t1111_NP_804925.1_-_1194935-1195744	0.000711839	YES	0.520193
t1114_NP_804927.1_-_1197047-1197568	0.160842	YES	0.650412
t1116_NP_804929.1_-_1198330-1198593	0.2099	YES	0.690375
t1119_NP_804932.1_+_1199398-1199955	0.0871808	YES	0.590801
t1129_NP_804941.1_-_1203237-1203386	0.293216	YES	0.757841
t1145_NP_804956.1_-_1216461-1216709	0.196474	YES	0.679423
t1163_NP_804973.1_-_1228305-1229591	0.182833	YES	0.668304
t1187_NP_804994.1_+_1256434-1256919	0.145563	YES	0.638011
t1198_NP_805005.1_-_1265703-1267955	0.446202	YES	0.869092
t1208_NP_805015.1_-_1275560-1276519	0.134423	YES	0.628985
t1214_NP_805020.1_+_1282577-1283119	0.0906604	YES	0.593612
t1218_NP_805024.1_+_1284121-1285104	0.045267	YES	0.556836
t1227_NP_805033.1_-_1293494-1293685	0.0918352	YES	0.594561
t1230_NP_805036.1_+_1296214-1298592	0.02106	YES	0.537029
t1239_NP_805045.1_+_1308878-1309624	0.0297158	YES	0.544135
t1244_NP_805049.1_-_1313738-1313977	0.226674	YES	0.704055
t1245_NP_805050.1_-_1314060-1314296	0.124515	YES	0.620967
t1260_NP_805063.1_-_1331303-1334065	0.0380448	YES	0.550947
t1265_NP_805068.1_+_1338007-1338333	0.359613	YES	0.809226
t1266_NP_805069.1_+_1338340-1338930	0.0701627	YES	0.577041
t1268_NP_805071.1_+_1339403-1340857	0.429124	YES	0.858116
t1269_NP_805072.1_+_1340873-1341460	0.200682	YES	0.682855
t1272_NP_805075.1_+_1342381-1343163	0.113998	YES	0.612465
t1273_NP_805076.1_+_1343160-1343849	0.0981977	YES	0.599701
t1274_NP_805077.1_+_1343943-1344158	0.214676	YES	0.69427
t1276_NP_805079.1_+_1344438-1344686	0.184472	YES	0.669639
t1279_NP_805082.1_+_1345995-1346669	0.0139901	YES	0.531202
t1280_NP_805083.1_+_1346659-1347651	0.0554222	YES	0.565093
t1298_NP_805099.1_-_1362325-1363350	0.0344963	YES	0.548048
t1300_NP_805101.1_-_1364526-1365380	0.49572	YES	0.898217
t1313_NP_805114.1_-_1374773-1375240	0.0193395	YES	0.535613
t1321_NP_805122.1_-_1382732-1383367	0.0253274	YES	0.540536
t1337_NP_805136.1_+_1397992-1399395	0.026023	YES	0.541107
t1351_NP_805147.1_-_1410960-1411985	0.251972	YES	0.724638
t1359_NP_805155.1_-_1416819-1419284	0.171727	YES	0.659262
t1360_NP_805156.1_-_1419460-1419795	0.0154245	YES	0.532386
t1364_NP_805160.1_-_1422115-1422369	0.131968	YES	0.626998
t1365_NP_805161.1_-_1422366-1422830	0.00375771	YES	0.522726
t1373_NP_805169.1_-_1428683-1430278	0.00310226	YES	0.522181
t1405_NP_805200.1_-_1449776-1450057	0.654824	YES	0.962643
t1407_NP_805202.1_-_1451133-1452386	0.0797086	YES	0.584763
t1408_NP_805203.1_+_1452506-1453405	0.0391213	YES	0.551826
t1410_NP_805205.1_+_1454879-1455574	0.0154164	YES	0.53238
t1412_NP_805207.1_-_1456955-1458103	0.06248	YES	0.570818
t1414_NP_805209.1_-_1458760-1459662	0.0596518	YES	0.568525
t1424_NP_805218.1_-_1469739-1470080	0.106064	YES	0.606054
t1431_NP_805224.1_-_1476263-1476949	0.0388799	YES	0.551629
t1434_NP_805227.1_+_1480351-1480533	0.33373	YES	0.789611
t1449_NP_805242.1_-_1493412-1493954	0.0105029	YES	0.528319
t1480_NP_805269.1_+_1528244-1528387	0.101118	YES	0.602059
t1497_NP_805283.1_+_1549539-1551659	0.260483	YES	0.731536
t1498_NP_805284.1_-_1551715-1552380	0.052429	YES	0.562662
t1529_NP_805315.1_-_1583338-1584540	0.182098	YES	0.667705
t1530_NP_805316.1_-_1584552-1585127	0.186324	YES	0.671148
t1544_NP_805328.1_-_1598822-1602724	0.0249411	YES	0.540219
t1555_NP_805338.1_+_1614358-1614792	0.0149321	YES	0.53198
t1557_NP_805340.1_-_1615730-1617289	0.0860106	YES	0.589856
t1558_NP_805341.1_+_1617977-1618912	0.114622	YES	0.612969
t1574_NP_805356.1_-_1633929-1634774	0.128454	YES	0.624154
t1586_NP_805368.1_+_1646262-1646768	0.0840953	YES	0.588308
t1595_NP_805377.1_-_1653140-1653808	0.0474187	YES	0.558588
t1605_NP_805384.1_+_1660431-1660931	0.144735	YES	0.637339
t1626_NP_805404.1_-_1683882-1684856	0.0699684	YES	0.576884
t1640_NP_805418.1_+_1701033-1701215	0.292303	YES	0.757114
t1641_NP_805419.1_+_1701305-1701808	0.0313532	YES	0.545476
t1655_NP_805433.1_-_1712098-1713105	0.0202558	YES	0.536368
t1658_NP_805435.1_-_1715081-1716829	0.151428	YES	0.642769
t1667_NP_805443.1_+_1727050-1727892	0.017319	YES	0.533949
t1706_NP_805482.1_-_1773836-1774093	0.073323	YES	0.579598
t1712_NP_805488.1_-_1778922-1779746	0.0848629	YES	0.588929
t1713_NP_805489.1_-_1779727-1780365	0.0469784	YES	0.558229
t1733_NP_805508.1_-_1798254-1798502	0.17153	YES	0.659102
t1736_NP_805511.1_-_1802811-1803764	0.203459	YES	0.68512
t1737_NP_805512.1_-_1803779-1805440	0.168821	YES	0.656898
t1741_NP_805516.1_-_1808317-1809099	0.338931	YES	0.793602
t1742_NP_805517.1_-_1809113-1809868	0.0552863	YES	0.564983
t1743_NP_805518.1_-_1809889-1811100	0.0595981	YES	0.568482
t1744_NP_805519.1_-_1811127-1811825	0.358192	YES	0.808166
t1745_NP_805520.1_-_1811837-1812241	0.00476727	YES	0.523565
t1746_NP_805521.1_-_1812245-1812661	0.0530612	YES	0.563175
t1748_NP_805523.1_+_1813569-1813862	0.428946	YES	0.857999
t1752_NP_805527.1_-_1817135-1817782	0.0339013	YES	0.547562
t1763_NP_805537.1_+_1825472-1826047	0.0285669	YES	0.543194
t1764_NP_805538.1_-_1826099-1827151	0.00497885	YES	0.523741
t1770_NP_805544.1_-_1832954-1834489	0.0503909	YES	0.561005
t1774_NP_805548.1_-_1837982-1838302	0.047269	YES	0.558466
t1775_NP_805549.1_-_1838434-1838760	0.353989	YES	0.805018
t1776_NP_805550.1_-_1838822-1839277	0.108883	YES	0.608332
t1781_NP_805555.1_+_1842050-1842883	0.0403903	YES	0.552861
t1800_NP_805573.1_-_1864352-1864519	0.500733	YES	0.900929
t1814_NP_805587.1_-_1877562-1878365	0.0726039	YES	0.579017
t1826_NP_805598.1_+_1889828-1889938	0.230144	YES	0.706883
t1828_NP_805600.1_+_1890441-1892126	0.145626	YES	0.638062
t1843_NP_805612.1_+_1902038-1902700	0.00934173	YES	0.527358
t1865_NP_805634.1_+_1928649-1929350	0.0558032	YES	0.565402
t1868_NP_805636.1_-_1930805-1932316	0.0641664	YES	0.572185
t1870_NP_805638.1_-_1932993-1934192	0.0851821	YES	0.589186
t1874_NP_805642.1_-_1935601-1936029	0.0102524	YES	0.528112
t1882_NP_805650.1_-_1941863-1942303	0.142837	YES	0.635801
t1886_NP_805654.1_-_1944378-1944932	0.117558	YES	0.615342
t1888_NP_805656.1_-_1945302-1945670	0.0409542	YES	0.553321
t1894_NP_805662.1_-_1950505-1951908	0.142327	YES	0.635388
t1895_NP_805663.1_-_1951874-1952626	0.014979	YES	0.532019
t1896_NP_805664.1_-_1952716-1952976	0.115659	YES	0.613807
t1902_NP_805670.1_+_1955484-1955933	0.380061	YES	0.824238
t1903_NP_805671.1_-_1956069-1956194	0.284824	YES	0.751139
t1911_NP_805679.1_-_1960634-1960795	0.067747	YES	0.575085
t1919_NP_805686.1_-_1964985-1965359	0.0220302	YES	0.537827
t1928_NP_805695.1_+_1970745-1970993	0.0162606	YES	0.533076
t1939_NP_805705.1_-_1983699-1985546	0.101537	YES	0.602398
t1943_NP_805709.1_-_1992357-1993160	0.0524798	YES	0.562703
t1954_NP_805719.1_-_2004889-2005572	0.0138039	YES	0.531048
t1972_NP_805736.1_-_2027028-2028371	0.0866486	YES	0.590371
t1975_NP_805739.1_-_2033303-2033797	0.0192163	YES	0.535512
t1983_NP_805747.1_+_2042184-2042861	0.150078	YES	0.641673
t1985_NP_805748.1_+_2043143-2043349	0.0930631	YES	0.595553
t2061_NP_805824.1_+_2122657-2124879	0.360891	YES	0.810178
t2064_NP_805826.1_+_2126426-2126566	0.272546	YES	0.741277
t2065_NP_805827.1_+_2126553-2126813	0.141273	YES	0.634533
t2086_NP_805844.1_+_2146270-2147178	0.0539709	YES	0.563914
t2088_NP_805845.1_-_2149545-2149718	0.0035034	YES	0.522515
t2101_NP_805858.1_+_2164890-2166173	0.261805	YES	0.732605
t2109_NP_805866.1_+_2172119-2173594	0.0123304	YES	0.529831
t2119_NP_805876.1_+_2183601-2183987	0.372084	YES	0.818438
t2126_NP_805880.1_-_2187782-2188570	0.252882	YES	0.725376
t2139_NP_805893.1_-_2200538-2201746	0.0203601	YES	0.536453
t2145_NP_805899.1_-_2208726-2208971	0.152685	YES	0.643789
t2153_NP_805905.1_-_2217017-2217727	0.136397	YES	0.630583
t2178_NP_805928.1_-_2245352-2245894	0.0993544	YES	0.600635
t2187_NP_805937.1_-_2253763-2254095	0.0418019	YES	0.554013
t2193_NP_805943.1_+_2262179-2263399	0.0832938	YES	0.587661
t2230_NP_805973.1_+_2296697-2297908	0.0930821	YES	0.595569
t2246_NP_805988.1_+_2310948-2312477	0.0323701	YES	0.546309
t2251_NP_805993.1_+_2316518-2316928	0.123933	YES	0.620496
t2261_NP_806003.1_+_2326975-2327721	0.0126659	YES	0.530108
t2262_NP_806004.1_+_2328038-2328940	0.155856	YES	0.646363
t2283_NP_806024.1_+_2353169-2355424	0.250089	YES	0.723109
t2297_NP_806038.1_-_2367427-2367663	0.15135	YES	0.642705
t2302_NP_806041.1_+_2370775-2371020	0.110259	YES	0.609443
t2312_NP_806046.1_+_2376599-2376910	0.0209938	YES	0.536975
t2318_NP_806052.1_-_2383126-2383818	0.100113	YES	0.601248
t2343_NP_806076.1_-_2408630-2410411	0.0487894	YES	0.559703
t2344_NP_806077.1_-_2410496-2411314	0.186732	YES	0.67148
t2356_NP_806088.1_+_2423008-2423862	0.0284126	YES	0.543067
t2385_NP_806115.1_+_2455843-2458992	0.00978043	YES	0.527721
t2392_NP_806122.1_+_2462113-2463663	0.0240619	YES	0.539497
t2394_NP_806124.1_-_2464316-2464885	0.132552	YES	0.62747
t2401_NP_806131.1_+_2472087-2473142	0.0267783	YES	0.541727
t2409_NP_806139.1_-_2480576-2480848	0.0627275	YES	0.571019
t2439_NP_806169.1_+_2511234-2511476	0.0516628	YES	0.562039
t2449_NP_806179.1_+_2519653-2520192	0.00503607	YES	0.523788
t2451_NP_806181.1_+_2521409-2521735	0.0586134	YES	0.567683
t2472_NP_806201.1_+_2545831-2546676	0.136289	YES	0.630496
t2480_NP_806208.1_-_2551575-2551895	0.0249447	YES	0.540222
t2487_NP_806215.1_-_2556912-2558006	0.0543803	YES	0.564247
t2502_NP_806230.1_-_2578120-2578344	0.0504719	YES	0.561071
t2512_NP_806238.1_-_2588886-2589245	0.133755	YES	0.628444
t2513_NP_806239.1_-_2589303-2589527	0.0366283	YES	0.54979
t2516_NP_806242.1_-_2591190-2591738	0.0384567	YES	0.551284
t2522_NP_806248.1_+_2596909-2597670	0.0394221	YES	0.552071
t2524_NP_806249.1_+_2600220-2601545	0.0162453	YES	0.533063
t2525_NP_806250.1_+_2601511-2602269	0.0561041	YES	0.565647
t2538_NP_806262.1_+_2614266-2615006	0.0665055	YES	0.57408
t2549_NP_806273.1_-_2628013-2628588	0.104056	YES	0.604433
t2554_NP_806276.1_-_2631487-2632431	0.0741707	YES	0.580284
t2559_NP_806280.1_-_2637504-2638244	0.0814134	YES	0.586141
t2561_NP_806281.1_-_2638950-2639444	0.0167487	YES	0.533478
t2565_NP_806284.1_-_2641777-2642037	0.269734	YES	0.73901
t2567_NP_806286.1_-_2644743-2645036	0.0803907	YES	0.585314
t2568_NP_806287.1_-_2645055-2645732	0.127291	YES	0.623213
t2570_NP_806289.1_-_2649818-2650264	0.215137	YES	0.694647
t2571_NP_806290.1_-_2650288-2652477	0.162601	YES	0.651842
t2576_NP_806295.1_-_2654409-2654879	0.08505	YES	0.58908
t2581_NP_806299.1_-_2661067-2662368	0.109171	YES	0.608564
t2584_NP_806302.1_-_2664315-2664800	0.0389926	YES	0.551721
t2595_NP_806312.1_+_2673143-2673637	0.102704	YES	0.603341
t2605_NP_806321.1_+_2680966-2682333	0.0380239	YES	0.55093
t2606_NP_806322.1_-_2682389-2683159	0.0810316	YES	0.585832
t2609_NP_806325.1_+_2685449-2686363	0.0880895	YES	0.591536
t2616_NP_806327.1_-_2693220-2695793	0.0418791	YES	0.554076
t2620_NP_806331.1_+_2698772-2699110	0.198298	YES	0.68091
t2636_NP_806347.1_-_2712720-2713310	0.0989935	YES	0.600343
t2659_NP_806370.1_-_2746767-2746985	0.308427	YES	0.769895
t2662_NP_806373.1_-_2748655-2751732	0.0661319	YES	0.573777
t2672_NP_806383.1_-_2762521-2764701	0.111535	YES	0.610474
t2680_NP_806390.1_+_2773394-2773513	0.225445	YES	0.703053
t2705_NP_806412.1_+_2793390-2794349	0.0462629	YES	0.557647
t2708_NP_806414.1_+_2797032-2798027	0.00541423	YES	0.524102
t2713_NP_806419.1_-_2803306-2804676	0.0793989	YES	0.584512
t2727_NP_806428.1_-_2809707-2809892	0.0204563	YES	0.536533
t2738_NP_806439.1_+_2820252-2820365	0.264713	YES	0.734957
t2767_NP_806468.1_+_2848522-2848731	0.388311	YES	0.830158
t2770_NP_806471.1_-_2851200-2851652	0.0599792	YES	0.568791
t2775_NP_806476.1_-_2853946-2854188	0.266056	YES	0.736042
t2776_NP_806477.1_-_2854213-2855391	0.0370358	YES	0.550123
t2777_NP_806478.1_+_2855707-2856636	0.22173	YES	0.700024
t2780_NP_806481.1_-_2859938-2861569	0.324754	YES	0.782671
t2784_NP_806485.1_-_2862546-2864603	0.278776	YES	0.746289
t2785_NP_806486.1_-_2864622-2865644	0.675126	YES	0.967851
t2786_NP_806487.1_-_2865714-2866943	0.691482	YES	0.971621
t2787_NP_806488.1_-_2866971-2868752	0.00770105	YES	0.525999
t2794_NP_806495.1_-_2873103-2874113	0.0383572	YES	0.551202
t2799_NP_806500.1_-_2878339-2879457	0.493168	YES	0.896818
t2802_NP_806503.1_+_2882245-2882688	0.213336	YES	0.693177
t2804_NP_806504.1_+_2883562-2883852	0.293842	YES	0.75834
t2809_NP_806508.1_-_2886117-2886443	0.16359	YES	0.652645
t2820_NP_806517.1_+_2897265-2898029	0.263507	YES	0.733982
t2826_NP_806523.1_-_2901991-2903112	0.664324	YES	0.965155
t2846_NP_806543.1_+_2921872-2922825	0.156335	YES	0.646751
t2862_NP_806558.1_+_2940621-2941739	0.108966	YES	0.608399
t2870_NP_806566.1_-_2953334-2954674	0.014036	YES	0.53124
t2938_NP_806631.1_-_3030580-3031323	0.058236	YES	0.567377
t2944_NP_806637.1_-_3037693-3037920	0.127852	YES	0.623667
t2948_NP_806641.1_-_3040062-3041183	0.0719786	YES	0.578511
t2949_NP_806642.1_-_3041285-3041695	0.0465303	YES	0.557865
t2956_NP_806648.1_-_3045592-3046344	0.122523	YES	0.619356
t2961_NP_806653.1_-_3051705-3052418	0.0664206	YES	0.574011
t2970_NP_806662.1_-_3058805-3059644	0.124222	YES	0.620731
t2978_NP_806670.1_+_3069747-3070076	0.156554	YES	0.646929
t2981_NP_806673.1_-_3072797-3073456	0.00719146	YES	0.525576
t2988_NP_806680.1_-_3079423-3080586	0.0515486	YES	0.561946
t3014_NP_806706.1_+_3103409-3103699	0.0864815	YES	0.590236
t3034_NP_806722.1_+_3119829-3120125	0.366916	YES	0.814641
t3059_NP_806745.1_-_3142008-3143063	0.120388	YES	0.61763
t3075_NP_806760.1_+_3158832-3159242	0.223675	YES	0.70161
t3107_NP_806790.1_+_3191564-3193039	0.0183918	YES	0.534833
t3122_NP_806805.1_-_3209997-3211298	0.023567	YES	0.539091
t3148_NP_806829.1_+_3239379-3239747	0.136554	YES	0.630711
t3160_NP_806840.1_-_3247997-3249361	0.203599	YES	0.685234
t3166_NP_806845.1_-_3257638-3257865	0.0960632	YES	0.597977
t3186_NP_806864.1_+_3278406-3278996	0.0682239	YES	0.575472
t3210_NP_806886.1_-_3301870-3302202	0.0351707	YES	0.548599
t3217_NP_806893.1_+_3308672-3310105	0.0356405	YES	0.548983
t3237_NP_806913.1_+_3324431-3325864	0.105682	YES	0.605746
t3238_NP_806914.1_+_3325887-3326174	0.0152271	YES	0.532223
t3264_NP_806939.1_+_3354520-3355887	0.106119	YES	0.606099
t3273_NP_806948.1_-_3365019-3365648	0.0403319	YES	0.552814
t3275_NP_806950.1_+_3367120-3367590	0.157516	YES	0.64771
t3276_NP_806951.1_+_3367955-3368218	0.00689803	YES	0.525333
t3277_NP_806952.1_+_3368322-3368588	0.00316177	YES	0.522231
t3289_NP_806964.1_-_3382612-3383655	0.0234277	YES	0.538976
t3294_NP_806969.1_+_3389192-3389662	0.0486673	YES	0.559604
t3333_NP_807001.1_+_3435638-3436591	0.062666	YES	0.570969
t3351_NP_807019.1_-_3452926-3453129	0.283087	YES	0.749748
t3361_NP_807029.1_+_3462340-3463509	0.0872502	YES	0.590857
t3383_NP_807047.1_+_3483979-3485460	0.177847	YES	0.664243
t3391_NP_807055.1_-_3492921-3493262	0.0111974	YES	0.528894
t3393_NP_807057.1_-_3493857-3495401	0.0912851	YES	0.594117
t3396_NP_807060.1_-_3498358-3498618	0.114677	YES	0.613014
t3403_NP_807066.1_+_3503271-3503492	0.0877337	YES	0.591248
t3408_NP_807071.1_+_3505098-3505325	0.0123821	YES	0.529874
t3410_NP_807073.1_+_3506176-3508590	0.0712076	YES	0.577887
t3419_NP_807082.1_+_3516382-3517440	0.0190848	YES	0.535404
t3421_NP_807084.1_+_3518127-3518654	0.0535159	YES	0.563545
t3428_NP_807091.1_+_3520893-3521339	0.0500611	YES	0.560737
t3442_NP_807104.1_+_3529670-3532747	0.0661319	YES	0.573777
t3445_NP_807107.1_+_3534417-3534635	0.270619	YES	0.739725
t3459_NP_807115.1_+_3550011-3550466	0.0107589	YES	0.528531
t3461_NP_807117.1_-_3551212-3551484	0.204038	YES	0.685592
t3478_NP_807134.1_-_3573335-3573763	0.0737053	YES	0.579908
t3505_NP_807153.1_+_3598956-3601607	0.191145	YES	0.675078
t3511_NP_807159.1_-_3609023-3609913	0.253151	YES	0.725594
t3517_NP_807165.1_-_3617767-3620199	0.0614322	YES	0.569969
t3519_NP_807167.1_+_3621627-3621944	0.00194478	YES	0.521219
t3524_NP_807171.1_+_3627867-3628892	0.0017697	YES	0.521073
t3525_NP_807172.1_+_3628986-3629981	0.02209	YES	0.537877
t3530_NP_807177.1_-_3633740-3633979	0.168497	YES	0.656635
t3536_NP_807183.1_+_3639350-3639946	0.116666	YES	0.614621
t3544_NP_807191.1_-_3646055-3647590	0.0355647	YES	0.548921
t3559_NP_807204.1_-_3659998-3660498	0.12048	YES	0.617704
t3580_NP_807223.1_-_3679571-3680671	0.414908	YES	0.848642
t3581_NP_807224.1_+_3680853-3681884	0.275013	YES	0.743263
t3593_NP_807236.1_-_3692343-3692780	0.0102212	YES	0.528086
t3615_NP_807256.1_+_3715665-3716714	0.00463091	YES	0.523452
t3618_NP_807259.1_-_3720007-3720522	0.161698	YES	0.651108
t3633_NP_807270.1_-_3737153-3738151	0.144015	YES	0.636756
t3642_NP_807279.1_-_3748414-3749406	0.0246025	YES	0.539941
t3659_NP_807296.1_+_3766087-3766662	0.0111269	YES	0.528836
t3669_NP_807305.1_+_3778446-3779219	0.0682892	YES	0.575524
t3675_NP_807311.1_-_3783767-3784669	0.0494594	YES	0.560248
t3678_NP_807314.1_-_3787571-3789217	0.153678	YES	0.644594
t3681_NP_807317.1_+_3790618-3792018	0.132686	YES	0.627578
t3685_NP_807321.1_-_3796844-3797752	0.0605022	YES	0.569215
t3689_NP_807325.1_+_3801639-3802661	0.16141	YES	0.650874
t3692_NP_807328.1_-_3805026-3807761	0.186358	YES	0.671176
t3735_NP_807368.1_+_3850335-3850622	0.135149	YES	0.629573
t3740_NP_807372.1_-_3854826-3855149	0.161146	YES	0.650659
t3757_NP_807386.1_-_3873860-3874540	0.113281	YES	0.611885
t3781_NP_807403.1_-_3903502-3904386	0.00778267	YES	0.526066
t3795_NP_807417.1_+_3914903-3915937	0.0156603	YES	0.532581
t3802_NP_807424.1_+_3921140-3922150	0.148528	YES	0.640415
t3814_NP_807436.1_-_3934235-3935518	0.0154544	YES	0.532411
t3818_NP_807440.1_+_3938132-3938599	0.103213	YES	0.603752
t3828_NP_807449.1_-_3949023-3952373	0.234986	YES	0.710827
t3839_NP_807460.1_+_3964084-3965622	0.21019	YES	0.690611
t3852_NP_807472.1_+_3978183-3978983	0.0614945	YES	0.57002
t3869_NP_807487.1_-_3996557-3997096	0.161593	YES	0.651023
t3882_NP_807499.1_-_4007605-4008612	0.0132184	YES	0.530565
t3895_NP_807510.1_-_4021827-4023398	0.0513105	YES	0.561753
t3899_NP_807514.1_+_4027231-4029531	0.104749	YES	0.604993
t3909_NP_807523.1_-_4045363-4046391	0.0179415	YES	0.534462
t3910_NP_807524.1_-_4046464-4047366	0.0139717	YES	0.531187
t3913_NP_807527.1_+_4049239-4050828	0.0610159	YES	0.569631
t3932_NP_807544.1_-_4070233-4070613	0.0993499	YES	0.600631
t3951_NP_807562.1_+_4090423-4091898	0.0831097	YES	0.587512
t3956_NP_807566.1_-_4096226-4096360	0.167616	YES	0.655919
t3969_NP_807579.1_-_4107622-4107993	0.15509	YES	0.645741
t3974_NP_807584.1_-_4112739-4113953	0.0749184	YES	0.580889
t3990_NP_807600.1_+_4134786-4135544	0.146062	YES	0.638415
t3991_NP_807601.1_-_4135618-4138323	0.099564	YES	0.600804
t3992_NP_807602.1_+_4138917-4141310	0.0823042	YES	0.586861
t4000_NP_807610.1_-_4148784-4151102	0.0213177	YES	0.537241
t4033_NP_807642.1_+_4192455-4193027	0.0892037	YES	0.592436
t4040_NP_807648.1_+_4198912-4199316	0.00735808	YES	0.525715
t4045_NP_807652.1_+_4202127-4202351	0.0343116	YES	0.547897
t4051_NP_807658.1_-_4208023-4208241	0.28198	YES	0.74886
t4059_NP_807666.1_+_4212478-4214592	0.0631355	YES	0.57135
t4066_NP_807673.1_+_4218604-4219209	0.0149038	YES	0.531956
t4070_NP_807677.1_+_4220657-4220989	0.0354929	YES	0.548863
t4073_NP_807680.1_+_4222131-4222322	0.0597344	YES	0.568592
t4076_NP_807683.1_+_4223122-4223436	0.178825	YES	0.665039
t4084_NP_807691.1_+_4226350-4226784	0.037126	YES	0.550197
t4118_NP_807722.1_+_4261801-4261902	0.318391	YES	0.777715
t4119_NP_807723.1_+_4261937-4262476	0.103173	YES	0.603719
t4121_NP_807725.1_-_4263389-4263661	0.0357134	YES	0.549043
t4128_NP_807732.1_+_4272026-4272271	0.603229	YES	0.946536
t4138_NP_807742.1_+_4283373-4284290	0.323111	YES	0.781394
t4151_NP_807755.1_-_4295317-4296300	0.0856221	YES	0.589542
t4154_NP_807758.1_+_4299077-4300270	0.126399	YES	0.622491
t4162_NP_807766.1_+_4307643-4308275	0.0440928	YES	0.55588
t4164_NP_807768.1_+_4309650-4310957	0.255797	YES	0.72774
t4166_NP_807770.1_+_4312248-4322099	0.356279	YES	0.806736
t4168_NP_807772.1_+_4328967-4331033	0.0757729	YES	0.58158
t4171_NP_807775.1_-_4333745-4334068	0.0303909	YES	0.544688
t4182_NP_807786.1_+_4345627-4345773	0.0408358	YES	0.553225
t4202_NP_807806.1_-_4367406-4368167	0.0857636	YES	0.589656
t4209_NP_807813.1_-_4378361-4378627	0.397103	YES	0.836372
t4218_NP_807820.1_-_4389128-4389511	0.099943	YES	0.60111
t4219_NP_807821.1_-_4389499-4389696	0.359813	YES	0.809375
t4221_NP_807823.1_-_4390003-4390878	0.20549	YES	0.686776
t4226_NP_807828.1_+_4394302-4395336	0.0915695	YES	0.594347
t4232_NP_807834.1_+_4400559-4401902	0.226133	YES	0.703613
t4233_NP_807835.1_+_4402488-4403267	0.166212	YES	0.654776
t4236_NP_807838.1_+_4406570-4406788	0.101853	YES	0.602653
t4239_NP_807840.1_+_4408518-4409762	0.0604717	YES	0.56919
t4244_NP_807843.1_+_4413280-4413750	0.309571	YES	0.770797
t4252_NP_807850.1_+_4419989-4421140	0.0350285	YES	0.548483
t4255_NP_807853.1_+_4423298-4424212	0.207714	YES	0.688591
t4256_NP_807854.1_+_4424231-4424971	0.171137	YES	0.658783
t4258_NP_807856.1_+_4425672-4426172	0.208131	YES	0.688931
t4267_NP_807866.1_+_4434132-4434575	0.133782	YES	0.628466
t4291_NP_807889.1_-_4456072-4457346	0.00919916	YES	0.52724
t4294_NP_807891.1_-_4458029-4458247	0.0788691	YES	0.584084
t4297_NP_807894.1_-_4459897-4462677	0.0908388	YES	0.593757
t4303_NP_807899.1_+_4465393-4466115	0.302154	YES	0.764941
t4319_NP_807914.1_-_4474736-4475800	0.142819	YES	0.635786
t4324_NP_807919.1_-_4480366-4481430	0.00488187	YES	0.52366
t4331_NP_807925.1_-_4487253-4487480	0.0556371	YES	0.565268
t4332_NP_807926.1_-_4487480-4487713	0.00670359	YES	0.525172
t4336_NP_807930.1_-_4488836-4489078	0.0324217	YES	0.546351
t4337_NP_807931.1_+_4489195-4489827	0.103386	YES	0.603891
t4341_NP_807934.1_+_4491933-4492220	0.00221148	YES	0.521441
t4345_NP_807938.1_-_4496159-4497463	0.0762593	YES	0.581974
t4349_NP_807942.1_-_4500123-4501859	0.00436989	YES	0.523235
t4350_NP_807943.1_-_4501859-4504354	0.00865998	YES	0.526793
t4370_NP_807962.1_-_4522962-4524245	0.108255	YES	0.607825
t4382_NP_807973.1_+_4534507-4536153	0.0928173	YES	0.595355
t4388_NP_807979.1_+_4539875-4540021	0.0578766	YES	0.567085
t4412_NP_808001.1_+_4563826-4564134	0.0858252	YES	0.589706
t4418_NP_808007.1_+_4569866-4570291	0.00561109	YES	0.524265
t4428_NP_808015.1_+_4578060-4579682	0.0328442	YES	0.546697
t4429_NP_808016.1_-_4579727-4580050	0.129132	YES	0.624702
t4432_NP_808019.1_-_4581392-4582147	0.0298817	YES	0.544271
t4440_NP_808027.1_-_4588214-4588489	0.00962664	YES	0.527594
t4447_NP_808034.1_-_4591523-4592158	0.0968361	YES	0.598601
t4455_NP_808042.1_+_4600391-4600777	0.0883886	YES	0.591777
t4463_NP_808050.1_+_4608048-4609781	0.218074	YES	0.697042
t4473_NP_808060.1_+_4622243-4622629	0.0118978	YES	0.529473
t4482_NP_808069.1_+_4628363-4630336	0.0782288	YES	0.583566
t4483_NP_808070.1_+_4630414-4630656	0.163073	YES	0.652225
t4487_NP_808074.1_+_4633862-4634032	0.265343	YES	0.735466
t4490_NP_808077.1_-_4637324-4638271	0.0836325	YES	0.587934
t4495_NP_808082.1_-_4642937-4643872	0.0901781	YES	0.593223
t4506_NP_808093.1_-_4653133-4653288	0.414242	YES	0.848191
t4507_NP_808094.1_-_4653368-4653856	0.00317683	YES	0.522243
t4515_NP_808102.1_-_4663719-4664717	0.0429744	YES	0.554968
t4523_NP_808108.1_-_4672212-4672451	0.00181698	YES	0.521113
t4524_NP_808109.1_-_4672455-4673315	0.150833	YES	0.642285
t4530_NP_808114.1_+_4677655-4677795	0.26307	YES	0.733629
t4538_NP_808118.1_+_4685640-4685849	0.0967506	YES	0.598532
t4556_NP_808134.1_+_4707990-4708763	0.0765453	YES	0.582205
t4557_NP_808135.1_-_4708764-4709777	0.0490771	YES	0.559937
t4571_NP_808148.1_-_4723239-4723382	0.030665	YES	0.544913
t4574_NP_808151.1_-_4724923-4726311	0.00150671	YES	0.520854
t4579_NP_808155.1_+_4733200-4733502	0.0153409	YES	0.532317
t4585_NP_808160.1_-_4741762-4742223	0.260313	YES	0.731398
t4592_NP_808167.1_-_4747017-4747475	0.0428035	YES	0.554829
t4604_NP_808176.1_+_4755368-4755985	0.0604208	YES	0.569149
t4633_NP_808202.1_-_4786630-4787313	0.0887925	YES	0.592103
t4634_NP_808203.1_-_4787384-4787929	0.0371514	YES	0.550218
t4638_NP_808207.1_+_4790711-4790851	0.0843546	YES	0.588518

## Sheet: 287_91
Protein	Score	T3S protein or Not	Probability
SG0001_YP_002225148.1_+_80-145	0.445866	YES	0.868881
SG0002_YP_002225149.1_+_227-2689	0.0590027	YES	0.567999
SG0011_YP_002225157.1_-_10731-11135	0.195834	YES	0.678901
SG0017_YP_002225163.1_-_16935-17378	0.135405	YES	0.62978
SG0024_YP_002225166.1_+_25001-25687	0.20988	YES	0.690358
SG0027_YP_002225169.1_+_29322-29867	0.0667594	YES	0.574286
SG0030_YP_002225172.1_+_31162-32007	0.0092188	YES	0.527256
SG0034_YP_002225176.1_-_34264-34704	0.141464	YES	0.634688
SG0035_YP_002225177.1_+_35227-36945	0.122347	YES	0.619214
SG0041_YP_002225183.1_+_44197-45912	0.0481309	YES	0.559167
SG0047_YP_002225187.1_-_52164-52427	0.15303	YES	0.644069
SG0085_YP_002225224.1_-_94468-94758	0.0170715	YES	0.533745
SG0095_YP_002225234.1_-_105519-107879	0.0118464	YES	0.529431
SG0113_YP_002225251.1_-_129499-130899	0.0312346	YES	0.545379
SG0115_YP_002225253.1_-_131993-133564	0.0134281	YES	0.530738
SG0135_YP_002225274.1_+_156772-157689	0.0645052	YES	0.57246
SG0136_YP_002225275.1_+_158037-158465	0.129393	YES	0.624914
SG0145_YP_002225285.1_-_167921-169267	0.0966567	YES	0.598456
SG0155_YP_002225295.1_+_180481-182364	0.209794	YES	0.690288
SG0159_YP_002225299.1_-_185405-187027	0.158898	YES	0.648833
SG0165_YP_002225305.1_+_193075-194346	0.150031	YES	0.641635
SG0168_YP_002225308.1_-_196126-196920	0.0214539	YES	0.537353
SG0179_YP_002225317.1_-_209580-210263	0.203613	YES	0.685246
SG0187_YP_002225323.1_-_215314-215793	0.0186876	YES	0.535076
SG0195_YP_002225331.1_+_225655-227844	0.150935	YES	0.642369
SG0199_YP_002225335.1_+_232574-233134	0.0557482	YES	0.565358
SG0200_YP_002225336.1_+_233220-235877	0.0273818	YES	0.542222
SG0206_YP_002225340.1_-_239131-240411	0.00102043	YES	0.52045
SG0212_YP_002225346.1_+_244765-246282	0.00993036	YES	0.527845
SG0213_YP_002225347.1_+_246412-247839	0.107229	YES	0.606996
SG0223_YP_002225357.1_+_259069-259626	0.119468	YES	0.616886
SG0229_YP_002225363.1_+_266856-267341	0.161178	YES	0.650685
SG0237_YP_002225371.1_+_276172-277887	0.0727181	YES	0.579109
SG0248_YP_002225382.1_-_286937-287341	0.246097	YES	0.719867
SG0251_YP_002225385.1_-_288960-289991	0.248132	YES	0.72152
SG0254_YP_002225388.1_-_297729-298643	0.0880895	YES	0.591536
SG0256_YP_002225390.1_+_300075-300854	0.0270564	YES	0.541955
SG0257_YP_002225391.1_+_300932-301702	0.0674938	YES	0.57488
SG0258_YP_002225392.1_-_301758-303125	0.0380239	YES	0.55093
SG0265_YP_002225399.1_+_307954-308286	0.11415	YES	0.612588
SG0308_YP_002225425.1_+_340424-340921	0.07962	YES	0.584691
SG0309_YP_002225426.1_+_341020-341736	0.145411	YES	0.637888
SG0315_YP_002225429.1_+_346779-347720	0.0706114	YES	0.577404
SG0323_YP_002225437.1_-_354973-355713	0.0665055	YES	0.57408
SG0337_YP_002225448.1_+_368727-369050	0.0756119	YES	0.58145
SG0346_YP_002225457.1_-_376970-377728	0.0413535	YES	0.553647
SG0347_YP_002225458.1_-_377694-379019	0.0172904	YES	0.533925
SG0349_YP_002225459.1_-_381569-382330	0.0394221	YES	0.552071
SG0356_YP_002225463.1_+_387488-387976	0.0384567	YES	0.551284
SG0359_YP_002225466.1_+_389696-389920	0.0721896	YES	0.578681
SG0360_YP_002225467.1_+_389978-390337	0.144955	YES	0.637518
SG0363_YP_002225470.1_-_395045-396271	0.0407212	YES	0.553131
SG0365_YP_002225472.1_+_398848-399312	0.234819	YES	0.710691
SG0370_YP_002225475.1_+_403278-406253	0.0102318	YES	0.528095
SG0373_YP_002225478.1_+_409175-409393	0.0570809	YES	0.566439
SG0389_YP_002225491.1_+_429656-430750	0.108818	YES	0.608279
SG0396_YP_002225498.1_+_435776-436096	0.0118462	YES	0.529431
SG0404_YP_002225505.1_-_440730-441641	0.0275873	YES	0.542391
SG0435_YP_002225536.1_-_475216-475458	0.0516628	YES	0.562039
SG0462_YP_002225563.1_+_505940-506212	0.0627275	YES	0.571019
SG0469_YP_002225569.1_-_512933-513988	0.027512	YES	0.542329
SG0476_YP_002225575.1_+_521190-521759	0.132552	YES	0.62747
SG0478_YP_002225577.1_-_522412-523962	0.0240619	YES	0.539497
SG0485_YP_002225584.1_-_527083-530232	0.00978043	YES	0.527721
SG0528_YP_002225620.1_+_574490-575308	0.186732	YES	0.67148
SG0529_YP_002225621.1_+_575393-577174	0.0487894	YES	0.559703
SG0551_YP_002225641.1_-_599295-599732	0.199596	YES	0.681969
SG0555_YP_002225645.1_+_601995-602516	0.0362318	YES	0.549466
SG0557_YP_002225647.1_+_603178-603870	0.109603	YES	0.608913
SG0563_YP_002225653.1_-_610086-610397	0.0782115	YES	0.583552
SG0566_YP_002225655.1_-_612029-612247	0.305571	YES	0.767643
SG0570_YP_002225659.1_-_615976-616221	0.216307	YES	0.6956
SG0575_YP_002225662.1_+_619640-619876	0.129525	YES	0.625021
SG0584_YP_002225670.1_-_628466-629047	0.0059476	YES	0.524545
SG0589_YP_002225675.1_-_631878-634133	0.23818	YES	0.713427
SG0610_YP_002225696.1_-_658363-659265	0.155856	YES	0.646363
SG0611_YP_002225697.1_-_659582-660328	0.0310443	YES	0.545224
SG0620_YP_002225706.1_-_669674-670084	0.123933	YES	0.620496
SG0625_YP_002225710.1_-_674159-675688	0.056906	YES	0.566297
SG0641_YP_002225726.1_-_688730-689941	0.0824484	YES	0.586977
SG0659_YP_002225742.1_+_708514-709221	0.00358807	YES	0.522585
SG0662_YP_002225745.1_+_711355-712827	0.00901779	YES	0.52709
SG0663_YP_002225746.1_-_712849-714528	0.0307365	YES	0.544972
SG0679_YP_002225761.1_-_731897-733117	0.0832938	YES	0.587661
SG0685_YP_002225767.1_+_741409-741741	0.0280318	YES	0.542755
SG0694_YP_002225776.1_+_749703-750152	0.0664888	YES	0.574066
SG0733_YP_002225815.1_+_795542-796330	0.252882	YES	0.725376
SG0737_YP_002225819.1_-_800113-800499	0.364022	YES	0.812502
SG0764_YP_002225846.1_-_827329-828645	0.250807	YES	0.723692
SG0777_YP_002225859.1_+_843805-843978	0.0475703	YES	0.558711
SG0780_YP_002225860.1_-_846346-847254	0.0539709	YES	0.563914
SG0802_YP_002225881.1_-_867470-867730	0.141273	YES	0.634533
SG0805_YP_002225884.1_-_869409-871631	0.360891	YES	0.810178
SG0835_YP_002225908.1_+_902978-903493	0.0196558	YES	0.535874
SG0837_YP_002225910.1_+_904276-905229	0.0749115	YES	0.580884
SG0840_YP_002225913.1_-_908826-909716	0.0365953	YES	0.549763
SG0893_YP_002225960.1_-_960668-961345	0.132309	YES	0.627274
SG0902_YP_002225968.1_+_969731-970225	0.0406166	YES	0.553046
SG0905_YP_002225971.1_+_975176-976519	0.0866486	YES	0.590371
SG0922_YP_002225988.1_+_997979-998662	0.0138039	YES	0.531048
SG0937_YP_002226003.1_+_1018004-1019854	0.114514	YES	0.612882
SG0967_YP_002226033.1_-_1056218-1056880	0.00934173	YES	0.527358
SG0971_YP_002226037.1_+_1059313-1059861	0.0606839	YES	0.569362
SG0972_YP_002226038.1_+_1059887-1060666	0.151513	YES	0.642838
SG0980_YP_002226045.1_-_1065368-1067053	0.145626	YES	0.638062
SG0982_YP_002226047.1_-_1067556-1067666	0.134558	YES	0.629094
SG0988_YP_002226053.1_-_1072863-1074425	0.098225	YES	0.599723
SG0991_YP_002226056.1_+_1076644-1078110	0.0217844	YES	0.537625
SG0994_YP_002226059.1_+_1079496-1080299	0.0726039	YES	0.579017
SG1002_YP_002226067.1_+_1087292-1087654	0.0413441	YES	0.553639
SG1009_YP_002226074.1_+_1093342-1093509	0.48491	YES	0.892216
SG1039_YP_002226098.1_-_1128634-1129728	0.166213	YES	0.654777
SG1041_YP_002226100.1_-_1131957-1133429	0.097845	YES	0.599416
SG1042_YP_002226101.1_-_1133720-1134232	0.176546	YES	0.663184
SG1047_YP_002226105.1_+_1142197-1142601	0.0967737	YES	0.59855
SG1056_YP_002226110.1_-_1150780-1151559	0.197284	YES	0.680083
SG1058_YP_002226112.1_+_1152102-1152479	0.207099	YES	0.688089
SG1059_YP_002226113.1_+_1153019-1153231	0.00206965	YES	0.521323
SG1077_YP_002226129.1_-_1167122-1167499	0.00255621	YES	0.521727
SG1085_YP_002226137.1_-_1173239-1174234	0.136051	YES	0.630303
SG1087_YP_002226139.1_+_1176120-1176434	0.00488914	YES	0.523666
SG1093_YP_002226145.1_-_1180823-1181191	0.0493998	YES	0.560199
SG1095_YP_002226147.1_-_1181613-1183019	0.521219	YES	0.91155
SG1096_YP_002226148.1_+_1183275-1184792	0.682222	YES	0.969532
SG1103_YP_002226155.1_+_1190376-1191128	0.0283602	YES	0.543025
SG1105_YP_002226157.1_-_1192150-1192374	0.210306	YES	0.690705
SG1158_YP_002226201.1_+_1240883-1241812	0.118863	YES	0.616397
SG1164_YP_002226207.1_-_1246947-1248389	0.139788	YES	0.633331
SG1165_YP_002226208.1_-_1248513-1249382	0.0132535	YES	0.530594
SG1172_YP_002226215.1_+_1256138-1256797	0.00128925	YES	0.520673
SG1176_YP_002226219.1_-_1260584-1260814	0.00358065	YES	0.522579
SG1177_YP_002226220.1_+_1260946-1261326	0.051692	YES	0.562063
SG1183_YP_002226226.1_-_1265107-1265937	0.0826933	YES	0.587175
SG1185_YP_002226228.1_-_1268761-1269096	0.076593	YES	0.582243
SG1189_YP_002226232.1_-_1270664-1271062	0.0287959	YES	0.543382
SG1190_YP_002226233.1_-_1271197-1271361	0.0979599	YES	0.599509
SG1202_YP_002226242.1_+_1279550-1280239	0.0335263	YES	0.547255
SG1205_YP_002226244.1_-_1281234-1281683	0.466655	YES	0.881624
SG1210_YP_002226249.1_+_1284476-1285009	0.136899	YES	0.63099
SG1213_YP_002226252.1_+_1288727-1290856	0.11715	YES	0.615012
SG1221_YP_002226260.1_+_1294052-1297105	0.0016846	YES	0.521002
SG1230_YP_002226267.1_+_1304278-1304520	0.200032	YES	0.682324
SG1232_YP_002226268.1_+_1306541-1307110	0.214326	YES	0.693985
SG1233_YP_002226269.1_-_1307312-1308034	0.354109	YES	0.805109
SG1235_YP_002226270.1_-_1308514-1309314	0.230797	YES	0.707415
SG1240_YP_002226271.1_-_1312929-1313096	0.0478875	YES	0.558969
SG1241_YP_002226272.1_+_1313404-1313895	0.056822	YES	0.566229
SG1254_YP_002226277.1_+_1322256-1323416	0.0804862	YES	0.585391
SG1255_YP_002226278.1_-_1323609-1323749	0.369581	YES	0.816603
SG1256_YP_002226279.1_-_1323915-1324184	0.00440171	YES	0.523261
SG1260_YP_002226282.1_-_1326155-1326550	0.0470806	YES	0.558313
SG1261_YP_002226283.1_+_1327234-1327956	0.384411	YES	0.82737
SG1280A_YP_002226299.1_+_1343932-1344075	0.258384	YES	0.729836
SG1303_YP_002226321.1_-_1367054-1367761	0.00209532	YES	0.521344
SG1360_YP_002226374.1_-_1428215-1429057	0.017319	YES	0.533949
SG1369_YP_002226383.1_+_1439375-1441006	0.117594	YES	0.615371
SG1372_YP_002226386.1_+_1442983-1443990	0.0202558	YES	0.536368
SG1386_YP_002226399.1_-_1454280-1454783	0.0476968	YES	0.558814
SG1387_YP_002226400.1_-_1454873-1455055	0.292303	YES	0.757114
SG1401_YP_002226414.1_+_1471232-1472206	0.0699684	YES	0.576884
SG1426_YP_002226433.1_+_1498200-1498868	0.0418027	YES	0.554013
SG1434_YP_002226441.1_-_1504525-1505031	0.0859127	YES	0.589777
SG1450_YP_002226453.1_+_1519437-1520261	0.106105	YES	0.606088
SG1462_YP_002226463.1_+_1530228-1531601	0.0660909	YES	0.573744
SG1463_YP_002226464.1_-_1531645-1532580	0.114622	YES	0.612969
SG1466_YP_002226466.1_-_1533324-1533758	0.0149321	YES	0.53198
SG1488_YP_002226486.1_-_1557372-1558598	0.0246757	YES	0.540001
SG1490_YP_002226488.1_-_1559869-1560270	0.197948	YES	0.680625
SG1493_YP_002226491.1_+_1562387-1564012	0.00818452	YES	0.5264
SG1498_YP_002226496.1_+_1570260-1570835	0.204691	YES	0.686125
SG1499_YP_002226497.1_-_1571013-1571732	0.255177	YES	0.727237
SG1537_YP_002226530.1_+_1607907-1608572	0.052429	YES	0.562662
SG1562_YP_002226550.1_-_1638754-1638897	0.101118	YES	0.602059
SG1600_YP_002226579.1_+_1673331-1673720	0.0351052	YES	0.548546
SG1606_YP_002226585.1_-_1678561-1678743	0.33373	YES	0.789611
SG1609_YP_002226588.1_+_1682144-1682830	0.0388799	YES	0.551629
SG1617_YP_002226594.1_+_1689169-1689510	0.106064	YES	0.606054
SG1620_YP_002226597.1_+_1690961-1691269	0.15641	YES	0.646813
SG1627_YP_002226602.1_+_1699333-1700235	0.0377515	YES	0.550708
SG1629_YP_002226604.1_+_1700892-1702040	0.06248	YES	0.570818
SG1631_YP_002226606.1_-_1703421-1704116	0.00203294	YES	0.521292
SG1633_YP_002226608.1_-_1705590-1706489	0.00450584	YES	0.523348
SG1635_YP_002226609.1_+_1708257-1708505	0.627386	YES	0.954611
SG1648_YP_002226621.1_-_1723840-1725243	0.0751392	YES	0.581068
SG1673_YP_002226643.1_+_1748223-1748690	0.0193395	YES	0.535613
SG1686_YP_002226655.1_+_1758084-1758938	0.49572	YES	0.898217
SG1688_YP_002226657.1_+_1760114-1761139	0.0344963	YES	0.548048
SG1704_YP_002226673.1_-_1775814-1776830	0.150465	YES	0.641987
SG1705_YP_002226674.1_-_1776796-1777470	0.071332	YES	0.577987
SG1708_YP_002226677.1_-_1778779-1779027	0.191664	YES	0.675501
SG1710_YP_002226679.1_-_1779307-1779522	0.214676	YES	0.69427
SG1711_YP_002226680.1_-_1779616-1780305	0.0981977	YES	0.599701
SG1712_YP_002226681.1_-_1780302-1781084	0.151219	YES	0.642598
SG1715_YP_002226684.1_-_1782005-1782592	0.120083	YES	0.617383
SG1716_YP_002226685.1_-_1782608-1784062	0.364765	YES	0.813052
SG1718_YP_002226687.1_-_1784535-1785125	0.0669739	YES	0.574459
SG1719_YP_002226688.1_-_1785132-1785455	0.342692	YES	0.796473
SG1724_YP_002226693.1_+_1789400-1792162	0.0599731	YES	0.568786
SG1740_YP_002226705.1_+_1809407-1809643	0.124515	YES	0.620967
SG1741_YP_002226706.1_+_1809726-1809968	0.240563	YES	0.715367
SG1746_YP_002226710.1_-_1814082-1814828	0.0243196	YES	0.539709
SG1767_YP_002226730.1_-_1839021-1841399	0.02106	YES	0.537029
SG1770_YP_002226733.1_+_1843937-1844119	0.0696266	YES	0.576607
SG1780_YP_002226741.1_-_1852489-1853472	0.045267	YES	0.556836
SG1786_YP_002226747.1_-_1859764-1860618	0.0932586	YES	0.595711
SG1788_YP_002226748.1_+_1861071-1862030	0.13077	YES	0.626028
SG1798_YP_002226758.1_+_1869782-1872034	0.446202	YES	0.869092
SG1808_YP_002226768.1_-_1880106-1880591	0.0856999	YES	0.589605
SG1857_YP_002226807.1_+_1921932-1922180	0.204027	YES	0.685583
SG1876_YP_002226824.1_-_1938650-1939207	0.0560818	YES	0.565628
SG1877_YP_002226825.1_+_1940019-1940282	0.209122	YES	0.68974
SG1879_YP_002226826.1_+_1941032-1941553	0.189105	YES	0.673415
SG1907_YP_002226853.1_-_1973786-1974043	0.073323	YES	0.579598
SG1930_YP_002226874.1_-_1994215-1995264	0.039631	YES	0.552242
SG1938_YP_002226881.1_-_2003339-2004292	0.211828	YES	0.691947
SG1943_YP_002226884.1_-_2008845-2009627	0.338931	YES	0.793602
SG1944_YP_002226885.1_-_2009641-2010396	0.0622257	YES	0.570612
SG1945_YP_002226886.1_-_2010417-2011628	0.0595981	YES	0.568482
SG1946_YP_002226887.1_-_2011655-2012353	0.358192	YES	0.808166
SG1947_YP_002226888.1_-_2012365-2012769	0.00476727	YES	0.523565
SG1948_YP_002226889.1_-_2012773-2013189	0.0429743	YES	0.554968
SG1950_YP_002226891.1_+_2014097-2014390	0.45015	YES	0.871565
SG1958_YP_002226898.1_+_2021259-2021771	0.023466	YES	0.539008
SG1965_YP_002226905.1_+_2026002-2026577	0.0285669	YES	0.543194
SG1972_YP_002226912.1_-_2033484-2035019	0.0503909	YES	0.561005
SG1976_YP_002226916.1_-_2038511-2038831	0.0307168	YES	0.544955
SG1977_YP_002226917.1_-_2038962-2039288	0.289736	YES	0.755066
SG1978_YP_002226918.1_-_2039350-2039805	0.0711536	YES	0.577843
SG1983_YP_002226923.1_+_2042664-2043410	0.106253	YES	0.606207
SG1997_YP_002226931.1_-_2053951-2054199	0.458433	YES	0.876668
SG2001_YP_002226934.1_+_2056495-2057376	0.591177	YES	0.942139
SG2011_YP_002226941.1_+_2065980-2066357	0.0249901	YES	0.54026
SG2015_YP_002226945.1_-_2069586-2069855	0.193245	YES	0.67679
SG2016_YP_002226946.1_+_2071152-2071949	0.0872019	YES	0.590818
SG2018_YP_002226948.1_+_2072851-2073336	0.0941761	YES	0.596452
SG2027_YP_002226956.1_+_2078947-2079471	0.306441	YES	0.768329
SG2028_YP_002226957.1_+_2079562-2079963	0.059063	YES	0.568048
SG2030_YP_002226959.1_+_2080992-2083160	0.241621	YES	0.716227
SG2031_YP_002226960.1_+_2083217-2084947	0.0994967	YES	0.60075
SG2069_YP_002226988.1_+_2114828-2115349	0.272053	YES	0.74088
SG2075_YP_002226992.1_+_2118319-2118951	0.118068	YES	0.615754
SG2080_YP_002226995.1_+_2120698-2122092	0.111249	YES	0.610244
SG2094_YP_002227009.1_-_2133150-2135426	0.0166143	YES	0.533368
SG2102_YP_002227015.1_+_2145050-2146354	0.0049816	YES	0.523743
SG2117_YP_002227030.1_-_2162304-2163305	0.0387128	YES	0.551493
SG2121_YP_002227034.1_-_2166569-2167882	0.156357	YES	0.64677
SG2136_YP_002227049.1_-_2184114-2185550	0.0502911	YES	0.560924
SG2145_YP_002227057.1_-_2191880-2193097	0.0394549	YES	0.552098
SG2148_YP_002227060.1_-_2194514-2196673	0.0829016	YES	0.587344
SG2178_YP_002227085.1_-_2234194-2234940	0.042037	YES	0.554204
SG2187_YP_002227092.1_-_2242436-2242717	0.10521	YES	0.605365
SG2204_YP_002227107.1_-_2260053-2260961	0.196379	YES	0.679345
SG2209_YP_002227110.1_-_2263358-2264794	0.0844168	YES	0.588568
SG2242_YP_002227140.1_-_2299675-2300532	0.0343337	YES	0.547915
SG2246A_YP_002227145.1_+_2304788-2304979	0.179255	YES	0.66539
SG2257_YP_002227153.1_+_2314545-2316134	0.117251	YES	0.615094
SG2265_YP_002227161.1_+_2323050-2323277	0.362331	YES	0.811248
SG2315_YP_002227204.1_+_2379728-2380681	0.0986306	YES	0.60005
SG2358_YP_002227245.1_-_2424814-2424966	0.0356732	YES	0.54901
SG2361_YP_002227248.1_+_2428224-2428823	0.0383738	YES	0.551216
SG2367_YP_002227254.1_+_2434152-2436296	0.131697	YES	0.626778
SG2372_YP_002227259.1_-_2441268-2441540	0.117654	YES	0.615419
SG2401_YP_002227285.1_+_2468528-2469529	0.246339	YES	0.720063
SG2422_YP_002227305.1_+_2487323-2488636	0.0367296	YES	0.549873
SG2448_YP_002227325.1_+_2519193-2519555	0.264541	YES	0.734818
SG2456_YP_002227332.1_-_2526493-2527419	0.0979496	YES	0.5995
SG2463_YP_002227339.1_+_2534309-2534566	0.021972	YES	0.53778
SG2468_YP_002227344.1_+_2538241-2539533	0.0988356	YES	0.600216
SG2502_YP_002227377.1_-_2568134-2570413	0.00460496	YES	0.52343
SG2505_YP_002227380.1_-_2573718-2573948	0.0946751	YES	0.596855
SG2510_YP_002227385.1_+_2579917-2581617	0.0729862	YES	0.579326
SG2518_YP_002227392.1_-_2591147-2592181	0.00329875	YES	0.522345
SG2544_YP_002227415.1_+_2617785-2619134	0.0616974	YES	0.570184
SG2559_YP_002227424.1_-_2649048-2650052	0.166874	YES	0.655315
SG2567_YP_002227432.1_-_2659410-2664344	0.0282582	YES	0.542941
SG2594_YP_002227455.1_+_2688209-2689750	0.0297614	YES	0.544173
SG2602_YP_002227463.1_-_2699829-2703716	0.0611672	YES	0.569754
SG2620_YP_002227480.1_-_2718346-2720145	0.0565149	YES	0.56598
SG2627_YP_002227487.1_+_2725984-2727318	0.0390219	YES	0.551745
SG2632_YP_002227492.1_-_2730494-2731531	0.0648144	YES	0.57271
SG2640_YP_002227500.1_-_2745157-2747730	0.0476228	YES	0.558754
SG2644_YP_002227504.1_+_2750709-2751047	0.198298	YES	0.68091
SG2659_YP_002227519.1_-_2764567-2765157	0.0989935	YES	0.600343
SG2668_YP_002227526.1_+_2782084-2783493	0.00277505	YES	0.521909
SG2683_YP_002227534.1_-_2799369-2801549	0.0989624	YES	0.600318
SG2701_YP_002227547.1_-_2820920-2821369	0.0575758	YES	0.566841
SG2715_YP_002227559.1_+_2830402-2831361	0.0462629	YES	0.557647
SG2724_YP_002227566.1_-_2840318-2841688	0.123891	YES	0.620463
SG2729_YP_002227571.1_-_2846440-2846625	0.0204563	YES	0.536533
SG2768_YP_002227610.1_-_2885362-2886270	0.0502254	YES	0.560871
SG2771_YP_002227613.1_-_2888803-2889255	0.0684332	YES	0.575641
SG2776_YP_002227618.1_-_2891539-2891781	0.0886362	YES	0.591977
SG2777_YP_002227619.1_-_2891806-2892984	0.105683	YES	0.605746
SG2778_YP_002227620.1_+_2893300-2894229	0.201999	YES	0.683929
SG2781_YP_002227623.1_-_2897535-2899166	0.348484	YES	0.800869
SG2784_YP_002227626.1_-_2900143-2902200	0.317661	YES	0.777144
SG2785_YP_002227627.1_-_2902219-2903250	0.657982	YES	0.963493
SG2786_YP_002227628.1_-_2903321-2904550	0.691482	YES	0.971621
SG2787_YP_002227629.1_-_2904578-2906359	0.00770105	YES	0.525999
SG2794_YP_002227636.1_-_2910710-2911720	0.0392763	YES	0.551952
SG2799_YP_002227641.1_-_2915946-2917064	0.520592	YES	0.911236
SG2802_YP_002227644.1_+_2919852-2920295	0.213336	YES	0.693177
SG2805_YP_002227645.1_+_2921158-2921448	0.251353	YES	0.724135
SG2811_YP_002227650.1_-_2925273-2925683	0.140335	YES	0.633773
SG2822_YP_002227661.1_+_2937387-2938151	0.263507	YES	0.733982
SG2828_YP_002227667.1_-_2942112-2943245	0.776375	YES	0.985938
SG2848_YP_002227686.1_+_2961320-2962273	0.153318	YES	0.644302
SG2851_YP_002227689.1_-_2964909-2966528	8.69252e-05	YES	0.519672
SG2859_YP_002227696.1_+_2974877-2975464	0.0195206	YES	0.535762
SG2862_YP_002227699.1_+_2979133-2979552	0.0657429	YES	0.573462
SG2865_YP_002227702.1_+_2980625-2981656	0.00170378	YES	0.521018
SG2933_YP_002227763.1_-_3062948-3063706	0.109883	YES	0.60914
SG2938_YP_002227768.1_-_3069061-3069723	0.0657179	YES	0.573442
SG2955_YP_002227785.1_+_3087099-3087428	0.156554	YES	0.646929
SG2958_YP_002227788.1_-_3090150-3090809	0.00719146	YES	0.525576
SG2964_YP_002227794.1_-_3096072-3097235	0.0515486	YES	0.561946
SG2980_YP_002227810.1_-_3113395-3114126	0.0241144	YES	0.53954
SG2996_YP_002227826.1_+_3127576-3127866	0.0864815	YES	0.590236
SG3011_YP_002227838.1_-_3141722-3142156	0.204059	YES	0.685609
SG3032_YP_002227859.1_-_3165961-3167016	0.120388	YES	0.61763
SG3052_YP_002227873.1_+_3183000-3183410	0.212699	YES	0.692657
SG3066_YP_002227887.1_+_3196932-3197915	0.0151913	YES	0.532194
SG3083_YP_002227903.1_+_3213902-3215377	0.0183918	YES	0.534833
SG3098_YP_002227918.1_-_3232334-3233635	0.023567	YES	0.539091
SG3108_YP_002227927.1_+_3241731-3243578	0.0868556	YES	0.590539
SG3124_YP_002227941.1_+_3261719-3262087	0.136554	YES	0.630711
SG3157_YP_002227971.1_+_3295047-3295637	0.0682239	YES	0.575472
SG3171_YP_002227985.1_-_3305488-3307344	0.0213608	YES	0.537277
SG3179_YP_002227993.1_-_3317113-3317577	0.0171248	YES	0.533789
SG3183_YP_002227995.1_-_3320839-3321171	0.0351707	YES	0.548599
SG3190_YP_002228002.1_+_3327641-3329074	0.0295539	YES	0.544003
SG3203_YP_002228015.1_-_3337934-3338746	0.0623554	YES	0.570717
SG3210_YP_002228022.1_+_3343398-3344831	0.144945	YES	0.63751
SG3238_YP_002228050.1_+_3374402-3375769	0.106685	YES	0.606556
SG3248_YP_002228060.1_-_3384898-3385527	0.0403319	YES	0.552814
SG3250_YP_002228062.1_+_3387000-3387470	0.157516	YES	0.64771
SG3251_YP_002228063.1_+_3387835-3388098	0.00639028	YES	0.524912
SG3252_YP_002228064.1_+_3388202-3388468	0.00316177	YES	0.522231
SG3259_YP_002228071.1_-_3394912-3398625	0.0545803	YES	0.564409
SG3264_YP_002228076.1_-_3402492-3403535	0.0234277	YES	0.538976
SG3270_YP_002228081.1_+_3409071-3409541	0.0486673	YES	0.559604
SG3296_YP_002228105.1_+_3444433-3447084	0.191145	YES	0.675078
SG3311_YP_002228116.1_-_3462918-3463808	0.253151	YES	0.725594
SG3319_YP_002228124.1_-_3473114-3475546	0.0614322	YES	0.569969
SG3321_YP_002228126.1_+_3476974-3477291	0.00194478	YES	0.521219
SG3322_YP_002228127.1_+_3477748-3479538	0.0211396	YES	0.537095
SG3326_YP_002228131.1_+_3483215-3484240	0.0017697	YES	0.521073
SG3327_YP_002228132.1_+_3484334-3485308	0.02209	YES	0.537877
SG3332_YP_002228137.1_-_3489067-3489306	0.250163	YES	0.723169
SG3338_YP_002228143.1_+_3494679-3495275	0.116666	YES	0.614621
SG3346_YP_002228151.1_-_3501383-3502918	0.021083	YES	0.537048
SG3361_YP_002228163.1_-_3515330-3515830	0.130306	YES	0.625652
SG3383_YP_002228181.1_-_3535324-3536349	0.350151	YES	0.802129
SG3397_YP_002228193.1_-_3548053-3548490	0.0119644	YES	0.529528
SG3406_YP_002228200.1_+_3556000-3558036	0.0278398	YES	0.542598
SG3418_YP_002228212.1_+_3571377-3572426	0.00463091	YES	0.523452
SG3434_YP_002228227.1_+_3596952-3597407	0.0107589	YES	0.528531
SG3436_YP_002228229.1_-_3598153-3598425	0.204038	YES	0.685592
SG3448_YP_002228241.1_-_3608263-3608451	0.0047458	YES	0.523547
SG3458_YP_002228249.1_-_3621550-3621978	0.0737053	YES	0.579908
SG3487_YP_002228278.1_+_3660319-3661272	0.062666	YES	0.570969
SG3503_YP_002228294.1_-_3677565-3677768	0.283087	YES	0.749748
SG3511_YP_002228300.1_+_3683945-3685084	0.113866	YES	0.612358
SG3529_YP_002228317.1_+_3704916-3706397	0.177847	YES	0.664243
SG3535_YP_002228322.1_-_3711902-3712243	0.00687377	YES	0.525313
SG3537_YP_002228324.1_-_3712840-3714384	0.0912851	YES	0.594117
SG3540_YP_002228327.1_-_3717344-3717604	0.114677	YES	0.613014
SG3542_YP_002228329.1_+_3719839-3721359	0.132765	YES	0.627643
SG3547_YP_002228334.1_-_3731079-3732077	0.135754	YES	0.630063
SG3580_YP_002228363.1_+_3767122-3767895	0.0682892	YES	0.575524
SG3589_YP_002228372.1_-_3776163-3777809	0.193128	YES	0.676694
SG3593_YP_002228376.1_+_3779210-3780610	0.108533	YES	0.608049
SG3597_YP_002228380.1_-_3785398-3786294	0.0390291	YES	0.551751
SG3650_YP_002228428.1_-_3839196-3839519	0.152829	YES	0.643905
SG3660_YP_002228438.1_+_3849003-3850112	0.00761775	YES	0.52593
SG3668_YP_002228444.1_-_3858029-3858709	0.102841	YES	0.603451
SG3694_YP_002228462.1_-_3887441-3888322	0.0170218	YES	0.533704
SG3695_YP_002228463.1_+_3888441-3889298	0.0142793	YES	0.531441
SG3708_YP_002228476.1_+_3898839-3899873	0.0156603	YES	0.532581
SG3711_YP_002228479.1_+_3901816-3902049	0.0243822	YES	0.53976
SG3714_YP_002228482.1_+_3904235-3905248	0.19058	YES	0.674617
SG3715_YP_002228483.1_+_3905271-3905969	0.034234	YES	0.547834
SG3726_YP_002228493.1_-_3917133-3918416	0.0145993	YES	0.531705
SG3730_YP_002228497.1_+_3921031-3921498	0.103213	YES	0.603752
SG3750_YP_002228517.1_+_3947861-3949399	0.170912	YES	0.6586
SG3758_YP_002228523.1_-_3956412-3957398	0.165585	YES	0.654267
SG3764_YP_002228529.1_+_3961956-3962756	0.0614945	YES	0.57002
SG3783_YP_002228543.1_-_3980315-3980854	0.161593	YES	0.651023
SG3794_YP_002228554.1_+_3990311-3991009	0.15468	YES	0.645408
SG3798_YP_002228556.1_+_3994662-3995189	0.0698311	YES	0.576773
SG3814_YP_002228564.1_-_4011404-4012975	0.0513105	YES	0.561753
SG3818_YP_002228567.1_+_4016808-4019108	0.149189	YES	0.640951
SG3828_YP_002228576.1_-_4034881-4035909	0.0179415	YES	0.534462
SG3829_YP_002228577.1_-_4035982-4036881	0.00643712	YES	0.524951
SG3833_YP_002228579.1_+_4038753-4040342	0.0738357	YES	0.580013
SG3839_YP_002228585.1_+_4046543-4047586	0.041104	YES	0.553444
SG3866_YP_002228612.1_+_4077360-4078835	0.0767471	YES	0.582368
SG3871_YP_002228617.1_-_4083163-4083297	0.167616	YES	0.655919
SG3885_YP_002228631.1_-_4094875-4095291	0.166192	YES	0.65476
SG3890_YP_002228635.1_-_4100036-4101250	0.0749184	YES	0.580889
SG3916_YP_002228655.1_+_4130596-4131354	0.146062	YES	0.638415
SG3923_YP_002228662.1_-_4137997-4140702	0.126097	YES	0.622247
SG3924_YP_002228663.1_+_4141296-4143689	0.099082	YES	0.600415
SG3932_YP_002228671.1_-_4151160-4153478	0.0307273	YES	0.544964
SG3967_YP_002228703.1_+_4194954-4195526	0.0815812	YES	0.586276
SG3974_YP_002228710.1_+_4201411-4201815	0.0147274	YES	0.531811
SG3985_YP_002228719.1_-_4210623-4210841	0.267977	YES	0.737593
SG3993_YP_002228727.1_+_4215077-4217191	0.0631355	YES	0.57135
SG4000_YP_002228734.1_+_4221203-4221808	0.0149038	YES	0.531956
SG4004_YP_002228738.1_+_4223256-4223588	0.0354929	YES	0.548863
SG4007_YP_002228741.1_+_4224730-4224921	0.0597344	YES	0.568592
SG4010_YP_002228744.1_+_4225721-4226035	0.148352	YES	0.640272
SG4018_YP_002228752.1_+_4228949-4229383	0.037126	YES	0.550197
SG4051_YP_002228784.1_+_4264609-4264710	0.424428	YES	0.855019
SG4052_YP_002228785.1_+_4264745-4265284	0.143532	YES	0.636364
SG4054_YP_002228787.1_-_4266197-4266469	0.0357134	YES	0.549043
SG4064_YP_002228795.1_+_4277382-4277627	0.603229	YES	0.946536
SG4075_YP_002228805.1_+_4288731-4289648	0.323111	YES	0.781394
SG4088_YP_002228818.1_-_4300672-4301655	0.0507942	YES	0.561333
SG4091_YP_002228821.1_+_4304432-4305625	0.105108	YES	0.605282
SG4100_YP_002228829.1_+_4312986-4313618	0.0432809	YES	0.555218
SG4102_YP_002228831.1_+_4314993-4316312	0.255797	YES	0.72774
SG4104_YP_002228833.1_+_4317603-4334282	0.334147	YES	0.789932
SG4105_YP_002228834.1_+_4334322-4336388	0.0757729	YES	0.58158
SG4109_YP_002228836.1_-_4339091-4339414	0.00406504	YES	0.522982
SG4120_YP_002228847.1_+_4350980-4351126	0.0408358	YES	0.553225
SG4140_YP_002228867.1_-_4372775-4373536	0.140058	YES	0.633549
SG4147_YP_002228872.1_-_4383740-4384006	0.284883	YES	0.751186
SG4157_YP_002228880.1_-_4395322-4395609	0.00994983	YES	0.527862
SG4158_YP_002228881.1_-_4395606-4396481	0.20549	YES	0.686776
SG4163_YP_002228886.1_-_4399109-4399243	0.205731	YES	0.686973
SG4173_YP_002228894.1_+_4408306-4409952	0.0928173	YES	0.595355
SG4179_YP_002228899.1_+_4413674-4413820	0.0578766	YES	0.567085
SG4202_YP_002228920.1_+_4437792-4438100	0.108139	YES	0.607731
SG4207_YP_002228925.1_+_4443818-4444243	0.0194097	YES	0.535671
SG4220_YP_002228934.1_-_4454477-4454797	0.0798263	YES	0.584858
SG4223_YP_002228937.1_-_4456142-4456897	0.0307833	YES	0.54501
SG4231_YP_002228945.1_-_4462964-4463239	0.0180611	YES	0.53456
SG4232_YP_002228946.1_+_4463405-4463638	0.0788421	YES	0.584062
SG4238_YP_002228952.1_-_4466272-4466907	0.0832593	YES	0.587633
SG4246_YP_002228959.1_-_4474204-4475052	0.042572	YES	0.55464
SG4247_YP_002228960.1_+_4475140-4475526	0.0883886	YES	0.591777
SG4254_YP_002228967.1_+_4482077-4483810	0.218074	YES	0.697042
SG4264_YP_002228976.1_+_4496270-4496656	0.0118978	YES	0.529473
SG4274_YP_002228985.1_+_4504441-4504683	0.163073	YES	0.652225
SG4278_YP_002228989.1_+_4507890-4508060	0.265343	YES	0.735466
SG4281_YP_002228991.1_-_4511348-4512295	0.13001	YES	0.625413
SG4286_YP_002228995.1_-_4516961-4517896	0.0901781	YES	0.593223
SG4297_YP_002229005.1_-_4527366-4527854	0.00317683	YES	0.522243
SG4305_YP_002229013.1_-_4537660-4538658	0.0429744	YES	0.554968
SG4313_YP_002229019.1_+_4545096-4545344	0.0672046	YES	0.574646
SG4319_YP_002229023.1_+_4548688-4549428	0.010452	YES	0.528277
SG4336_YP_002229034.1_+_4566416-4567189	0.0765453	YES	0.582205
SG4337_YP_002229035.1_-_4567190-4568203	0.0443444	YES	0.556085
SG4356_YP_002229050.1_-_4587685-4588263	0.156527	YES	0.646907
SG4359_YP_002229053.1_+_4591391-4591693	0.0153409	YES	0.532317
SG4372_YP_002229066.1_-_4607737-4608198	0.260313	YES	0.731398
SG4379_YP_002229073.1_-_4612992-4613450	0.0678591	YES	0.575176
SG4388_YP_002229082.1_+_4621119-4621736	0.0604208	YES	0.569149
SG4417_YP_002229107.1_-_4654004-4654549	0.0371514	YES	0.550218
SG4419_YP_002229109.1_-_4655944-4656258	0.184173	YES	0.669396
SG4421_YP_002229111.1_+_4657337-4657477	0.0843546	YES	0.588518

## Sheet: AKU_12601
Protein	Score	T3S protein or Not	Probability
SSPA0001_YP_002140848.1_+_229-294	0.445866	YES	0.868881
SSPA0002_YP_002140849.1_+_376-2838	0.0590027	YES	0.567999
SSPA0004_YP_002140851.1_+_3773-5059	0.0382215	YES	0.551092
SSPA0010_YP_002140858.1_-_10880-11284	0.18762	YES	0.672205
SSPA0016_YP_002140864.1_-_17076-17519	0.169352	YES	0.65733
SSPA0017_YP_002140865.1_+_20031-23087	0.069956	YES	0.576874
SSPA0020_YP_002140868.1_+_25145-25831	0.20988	YES	0.690358
SSPA0023_YP_002140871.1_+_29466-30011	0.0582534	YES	0.567391
SSPA0025_YP_002140873.1_+_31307-32152	0.0092188	YES	0.527256
SSPA0029_YP_002140877.1_-_34409-34846	0.141464	YES	0.634688
SSPA0030_YP_002140878.1_+_35369-37087	0.0930077	YES	0.595509
SSPA0035_YP_002140883.1_+_44318-46033	0.0180769	YES	0.534573
SSPA0040_YP_002140888.1_-_52286-52549	0.184337	YES	0.669529
SSPA0079_YP_002140926.1_-_94559-94849	0.0615826	YES	0.570091
SSPA0090_YP_002140936.1_-_105746-108100	0.0118464	YES	0.529431
SSPA0109_YP_002140954.1_-_131217-132617	0.0312346	YES	0.545379
SSPA0111_YP_002140956.1_-_133711-135282	0.0134281	YES	0.530738
SSPA0127_YP_002140972.1_+_152687-154162	0.0013	YES	0.520682
SSPA0132_YP_002140977.1_+_158479-159396	0.0645052	YES	0.57246
SSPA0133_YP_002140978.1_+_159744-160172	0.150365	YES	0.641906
SSPA0143_YP_002140988.1_-_169589-170974	0.0966567	YES	0.598456
SSPA0153_YP_002140998.1_+_182188-184077	0.216078	YES	0.695414
SSPA0157_YP_002141002.1_-_187118-188746	0.159856	YES	0.649611
SSPA0161_YP_002141006.1_+_193467-194738	0.150031	YES	0.641635
SSPA0163_YP_002141008.1_+_195721-196488	0.0130269	YES	0.530406
SSPA0164_YP_002141009.1_-_196518-197312	0.0214539	YES	0.537353
SSPA0178_YP_002141023.1_-_210304-210876	0.0741417	YES	0.580261
SSPA0179_YP_002141024.1_-_210911-213508	0.096774	YES	0.598551
SSPA0185_YP_002141030.1_-_217664-218143	0.0186876	YES	0.535076
SSPA0201_YP_002141046.1_-_241523-242803	0.00102043	YES	0.52045
SSPA0207_YP_002141052.1_+_247157-248674	0.00993036	YES	0.527845
SSPA0208_YP_002141053.1_+_248804-250231	0.107229	YES	0.606996
SSPA0218_YP_002141063.1_+_261336-261893	0.0982669	YES	0.599757
SSPA0224_YP_002141069.1_+_269102-269587	0.161178	YES	0.650685
SSPA0232_YP_002141077.1_+_278367-280130	0.052416	YES	0.562651
SSPA0243_YP_002141088.1_-_289180-289584	0.246097	YES	0.719867
SSPA0246_YP_002141091.1_-_291203-292234	0.181888	YES	0.667534
SSPA0255_YP_002141100.1_+_306743-307780	0.0866787	YES	0.590396
SSPA0260_YP_002141105.1_-_310956-312290	0.0390219	YES	0.551745
SSPA0267_YP_002141112.1_+_318130-319929	0.0565149	YES	0.56598
SSPA0284_YP_002141129.1_+_334558-338445	0.0611672	YES	0.569754
SSPA0292_YP_002141137.1_-_350249-351439	0.0247362	YES	0.540051
SSPA0316_YP_002141161.1_+_373827-378761	0.0282582	YES	0.542941
SSPA0323_YP_002141168.1_+_388120-389124	0.166874	YES	0.655315
SSPA0332_YP_002141177.1_-_418816-420165	0.0218568	YES	0.537685
SSPA0335_YP_002141180.1_+_423527-423685	0.0387099	YES	0.55149
SSPA0336_YP_002141181.1_-_424678-425217	0.0453814	YES	0.556929
SSPA0337_YP_002141182.1_-_425233-425748	0.0187276	YES	0.535109
SSPA0356_YP_002141201.1_+_446773-447807	0.0239434	YES	0.5394
SSPA0363_YP_002141208.1_-_454039-457152	0.040679	YES	0.553097
SSPA0368_YP_002141213.1_+_465007-465237	0.0946751	YES	0.596855
SSPA0371_YP_002141216.1_+_468542-470821	0.043569	YES	0.555453
SSPA0403_YP_002141248.1_-_497703-498995	0.0988356	YES	0.600216
SSPA0407_YP_002141252.1_-_502669-502926	0.021972	YES	0.53778
SSPA0414_YP_002141259.1_+_509964-510890	0.0844518	YES	0.588596
SSPA0417_YP_002141262.1_-_513597-513959	0.264541	YES	0.734818
SSPA0437_YP_002141282.1_-_544246-545559	0.0367296	YES	0.549873
SSPA0442_YP_002141287.1_-_550636-551187	0.00487048	YES	0.523651
SSPA0457_YP_002141302.1_-_563347-564348	0.227124	YES	0.704421
SSPA0485_YP_002141330.1_+_591337-591609	0.117654	YES	0.615419
SSPA0490_YP_002141335.1_-_596581-598725	0.15742	YES	0.647632
SSPA0496_YP_002141341.1_-_604054-604653	0.0383738	YES	0.551216
SSPA0499_YP_002141344.1_+_607908-608060	0.0356732	YES	0.54901
SSPA0541_YP_002141384.1_-_649554-650507	0.101234	YES	0.602153
SSPA0584_YP_002141427.1_-_702178-702405	0.362331	YES	0.811248
SSPA0593_YP_002141436.1_-_709322-710911	0.107732	YES	0.607402
SSPA0607_YP_002141450.1_+_725074-725931	0.0343337	YES	0.547915
SSPA0630_YP_002141473.1_-_753417-754325	0.0117462	YES	0.529348
SSPA0638_YP_002141481.1_+_760943-762379	0.0844168	YES	0.588568
SSPA0642_YP_002141485.1_+_764775-765683	0.196379	YES	0.679345
SSPA0658_YP_002141501.1_+_783031-783312	0.124881	YES	0.621263
SSPA0666_YP_002141509.1_+_790807-791553	0.042037	YES	0.554204
SSPA0672_YP_002141515.1_+_797584-797919	0.0333193	YES	0.547085
SSPA0673_YP_002141516.1_+_798041-798457	0.00852792	YES	0.526684
SSPA0674_YP_002141517.1_-_798416-798607	0.331978	YES	0.788261
SSPA0688_YP_002141531.1_+_807586-808314	0.00784112	YES	0.526115
SSPA0707_YP_002141549.1_+_837641-839800	0.0576661	YES	0.566914
SSPA0710_YP_002141551.1_+_841216-842433	0.0518109	YES	0.56216
SSPA0718_YP_002141559.1_+_848757-850199	0.0814659	YES	0.586183
SSPA0730_YP_002141571.1_+_866350-867663	0.166287	YES	0.654838
SSPA0734_YP_002141575.1_+_870921-871922	0.0387128	YES	0.551493
SSPA0749_YP_002141590.1_-_887875-889179	0.000179724	YES	0.51975
SSPA0767_YP_002141608.1_-_912195-913589	0.103115	YES	0.603672
SSPA0768_YP_002141609.1_-_913586-914596	0.0318745	YES	0.545903
SSPA0769_YP_002141610.1_-_914606-914881	0.0188827	YES	0.535237
SSPA0771_YP_002141612.1_-_915373-916005	0.134295	YES	0.628881
SSPA0776_YP_002141616.1_-_918993-919514	0.274859	YES	0.74314
SSPA0777_YP_002141617.1_-_919529-920203	0.0413235	YES	0.553623
SSPA0802_YP_002141643.1_+_943589-943759	0.185305	YES	0.670318
SSPA0803_YP_002141645.1_-_945677-945835	0.328809	YES	0.785814
SSPA0814_YP_002141656.1_+_953530-953742	0.00206965	YES	0.521323
SSPA0831_YP_002141672.1_-_967623-968000	0.00255621	YES	0.521727
SSPA0839_YP_002141680.1_-_973746-974741	0.136051	YES	0.630303
SSPA0841_YP_002141682.1_+_976642-976956	0.00488914	YES	0.523666
SSPA0847_YP_002141688.1_-_981347-981715	0.00782519	YES	0.526102
SSPA0849_YP_002141690.1_-_982137-983540	0.4791	YES	0.888907
SSPA0850_YP_002141691.1_+_983797-985284	0.526064	YES	0.913952
SSPA0856_YP_002141697.1_+_990866-991618	0.0283602	YES	0.543025
SSPA0858_YP_002141699.1_-_992640-992864	0.177243	YES	0.663752
SSPA0859_YP_002141700.1_-_992861-993016	0.00366838	YES	0.522652
SSPA0909_YP_002141750.1_+_1041050-1042060	0.00618346	YES	0.52474
SSPA0915_YP_002141756.1_-_1047195-1048637	0.139788	YES	0.633331
SSPA0916_YP_002141757.1_-_1048761-1049630	0.0132535	YES	0.530594
SSPA0922_YP_002141763.1_+_1056386-1057045	0.0287249	YES	0.543323
SSPA0926_YP_002141767.1_-_1060833-1061063	0.00358065	YES	0.522579
SSPA0927_YP_002141768.1_+_1061201-1061575	0.093317	YES	0.595758
SSPA0930_YP_002141771.1_+_1062882-1062998	0.461879	YES	0.878759
SSPA0931_YP_002141772.1_+_1064446-1065432	0.278847	YES	0.746346
SSPA0933_YP_002141774.1_-_1067720-1068469	0.290287	YES	0.755506
SSPA0939_YP_002141779.1_-_1074451-1074642	0.24082	YES	0.715576
SSPA0944_YP_002141784.1_-_1079793-1079933	0.2296	YES	0.706439
SSPA0948_YP_002141788.1_-_1082326-1082733	0.125886	YES	0.622076
SSPA0949_YP_002141789.1_+_1083416-1084138	0.349876	YES	0.801921
SSPA0965_YP_002141806.1_+_1100237-1100380	0.258384	YES	0.729836
SSPA0989_YP_002141830.1_-_1123359-1124066	0.00209532	YES	0.521344
SSPA1041_YP_002141882.1_-_1183764-1184606	0.017319	YES	0.533949
SSPA1050_YP_002141891.1_+_1194829-1196577	0.180185	YES	0.666147
SSPA1053_YP_002141894.1_+_1198554-1199561	0.0202558	YES	0.536368
SSPA1067_YP_002141908.1_-_1209851-1210354	0.0476968	YES	0.558814
SSPA1068_YP_002141909.1_-_1210444-1210626	0.292303	YES	0.757114
SSPA1082_YP_002141922.1_+_1226803-1227777	0.0699684	YES	0.576884
SSPA1101_YP_002141941.1_-_1250739-1251623	0.17411	YES	0.661201
SSPA1109_YP_002141948.1_+_1258200-1258868	0.0474187	YES	0.558588
SSPA1117_YP_002141956.1_-_1264525-1265031	0.0859127	YES	0.589777
SSPA1126_YP_002141965.1_-_1275359-1276210	0.041654	YES	0.553892
SSPA1127_YP_002141966.1_+_1276508-1277353	0.109305	YES	0.608673
SSPA1128_YP_002141967.1_+_1279438-1280265	0.0237517	YES	0.539242
SSPA1140_YP_002141979.1_+_1290961-1292334	0.0964114	YES	0.598258
SSPA1141_YP_002141980.1_-_1292378-1293313	0.114622	YES	0.612969
SSPA1142_YP_002141981.1_+_1294001-1295833	0.129124	YES	0.624695
SSPA1144_YP_002141983.1_-_1296499-1296933	0.0149321	YES	0.53198
SSPA1157_YP_002141996.1_+_1315178-1315744	0.142628	YES	0.635632
SSPA1158_YP_002141997.1_+_1315756-1316958	0.151058	YES	0.642468
SSPA1188_YP_002142027.1_+_1347318-1347983	0.052429	YES	0.562662
SSPA1190_YP_002142028.1_-_1348039-1350159	0.249876	YES	0.722936
SSPA1211_YP_002142050.1_-_1379772-1379915	0.101118	YES	0.602059
SSPA1247_YP_002142086.1_-_1417740-1417922	0.325158	YES	0.782985
SSPA1250_YP_002142089.1_+_1421323-1422009	0.0388799	YES	0.551629
SSPA1257_YP_002142096.1_+_1428348-1428689	0.106064	YES	0.606054
SSPA1260_YP_002142099.1_+_1430140-1430448	0.141083	YES	0.634379
SSPA1268_YP_002142107.1_+_1437790-1438938	0.06248	YES	0.570818
SSPA1271_YP_002142110.1_-_1442484-1443383	0.00450584	YES	0.523348
SSPA1272_YP_002142111.1_+_1443503-1444756	0.0797086	YES	0.584763
SSPA1275_YP_002142114.1_-_1447320-1447490	0.144642	YES	0.637264
SSPA1287_YP_002142126.1_-_1462072-1463475	0.026023	YES	0.541107
SSPA1300_YP_002142139.1_+_1478286-1478921	0.0170906	YES	0.53376
SSPA1308_YP_002142147.1_+_1486643-1487110	0.0193395	YES	0.535613
SSPA1321_YP_002142160.1_+_1496504-1497358	0.49572	YES	0.898217
SSPA1323_YP_002142162.1_+_1498534-1499559	0.0290288	YES	0.543573
SSPA1339_YP_002142178.1_-_1514234-1515226	0.110729	YES	0.609823
SSPA1340_YP_002142179.1_-_1515216-1515890	0.071332	YES	0.577987
SSPA1343_YP_002142182.1_-_1517199-1517447	0.191664	YES	0.675501
SSPA1345_YP_002142184.1_-_1517727-1517942	0.214676	YES	0.69427
SSPA1346_YP_002142185.1_-_1518036-1518725	0.0981977	YES	0.599701
SSPA1347_YP_002142186.1_-_1518722-1519504	0.113998	YES	0.612465
SSPA1350_YP_002142189.1_-_1520425-1521012	0.200682	YES	0.682855
SSPA1351_YP_002142190.1_-_1521028-1522482	0.429124	YES	0.858116
SSPA1353_YP_002142192.1_-_1522955-1523545	0.0945407	YES	0.596747
SSPA1354_YP_002142193.1_-_1523552-1523878	0.359613	YES	0.809226
SSPA1359_YP_002142198.1_+_1527880-1530642	0.0715946	YES	0.5782
SSPA1372_YP_002142211.1_+_1547862-1548098	0.124515	YES	0.620967
SSPA1373_YP_002142212.1_+_1548180-1548419	0.26164	YES	0.732472
SSPA1374_YP_002142213.1_+_1548497-1548736	0.222313	YES	0.700499
SSPA1377_YP_002142216.1_-_1552849-1553595	0.0243196	YES	0.539709
SSPA1386_YP_002142225.1_-_1563880-1566258	0.02106	YES	0.537029
SSPA1389_YP_002142228.1_+_1568779-1568970	0.132833	YES	0.627698
SSPA1398_YP_002142237.1_-_1577360-1578343	0.045267	YES	0.556836
SSPA1405_YP_002142244.1_-_1584636-1585490	0.123718	YES	0.620323
SSPA1407_YP_002142246.1_+_1585971-1586903	0.041943	YES	0.554128
SSPA1417_YP_002142256.1_+_1594656-1596908	0.446202	YES	0.869092
SSPA1427_YP_002142266.1_-_1604979-1605464	0.151447	YES	0.642784
SSPA1450_YP_002142289.1_+_1632308-1633594	0.153838	YES	0.644724
SSPA1467_YP_002142306.1_+_1644508-1644756	0.204027	YES	0.685583
SSPA1483_YP_002142322.1_-_1659026-1659496	0.0108826	YES	0.528634
SSPA1486_YP_002142325.1_+_1660388-1660651	0.2099	YES	0.690375
SSPA1488_YP_002142327.1_+_1661397-1661918	0.166071	YES	0.654662
SSPA1490_YP_002142329.1_+_1663212-1664021	0.000711839	YES	0.520193
SSPA1522_YP_002142361.1_-_1697690-1697947	0.0518986	YES	0.562231
SSPA1528_YP_002142367.1_-_1702778-1703602	0.0926452	YES	0.595216
SSPA1529_YP_002142368.1_-_1703583-1704221	0.0496178	YES	0.560377
SSPA1543_YP_002142382.1_-_1718142-1719191	0.039631	YES	0.552242
SSPA1547a_YP_002142387.1_-_1722115-1722363	0.17153	YES	0.659102
SSPA1549_YP_002142389.1_-_1725961-1726914	0.211828	YES	0.691947
SSPA1550_YP_002142390.1_-_1726929-1728590	0.168821	YES	0.656898
SSPA1554_YP_002142394.1_-_1731467-1732249	0.338931	YES	0.793602
SSPA1555_YP_002142395.1_-_1732263-1733018	0.0622257	YES	0.570612
SSPA1556_YP_002142396.1_-_1733039-1734250	0.0595981	YES	0.568482
SSPA1557_YP_002142397.1_-_1734277-1734975	0.358192	YES	0.808166
SSPA1558_YP_002142398.1_-_1734987-1735391	0.00476727	YES	0.523565
SSPA1559_YP_002142399.1_-_1735395-1735811	0.0566508	YES	0.56609
SSPA1561_YP_002142401.1_+_1736719-1737012	0.45015	YES	0.871565
SSPA1565_YP_002142405.1_-_1740285-1740932	0.0339013	YES	0.547562
SSPA1575_YP_002142415.1_+_1748623-1749198	0.0285669	YES	0.543194
SSPA1586_YP_002142426.1_-_1761134-1761454	0.047269	YES	0.558466
SSPA1587_YP_002142427.1_-_1761586-1761912	0.353989	YES	0.805018
SSPA1588_YP_002142428.1_-_1761974-1762429	0.108883	YES	0.608332
SSPA1592_YP_002142432.1_+_1765288-1766034	0.106253	YES	0.606207
SSPA1608_YP_002142448.1_-_1787135-1787302	0.48491	YES	0.892216
SSPA1614_YP_002142454.1_-_1792990-1793352	0.0452024	YES	0.556783
SSPA1622_YP_002142462.1_-_1800346-1801149	0.0726039	YES	0.579017
SSPA1625_YP_002142465.1_-_1802535-1804001	0.020488	YES	0.536559
SSPA1632_YP_002142472.1_+_1812978-1813088	0.153805	YES	0.644698
SSPA1634_YP_002142474.1_+_1813592-1815277	0.14154	YES	0.63475
SSPA1636_YP_002142476.1_-_1815645-1815965	0.136344	YES	0.630541
SSPA1642_YP_002142482.1_-_1819982-1820761	0.151513	YES	0.642838
SSPA1646_YP_002142486.1_+_1823767-1824429	0.00934173	YES	0.527358
SSPA1676_YP_002142516.1_-_1860806-1862653	0.0911907	YES	0.594041
SSPA1680_YP_002142520.1_-_1869464-1870267	0.0592019	YES	0.56816
SSPA1690_YP_002142530.1_-_1881996-1882679	0.0138039	YES	0.531048
SSPA1708_YP_002142546.1_-_1904139-1905482	0.0866486	YES	0.590371
SSPA1711_YP_002142549.1_-_1910481-1910975	0.0406166	YES	0.553046
SSPA1720_YP_002142558.1_+_1919362-1920039	0.148348	YES	0.64027
SSPA1721_YP_002142559.1_+_1920393-1920605	0.0578992	YES	0.567103
SSPA1795_YP_002142633.1_+_2001432-2003654	0.318911	YES	0.778121
SSPA1798_YP_002142636.1_+_2005206-2005346	0.272546	YES	0.741277
SSPA1799_YP_002142637.1_+_2005333-2005593	0.154653	YES	0.645386
SSPA1820_YP_002142657.1_+_2025042-2025950	0.0539709	YES	0.563914
SSPA1821_YP_002142658.1_-_2028318-2028491	0.173488	YES	0.660695
SSPA1833_YP_002142670.1_+_2043651-2044934	0.250807	YES	0.723692
SSPA1841_YP_002142678.1_+_2050880-2052355	0.0193371	YES	0.535611
SSPA1851_YP_002142688.1_+_2062362-2062748	0.372084	YES	0.818438
SSPA1855_YP_002142692.1_-_2067090-2067878	0.252882	YES	0.725376
SSPA1868_YP_002142705.1_-_2079958-2081166	0.0203601	YES	0.536453
SSPA1874_YP_002142711.1_-_2088146-2088391	0.188291	YES	0.672752
SSPA1879_YP_002142716.1_-_2092058-2094007	0.0266988	YES	0.541662
SSPA1882_YP_002142719.1_-_2096909-2097619	0.136397	YES	0.630583
SSPA1898_YP_002142736.1_+_2115445-2116032	0.000539511	YES	0.520049
SSPA1905_YP_002142743.1_-_2125994-2126536	0.0993544	YES	0.600635
SSPA1914_YP_002142752.1_-_2134405-2134737	0.0280318	YES	0.542755
SSPA1920_YP_002142758.1_+_2143030-2144250	0.0832938	YES	0.587661
SSPA1949_YP_002142788.1_+_2178023-2179234	0.0930821	YES	0.595569
SSPA1969_YP_002142808.1_+_2197922-2198332	0.123933	YES	0.620496
SSPA1977_YP_002142816.1_+_2207668-2208414	0.0310443	YES	0.545224
SSPA1978_YP_002142817.1_+_2208731-2209633	0.155856	YES	0.646363
SSPA1999_YP_002142838.1_+_2233863-2236118	0.250089	YES	0.723109
SSPA2003_YP_002142842.1_+_2238950-2239531	0.0208527	YES	0.536859
SSPA2011_YP_002142850.1_-_2248033-2248269	0.148961	YES	0.640767
SSPA2013_YP_002142852.1_+_2250051-2250821	0.0665363	YES	0.574105
SSPA2015_YP_002142853.1_+_2251382-2251627	0.110259	YES	0.609443
SSPA2020_YP_002142857.1_+_2257209-2257517	0.0651807	YES	0.573007
SSPA2026_YP_002142863.1_-_2263733-2264425	0.141219	YES	0.63449
SSPA2049_YP_002142886.1_-_2289181-2290962	0.0360829	YES	0.549345
SSPA2050_YP_002142887.1_-_2291047-2291865	0.186732	YES	0.67148
SSPA2062_YP_002142899.1_+_2303560-2304414	0.0169284	YES	0.533627
SSPA2078_YP_002142915.1_-_2322855-2324753	0.0406039	YES	0.553036
SSPA2090_YP_002142927.1_+_2336247-2339396	0.0200144	YES	0.536169
SSPA2097_YP_002142934.1_+_2342515-2344065	0.0240619	YES	0.539497
SSPA2099_YP_002142936.1_-_2344718-2345287	0.132552	YES	0.62747
SSPA2106_YP_002142943.1_+_2352489-2353544	0.027512	YES	0.542329
SSPA2113_YP_002142950.1_-_2360267-2360539	0.0627275	YES	0.571019
SSPA2128_YP_002142965.1_+_2378505-2378639	0.0992789	YES	0.600574
SSPA2141_YP_002142978.1_+_2390928-2391170	0.0516628	YES	0.562039
SSPA2153_YP_002142990.1_+_2401104-2401430	0.0666743	YES	0.574217
SSPA2174_YP_002143011.1_+_2424857-2425651	0.120205	YES	0.617481
SSPA2188_YP_002143025.1_-_2435888-2436982	0.0543803	YES	0.564247
SSPA2210_YP_002143047.1_-_2467942-2468301	0.14001	YES	0.63351
SSPA2211_YP_002143048.1_-_2468359-2468583	0.0721896	YES	0.578681
SSPA2213a_YP_002143051.1_-_2470304-2470792	0.0384567	YES	0.551284
SSPA2219_YP_002143057.1_+_2475953-2476714	0.0389713	YES	0.551704
SSPA2221_YP_002143059.1_+_2479264-2480589	0.0158525	YES	0.532739
SSPA2222_YP_002143060.1_+_2480555-2481313	0.0413535	YES	0.553647
SSPA2229_YP_002143067.1_-_2487953-2489884	0.0936953	YES	0.596064
SSPA2231_YP_002143069.1_-_2491264-2491953	0.0565891	YES	0.56604
SSPA2232e_YP_002143075.1_-_2495516-2496808	0.0508845	YES	0.561407
SSPA2236_YP_002143083.1_-_2504053-2504490	0.0629037	YES	0.571162
SSPA2251_YP_002143098.1_-_2511514-2511660	0.11639	YES	0.614398
SSPA2253_YP_002143100.1_+_2512413-2513102	0.302228	YES	0.764999
SSPA2281_YP_002143127.1_+_2534460-2535200	0.0665055	YES	0.57408
SSPA2290_YP_002143136.1_-_2543788-2544243	0.008515	YES	0.526673
SSPA2293_YP_002143139.1_-_2548274-2548849	0.149383	YES	0.641109
SSPA2298_YP_002143144.1_-_2551748-2552692	0.0741707	YES	0.580284
SSPA2301_YP_002143147.1_-_2557767-2558507	0.114072	YES	0.612524
SSPA2302_YP_002143148.1_-_2559208-2559702	0.00337776	YES	0.52241
SSPA2307_YP_002143152.1_-_2569899-2572145	0.0696524	YES	0.576628
SSPA2311_YP_002143156.1_-_2573914-2574384	0.0529718	YES	0.563103
SSPA2317_YP_002143162.1_-_2581530-2582834	0.109171	YES	0.608564
SSPA2320_YP_002143165.1_-_2584782-2585267	0.104714	YES	0.604964
SSPA2326_YP_002143171.1_-_2588206-2589714	0.0187933	YES	0.535164
SSPA2332_YP_002143177.1_+_2595459-2595953	0.111572	YES	0.610504
SSPA2340_YP_002143185.1_+_2603272-2604639	0.0380239	YES	0.55093
SSPA2341_YP_002143186.1_-_2604695-2605465	0.0920835	YES	0.594762
SSPA2342_YP_002143187.1_-_2605543-2606322	0.0270564	YES	0.541955
SSPA2344_YP_002143189.1_+_2607755-2608669	0.0659863	YES	0.573659
SSPA2346_YP_002143191.1_-_2615497-2618070	0.0418791	YES	0.554076
SSPA2350_YP_002143195.1_+_2621049-2621387	0.198298	YES	0.68091
SSPA2365_YP_002143210.1_-_2634921-2635511	0.0989935	YES	0.600343
SSPA2374_YP_002143219.1_+_2652457-2653866	0.0659939	YES	0.573666
SSPA2378_YP_002143223.1_-_2658208-2658426	0.0788691	YES	0.584084
SSPA2381_YP_002143226.1_-_2660076-2662856	0.0908388	YES	0.593757
SSPA2387_YP_002143232.1_+_2665572-2666294	0.302154	YES	0.764941
SSPA2403_YP_002143248.1_-_2674915-2675979	0.142819	YES	0.635786
SSPA2406_YP_002143251.1_+_2678738-2679781	0.000626236	YES	0.520121
SSPA2416_YP_002143261.1_-_2687426-2687653	0.0556371	YES	0.565268
SSPA2417_YP_002143262.1_-_2687653-2687886	0.00670359	YES	0.525172
SSPA2421_YP_002143266.1_-_2689009-2689251	0.0324217	YES	0.546351
SSPA2422_YP_002143267.1_+_2689368-2690000	0.103386	YES	0.603891
SSPA2424a_YP_002143270.1_-_2693146-2694264	0.0142531	YES	0.531419
SSPA2449_YP_002143295.1_-_2724589-2726109	0.526064	YES	0.913952
SSPA2455_YP_002143300.1_-_2734950-2737124	0.132199	YES	0.627185
SSPA2463_YP_002143308.1_+_2745837-2745956	0.225445	YES	0.703053
SSPA2473_YP_002143318.1_-_2756514-2756993	0.0870054	YES	0.59066
SSPA2498_YP_002143343.1_-_2781908-2782093	0.0204563	YES	0.536533
SSPA2537_YP_002143382.1_+_2820733-2820942	0.395189	YES	0.835028
SSPA2540_YP_002143385.1_-_2823411-2823863	0.0447867	YES	0.556445
SSPA2545_YP_002143390.1_-_2826157-2826399	0.119344	YES	0.616786
SSPA2546_YP_002143391.1_-_2826424-2827602	0.087327	YES	0.59092
SSPA2547_YP_002143392.1_+_2827918-2828847	0.201999	YES	0.683929
SSPA2550_YP_002143395.1_-_2832153-2833784	0.364067	YES	0.812536
SSPA2554_YP_002143399.1_-_2834761-2836818	0.278776	YES	0.746289
SSPA2555_YP_002143400.1_-_2836837-2837859	0.675126	YES	0.967851
SSPA2556_YP_002143401.1_-_2837929-2839158	0.691482	YES	0.971621
SSPA2557_YP_002143402.1_-_2839186-2840967	0.00770105	YES	0.525999
SSPA2564_YP_002143409.1_-_2845318-2846328	0.0392763	YES	0.551952
SSPA2569_YP_002143414.1_-_2850554-2851672	0.493168	YES	0.896818
SSPA2572_YP_002143417.1_+_2854460-2854903	0.213336	YES	0.693177
SSPA2573_YP_002143418.1_+_2855298-2855516	0.165791	YES	0.654434
SSPA2574_YP_002143419.1_+_2855786-2856067	0.29046	YES	0.755644
SSPA2577_YP_002143422.1_-_2858338-2858664	0.119777	YES	0.617136
SSPA2581_YP_002143426.1_+_2863140-2864051	0.0514709	YES	0.561883
SSPA2588_YP_002143433.1_+_2870317-2871081	0.263507	YES	0.733982
SSPA2593_YP_002143438.1_-_2875043-2876176	0.759874	YES	0.983764
SSPA2595_YP_002143440.1_-_2876972-2877733	0.00944196	YES	0.527441
SSPA2610_YP_002143455.1_+_2894969-2895922	0.144527	YES	0.637171
SSPA2619_YP_002143464.1_+_2908081-2908668	0.0195206	YES	0.535762
SSPA2622_YP_002143467.1_+_2912259-2912759	0.0092895	YES	0.527315
SSPA2625_YP_002143470.1_+_2913836-2914954	0.108966	YES	0.608399
SSPA2697_YP_002143540.1_-_2999926-3000993	0.171448	YES	0.659035
SSPA2698_YP_002143541.1_-_3000990-3001733	0.0177489	YES	0.534303
SSPA2704_YP_002143547.1_-_3008816-3009043	0.106807	YES	0.606655
SSPA2707_YP_002143550.1_-_3010869-3011621	0.122523	YES	0.619356
SSPA2713_YP_002143555.1_-_3016982-3017644	0.0657179	YES	0.573442
SSPA2730_YP_002143572.1_+_3035021-3035350	0.156554	YES	0.646929
SSPA2733_YP_002143575.1_-_3038072-3038731	0.00719146	YES	0.525576
SSPA2739_YP_002143581.1_-_3043984-3045147	0.0515486	YES	0.561946
SSPA2764_YP_002143606.1_+_3067263-3067553	0.0762848	YES	0.581994
SSPA2780_YP_002143622.1_+_3082983-3083279	0.366916	YES	0.814641
SSPA2804_YP_002143646.1_-_3105118-3106173	0.120388	YES	0.61763
SSPA2820_YP_002143662.1_+_3122089-3122499	0.223675	YES	0.70161
SSPA2851_YP_002143693.1_+_3154821-3156296	0.0183918	YES	0.534833
SSPA2866_YP_002143708.1_-_3173134-3174435	0.0269875	YES	0.541899
SSPA2872_YP_002143714.1_+_3178752-3179042	0.00244012	YES	0.521631
SSPA2892_YP_002143734.1_+_3202516-3202884	0.136554	YES	0.630711
SSPA2901_YP_002143744.1_-_3211117-3212481	0.203599	YES	0.685234
SSPA2927_YP_002143768.1_+_3241531-3242121	0.0682239	YES	0.575472
SSPA2938_YP_002143779.1_-_3250615-3252504	0.0213608	YES	0.537277
SSPA2948_YP_002143789.1_-_3264994-3265326	0.0351707	YES	0.548599
SSPA2955_YP_002143796.1_+_3271796-3273229	0.0295539	YES	0.544003
SSPA2975_YP_002143816.1_+_3287552-3288985	0.144945	YES	0.63751
SSPA3002_YP_002143843.1_+_3317650-3319017	0.106119	YES	0.606099
SSPA3011_YP_002143852.1_-_3328121-3328750	0.0628272	YES	0.5711
SSPA3013_YP_002143854.1_+_3330222-3330692	0.157516	YES	0.64771
SSPA3014_YP_002143855.1_+_3331057-3331320	0.00639028	YES	0.524912
SSPA3015_YP_002143856.1_+_3331424-3331690	0.00316177	YES	0.522231
SSPA3022_YP_002143863.1_-_3338134-3341847	0.0401242	YES	0.552644
SSPA3027_YP_002143868.1_-_3345714-3346757	0.0234277	YES	0.538976
SSPA3032_YP_002143873.1_+_3352293-3352763	0.0486673	YES	0.559604
SSPA3043_YP_002143884.1_+_3364469-3367582	0.00456168	YES	0.523394
SSPA3066_YP_002143907.1_-_3389429-3389863	0.037126	YES	0.550197
SSPA3074_YP_002143915.1_-_3392777-3393091	0.178825	YES	0.665039
SSPA3077_YP_002143918.1_-_3393891-3394082	0.0597344	YES	0.568592
SSPA3080_YP_002143921.1_-_3395224-3395556	0.0354929	YES	0.548863
SSPA3084_YP_002143925.1_-_3397004-3397609	0.0149038	YES	0.531956
SSPA3091_YP_002143932.1_-_3401621-3403735	0.0631355	YES	0.57135
SSPA3099_YP_002143940.1_+_3407987-3408190	0.265302	YES	0.735433
SSPA3109_YP_002143950.1_-_3416999-3417403	0.0147274	YES	0.531811
SSPA3116_YP_002143957.1_-_3423288-3423860	0.0892037	YES	0.592436
SSPA3121a_YP_002143963.1_+_3431163-3437129	0.135495	YES	0.629853
SSPA3146_YP_002143988.1_+_3465526-3467844	0.0213177	YES	0.537241
SSPA3154_YP_002143996.1_-_3475315-3477708	0.0823042	YES	0.586861
SSPA3155_YP_002143997.1_+_3478302-3481007	0.117897	YES	0.615616
SSPA3156_YP_002143998.1_-_3481081-3481839	0.146062	YES	0.638415
SSPA3172_YP_002144014.1_+_3503165-3504379	0.0749184	YES	0.580889
SSPA3177_YP_002144019.1_+_3509125-3509541	0.166192	YES	0.65476
SSPA3193_YP_002144036.1_-_3525251-3526726	0.0728841	YES	0.579243
SSPA3213_YP_002144054.1_+_3546540-3546920	0.0993499	YES	0.600631
SSPA3232_YP_002144071.1_-_3566335-3567924	0.0610159	YES	0.569631
SSPA3235_YP_002144074.1_+_3570773-3571801	0.0179415	YES	0.534462
SSPA3242_YP_002144081.1_-_3582992-3586423	0.0793602	YES	0.584481
SSPA3244_YP_002144083.1_-_3587629-3589929	0.0707098	YES	0.577484
SSPA3247_YP_002144086.1_+_3593762-3595333	0.0513105	YES	0.561753
SSPA3259_YP_002144098.1_+_3608539-3609546	0.0132184	YES	0.530565
SSPA3264_YP_002144104.1_+_3616143-3616760	0.00625172	YES	0.524797
SSPA3268_YP_002144108.1_+_3620120-3620659	0.161593	YES	0.651023
SSPA3275_YP_002144115.1_-_3626527-3626829	0.0310754	YES	0.545249
SSPA3285_YP_002144124.1_-_3638192-3638992	0.0614945	YES	0.57002
SSPA3290_YP_002144129.1_+_3643556-3644542	0.165585	YES	0.654267
SSPA3297_YP_002144136.1_-_3651694-3653232	0.170912	YES	0.6586
SSPA3316_YP_002144155.1_-_3679659-3680126	0.103213	YES	0.603752
SSPA3320_YP_002144159.1_+_3682740-3684023	0.00548707	YES	0.524162
SSPA3331_YP_002144170.1_-_3695387-3696085	0.0186899	YES	0.535078
SSPA3332_YP_002144171.1_-_3696108-3697118	0.148528	YES	0.640415
SSPA3338_YP_002144177.1_-_3702195-3703229	0.0156603	YES	0.532581
SSPA3351_YP_002144190.1_-_3712763-3713620	0.0142793	YES	0.531441
SSPA3352_YP_002144191.1_+_3713739-3714623	0.00423779	YES	0.523125
SSPA3373_YP_002144210.1_+_3743568-3744248	0.0646359	YES	0.572566
SSPA3389_YP_002144226.1_+_3762948-3763271	0.152829	YES	0.643905
SSPA3391_YP_002144228.1_-_3763641-3764501	0.0765678	YES	0.582223
SSPA3394_YP_002144231.1_-_3767475-3767762	0.135149	YES	0.629573
SSPA3432_YP_002144269.1_+_3810194-3812929	0.138017	YES	0.631896
SSPA3437_YP_002144276.1_-_3821254-3822654	0.123026	YES	0.619763
SSPA3441_YP_002144280.1_+_3824055-3825701	0.193128	YES	0.676694
SSPA3444_YP_002144283.1_+_3828603-3829505	0.00824489	YES	0.52645
SSPA3450_YP_002144289.1_-_3834053-3834826	0.0682892	YES	0.575524
SSPA3454_YP_002144293.1_+_3838273-3839583	0.0184352	YES	0.534869
SSPA3471_YP_002144310.1_+_3856006-3856998	0.0246025	YES	0.539941
SSPA3478a_YP_002144319.1_+_3867243-3868241	0.144015	YES	0.636756
SSPA3484_YP_002144325.1_-_3878274-3879710	0.126811	YES	0.622824
SSPA3486_YP_002144327.1_+_3881946-3882206	0.114677	YES	0.613014
SSPA3489_YP_002144330.1_+_3885163-3886707	0.0912851	YES	0.594117
SSPA3499_YP_002144340.1_-_3895058-3896539	0.177847	YES	0.664243
SSPA3516_YP_002144358.1_-_3917009-3918178	0.124848	YES	0.621237
SSPA3525_YP_002144367.1_+_3925911-3926114	0.283087	YES	0.749748
SSPA3543_YP_002144385.1_-_3942453-3943406	0.062666	YES	0.570969
SSPA3574_YP_002144416.1_+_3984228-3984731	0.161698	YES	0.651108
SSPA3577_YP_002144419.1_-_3988024-3989073	0.00463091	YES	0.523452
SSPA3609_YP_002144450.1_-_4022828-4023859	0.242052	YES	0.716578
SSPA3610_YP_002144451.1_+_4024041-4025141	0.414908	YES	0.848642
SSPA3631_YP_002144472.1_+_4044315-4044815	0.130306	YES	0.625652
SSPA3645_YP_002144483.1_+_4057231-4058766	0.0355647	YES	0.548921
SSPA3653_YP_002144491.1_-_4064875-4065471	0.116666	YES	0.614621
SSPA3658_YP_002144496.1_+_4070847-4071086	0.250163	YES	0.723169
SSPA3663_YP_002144501.1_-_4074845-4075816	0.0196833	YES	0.535896
SSPA3664_YP_002144502.1_-_4075910-4076935	0.0017697	YES	0.521073
SSPA3668_YP_002144506.1_-_4080612-4082402	0.0448761	YES	0.556518
SSPA3669_YP_002144507.1_-_4082858-4083175	0.00194478	YES	0.521219
SSPA3671_YP_002144509.1_+_4084603-4087035	0.0614322	YES	0.569969
SSPA3677_YP_002144515.1_+_4096372-4097262	0.253151	YES	0.725594
SSPA3683_YP_002144521.1_-_4104689-4107340	0.162026	YES	0.651374
SSPA3702_YP_002144540.1_+_4132421-4132849	0.0737053	YES	0.579908
SSPA3709_YP_002144547.1_-_4143918-4144355	0.0261384	YES	0.541202
SSPA3722_YP_002144560.1_+_4154702-4154974	0.204038	YES	0.685592
SSPA3724_YP_002144562.1_-_4155720-4156175	0.0107589	YES	0.528531
SSPA3738_YP_002144576.1_+_4182527-4182628	0.284853	YES	0.751162
SSPA3739_YP_002144577.1_+_4182663-4183202	0.0854981	YES	0.589442
SSPA3741_YP_002144579.1_-_4184115-4184387	0.0357134	YES	0.549043
SSPA3748_YP_002144586.1_+_4192710-4192955	0.603229	YES	0.946536
SSPA3758_YP_002144596.1_+_4204059-4204976	0.323111	YES	0.781394
SSPA3771_YP_002144609.1_-_4216002-4216985	0.0507942	YES	0.561333
SSPA3774_YP_002144612.1_+_4219762-4220955	0.105108	YES	0.605282
SSPA3782_YP_002144620.1_+_4228464-4229096	0.01673	YES	0.533463
SSPA3784_YP_002144622.1_+_4230471-4231790	0.255797	YES	0.72774
SSPA3786_YP_002144624.1_+_4233081-4246763	0.356279	YES	0.806736
SSPA3787_YP_002144625.1_+_4246803-4248869	0.0757729	YES	0.58158
SSPA3790_YP_002144628.1_-_4251581-4251904	0.00406504	YES	0.522982
SSPA3800_YP_002144638.1_+_4263466-4263612	0.0408358	YES	0.553225
SSPA3820_YP_002144657.1_-_4285258-4286019	0.0857636	YES	0.589656
SSPA3827_YP_002144664.1_-_4296214-4296480	0.394546	YES	0.834575
SSPA3834_YP_002144671.1_-_4306966-4307280	0.220254	YES	0.69882
SSPA3835_YP_002144672.1_-_4307337-4307534	0.446768	YES	0.869448
SSPA3837_YP_002144674.1_-_4307841-4308716	0.20549	YES	0.686776
SSPA3851_YP_002144688.1_+_4320537-4322183	0.0928173	YES	0.595355
SSPA3857_YP_002144694.1_+_4325906-4326052	0.0578766	YES	0.567085
SSPA3878_YP_002144715.1_+_4349861-4350169	0.0858252	YES	0.589706
SSPA3883_YP_002144720.1_+_4355886-4356311	0.0194097	YES	0.535671
SSPA3895_YP_002144729.1_-_4365539-4365859	0.0798263	YES	0.584858
SSPA3898_YP_002144732.1_-_4367204-4367959	0.0298817	YES	0.544271
SSPA3907_YP_002144741.1_+_4374495-4374701	0.0258645	YES	0.540977
SSPA3913_YP_002144747.1_-_4377335-4377970	0.0832593	YES	0.587633
SSPA3919_YP_002144753.1_-_4385267-4386115	0.0308759	YES	0.545086
SSPA3920_YP_002144754.1_+_4386203-4386589	0.0883886	YES	0.591777
SSPA3928_YP_002144762.1_+_4393860-4395593	0.218074	YES	0.697042
SSPA3937_YP_002144771.1_+_4408485-4408871	0.0118978	YES	0.529473
SSPA3946_YP_002144780.1_+_4414605-4416578	0.0365743	YES	0.549746
SSPA3947_YP_002144781.1_+_4416656-4416898	0.163073	YES	0.652225
SSPA3951_YP_002144785.1_+_4420200-4420370	0.209313	YES	0.689896
SSPA3954_YP_002144788.1_-_4423662-4424609	0.13001	YES	0.625413
SSPA3958_YP_002144792.1_-_4429275-4430210	0.0901781	YES	0.593223
SSPA3969_YP_002144803.1_-_4439470-4439616	0.478438	YES	0.888526
SSPA3970_YP_002144804.1_-_4439695-4440183	0.00423288	YES	0.523121
SSPA3978_YP_002144812.1_-_4449993-4450991	0.0429744	YES	0.554968
SSPA3986_YP_002144820.1_+_4458885-4459121	0.268761	YES	0.738226
SSPA3999_YP_002144833.1_-_4472229-4472873	0.192561	YES	0.676232
SSPA4017_YP_002144851.1_+_4497571-4498344	0.0765453	YES	0.582205
SSPA4018_YP_002144852.1_-_4498345-4499358	0.0483535	YES	0.559348
SSPA4031_YP_002144865.1_-_4512890-4513033	0.0202702	YES	0.536379
SSPA4034_YP_002144868.1_-_4514574-4515962	0.00150671	YES	0.520854
SSPA4039_YP_002144873.1_+_4522851-4523153	0.0153409	YES	0.532317
SSPA4045_YP_002144879.1_-_4531410-4531871	0.214987	YES	0.694524
SSPA4052_YP_002144886.1_-_4536665-4537123	0.0405213	YES	0.552968
SSPA4061_YP_002144895.1_+_4545016-4545633	0.0604208	YES	0.569149
SSPA4086_YP_002144920.1_-_4572181-4573266	0.0371914	YES	0.55025
SSPA4088_YP_002144922.1_-_4573882-4576419	0.0958341	YES	0.597792
SSPA4089_YP_002144923.1_-_4576465-4577148	0.0469068	YES	0.558171
SSPA4090_YP_002144924.1_-_4577219-4577764	0.0660849	YES	0.573739

## Sheet: ATCC9150
Protein	Score	T3S protein or Not	Probability
SPA0001_YP_149352.1_+_190-255	0.445866	YES	0.868881
SPA0002_YP_149353.1_+_337-2799	0.0590027	YES	0.567999
SPA0004_YP_149355.1_+_3734-5020	0.0382215	YES	0.551092
SPA0011_YP_149361.1_-_10840-11244	0.18762	YES	0.672205
SPA0017_YP_149367.1_-_17036-17479	0.169352	YES	0.65733
SPA0019_YP_149368.1_+_19991-23047	0.069956	YES	0.576874
SPA0022_YP_149371.1_+_25105-25791	0.20988	YES	0.690358
SPA0025_YP_149374.1_+_29426-29971	0.0582534	YES	0.567391
SPA0028_YP_149376.1_+_31267-32112	0.0092188	YES	0.527256
SPA0032_YP_149380.1_-_34369-34806	0.141464	YES	0.634688
SPA0033_YP_149381.1_+_35329-37047	0.0930077	YES	0.595509
SPA0039_YP_149386.1_+_44278-45993	0.0180769	YES	0.534573
SPA0044_YP_149391.1_-_52246-52509	0.184337	YES	0.669529
SPA0083_YP_149429.1_-_94519-94809	0.0615826	YES	0.570091
SPA0094_YP_149439.1_-_105706-108060	0.0118464	YES	0.529431
SPA0113_YP_149458.1_-_131177-132577	0.0312346	YES	0.545379
SPA0115_YP_149460.1_-_133671-135242	0.0134281	YES	0.530738
SPA0131_YP_149476.1_+_152647-154122	0.0013	YES	0.520682
SPA0136_YP_149481.1_+_158439-159356	0.0645052	YES	0.57246
SPA0137_YP_149482.1_+_159704-160132	0.150365	YES	0.641906
SPA0147_YP_149492.1_-_169549-170934	0.0966567	YES	0.598456
SPA0157_YP_149502.1_+_182148-184037	0.216078	YES	0.695414
SPA0161_YP_149506.1_-_187078-188706	0.159856	YES	0.649611
SPA0165_YP_149510.1_+_193427-194698	0.150031	YES	0.641635
SPA0167_YP_149512.1_+_195681-196448	0.0130269	YES	0.530406
SPA0168_YP_149513.1_-_196478-197272	0.0214539	YES	0.537353
SPA0182_YP_149527.1_-_210264-210836	0.0741417	YES	0.580261
SPA0183_YP_149528.1_-_210871-213468	0.096774	YES	0.598551
SPA0189_YP_149534.1_-_217624-218103	0.0186876	YES	0.535076
SPA0201_YP_149545.1_+_234923-235483	0.0557482	YES	0.565358
SPA0208_YP_149550.1_-_241483-242763	0.00102043	YES	0.52045
SPA0214_YP_149556.1_+_247117-248634	0.00993036	YES	0.527845
SPA0215_YP_149557.1_+_248764-250191	0.107229	YES	0.606996
SPA0226_YP_149567.1_+_261296-261853	0.0982669	YES	0.599757
SPA0232_YP_149573.1_+_269062-269547	0.161178	YES	0.650685
SPA0240_YP_149581.1_+_278327-280090	0.052416	YES	0.562651
SPA0251_YP_149592.1_-_289140-289544	0.246097	YES	0.719867
SPA0254_YP_149595.1_-_291163-292194	0.181888	YES	0.667534
SPA0270_YP_149604.1_+_306709-307746	0.0866787	YES	0.590396
SPA0275_YP_149609.1_-_310922-312256	0.0390219	YES	0.551745
SPA0282_YP_149616.1_+_318096-319895	0.0565149	YES	0.56598
SPA0300_YP_149633.1_+_334524-338411	0.0611672	YES	0.569754
SPA0310_YP_149641.1_-_350215-351405	0.0247362	YES	0.540051
SPA0335_YP_149665.1_+_373793-378727	0.0282582	YES	0.542941
SPA0343_YP_149672.1_+_388086-389090	0.166874	YES	0.655315
SPA0355_YP_149681.1_-_418782-420131	0.0218568	YES	0.537685
SPA0358_YP_149684.1_+_423493-423651	0.0387099	YES	0.55149
SPA0360_YP_149685.1_-_424644-425183	0.0453814	YES	0.556929
SPA0361_YP_149686.1_-_425199-425714	0.0187276	YES	0.535109
SPA0381_YP_149705.1_+_446739-447773	0.0239434	YES	0.5394
SPA0388_YP_149712.1_-_454005-457118	0.040679	YES	0.553097
SPA0394_YP_149717.1_+_464973-465203	0.0946751	YES	0.596855
SPA0397_YP_149720.1_+_468508-470787	0.043569	YES	0.555453
SPA0429_YP_149752.1_-_497669-498961	0.0988356	YES	0.600216
SPA0434_YP_149757.1_-_502635-502892	0.021972	YES	0.53778
SPA0441_YP_149764.1_+_509930-510856	0.0844518	YES	0.588596
SPA0448_YP_149767.1_-_513563-513925	0.264541	YES	0.734818
SPA0473_YP_149787.1_-_544212-545525	0.0367296	YES	0.549873
SPA0478_YP_149792.1_-_550602-551153	0.00487048	YES	0.523651
SPA0493_YP_149807.1_-_563313-564314	0.227124	YES	0.704421
SPA0521_YP_149835.1_+_591303-591575	0.117654	YES	0.615419
SPA0526_YP_149840.1_-_596547-598691	0.15742	YES	0.647632
SPA0532_YP_149846.1_-_604020-604619	0.0383738	YES	0.551216
SPA0535_YP_149849.1_+_607874-608026	0.0356732	YES	0.54901
SPA0576_YP_149890.1_-_649520-650473	0.101234	YES	0.602153
SPA0623_YP_149935.1_-_702232-702459	0.362331	YES	0.811248
SPA0632_YP_149944.1_-_709376-710965	0.107732	YES	0.607402
SPA0671_YP_149981.1_-_753471-754379	0.0117462	YES	0.529348
SPA0679_YP_149989.1_+_760997-762433	0.0844168	YES	0.588568
SPA0683_YP_149993.1_+_764790-765737	0.100087	YES	0.601227
SPA0699_YP_150009.1_+_783085-783366	0.124881	YES	0.621263
SPA0707_YP_150017.1_+_790861-791607	0.042037	YES	0.554204
SPA0713_YP_150023.1_+_797638-797973	0.0333193	YES	0.547085
SPA0714_YP_150024.1_+_798095-798511	0.00852792	YES	0.526684
SPA0715_YP_150025.1_-_798470-798661	0.331978	YES	0.788261
SPA0729_YP_150039.1_+_807631-808368	0.0269378	YES	0.541858
SPA0750_YP_150058.1_+_837695-839854	0.0576661	YES	0.566914
SPA0753_YP_150061.1_+_841271-842488	0.0518109	YES	0.56216
SPA0761_YP_150069.1_+_848812-850254	0.0814659	YES	0.586183
SPA0776_YP_150081.1_+_866405-867718	0.166287	YES	0.654838
SPA0780_YP_150085.1_+_870976-871977	0.0387128	YES	0.551493
SPA0782_YP_150087.1_+_873861-874862	0.0387128	YES	0.551493
SPA0784_YP_150089.1_+_876746-877747	0.0387128	YES	0.551493
SPA0799_YP_150104.1_-_893700-895004	0.000179724	YES	0.51975
SPA0820_YP_150122.1_-_918020-919408	0.103115	YES	0.603672
SPA0821_YP_150123.1_-_919405-920415	0.0318745	YES	0.545903
SPA0822_YP_150124.1_-_920425-920700	0.0188827	YES	0.535237
SPA0824_YP_150126.1_-_921192-921824	0.0997169	YES	0.600928
SPA0829_YP_150131.1_-_924983-925504	0.274859	YES	0.74314
SPA0830_YP_150132.1_-_925519-926193	0.0413235	YES	0.553623
SPA0857_YP_150157.1_+_949578-949748	0.185305	YES	0.670318
SPA0874_YP_150168.1_+_959520-959732	0.00206965	YES	0.521323
SPA0892_YP_150184.1_-_973613-973990	0.00255621	YES	0.521727
SPA0900_YP_150192.1_-_979736-980731	0.136051	YES	0.630303
SPA0902_YP_150194.1_+_982632-982946	0.00488914	YES	0.523666
SPA0908_YP_150200.1_-_987337-987705	0.00782519	YES	0.526102
SPA0910_YP_150202.1_-_988127-989530	0.4791	YES	0.888907
SPA0911_YP_150203.1_+_989787-991274	0.526064	YES	0.913952
SPA0918_YP_150209.1_+_996856-997608	0.0283602	YES	0.543025
SPA0920_YP_150211.1_-_998630-998854	0.177243	YES	0.663752
SPA0921_YP_150212.1_-_998851-999006	0.00366838	YES	0.522652
SPA0975_YP_150262.1_+_1047040-1048050	0.00618346	YES	0.52474
SPA0981_YP_150268.1_-_1053185-1054627	0.139788	YES	0.633331
SPA0982_YP_150269.1_-_1054751-1055620	0.0132535	YES	0.530594
SPA0989_YP_150275.1_+_1062376-1063035	0.0287249	YES	0.543323
SPA0993_YP_150279.1_-_1066823-1067053	0.00358065	YES	0.522579
SPA0994_YP_150280.1_+_1067191-1067565	0.093317	YES	0.595758
SPA0997_YP_150283.1_+_1068872-1068988	0.461879	YES	0.878759
SPA1001_YP_150286.1_-_1073710-1074459	0.290287	YES	0.755506
SPA1002_YP_150287.1_-_1075444-1075773	0.06705	YES	0.574521
SPA1007_YP_150292.1_-_1080441-1080632	0.24082	YES	0.715576
SPA1013_YP_150297.1_-_1085783-1085923	0.2296	YES	0.706439
SPA1017_YP_150301.1_-_1088316-1088723	0.125886	YES	0.622076
SPA1018_YP_150302.1_+_1089406-1090128	0.349876	YES	0.801921
SPA1035_YP_150318.1_+_1106220-1106363	0.258384	YES	0.729836
SPA1059_YP_150342.1_-_1129342-1130049	0.00209532	YES	0.521344
SPA1122_YP_150395.1_-_1189922-1190764	0.017319	YES	0.533949
SPA1131_YP_150404.1_+_1200987-1202735	0.180185	YES	0.666147
SPA1134_YP_150407.1_+_1204712-1205719	0.0202558	YES	0.536368
SPA1148_YP_150421.1_-_1216009-1216512	0.0476968	YES	0.558814
SPA1149_YP_150422.1_-_1216602-1216784	0.292303	YES	0.757114
SPA1163_YP_150436.1_+_1232960-1233934	0.0699684	YES	0.576884
SPA1186_YP_150456.1_-_1256896-1257780	0.17411	YES	0.661201
SPA1194_YP_150463.1_+_1264357-1265025	0.0474187	YES	0.558588
SPA1202_YP_150471.1_-_1270682-1271188	0.0859127	YES	0.589777
SPA1213_YP_150480.1_-_1281516-1282367	0.041654	YES	0.553892
SPA1214_YP_150481.1_+_1282665-1283510	0.109305	YES	0.608673
SPA1216_YP_150482.1_+_1285595-1286422	0.0237517	YES	0.539242
SPA1230_YP_150494.1_+_1297118-1298491	0.0964114	YES	0.598258
SPA1231_YP_150495.1_-_1298535-1299470	0.114622	YES	0.612969
SPA1232_YP_150496.1_+_1300158-1301990	0.129124	YES	0.624695
SPA1234_YP_150498.1_-_1302656-1303090	0.0149321	YES	0.53198
SPA1248_YP_150511.1_+_1321335-1321901	0.142628	YES	0.635632
SPA1249_YP_150512.1_+_1321913-1323115	0.151058	YES	0.642468
SPA1280_YP_150541.1_+_1353475-1354140	0.052429	YES	0.562662
SPA1281_YP_150542.1_-_1354196-1356316	0.249876	YES	0.722936
SPA1303_YP_150563.1_-_1384591-1384734	0.101118	YES	0.602059
SPA1342_YP_150599.1_-_1422559-1422741	0.325158	YES	0.782985
SPA1345_YP_150602.1_+_1426142-1426828	0.0388799	YES	0.551629
SPA1352_YP_150609.1_+_1433167-1433508	0.106064	YES	0.606054
SPA1355_YP_150612.1_+_1434962-1435267	0.156727	YES	0.64707
SPA1363_YP_150620.1_+_1442609-1443757	0.06248	YES	0.570818
SPA1367_YP_150623.1_-_1447303-1448202	0.00450584	YES	0.523348
SPA1368_YP_150624.1_+_1448322-1449575	0.0797086	YES	0.584763
SPA1369_YP_150625.1_+_1449934-1450221	0.583935	YES	0.939376
SPA1373_YP_150628.1_-_1452139-1452309	0.144642	YES	0.637264
SPA1386_YP_150640.1_-_1466891-1468294	0.026023	YES	0.541107
SPA1400_YP_150653.1_+_1483105-1483740	0.0170906	YES	0.53376
SPA1408_YP_150661.1_+_1491462-1491929	0.0193395	YES	0.535613
SPA1421_YP_150674.1_+_1501323-1502177	0.49572	YES	0.898217
SPA1423_YP_150676.1_+_1503353-1504378	0.0290288	YES	0.543573
SPA1441_YP_150692.1_-_1519053-1520045	0.110729	YES	0.609823
SPA1442_YP_150693.1_-_1520035-1520709	0.071332	YES	0.577987
SPA1445_YP_150696.1_-_1522018-1522266	0.191664	YES	0.675501
SPA1447_YP_150698.1_-_1522546-1522761	0.214676	YES	0.69427
SPA1448_YP_150699.1_-_1522855-1523544	0.0981977	YES	0.599701
SPA1449_YP_150700.1_-_1523541-1524323	0.113998	YES	0.612465
SPA1452_YP_150703.1_-_1525244-1525831	0.200682	YES	0.682855
SPA1453_YP_150704.1_-_1525847-1527301	0.429124	YES	0.858116
SPA1455_YP_150706.1_-_1527774-1528364	0.0945407	YES	0.596747
SPA1456_YP_150707.1_-_1528371-1528697	0.359613	YES	0.809226
SPA1461_YP_150712.1_+_1532699-1535461	0.0715946	YES	0.5782
SPA1476_YP_150725.1_+_1552681-1552917	0.124515	YES	0.620967
SPA1477_YP_150726.1_+_1552999-1553238	0.26164	YES	0.732472
SPA1478_YP_150727.1_+_1553316-1553555	0.222313	YES	0.700499
SPA1483_YP_150730.1_-_1557668-1558414	0.0243196	YES	0.539709
SPA1494_YP_150739.1_-_1568699-1571077	0.02106	YES	0.537029
SPA1497_YP_150742.1_+_1573598-1573789	0.132833	YES	0.627698
SPA1506_YP_150751.1_-_1582179-1583162	0.045267	YES	0.556836
SPA1510_YP_150755.1_-_1584164-1584706	0.11348	YES	0.612046
SPA1514_YP_150759.1_-_1589455-1590309	0.123718	YES	0.620323
SPA1516_YP_150761.1_+_1590790-1591722	0.041943	YES	0.554128
SPA1526_YP_150771.1_+_1599475-1601727	0.446202	YES	0.869092
SPA1536_YP_150781.1_-_1609798-1610283	0.151447	YES	0.642784
SPA1560_YP_150804.1_+_1637126-1638412	0.153838	YES	0.644724
SPA1579_YP_150822.1_+_1649325-1649573	0.204027	YES	0.685583
SPA1599_YP_150838.1_-_1663843-1664400	0.0961495	YES	0.598046
SPA1602_YP_150841.1_+_1665205-1665468	0.2099	YES	0.690375
SPA1604_YP_150843.1_+_1666214-1666735	0.166071	YES	0.654662
SPA1606_YP_150845.1_+_1668029-1668838	0.000711839	YES	0.520193
SPA1637_YP_150876.1_-_1702507-1702764	0.0518986	YES	0.562231
SPA1643_YP_150882.1_-_1707595-1708419	0.0926452	YES	0.595216
SPA1644_YP_150883.1_-_1708400-1709038	0.0496178	YES	0.560377
SPA1665_YP_150902.1_-_1726932-1727180	0.17153	YES	0.659102
SPA1667_YP_150904.1_-_1730778-1731731	0.211828	YES	0.691947
SPA1668_YP_150905.1_-_1731746-1733407	0.168821	YES	0.656898
SPA1672_YP_150909.1_-_1736284-1737066	0.338931	YES	0.793602
SPA1673_YP_150910.1_-_1737080-1737835	0.0622257	YES	0.570612
SPA1674_YP_150911.1_-_1737856-1739067	0.0595981	YES	0.568482
SPA1675_YP_150912.1_-_1739094-1739792	0.358192	YES	0.808166
SPA1676_YP_150913.1_-_1739804-1740208	0.00476727	YES	0.523565
SPA1677_YP_150914.1_-_1740212-1740628	0.0566508	YES	0.56609
SPA1679_YP_150916.1_+_1741536-1741829	0.45015	YES	0.871565
SPA1683_YP_150920.1_-_1745102-1745749	0.0339013	YES	0.547562
SPA1694_YP_150930.1_+_1753440-1754015	0.0285669	YES	0.543194
SPA1705_YP_150941.1_-_1765951-1766271	0.047269	YES	0.558466
SPA1706_YP_150942.1_-_1766403-1766729	0.353989	YES	0.805018
SPA1707_YP_150943.1_-_1766791-1767246	0.108883	YES	0.608332
SPA1712_YP_150947.1_+_1770018-1770851	0.0403903	YES	0.552861
SPA1730_YP_150963.1_-_1791952-1792119	0.48491	YES	0.892216
SPA1737_YP_150969.1_-_1797807-1798169	0.0452024	YES	0.556783
SPA1745_YP_150977.1_-_1805163-1805966	0.0726039	YES	0.579017
SPA1748_YP_150980.1_-_1807352-1808818	0.020488	YES	0.536559
SPA1757_YP_150987.1_+_1817795-1817905	0.153805	YES	0.644698
SPA1759_YP_150989.1_+_1818409-1820094	0.14154	YES	0.63475
SPA1761_YP_150991.1_-_1820462-1820782	0.136344	YES	0.630541
SPA1768_YP_150997.1_-_1824799-1825578	0.151513	YES	0.642838
SPA1773_YP_151001.1_+_1828584-1829246	0.00934173	YES	0.527358
SPA1803_YP_151031.1_-_1865623-1867470	0.0911907	YES	0.594041
SPA1807_YP_151035.1_-_1874281-1875084	0.0592019	YES	0.56816
SPA1818_YP_151045.1_-_1886813-1887496	0.0138039	YES	0.531048
SPA1836_YP_151061.1_-_1908956-1910299	0.0866486	YES	0.590371
SPA1839_YP_151064.1_-_1915298-1915792	0.0406166	YES	0.553046
SPA1848_YP_151073.1_+_1924179-1924856	0.132309	YES	0.627274
SPA1850_YP_151074.1_+_1925210-1925422	0.0578992	YES	0.567103
SPA1926_YP_151148.1_+_2006249-2008471	0.318911	YES	0.778121
SPA1929_YP_151151.1_+_2010023-2010163	0.272546	YES	0.741277
SPA1930_YP_151152.1_+_2010150-2010410	0.154653	YES	0.645386
SPA1951_YP_151173.1_+_2029859-2030767	0.0539709	YES	0.563914
SPA1953_YP_151174.1_-_2033135-2033308	0.173488	YES	0.660695
SPA1966_YP_151186.1_+_2048468-2049751	0.250807	YES	0.723692
SPA1974_YP_151194.1_+_2055697-2057172	0.0193371	YES	0.535611
SPA1984_YP_151204.1_+_2067179-2067565	0.372084	YES	0.818438
SPA1993_YP_151208.1_-_2071907-2072695	0.252882	YES	0.725376
SPA2006_YP_151221.1_-_2084775-2085983	0.0203601	YES	0.536453
SPA2012_YP_151227.1_-_2092963-2093208	0.188291	YES	0.672752
SPA2017_YP_151232.1_-_2096875-2098824	0.0266988	YES	0.541662
SPA2020_YP_151235.1_-_2101726-2102436	0.136397	YES	0.630583
SPA2044_YP_151258.1_-_2130811-2131353	0.0993544	YES	0.600635
SPA2053_YP_151267.1_-_2139222-2139554	0.0280318	YES	0.542755
SPA2059_YP_151273.1_+_2147847-2149067	0.0832938	YES	0.587661
SPA2097_YP_151303.1_+_2182839-2184050	0.0930821	YES	0.595569
SPA2118_YP_151323.1_+_2202738-2203148	0.123933	YES	0.620496
SPA2127_YP_151331.1_+_2212484-2213230	0.0310443	YES	0.545224
SPA2128_YP_151332.1_+_2213547-2214449	0.155856	YES	0.646363
SPA2149_YP_151353.1_+_2238679-2240934	0.250089	YES	0.723109
SPA2154_YP_151358.1_+_2243766-2244347	0.0208527	YES	0.536859
SPA2162_YP_151366.1_-_2252849-2253085	0.148961	YES	0.640767
SPA2166_YP_151370.1_+_2256198-2256443	0.110259	YES	0.609443
SPA2170_YP_151373.1_+_2260150-2260368	0.300995	YES	0.764023
SPA2174_YP_151375.1_+_2262025-2262333	0.0651807	YES	0.573007
SPA2180_YP_151381.1_-_2268549-2269241	0.141219	YES	0.63449
SPA2205_YP_151404.1_-_2293997-2295778	0.0360829	YES	0.549345
SPA2206_YP_151405.1_-_2295863-2296681	0.186732	YES	0.67148
SPA2218_YP_151417.1_+_2308376-2309230	0.0169284	YES	0.533627
SPA2235_YP_151433.1_-_2327671-2329569	0.0406039	YES	0.553036
SPA2254_YP_151452.1_+_2347331-2348881	0.0240619	YES	0.539497
SPA2257_YP_151454.1_-_2349534-2350103	0.132552	YES	0.62747
SPA2258_YP_151455.1_+_2350089-2350826	0.00117044	YES	0.520575
SPA2264_YP_151461.1_+_2356953-2358008	0.027512	YES	0.542329
SPA2271_YP_151468.1_-_2364731-2365003	0.0627275	YES	0.571019
SPA2286_YP_151483.1_+_2382969-2383103	0.0992789	YES	0.600574
SPA2299_YP_151496.1_+_2395392-2395634	0.0516628	YES	0.562039
SPA2311_YP_151508.1_+_2405568-2405894	0.0666743	YES	0.574217
SPA2331_YP_151528.1_+_2429321-2430115	0.120205	YES	0.617481
SPA2346_YP_151542.1_-_2440352-2441446	0.0543803	YES	0.564247
SPA2370_YP_151564.1_-_2472406-2472765	0.14001	YES	0.63351
SPA2371_YP_151565.1_-_2472823-2473047	0.0721896	YES	0.578681
SPA2380_YP_151573.1_+_2480417-2481178	0.0389713	YES	0.551704
SPA2382_YP_151575.1_+_2483728-2485053	0.0158525	YES	0.532739
SPA2383_YP_151576.1_+_2485019-2485777	0.0413535	YES	0.553647
SPA2390_YP_151583.1_-_2492417-2494348	0.0936953	YES	0.596064
SPA2392_YP_151585.1_-_2495728-2496417	0.0565891	YES	0.56604
SPA2397_YP_151590.1_-_2508517-2508954	0.0629037	YES	0.571162
SPA2412_YP_151605.1_-_2515978-2516124	0.11639	YES	0.614398
SPA2414_YP_151607.1_+_2516877-2517566	0.302228	YES	0.764999
SPA2443_YP_151635.1_+_2538924-2539664	0.0665055	YES	0.57408
SPA2451_YP_151642.1_-_2548252-2548707	0.008515	YES	0.526673
SPA2454_YP_151645.1_-_2552738-2553313	0.149383	YES	0.641109
SPA2459_YP_151650.1_-_2556212-2557156	0.0741707	YES	0.580284
SPA2463_YP_151653.1_-_2562231-2562971	0.114072	YES	0.612524
SPA2464_YP_151654.1_-_2563672-2564166	0.00337776	YES	0.52241
SPA2471_YP_151660.1_-_2574363-2576609	0.0696524	YES	0.576628
SPA2475_YP_151664.1_-_2578378-2578848	0.0529718	YES	0.563103
SPA2482_YP_151670.1_-_2585994-2587298	0.109171	YES	0.608564
SPA2485_YP_151673.1_-_2589246-2589731	0.0862347	YES	0.590037
SPA2491_YP_151679.1_-_2592217-2592342	0.0085517	YES	0.526704
SPA2492_YP_151680.1_-_2592670-2594178	0.0187933	YES	0.535164
SPA2500_YP_151687.1_+_2599923-2600417	0.111572	YES	0.610504
SPA2509_YP_151695.1_+_2607736-2609103	0.0380239	YES	0.55093
SPA2510_YP_151696.1_-_2609159-2609929	0.0920835	YES	0.594762
SPA2511_YP_151697.1_-_2610007-2610786	0.0270564	YES	0.541955
SPA2513_YP_151699.1_+_2612219-2613133	0.0659863	YES	0.573659
SPA2521_YP_151702.1_-_2619961-2622534	0.0418791	YES	0.554076
SPA2525_YP_151706.1_+_2625513-2625851	0.198298	YES	0.68091
SPA2540_YP_151721.1_-_2639385-2639975	0.0989935	YES	0.600343
SPA2549_YP_151730.1_+_2656921-2658330	0.0659939	YES	0.573666
SPA2555_YP_151734.1_-_2662672-2662890	0.0788691	YES	0.584084
SPA2558_YP_151737.1_-_2664540-2667320	0.0908388	YES	0.593757
SPA2564_YP_151743.1_+_2670036-2670758	0.302154	YES	0.764941
SPA2580_YP_151759.1_-_2679379-2680443	0.142819	YES	0.635786
SPA2583_YP_151762.1_+_2683202-2684245	0.000626236	YES	0.520121
SPA2593_YP_151772.1_-_2691890-2692117	0.0556371	YES	0.565268
SPA2594_YP_151773.1_-_2692117-2692350	0.00670359	YES	0.525172
SPA2598_YP_151777.1_-_2693473-2693715	0.0324217	YES	0.546351
SPA2599_YP_151778.1_+_2693832-2694464	0.103386	YES	0.603891
SPA2627_YP_151805.1_-_2729053-2730573	0.526064	YES	0.913952
SPA2633_YP_151810.1_-_2739414-2741588	0.132199	YES	0.627185
SPA2642_YP_151818.1_+_2750301-2750420	0.225445	YES	0.703053
SPA2652_YP_151828.1_-_2760978-2761457	0.0870054	YES	0.59066
SPA2684_YP_151853.1_-_2786372-2786557	0.0204563	YES	0.536533
SPA2723_YP_151892.1_+_2825197-2825406	0.395189	YES	0.835028
SPA2726_YP_151895.1_-_2827875-2828327	0.0447867	YES	0.556445
SPA2731_YP_151900.1_-_2830621-2830863	0.119344	YES	0.616786
SPA2732_YP_151901.1_-_2830888-2832066	0.087327	YES	0.59092
SPA2733_YP_151902.1_+_2832382-2833311	0.201999	YES	0.683929
SPA2736_YP_151905.1_-_2836617-2838248	0.364067	YES	0.812536
SPA2740_YP_151909.1_-_2839225-2841282	0.278776	YES	0.746289
SPA2741_YP_151910.1_-_2841301-2842323	0.675126	YES	0.967851
SPA2742_YP_151911.1_-_2842393-2843622	0.691482	YES	0.971621
SPA2743_YP_151912.1_-_2843650-2845431	0.00770105	YES	0.525999
SPA2750_YP_151919.1_-_2849782-2850792	0.0392763	YES	0.551952
SPA2755_YP_151924.1_-_2855018-2856136	0.493168	YES	0.896818
SPA2758_YP_151927.1_+_2858924-2859367	0.213336	YES	0.693177
SPA2759_YP_151928.1_+_2859762-2859980	0.165791	YES	0.654434
SPA2760_YP_151929.1_+_2860250-2860531	0.29046	YES	0.755644
SPA2765_YP_151932.1_-_2862802-2863128	0.119777	YES	0.617136
SPA2769_YP_151936.1_+_2867604-2868515	0.0514709	YES	0.561883
SPA2776_YP_151943.1_+_2874781-2875545	0.263507	YES	0.733982
SPA2781_YP_151948.1_-_2879507-2880640	0.759874	YES	0.983764
SPA2783_YP_151950.1_-_2881436-2882197	0.00944196	YES	0.527441
SPA2801_YP_151965.1_+_2899311-2900264	0.144527	YES	0.637171
SPA2812_YP_151974.1_+_2912423-2913010	0.0195206	YES	0.535762
SPA2815_YP_151977.1_+_2916601-2917101	0.0092895	YES	0.527315
SPA2818_YP_151980.1_+_2918178-2919296	0.108966	YES	0.608399
SPA2894_YP_152049.1_-_3004252-3005319	0.171448	YES	0.659035
SPA2895_YP_152050.1_-_3005316-3006059	0.0177489	YES	0.534303
SPA2902_YP_152056.1_-_3013142-3013369	0.106807	YES	0.606655
SPA2906_YP_152059.1_-_3015195-3015947	0.122523	YES	0.619356
SPA2911_YP_152064.1_-_3021308-3022021	0.0664206	YES	0.574011
SPA2928_YP_152081.1_+_3039347-3039676	0.156554	YES	0.646929
SPA2934_YP_152084.1_-_3042398-3043057	0.00719146	YES	0.525576
SPA2940_YP_152090.1_-_3048310-3049473	0.0515486	YES	0.561946
SPA2965_YP_152115.1_+_3071589-3071879	0.0762848	YES	0.581994
SPA2982_YP_152131.1_+_3087309-3087605	0.366916	YES	0.814641
SPA3006_YP_152155.1_-_3109444-3110499	0.120388	YES	0.61763
SPA3023_YP_152171.1_+_3126415-3126825	0.223675	YES	0.70161
SPA3055_YP_152202.1_+_3159147-3160622	0.0183918	YES	0.534833
SPA3070_YP_152217.1_-_3177460-3178761	0.0269875	YES	0.541899
SPA3097_YP_152242.1_+_3206842-3207210	0.136554	YES	0.630711
SPA3109_YP_152252.1_-_3215443-3216807	0.203599	YES	0.685234
SPA3135_YP_152276.1_+_3245856-3246446	0.0682239	YES	0.575472
SPA3147_YP_152287.1_-_3254940-3256829	0.0213608	YES	0.537277
SPA3160_YP_152297.1_-_3269319-3269651	0.0351707	YES	0.548599
SPA3167_YP_152304.1_+_3276121-3277554	0.0295539	YES	0.544003
SPA3187_YP_152324.1_+_3291877-3293310	0.144945	YES	0.63751
SPA3215_YP_152351.1_+_3321975-3323342	0.106119	YES	0.606099
SPA3225_YP_152360.1_-_3332446-3333075	0.0403319	YES	0.552814
SPA3227_YP_152362.1_+_3334547-3335017	0.157516	YES	0.64771
SPA3228_YP_152363.1_+_3335382-3335645	0.00639028	YES	0.524912
SPA3229_YP_152364.1_+_3335749-3336015	0.00316177	YES	0.522231
SPA3241_YP_152376.1_-_3350040-3351083	0.0234277	YES	0.538976
SPA3246_YP_152381.1_+_3356619-3357089	0.0486673	YES	0.559604
SPA3258_YP_152392.1_+_3368795-3371908	0.00456168	YES	0.523394
SPA3287_YP_152415.1_-_3393753-3394187	0.037126	YES	0.550197
SPA3295_YP_152423.1_-_3397101-3397415	0.178825	YES	0.665039
SPA3298_YP_152426.1_-_3398215-3398406	0.0597344	YES	0.568592
SPA3301_YP_152429.1_-_3399548-3399880	0.0354929	YES	0.548863
SPA3305_YP_152433.1_-_3401328-3401933	0.0149038	YES	0.531956
SPA3312_YP_152440.1_-_3405945-3408059	0.0631355	YES	0.57135
SPA3320_YP_152448.1_+_3412311-3412514	0.265302	YES	0.735433
SPA3331_YP_152458.1_-_3421323-3421727	0.0147274	YES	0.531811
SPA3338_YP_152465.1_-_3427612-3428184	0.0892037	YES	0.592436
SPA3344_YP_152471.1_+_3439234-3441453	0.115568	YES	0.613733
SPA3371_YP_152496.1_+_3469850-3472168	0.0213177	YES	0.537241
SPA3379_YP_152504.1_-_3479639-3482032	0.0823042	YES	0.586861
SPA3380_YP_152505.1_+_3482626-3485331	0.117897	YES	0.615616
SPA3381_YP_152506.1_-_3485405-3486163	0.146062	YES	0.638415
SPA3399_YP_152522.1_+_3507489-3508703	0.0749184	YES	0.580889
SPA3404_YP_152527.1_+_3513449-3513865	0.166192	YES	0.65476
SPA3417_YP_152540.1_+_3525122-3525247	0.366	YES	0.813965
SPA3422_YP_152545.1_-_3529575-3531050	0.0728841	YES	0.579243
SPA3441_YP_152564.1_+_3550863-3551243	0.0993499	YES	0.600631
SPA3460_YP_152583.1_-_3570658-3572247	0.0610159	YES	0.569631
SPA3464_YP_152586.1_+_3575096-3576124	0.0179415	YES	0.534462
SPA3472_YP_152593.1_-_3587315-3590746	0.0793602	YES	0.584481
SPA3474_YP_152595.1_-_3591952-3594252	0.0707098	YES	0.577484
SPA3478_YP_152598.1_+_3598085-3599656	0.0513105	YES	0.561753
SPA3490_YP_152610.1_+_3612862-3613869	0.0132184	YES	0.530565
SPA3502_YP_152619.1_+_3624443-3624982	0.161593	YES	0.651023
SPA3508_YP_152625.1_-_3630850-3631152	0.0310754	YES	0.545249
SPA3518_YP_152635.1_-_3642515-3643315	0.0614945	YES	0.57002
SPA3524_YP_152640.1_+_3647879-3648865	0.165585	YES	0.654267
SPA3531_YP_152647.1_-_3656017-3657555	0.170912	YES	0.6586
SPA3553_YP_152666.1_-_3683982-3684449	0.103213	YES	0.603752
SPA3557_YP_152670.1_+_3687063-3688346	0.00548707	YES	0.524162
SPA3568_YP_152681.1_-_3699710-3700408	0.0186899	YES	0.535078
SPA3569_YP_152682.1_-_3700431-3701441	0.148528	YES	0.640415
SPA3575_YP_152688.1_-_3706518-3707552	0.0156603	YES	0.532581
SPA3589_YP_152702.1_+_3718069-3718953	0.00423779	YES	0.523125
SPA3611_YP_152721.1_+_3747889-3748569	0.0646359	YES	0.572566
SPA3628_YP_152737.1_+_3767269-3767592	0.152829	YES	0.643905
SPA3630_YP_152739.1_-_3767962-3768822	0.0765678	YES	0.582223
SPA3633_YP_152742.1_-_3771796-3772083	0.135149	YES	0.629573
SPA3676_YP_152781.1_+_3814515-3817250	0.138017	YES	0.631896
SPA3682_YP_152786.1_-_3825575-3826975	0.123026	YES	0.619763
SPA3686_YP_152790.1_+_3828376-3830022	0.193128	YES	0.676694
SPA3689_YP_152793.1_+_3832924-3833826	0.00824489	YES	0.52645
SPA3695_YP_152799.1_-_3838374-3839147	0.0682892	YES	0.575524
SPA3699_YP_152803.1_+_3842594-3843904	0.0184352	YES	0.534869
SPA3716_YP_152820.1_+_3860327-3861319	0.0246025	YES	0.539941
SPA3738_YP_152833.1_-_3882598-3884034	0.126811	YES	0.622824
SPA3741_YP_152836.1_+_3886270-3886530	0.114677	YES	0.613014
SPA3744_YP_152839.1_+_3889487-3891031	0.0912851	YES	0.594117
SPA3754_YP_152849.1_-_3899382-3900863	0.177847	YES	0.664243
SPA3777_YP_152866.1_-_3921335-3922504	0.124848	YES	0.621237
SPA3787_YP_152875.1_+_3930237-3930440	0.283087	YES	0.749748
SPA3805_YP_152893.1_-_3946779-3947732	0.062666	YES	0.570969
SPA3844_YP_152924.1_+_3988545-3989048	0.161698	YES	0.651108
SPA3847_YP_152927.1_-_3992340-3993389	0.00463091	YES	0.523452
SPA3869_YP_152948.1_+_4016262-4016699	0.0119644	YES	0.529528
SPA3881_YP_152959.1_-_4027144-4028175	0.242052	YES	0.716578
SPA3882_YP_152960.1_+_4028357-4029457	0.414908	YES	0.848642
SPA3903_YP_152981.1_+_4048631-4049131	0.130306	YES	0.625652
SPA3913_YP_152990.1_+_4058066-4058197	0.00690082	YES	0.525335
SPA3917_YP_152994.1_+_4061547-4063082	0.0355647	YES	0.548921
SPA3925_YP_153002.1_-_4069191-4069787	0.116666	YES	0.614621
SPA3931_YP_153007.1_+_4075163-4075402	0.250163	YES	0.723169
SPA3936_YP_153012.1_-_4079161-4080132	0.0196833	YES	0.535896
SPA3937_YP_153013.1_-_4080226-4081251	0.0017697	YES	0.521073
SPA3941_YP_153017.1_-_4084928-4086718	0.0448761	YES	0.556518
SPA3942_YP_153018.1_-_4087174-4087491	0.00194478	YES	0.521219
SPA3944_YP_153020.1_+_4088919-4091351	0.0614322	YES	0.569969
SPA3951_YP_153026.1_+_4100688-4101578	0.253151	YES	0.725594
SPA3957_YP_153032.1_-_4109003-4111654	0.162026	YES	0.651374
SPA3987_YP_153051.1_+_4136734-4137162	0.0737053	YES	0.579908
SPA3994_YP_153058.1_-_4148231-4148668	0.0261384	YES	0.541202
SPA4007_YP_153071.1_+_4159015-4159287	0.204038	YES	0.685592
SPA4009_YP_153073.1_-_4160033-4160488	0.0107589	YES	0.528531
SPA4029_YP_153087.1_+_4186840-4186941	0.284853	YES	0.751162
SPA4030_YP_153088.1_+_4186976-4187515	0.0854981	YES	0.589442
SPA4032_YP_153090.1_-_4188428-4188700	0.0357134	YES	0.549043
SPA4039_YP_153097.1_+_4197023-4197268	0.603229	YES	0.946536
SPA4049_YP_153107.1_+_4208372-4209289	0.323111	YES	0.781394
SPA4062_YP_153120.1_-_4220315-4221298	0.0507942	YES	0.561333
SPA4065_YP_153123.1_+_4224075-4225268	0.105108	YES	0.605282
SPA4073_YP_153131.1_+_4232777-4233409	0.01673	YES	0.533463
SPA4075_YP_153133.1_+_4234784-4236103	0.255797	YES	0.72774
SPA4077_YP_153135.1_+_4237394-4251076	0.356279	YES	0.806736
SPA4078_YP_153136.1_+_4251116-4253182	0.0757729	YES	0.58158
SPA4081_YP_153139.1_-_4255894-4256217	0.00406504	YES	0.522982
SPA4093_YP_153149.1_+_4267779-4267925	0.0408358	YES	0.553225
SPA4113_YP_153169.1_-_4289571-4290332	0.0857636	YES	0.589656
SPA4120_YP_153176.1_-_4300527-4300793	0.394546	YES	0.834575
SPA4129_YP_153183.1_-_4311279-4311629	0.203916	YES	0.685493
SPA4130_YP_153184.1_-_4311650-4311847	0.446768	YES	0.869448
SPA4132_YP_153186.1_-_4312154-4313029	0.20549	YES	0.686776
SPA4147_YP_153200.1_+_4324850-4326496	0.0928173	YES	0.595355
SPA4153_YP_153206.1_+_4330219-4330365	0.0578766	YES	0.567085
SPA4178_YP_153227.1_+_4354406-4354714	0.0858252	YES	0.589706
SPA4184_YP_153233.1_+_4360431-4360856	0.0194097	YES	0.535671
SPA4194_YP_153243.1_+_4368625-4370247	0.0328442	YES	0.546697
SPA4195_YP_153244.1_-_4370311-4370631	0.0798263	YES	0.584858
SPA4198_YP_153247.1_-_4371976-4372731	0.0298817	YES	0.544271
SPA4207_YP_153256.1_+_4379267-4379473	0.0258645	YES	0.540977
SPA4213_YP_153262.1_-_4382107-4382742	0.0832593	YES	0.587633
SPA4220_YP_153268.1_-_4390039-4390887	0.0308759	YES	0.545086
SPA4221_YP_153269.1_+_4390975-4391361	0.0883886	YES	0.591777
SPA4229_YP_153277.1_+_4398632-4400362	0.218074	YES	0.697042
SPA4239_YP_153286.1_+_4413254-4413640	0.0118978	YES	0.529473
SPA4248_YP_153295.1_+_4419374-4421347	0.0365743	YES	0.549746
SPA4249_YP_153296.1_+_4421425-4421667	0.163073	YES	0.652225
SPA4253_YP_153300.1_+_4424969-4425139	0.209313	YES	0.689896
SPA4256_YP_153303.1_-_4428431-4429378	0.13001	YES	0.625413
SPA4261_YP_153307.1_-_4434044-4434979	0.0901781	YES	0.593223
SPA4272_YP_153318.1_-_4444239-4444385	0.478438	YES	0.888526
SPA4273_YP_153319.1_-_4444464-4444952	0.00423288	YES	0.523121
SPA4281_YP_153327.1_-_4454762-4455760	0.0429744	YES	0.554968
SPA4290_YP_153335.1_+_4463654-4463890	0.268761	YES	0.738226
SPA4307_YP_153348.1_-_4476999-4477643	0.192561	YES	0.676232
SPA4326_YP_153365.1_+_4501003-4501776	0.0765453	YES	0.582205
SPA4327_YP_153366.1_-_4501777-4502790	0.0483535	YES	0.559348
SPA4341_YP_153379.1_-_4516322-4516465	0.0202702	YES	0.536379
SPA4345_YP_153383.1_-_4518006-4519394	0.00150671	YES	0.520854
SPA4350_YP_153388.1_+_4526283-4526585	0.0153409	YES	0.532317
SPA4356_YP_153394.1_-_4534842-4535303	0.214987	YES	0.694524
SPA4363_YP_153401.1_-_4540097-4540555	0.0405213	YES	0.552968
SPA4375_YP_153410.1_+_4548448-4549065	0.0604208	YES	0.569149
SPA4401_YP_153436.1_-_4575613-4576698	0.0371914	YES	0.55025
SPA4403_YP_153438.1_-_4577314-4579851	0.0958341	YES	0.597792
SPA4404_YP_153439.1_-_4579897-4580580	0.0469068	YES	0.558171
SPA4405_YP_153440.1_-_4580651-4581196	0.0660849	YES	0.573739
SPA4409_YP_153443.1_+_4583979-4584119	0.0843546	YES	0.588518

## Sheet: CT_02021853
Protein	Score	T3S protein or Not	Probability
SeD_A0002_YP_002213956.1_+_337-2799	0.0590027	YES	0.567999
SeD_A0004_YP_002213958.1_+_3734-5020	0.0158782	YES	0.532761
SeD_A0011_YP_002213965.1_-_10841-11236	0.215435	YES	0.694889
SeD_A0018_YP_002213972.1_-_17045-17488	0.135405	YES	0.62978
SeD_A0020_YP_002213974.1_+_20060-23056	0.0217777	YES	0.53762
SeD_A0026_YP_002213980.1_+_29474-29980	0.0673148	YES	0.574735
SeD_A0033_YP_002213985.1_-_34377-34817	0.141464	YES	0.634688
SeD_A0035_YP_002213987.1_+_35340-37058	0.122347	YES	0.619214
SeD_A0041_YP_002213993.1_+_44310-46025	0.0481309	YES	0.559167
SeD_A0047_YP_002213997.1_-_52278-52541	0.184337	YES	0.669529
SeD_A0090_YP_002214038.1_-_96136-96261	0.0673162	YES	0.574737
SeD_A0097_YP_002214045.1_-_101309-103669	0.0118464	YES	0.529431
SeD_A0120_YP_002214064.1_-_125289-126689	0.0312346	YES	0.545379
SeD_A0122_YP_002214066.1_-_127783-129354	0.0134281	YES	0.530738
SeD_A0143_YP_002214086.1_+_152488-153405	0.0645052	YES	0.57246
SeD_A0155_YP_002214096.1_-_163598-164983	0.0966567	YES	0.598456
SeD_A0166_YP_002214107.1_+_176197-178086	0.22244	YES	0.700603
SeD_A0171_YP_002214112.1_-_181126-182751	0.158898	YES	0.648833
SeD_A0177_YP_002214118.1_+_188800-190071	0.128562	YES	0.624241
SeD_A0179_YP_002214120.1_+_191054-191821	0.0130269	YES	0.530406
SeD_A0180_YP_002214121.1_-_191851-192645	0.0214539	YES	0.537353
SeD_A0191_YP_002214132.1_-_205305-205988	0.203613	YES	0.685246
SeD_A0193_YP_002214134.1_-_206790-206903	0.00487001	YES	0.52365
SeD_A0199_YP_002214140.1_-_211050-211529	0.029021	YES	0.543566
SeD_A0208_YP_002214149.1_+_221469-223580	0.191402	YES	0.675287
SeD_A0212_YP_002214153.1_-_227558-227671	0.156438	YES	0.646835
SeD_A0214_YP_002214155.1_+_228310-228870	0.0557482	YES	0.565358
SeD_A0218_YP_002214159.1_+_232911-233387	0.0220581	YES	0.53785
SeD_A0221_YP_002214162.1_-_234864-236144	0.00102043	YES	0.52045
SeD_A0229_YP_002214169.1_+_242145-243572	0.107229	YES	0.606996
SeD_A0231_YP_002214171.1_-_244939-247971	0.0871176	YES	0.59075
SeD_A0241_YP_002214180.1_+_257987-258544	0.119468	YES	0.616886
SeD_A0247_YP_002214186.1_+_265755-266240	0.161178	YES	0.650685
SeD_A0255_YP_002214194.1_+_275021-276784	0.0790733	YES	0.584249
SeD_A0266_YP_002214205.1_-_285834-286238	0.246097	YES	0.719867
SeD_A0269_YP_002214208.1_-_287857-288888	0.22808	YES	0.705201
SeD_A0279_YP_002214212.1_-_296729-297643	0.0880895	YES	0.591536
SeD_A0282_YP_002214215.1_+_299933-300703	0.0920835	YES	0.594762
SeD_A0292_YP_002214223.1_-_309412-309906	0.102704	YES	0.603341
SeD_A0297_YP_002214228.1_+_315289-316797	0.0475906	YES	0.558728
SeD_A0303_YP_002214234.1_+_320393-321697	0.109171	YES	0.608564
SeD_A0305_YP_002214236.1_+_322753-323109	0.0321774	YES	0.546151
SeD_A0310_YP_002214241.1_+_329155-331344	0.161977	YES	0.651334
SeD_A0311_YP_002214242.1_+_331368-331814	0.211302	YES	0.691518
SeD_A0318_YP_002214247.1_+_340677-341123	0.216058	YES	0.695398
SeD_A0325_YP_002214253.1_-_344451-344600	0.150366	YES	0.641906
SeD_A0334_YP_002214260.1_+_352232-353179	0.084801	YES	0.588878
SeD_A0342_YP_002214267.1_-_360374-361114	0.0665055	YES	0.57408
SeD_A0367_YP_002214289.1_-_382372-383130	0.0413535	YES	0.553647
SeD_A0368_YP_002214290.1_-_383096-384421	0.0363064	YES	0.549527
SeD_A0370_YP_002214292.1_-_386971-387732	0.0394221	YES	0.552071
SeD_A0376_YP_002214297.1_+_392893-393381	0.0384567	YES	0.551284
SeD_A0379_YP_002214300.1_+_395101-395325	0.0721896	YES	0.578681
SeD_A0380_YP_002214301.1_+_395359-395742	0.112671	YES	0.611393
SeD_A0383_YP_002214304.1_-_400450-401676	0.0771142	YES	0.582665
SeD_A0385_YP_002214306.1_+_404253-404717	0.25923	YES	0.730521
SeD_A0395_YP_002214316.1_+_416074-418164	0.00359943	YES	0.522595
SeD_A0407_YP_002214326.1_+_429363-431408	0.047292	YES	0.558485
SeD_A0412_YP_002214330.1_+_434901-435995	0.0543803	YES	0.564247
SeD_A0421_YP_002214337.1_+_441025-441345	0.0249447	YES	0.540222
SeD_A0430_YP_002214346.1_-_446254-447165	0.0275873	YES	0.542391
SeD_A0454_YP_002214367.1_-_472021-472518	0.0773361	YES	0.582844
SeD_A0465_YP_002214378.1_-_480740-480982	0.0516628	YES	0.562039
SeD_A0493_YP_002214405.1_+_511418-511690	0.0627275	YES	0.571019
SeD_A0501_YP_002214411.1_-_518413-519468	0.027512	YES	0.542329
SeD_A0509_YP_002214419.1_+_526670-527239	0.132552	YES	0.62747
SeD_A0512_YP_002214421.1_-_527892-529442	0.0240619	YES	0.539497
SeD_A0519_YP_002214428.1_-_532563-535712	0.00978043	YES	0.527721
SeD_A0553_YP_002214460.1_-_567448-568329	0.0157921	YES	0.532689
SeD_A0565_YP_002214472.1_+_579997-580815	0.186732	YES	0.67148
SeD_A0566_YP_002214473.1_+_580900-582681	0.0413929	YES	0.553679
SeD_A0587_YP_002214494.1_-_604804-605241	0.199596	YES	0.681969
SeD_A0591_YP_002214498.1_+_607533-608090	0.039276	YES	0.551952
SeD_A0594_YP_002214499.1_+_608741-609433	0.123206	YES	0.619908
SeD_A0622_YP_002214524.1_-_628192-628311	0.0690403	YES	0.576133
SeD_A0621_YP_002214525.1_+_628305-628421	0.0921111	YES	0.594784
SeD_A0631_YP_002214534.1_+_635238-635675	0.0629037	YES	0.571162
SeD_A0636_YP_002214538.1_+_637822-637944	0.071055	YES	0.577763
SeD_A0641_YP_002214543.1_+_643254-644546	0.0982945	YES	0.599779
SeD_A0649_YP_002214551.1_+_650176-652089	0.0338551	YES	0.547524
SeD_A0651_YP_002214553.1_-_652846-653025	0.15735	YES	0.647576
SeD_A0661_YP_002214562.1_-_663139-663384	0.129721	YES	0.625179
SeD_A0666_YP_002214566.1_+_666804-667040	0.129525	YES	0.625021
SeD_A0671_YP_002214571.1_+_671911-672096	0.0808593	YES	0.585693
SeD_A0676_YP_002214574.1_-_675565-676146	0.0059476	YES	0.524545
SeD_A0681_YP_002214579.1_-_678978-681233	0.250089	YES	0.723109
SeD_A0703_YP_002214599.1_-_705445-706362	0.155856	YES	0.646363
SeD_A0704_YP_002214600.1_-_706679-707425	0.0310443	YES	0.545224
SeD_A0715_YP_002214607.1_-_716763-717173	0.123933	YES	0.620496
SeD_A0721_YP_002214610.1_-_721246-722775	0.00539799	YES	0.524088
SeD_A0739_YP_002214626.1_-_735815-737026	0.0824484	YES	0.586977
SeD_A0762_YP_002214646.1_+_758441-759913	0.00901779	YES	0.52709
SeD_A0763_YP_002214647.1_-_759935-761614	0.016679	YES	0.533421
SeD_A0773_YP_002214656.1_-_770007-770156	0.177593	YES	0.664037
SeD_A0775_YP_002214658.1_-_770638-771684	0.0633621	YES	0.571533
SeD_A0788_YP_002214664.1_-_779095-780315	0.0832938	YES	0.587661
SeD_A0795_YP_002214669.1_+_788609-788941	0.0280318	YES	0.542755
SeD_A0799_YP_002214673.1_-_792972-793898	0.00279498	YES	0.521926
SeD_A0802_YP_002214677.1_+_795720-795842	0.356335	YES	0.806777
SeD_A0805_YP_002214679.1_+_796810-797352	0.0993544	YES	0.600635
SeD_A0831_YP_002214705.1_+_829494-830702	0.0203601	YES	0.536453
SeD_A0835_YP_002214709.1_+_833120-833245	0.125233	YES	0.621548
SeD_A0846_YP_002214720.1_+_842588-843376	0.252882	YES	0.725376
SeD_A0854_YP_002214724.1_-_847250-847636	0.364022	YES	0.812502
SeD_A0873_YP_002214743.1_-_867080-868555	0.0193371	YES	0.535611
SeD_A0881_YP_002214751.1_-_874501-875784	0.250807	YES	0.723692
SeD_A0894_YP_002214764.1_+_891125-893392	0.537119	YES	0.919273
SeD_A0895_YP_002214765.1_-_893484-894392	0.0539709	YES	0.563914
SeD_A0919_YP_002214786.1_-_914607-914867	0.141273	YES	0.634533
SeD_A0922_YP_002214790.1_-_916546-918768	0.360891	YES	0.810178
SeD_A0927_YP_002214795.1_-_922278-922409	0.018885	YES	0.535239
SeD_A0954_YP_002214818.1_+_949001-949135	0.00968979	YES	0.527646
SeD_A0956_YP_002214820.1_+_950301-950816	0.0126248	YES	0.530074
SeD_A0958_YP_002214822.1_+_951599-952552	0.0749115	YES	0.580884
SeD_A0962_YP_002214825.1_-_956148-957038	0.0215496	YES	0.537432
SeD_A1010_YP_002214870.1_+_1003115-1003258	0.0714615	YES	0.578092
SeD_A1016_YP_002214875.1_-_1007742-1008419	0.132309	YES	0.627274
SeD_A1024_YP_002214883.1_+_1016805-1017299	0.0406166	YES	0.553046
SeD_A1027_YP_002214886.1_+_1022163-1023506	0.0866486	YES	0.590371
SeD_A1035_YP_002214894.1_+_1033586-1033735	0.10891	YES	0.608354
SeD_A1043_YP_002214901.1_-_1042495-1042608	0.356666	YES	0.807026
SeD_A1045_YP_002214904.1_+_1044967-1045650	0.0138039	YES	0.531048
SeD_A1056_YP_002214915.1_+_1057379-1058182	0.0524798	YES	0.562703
SeD_A1060_YP_002214919.1_+_1064981-1066831	0.114514	YES	0.612882
SeD_A1065_YP_002214924.1_+_1071155-1071271	0.11111	YES	0.610131
SeD_A1075_YP_002214934.1_-_1079524-1079772	0.0162606	YES	0.533076
SeD_A1077_YP_002214936.1_-_1080095-1080571	0.0288983	YES	0.543466
SeD_A1105_YP_002214964.1_+_1102789-1103820	0.0869293	YES	0.590598
SeD_A1107_YP_002214966.1_+_1104383-1104808	0.0176577	YES	0.534228
SeD_A1110_YP_002214969.1_+_1106163-1107557	0.223964	YES	0.701845
SeD_A1113_YP_002214973.1_+_1108709-1110763	0.0660688	YES	0.573726
SeD_A1116_YP_002214975.1_+_1111318-1111479	0.0303232	YES	0.544633
SeD_A1120_YP_002214979.1_+_1113513-1113845	0.0721366	YES	0.578639
SeD_A1121_YP_002214980.1_+_1113842-1115068	0.0414918	YES	0.55376
SeD_A1124_YP_002214983.1_+_1117384-1117965	0.201499	YES	0.683521
SeD_A1128_YP_002214987.1_+_1120667-1120816	0.318079	YES	0.77747
SeD_A1130_YP_002214988.1_-_1121045-1121731	0.306917	YES	0.768705
SeD_A1141_YP_002214999.1_-_1135819-1135956	0.20228	YES	0.684158
SeD_A1152_YP_002215010.1_-_1147556-1148218	0.0681947	YES	0.575448
SeD_A1156_YP_002215013.1_+_1150651-1151199	0.0606839	YES	0.569362
SeD_A1157_YP_002215014.1_+_1151216-1152004	0.106243	YES	0.606199
SeD_A1165_YP_002215021.1_+_1156082-1156360	0.0280477	YES	0.542768
SeD_A1167_YP_002215023.1_-_1156728-1158413	0.145626	YES	0.638062
SeD_A1174_YP_002215030.1_-_1164223-1165785	0.098225	YES	0.599723
SeD_A1177_YP_002215033.1_+_1168005-1169471	0.0301643	YES	0.544503
SeD_A1180_YP_002215036.1_+_1170858-1171661	0.0726039	YES	0.579017
SeD_A1188_YP_002215044.1_+_1178655-1179017	0.0185749	YES	0.534984
SeD_A1195_YP_002215051.1_+_1184704-1184871	0.48491	YES	0.892216
SeD_A1213_YP_002215065.1_-_1204294-1204428	0.0334099	YES	0.54716
SeD_A1225_YP_002215077.1_-_1219103-1220389	0.00194128	YES	0.521216
SeD_A1226_YP_002215078.1_-_1220414-1221502	0.213303	YES	0.693151
SeD_A1229_YP_002215081.1_-_1223737-1225209	0.0866086	YES	0.590339
SeD_A1231_YP_002215083.1_-_1225500-1226003	0.218865	YES	0.697687
SeD_A1241_YP_002215090.1_-_1237409-1238188	0.197284	YES	0.680083
SeD_A1264_YP_002215108.1_-_1253793-1254170	0.00255621	YES	0.521727
SeD_A1268_YP_002215112.1_-_1256161-1257378	0.0211832	YES	0.537131
SeD_A1272_YP_002215116.1_-_1259910-1260905	0.136051	YES	0.630303
SeD_A1275_YP_002215119.1_+_1262788-1263102	0.00488914	YES	0.523666
SeD_A1281_YP_002215125.1_-_1267503-1267871	0.0493998	YES	0.560199
SeD_A1284_YP_002215127.1_-_1268293-1269699	0.521219	YES	0.91155
SeD_A1283_YP_002215128.1_+_1269698-1269937	0.408322	YES	0.844155
SeD_A1285_YP_002215129.1_+_1269955-1271472	0.682222	YES	0.969532
SeD_A1292_YP_002215135.1_+_1277055-1277807	0.0287283	YES	0.543326
SeD_A1294_YP_002215137.1_-_1278829-1279053	0.177243	YES	0.663752
SeD_A1295_YP_002215138.1_-_1279050-1279205	0.10404	YES	0.60442
SeD_A1326_YP_002215164.1_+_1302004-1303665	0.120111	YES	0.617406
SeD_A1354_YP_002215192.1_+_1329303-1330313	0.00618346	YES	0.52474
SeD_A1360_YP_002215198.1_-_1335448-1336890	0.139788	YES	0.633331
SeD_A1361_YP_002215199.1_-_1337014-1337883	0.0132535	YES	0.530594
SeD_A1373_YP_002215211.1_-_1349085-1349315	0.00358065	YES	0.522579
SeD_A1374_YP_002215212.1_+_1349453-1349827	0.0830131	YES	0.587434
SeD_A1381_YP_002215217.1_-_1353376-1353561	0.0618761	YES	0.570329
SeD_A1382_YP_002215218.1_-_1353608-1354438	0.0826933	YES	0.587175
SeD_A1384_YP_002215220.1_-_1357262-1357597	0.076593	YES	0.582243
SeD_A1387_YP_002215223.1_-_1359176-1359373	0.252791	YES	0.725302
SeD_A1393_YP_002215229.1_-_1366265-1366390	0.10975	YES	0.609032
SeD_A1397_YP_002215233.1_+_1368062-1368709	0.0335263	YES	0.547255
SeD_A1399_YP_002215235.1_+_1369591-1369707	0.0553526	YES	0.565037
SeD_A1404_YP_002215240.1_+_1372946-1373479	0.136899	YES	0.63099
SeD_A1416_YP_002215252.1_+_1382489-1385575	0.0310439	YES	0.545223
SeD_A1426_YP_002215259.1_+_1392747-1392989	0.200032	YES	0.682324
SeD_A1428_YP_002215261.1_+_1395460-1396029	0.232655	YES	0.708929
SeD_A1429_YP_002215262.1_-_1396231-1396953	0.332873	YES	0.788951
SeD_A1431_YP_002215263.1_-_1397433-1398233	0.230797	YES	0.707415
SeD_A1433_YP_002215265.1_-_1400263-1401210	0.13546	YES	0.629825
SeD_A1437_YP_002215269.1_-_1402474-1402641	0.0478875	YES	0.558969
SeD_A1438_YP_002215270.1_-_1402706-1402897	0.239708	YES	0.714671
SeD_A1439_YP_002215271.1_+_1402952-1403215	0.159026	YES	0.648937
SeD_A1452_YP_002215279.1_+_1411972-1412166	0.125408	YES	0.621689
SeD_A1457_YP_002215283.1_+_1414970-1415692	0.384411	YES	0.82737
SeD_A1489_YP_002215312.1_-_1441225-1442607	0.0179052	YES	0.534432
SeD_A1503_YP_002215326.1_-_1454913-1455620	0.00209532	YES	0.521344
SeD_A1508_YP_002215331.1_-_1457839-1457955	0.183286	YES	0.668673
SeD_A1542_YP_002215364.1_+_1490911-1491081	0.0790322	YES	0.584216
SeD_A1572_YP_002215387.1_-_1516198-1517040	0.017319	YES	0.533949
SeD_A1581_YP_002215396.1_+_1527368-1528999	0.117594	YES	0.615371
SeD_A1584_YP_002215399.1_+_1530976-1531983	0.0202558	YES	0.536368
SeD_A1599_YP_002215413.1_-_1542274-1542777	0.0476968	YES	0.558814
SeD_A1600_YP_002215414.1_-_1542867-1543049	0.292303	YES	0.757114
SeD_A1615_YP_002215428.1_+_1559226-1560200	0.0653874	YES	0.573174
SeD_A1617_YP_002215430.1_+_1560631-1560792	0.133306	YES	0.628081
SeD_A1633_YP_002215445.1_-_1576862-1577041	0.130125	YES	0.625506
SeD_A1634_YP_002215446.1_+_1577472-1578449	0.146725	YES	0.638953
SeD_A1642_YP_002215454.1_+_1586190-1586858	0.0418027	YES	0.554013
SeD_A1650_YP_002215462.1_-_1592515-1593021	0.0859127	YES	0.589777
SeD_A1661_YP_002215473.1_-_1603355-1604206	0.0381449	YES	0.551029
SeD_A1662_YP_002215474.1_+_1604506-1605351	0.0937985	YES	0.596147
SeD_A1663_YP_002215475.1_+_1605426-1607408	0.00875176	YES	0.526869
SeD_A1664_YP_002215476.1_+_1607435-1608259	0.106105	YES	0.606088
SeD_A1680_YP_002215491.1_+_1618946-1620319	0.0964114	YES	0.598258
SeD_A1681_YP_002215492.1_-_1620363-1621298	0.114622	YES	0.612969
SeD_A1683_YP_002215494.1_+_1621509-1621661	0.118012	YES	0.615709
SeD_A1685_YP_002215496.1_-_1622042-1622476	0.0149321	YES	0.53198
SeD_A1710_YP_002215516.1_-_1646088-1647314	0.0246757	YES	0.540001
SeD_A1716_YP_002215521.1_+_1651102-1652727	0.00818452	YES	0.5264
SeD_A1721_YP_002215526.1_+_1658984-1659550	0.134924	YES	0.629391
SeD_A1722_YP_002215527.1_+_1659562-1660698	0.129552	YES	0.625043
SeD_A1753_YP_002215558.1_+_1691780-1692445	0.052429	YES	0.562662
SeD_A1754_YP_002215559.1_-_1692501-1694666	0.211322	YES	0.691534
SeD_A1778_YP_002215581.1_-_1722891-1723034	0.101118	YES	0.602059
SeD_A1807_YP_002215610.1_+_1753573-1754100	0.00441891	YES	0.523276
SeD_A1816_YP_002215618.1_+_1761776-1762159	0.0406521	YES	0.553075
SeD_A1824_YP_002215624.1_-_1766996-1767178	0.33373	YES	0.789611
SeD_A1827_YP_002215627.1_+_1769427-1770113	0.0388799	YES	0.551629
SeD_A1836_YP_002215634.1_+_1776452-1776793	0.106064	YES	0.606054
SeD_A1839_YP_002215637.1_+_1778247-1778552	0.156727	YES	0.64707
SeD_A1846_YP_002215644.1_+_1786869-1787771	0.0377515	YES	0.550708
SeD_A1848_YP_002215646.1_+_1788428-1789576	0.06248	YES	0.570818
SeD_A1850_YP_002215648.1_-_1790957-1791652	0.00203294	YES	0.521292
SeD_A1852_YP_002215650.1_-_1793126-1794025	0.00450584	YES	0.523348
SeD_A1853_YP_002215651.1_+_1794145-1795398	0.0797086	YES	0.584763
SeD_A1854_YP_002215652.1_+_1795793-1796041	0.627386	YES	0.954611
SeD_A1859_YP_002215657.1_-_1797961-1798098	0.233259	YES	0.70942
SeD_A1874_YP_002215668.1_-_1812717-1814120	0.0751392	YES	0.581068
SeD_A1889_YP_002215682.1_+_1828849-1829484	0.0207447	YES	0.53677
SeD_A1898_YP_002215689.1_+_1837206-1837673	0.0193395	YES	0.535613
SeD_A1911_YP_002215702.1_+_1847106-1847927	0.665462	YES	0.965447
SeD_A1913_YP_002215704.1_+_1849103-1850128	0.0344963	YES	0.548048
SeD_A1931_YP_002215720.1_-_1864803-1865795	0.146017	YES	0.638379
SeD_A1935_YP_002215723.1_-_1867768-1868031	0.210723	YES	0.691046
SeD_A1937_YP_002215725.1_-_1868296-1868511	0.214676	YES	0.69427
SeD_A1938_YP_002215726.1_-_1868605-1869294	0.0981977	YES	0.599701
SeD_A1939_YP_002215727.1_-_1869291-1870073	0.151219	YES	0.642598
SeD_A1943_YP_002215731.1_-_1871597-1873051	0.409124	YES	0.844704
SeD_A1945_YP_002215733.1_-_1873524-1874114	0.0701627	YES	0.577041
SeD_A1949_YP_002215737.1_+_1878389-1881151	0.0599731	YES	0.568786
SeD_A1965_YP_002215750.1_+_1898396-1898632	0.124515	YES	0.620967
SeD_A1966_YP_002215751.1_+_1898715-1898957	0.240563	YES	0.715367
SeD_A1971_YP_002215756.1_-_1903071-1903817	0.0243196	YES	0.539709
SeD_A1995_YP_002215777.1_-_1927490-1929868	0.02106	YES	0.537029
SeD_A1999_YP_002215780.1_+_1932397-1932588	0.0918352	YES	0.594561
SeD_A2008_YP_002215789.1_-_1940977-1941960	0.045267	YES	0.556836
SeD_A2014_YP_002215795.1_-_1948242-1949096	0.0932586	YES	0.595711
SeD_A2016_YP_002215796.1_+_1949549-1950508	0.13077	YES	0.626028
SeD_A2026_YP_002215806.1_+_1958261-1960513	0.446202	YES	0.869092
SeD_A2035_YP_002215814.1_-_1966594-1966728	0.0034685	YES	0.522486
SeD_A2037_YP_002215817.1_-_1968585-1969070	0.151447	YES	0.642784
SeD_A2072_YP_002215851.1_+_2005282-2006568	0.153838	YES	0.644724
SeD_A2080_YP_002215858.1_-_2012051-2012188	0.0898312	YES	0.592943
SeD_A2094_YP_002215871.1_+_2017510-2017698	0.110929	YES	0.609985
SeD_A2115_YP_002215888.1_+_2031796-2031969	0.0927131	YES	0.595271
SeD_A2120_YP_002215891.1_-_2034170-2034727	0.0560818	YES	0.565628
SeD_A2123_YP_002215894.1_+_2036561-2037082	0.161272	YES	0.650762
SeD_A2152_YP_002215921.1_-_2064496-2064654	0.00837674	YES	0.526559
SeD_A2155_YP_002215924.1_-_2069316-2069573	0.073323	YES	0.579598
SeD_A2162_YP_002215931.1_-_2075209-2075847	0.0496178	YES	0.560377
SeD_A2188_YP_002215953.1_-_2098901-2099854	0.211828	YES	0.691947
SeD_A2189_YP_002215954.1_-_2099869-2101530	0.168821	YES	0.656898
SeD_A2193_YP_002215958.1_-_2104407-2105189	0.326311	YES	0.78388
SeD_A2194_YP_002215959.1_-_2105203-2105958	0.0622257	YES	0.570612
SeD_A2195_YP_002215960.1_-_2105979-2107190	0.0595981	YES	0.568482
SeD_A2196_YP_002215961.1_-_2107217-2107915	0.358192	YES	0.808166
SeD_A2197_YP_002215962.1_-_2107927-2108331	0.00476727	YES	0.523565
SeD_A2198_YP_002215963.1_-_2108335-2108751	0.0429743	YES	0.554968
SeD_A2200_YP_002215965.1_+_2109659-2109952	0.45015	YES	0.871565
SeD_A2201_YP_002215966.1_+_2109987-2110379	0.0264426	YES	0.541452
SeD_A2204_YP_002215969.1_-_2113225-2113872	0.0339013	YES	0.547562
SeD_A2216_YP_002215981.1_+_2121564-2122139	0.0285669	YES	0.543194
SeD_A2223_YP_002215988.1_-_2129046-2130599	0.0205686	YES	0.536625
SeD_A2227_YP_002215992.1_-_2134073-2134393	0.0307168	YES	0.544955
SeD_A2228_YP_002215993.1_-_2134524-2134850	0.289736	YES	0.755066
SeD_A2229_YP_002215994.1_-_2134912-2135367	0.108883	YES	0.608332
SeD_A2234_YP_002215999.1_+_2138139-2138972	0.0403903	YES	0.552861
SeD_A2246_YP_002216009.1_+_2147528-2148535	0.0921967	YES	0.594853
SeD_A2265_YP_002216027.1_-_2162093-2162293	0.187722	YES	0.672287
SeD_A2274_YP_002216034.1_-_2168456-2168755	0.174118	YES	0.661208
SeD_A2288_YP_002216048.1_-_2178582-2178806	0.0296203	YES	0.544057
SeD_A2292_YP_002216052.1_+_2181160-2181516	0.101253	YES	0.602169
SeD_A2294_YP_002216053.1_+_2181574-2182401	0.00797018	YES	0.526222
SeD_A2306_YP_002216063.1_-_2189726-2189977	0.701181	YES	0.973686
SeD_A2307_YP_002216064.1_-_2190456-2190953	0.0807982	YES	0.585643
SeD_A2308_YP_002216065.1_-_2191315-2191878	0.132969	YES	0.627807
SeD_A2309_YP_002216066.1_-_2191945-2192058	0.224361	YES	0.702169
SeD_A2310_YP_002216067.1_+_2192289-2193170	0.591177	YES	0.942139
SeD_A2320_YP_002216076.1_+_2202080-2202247	0.160101	YES	0.64981
SeD_A2326_YP_002216081.1_+_2207105-2207839	0.13957	YES	0.633153
SeD_A2328_YP_002216083.1_+_2209041-2209223	0.00529863	YES	0.524006
SeD_A2331_YP_002216086.1_-_2210817-2212088	0.0177476	YES	0.534302
SeD_A2336_YP_002216090.1_+_2214834-2215358	0.306441	YES	0.768329
SeD_A2337_YP_002216091.1_-_2215407-2215532	0.0806384	YES	0.585514
SeD_A2339_YP_002216092.1_+_2216872-2219040	0.241621	YES	0.716227
SeD_A2340_YP_002216093.1_+_2219097-2220827	0.0994967	YES	0.60075
SeD_A2341_YP_002216094.1_+_2220858-2220992	0.0261604	YES	0.54122
SeD_A2378_YP_002216127.1_+_2250745-2251266	0.267688	YES	0.73736
SeD_A2383_YP_002216132.1_+_2254228-2254860	0.123398	YES	0.620063
SeD_A2385_YP_002216134.1_+_2255352-2255627	0.0188827	YES	0.535237
SeD_A2386_YP_002216135.1_+_2255637-2256647	0.0318745	YES	0.545903
SeD_A2387_YP_002216136.1_+_2256644-2258038	0.103115	YES	0.603672
SeD_A2401_YP_002216150.1_-_2269096-2271372	0.0166143	YES	0.533368
SeD_A2402_YP_002216151.1_+_2271991-2274339	0.502739	YES	0.902002
SeD_A2410_YP_002216158.1_+_2281061-2282365	0.0049816	YES	0.523743
SeD_A2426_YP_002216174.1_-_2298318-2299319	0.0387128	YES	0.551493
SeD_A2430_YP_002216178.1_-_2302578-2303891	0.156357	YES	0.64677
SeD_A2445_YP_002216192.1_-_2320123-2321559	0.0502911	YES	0.560924
SeD_A2453_YP_002216200.1_-_2327889-2329106	0.0394549	YES	0.552098
SeD_A2456_YP_002216203.1_-_2330523-2332682	0.0573711	YES	0.566675
SeD_A2464_YP_002216210.1_-_2339898-2340068	0.0972775	YES	0.598957
SeD_A2489_YP_002216228.1_-_2370209-2370955	0.042037	YES	0.554204
SeD_A2499_YP_002216237.1_-_2378450-2378731	0.10521	YES	0.605365
SeD_A2514_YP_002216252.1_-_2396070-2396978	0.196379	YES	0.679345
SeD_A2518_YP_002216256.1_-_2399374-2400810	0.0844168	YES	0.588568
SeD_A2519_YP_002216257.1_-_2400861-2400998	0.0644737	YES	0.572434
SeD_A2548_YP_002216281.1_-_2427075-2429027	0.0774469	YES	0.582934
SeD_A2557_YP_002216290.1_+_2437901-2438032	0.257101	YES	0.728797
SeD_A2570_YP_002216303.1_+_2450729-2452318	0.117251	YES	0.615094
SeD_A2578_YP_002216311.1_+_2459235-2459462	0.362331	YES	0.811248
SeD_A2659_YP_002216383.1_-_2542837-2544618	0.022897	YES	0.53854
SeD_A2675_YP_002216399.1_-_2561046-2561198	0.0356732	YES	0.54901
SeD_A2680_YP_002216402.1_+_2564466-2565065	0.0383738	YES	0.551216
SeD_A2685_YP_002216407.1_+_2568931-2569065	0.0043623	YES	0.523228
SeD_A2687_YP_002216409.1_+_2570381-2572525	0.15742	YES	0.647632
SeD_A2692_YP_002216414.1_-_2577497-2577769	0.117654	YES	0.615419
SeD_A2693_YP_002216416.1_+_2578292-2578465	0.0479556	YES	0.559025
SeD_A2722_YP_002216444.1_+_2604758-2605759	0.227124	YES	0.704421
SeD_A2740_YP_002216458.1_+_2618437-2618577	0.0466518	YES	0.557964
SeD_A2745_YP_002216462.1_+_2623560-2624867	0.148773	YES	0.640614
SeD_A2763_YP_002216475.1_+_2641735-2641857	0.363001	YES	0.811745
SeD_A2777_YP_002216485.1_+_2655510-2655857	0.215742	YES	0.69514
SeD_A2789_YP_002216493.1_-_2663014-2663940	0.0979496	YES	0.5995
SeD_A2796_YP_002216500.1_-_2670565-2670690	0.112286	YES	0.611082
SeD_A2797_YP_002216501.1_+_2670830-2671087	0.021972	YES	0.53778
SeD_A2802_YP_002216506.1_+_2674748-2676040	0.0988356	YES	0.600216
SeD_A2838_YP_002216539.1_-_2705511-2707790	0.00460496	YES	0.52343
SeD_A2841_YP_002216542.1_-_2711095-2711325	0.0946751	YES	0.596855
SeD_A2846_YP_002216547.1_+_2717294-2718994	0.0729862	YES	0.579326
SeD_A2847_YP_002216548.1_+_2719179-2722292	0.040679	YES	0.553097
SeD_A2854_YP_002216555.1_-_2728524-2729558	0.0239434	YES	0.5394
SeD_A2871_YP_002216572.1_+_2745905-2747485	0.129108	YES	0.624683
SeD_A2877_YP_002216577.1_+_2755166-2756515	0.0616974	YES	0.570184
SeD_A2885_YP_002216581.1_-_2776287-2778479	0.245112	YES	0.719066
SeD_A2893_YP_002216587.1_-_2785077-2786081	0.166874	YES	0.655315
SeD_A2918_YP_002216609.1_+_2810410-2810529	0.0870884	YES	0.590727
SeD_A2932_YP_002216623.1_+_2822800-2823990	0.0247362	YES	0.540051
SeD_A2933_YP_002216624.1_+_2824172-2825716	0.0297614	YES	0.544173
SeD_A2943_YP_002216632.1_-_2835795-2839682	0.0611672	YES	0.569754
SeD_A2944_YP_002216633.1_+_2839796-2839933	0.0339287	YES	0.547584
SeD_A2962_YP_002216650.1_-_2854313-2856112	0.0565149	YES	0.56598
SeD_A2967_YP_002216655.1_-_2859214-2859393	0.0369676	YES	0.550068
SeD_A2970_YP_002216657.1_+_2861757-2861876	0.125142	YES	0.621475
SeD_A2971_YP_002216658.1_+_2861952-2863286	0.0390219	YES	0.551745
SeD_A2976_YP_002216663.1_-_2866462-2867499	0.0648144	YES	0.57271
SeD_A2989_YP_002216671.1_-_2881064-2883637	0.0418791	YES	0.554076
SeD_A2993_YP_002216675.1_+_2886616-2886954	0.198298	YES	0.68091
SeD_A3010_YP_002216690.1_-_2900475-2901227	0.097388	YES	0.599047
SeD_A3018_YP_002216699.1_+_2917754-2919163	0.0156939	YES	0.532608
SeD_A3027_YP_002216704.1_-_2924924-2927731	0.088906	YES	0.592195
SeD_A3038_YP_002216714.1_+_2934778-2935644	0.0178518	YES	0.534388
SeD_A3039_YP_002216715.1_-_2935671-2936117	0.110076	YES	0.609296
SeD_A3048_YP_002216724.1_-_2939570-2940628	0.0190848	YES	0.535404
SeD_A3051_YP_002216727.1_+_2943387-2944418	0.0332509	YES	0.54703
SeD_A3057_YP_002216733.1_-_2948481-2950877	0.0323949	YES	0.546329
SeD_A3059_YP_002216735.1_-_2951728-2951955	0.0703309	YES	0.577177
SeD_A3060_YP_002216736.1_-_2951955-2952188	0.0266628	YES	0.541632
SeD_A3061_YP_002216737.1_-_2952256-2952597	0.0058087	YES	0.524429
SeD_A3064_YP_002216739.1_-_2954010-2954249	0.0385136	YES	0.55133
SeD_A3070_YP_002216745.1_+_2960332-2960448	0.190592	YES	0.674627
SeD_A3075_YP_002216750.1_-_2968283-2970457	0.149916	YES	0.641542
SeD_A3097_YP_002216767.1_-_2989813-2990262	0.0575758	YES	0.566841
SeD_A3110_YP_002216780.1_+_2996261-2996419	0.273958	YES	0.742414
SeD_A3114_YP_002216784.1_+_2999298-3000257	0.0462629	YES	0.557647
SeD_A3135_YP_002216797.1_-_3015339-3015524	0.0204563	YES	0.536533
SeD_A3183_YP_002216844.1_-_3060466-3060708	0.0886362	YES	0.591977
SeD_A3184_YP_002216845.1_-_3060733-3061797	0.105593	YES	0.605674
SeD_A3185_YP_002216846.1_+_3062227-3063156	0.201999	YES	0.683929
SeD_A3188_YP_002216849.1_-_3066468-3068075	0.366465	YES	0.814308
SeD_A3192_YP_002216853.1_-_3069076-3071088	0.31168	YES	0.772456
SeD_A3195_YP_002216854.1_-_3073511-3075292	0.00770105	YES	0.525999
SeD_A3202_YP_002216861.1_-_3079643-3080653	0.0392763	YES	0.551952
SeD_A3207_YP_002216866.1_-_3084879-3085997	0.520592	YES	0.911236
SeD_A3210_YP_002216869.1_+_3088785-3089228	0.213336	YES	0.693177
SeD_A3211_YP_002216870.1_+_3090089-3090370	0.29046	YES	0.755644
SeD_A3217_YP_002216875.1_-_3094049-3094171	0.107699	YES	0.607375
SeD_A3221_YP_002216879.1_+_3099087-3099998	0.0318511	YES	0.545884
SeD_A3228_YP_002216885.1_+_3106314-3107078	0.263507	YES	0.733982
SeD_A3234_YP_002216891.1_-_3111039-3112172	0.776375	YES	0.985938
SeD_A3237_YP_002216893.1_-_3112968-3113735	0.0320749	YES	0.546067
SeD_A3257_YP_002216911.1_+_3130122-3131204	0.285128	YES	0.751382
SeD_A3269_YP_002216923.1_+_3143498-3144085	0.0195206	YES	0.535762
SeD_A3275_YP_002216929.1_+_3149249-3150280	0.00170378	YES	0.521018
SeD_A3327_YP_002216973.1_+_3205628-3205771	0.0404476	YES	0.552908
SeD_A3332_YP_002216978.1_+_3210967-3211092	0.551432	YES	0.925836
SeD_A3362_YP_002217005.1_-_3235491-3236234	0.0480132	YES	0.559071
SeD_A3369_YP_002217012.1_-_3242605-3242832	0.127852	YES	0.623667
SeD_A3373_YP_002217015.1_-_3244663-3245415	0.122523	YES	0.619356
SeD_A3379_YP_002217020.1_-_3250776-3251489	0.0664206	YES	0.574011
SeD_A3398_YP_002217039.1_+_3268969-3269142	0.0434113	YES	0.555324
SeD_A3411_YP_002217047.1_-_3277785-3278948	0.0515486	YES	0.561946
SeD_A3429_YP_002217061.1_-_3295108-3295839	0.0241144	YES	0.53954
SeD_A3445_YP_002217077.1_+_3309290-3309580	0.0864815	YES	0.590236
SeD_A3458_YP_002217090.1_-_3319834-3321969	0.0192341	YES	0.535527
SeD_A3459_YP_002217091.1_+_3322242-3322355	0.261574	YES	0.732418
SeD_A3468_YP_002217099.1_+_3331088-3331834	0.139539	YES	0.633129
SeD_A3483_YP_002217114.1_-_3347679-3348737	0.12549	YES	0.621756
SeD_A3485_YP_002217116.1_+_3349099-3349296	0.163746	YES	0.652772
SeD_A3499_YP_002217128.1_-_3360821-3361006	0.100401	YES	0.60148
SeD_A3504_YP_002217133.1_+_3364706-3365116	0.212699	YES	0.692657
SeD_A3513_YP_002217141.1_-_3370985-3371101	0.0248511	YES	0.540145
SeD_A3520_YP_002217147.1_+_3378649-3379632	0.0151913	YES	0.532194
SeD_A3530_YP_002217157.1_+_3389849-3389965	0.0448237	YES	0.556475
SeD_A3539_YP_002217166.1_+_3395625-3397094	0.0355341	YES	0.548896
SeD_A3558_YP_002217183.1_-_3414051-3415352	0.023567	YES	0.539091
SeD_A3567_YP_002217192.1_+_3423448-3425295	0.0868556	YES	0.590539
SeD_A3585_YP_002217209.1_+_3443435-3443803	0.136554	YES	0.630711
SeD_A3598_YP_002217220.1_-_3452053-3453417	0.203599	YES	0.685234
SeD_A3609_YP_002217229.1_+_3464806-3464925	0.156613	YES	0.646977
SeD_A3621_YP_002217240.1_+_3476871-3477461	0.0682239	YES	0.575472
SeD_A3635_YP_002217254.1_-_3487312-3489201	0.0213608	YES	0.537277
SeD_A3645_YP_002217261.1_-_3498970-3499422	0.00708028	YES	0.525484
SeD_A3648_YP_002217263.1_+_3501551-3502510	0.0915106	YES	0.594299
SeD_A3650_YP_002217264.1_-_3502695-3503027	0.0351707	YES	0.548599
SeD_A3658_YP_002217272.1_+_3509497-3510930	0.0295539	YES	0.544003
SeD_A3664_YP_002217276.1_+_3514039-3515151	0.0511903	YES	0.561655
SeD_A3672_YP_002217284.1_-_3519780-3520592	0.0623554	YES	0.570717
SeD_A3679_YP_002217291.1_+_3525244-3526677	0.144945	YES	0.63751
SeD_A3708_YP_002217317.1_+_3556250-3557617	0.141111	YES	0.634402
SeD_A3718_YP_002217327.1_-_3566746-3567375	0.0403319	YES	0.552814
SeD_A3720_YP_002217329.1_+_3568848-3569318	0.157516	YES	0.64771
SeD_A3721_YP_002217330.1_+_3569683-3569946	0.0192956	YES	0.535577
SeD_A3722_YP_002217331.1_+_3570050-3570316	0.00316177	YES	0.522231
SeD_A3734_YP_002217343.1_-_3584339-3585382	0.0234277	YES	0.538976
SeD_A3739_YP_002217348.1_+_3590918-3591388	0.0486673	YES	0.559604
SeD_A3754_YP_002217361.1_+_3603092-3606205	0.00456168	YES	0.523394
SeD_A3756_YP_002217362.1_-_3606303-3606467	0.360362	YES	0.809785
SeD_A3788_YP_002217383.1_-_3628165-3628599	0.037126	YES	0.550197
SeD_A3796_YP_002217391.1_-_3631513-3631827	0.148352	YES	0.640272
SeD_A3799_YP_002217394.1_-_3632627-3632818	0.0597344	YES	0.568592
SeD_A3802_YP_002217397.1_-_3633960-3634292	0.0354929	YES	0.548863
SeD_A3806_YP_002217401.1_-_3635740-3636345	0.0149038	YES	0.531956
SeD_A3814_YP_002217408.1_-_3640357-3642471	0.0631355	YES	0.57135
SeD_A3822_YP_002217416.1_+_3646707-3646925	0.267977	YES	0.737593
SeD_A3833_YP_002217426.1_-_3655731-3656135	0.0147274	YES	0.531811
SeD_A3840_YP_002217433.1_-_3662020-3662592	0.0815812	YES	0.586276
SeD_A3843_YP_002217435.1_-_3664184-3664360	0.0801994	YES	0.585159
SeD_A3847_YP_002217440.1_+_3669907-3675678	0.237717	YES	0.71305
SeD_A3875_YP_002217465.1_+_3704080-3706398	0.0213177	YES	0.537241
SeD_A3884_YP_002217474.1_-_3713869-3716262	0.0823042	YES	0.586861
SeD_A3885_YP_002217475.1_+_3716856-3719564	0.117897	YES	0.615616
SeD_A3893_YP_002217481.1_-_3726199-3726957	0.146062	YES	0.638415
SeD_A3917_YP_002217504.1_-_3755939-3756055	0.0282882	YES	0.542965
SeD_A3918_YP_002217505.1_+_3756123-3757337	0.0749184	YES	0.580889
SeD_A3923_YP_002217510.1_+_3762083-3762499	0.166192	YES	0.65476
SeD_A3937_YP_002217524.1_+_3774062-3774196	0.167616	YES	0.655919
SeD_A3942_YP_002217529.1_-_3778524-3779999	0.092338	YES	0.594968
SeD_A3947_YP_002217534.1_-_3782206-3782364	0.184102	YES	0.669337
SeD_A3961_YP_002217546.1_+_3796627-3796758	0.112351	YES	0.611134
SeD_A3973_YP_002217558.1_-_3809767-3810810	0.0392809	YES	0.551956
SeD_A3979_YP_002217564.1_-_3817011-3818600	0.0610159	YES	0.569631
SeD_A3982_YP_002217567.1_+_3820473-3821375	0.0139717	YES	0.531187
SeD_A3983_YP_002217568.1_+_3821448-3822476	0.0179415	YES	0.534462
SeD_A3994_YP_002217578.1_-_3838306-3840606	0.149189	YES	0.640951
SeD_A3998_YP_002217582.1_+_3844305-3844418	0.173667	YES	0.660841
SeD_A3999_YP_002217583.1_+_3844451-3846010	0.117197	YES	0.61505
SeD_A4014_YP_002217596.1_+_3859017-3860024	0.0132184	YES	0.530565
SeD_A4018_YP_002217598.1_-_3862414-3862941	0.0698311	YES	0.576773
SeD_A4022_YP_002217599.1_-_3866594-3867292	0.15468	YES	0.645408
SeD_A4023_YP_002217600.1_-_3867377-3867901	0.105453	YES	0.605561
SeD_A4034_YP_002217611.1_+_3876743-3877282	0.161593	YES	0.651023
SeD_A4046_YP_002217622.1_-_3889639-3890562	0.0645133	YES	0.572466
SeD_A4047_YP_002217623.1_-_3890593-3890727	0.241971	YES	0.716512
SeD_A4051_YP_002217627.1_-_3894857-3895657	0.0614945	YES	0.57002
SeD_A4058_YP_002217634.1_+_3900221-3901207	0.165585	YES	0.654267
SeD_A4065_YP_002217641.1_-_3908221-3909759	0.170912	YES	0.6586
SeD_A4087_YP_002217663.1_-_3935935-3936402	0.103213	YES	0.603752
SeD_A4091_YP_002217667.1_+_3939017-3940300	0.0391374	YES	0.551839
SeD_A4103_YP_002217677.1_-_3951464-3952162	0.034234	YES	0.547834
SeD_A4104_YP_002217678.1_-_3952185-3953198	0.171744	YES	0.659276
SeD_A4107_YP_002217681.1_-_3955384-3955593	0.0804465	YES	0.585359
SeD_A4110_YP_002217684.1_-_3957560-3958630	0.00752227	YES	0.525851
SeD_A4124_YP_002217697.1_+_3969111-3969992	0.0170218	YES	0.533704
SeD_A4153_YP_002217716.1_+_3998712-3999392	0.101699	YES	0.602529
SeD_A4161_YP_002217724.1_-_4007356-4008465	0.00761775	YES	0.52593
SeD_A4174_YP_002217733.1_+_4017806-4018129	0.152829	YES	0.643905
SeD_A4193_YP_002217753.1_+_4040109-4040222	0.170316	YES	0.658115
SeD_A4217_YP_002217775.1_-_4059443-4059559	0.112779	YES	0.61148
SeD_A4216_YP_002217776.1_+_4059546-4062233	0.282966	YES	0.749651
SeD_A4230_YP_002217788.1_-_4076670-4078070	0.0877159	YES	0.591234
SeD_A4233_YP_002217791.1_+_4079471-4081117	0.193128	YES	0.676694
SeD_A4236_YP_002217794.1_+_4083961-4084920	0.00890798	YES	0.526999
SeD_A4242_YP_002217800.1_-_4089300-4090109	0.103775	YES	0.604206
SeD_A4269_YP_002217825.1_+_4113864-4114856	0.0246025	YES	0.539941
SeD_A4278_YP_002217834.1_+_4125119-4126117	0.144015	YES	0.636756
SeD_A4290_YP_002217839.1_-_4135457-4136977	0.126811	YES	0.622824
SeD_A4292_YP_002217841.1_+_4139210-4139473	0.097741	YES	0.599332
SeD_A4295_YP_002217844.1_+_4142433-4143977	0.0912851	YES	0.594117
SeD_A4297_YP_002217846.1_+_4144574-4144915	0.00687377	YES	0.525313
SeD_A4302_YP_002217851.1_-_4150420-4151901	0.209977	YES	0.690437
SeD_A4325_YP_002217869.1_-_4171729-4172898	0.106585	YES	0.606475
SeD_A4333_YP_002217875.1_+_4179075-4179278	0.283087	YES	0.749748
SeD_A4350_YP_002217891.1_-_4195617-4196570	0.0519209	YES	0.562249
SeD_A4392_YP_002217924.1_+_4237418-4237933	0.161698	YES	0.651108
SeD_A4395_YP_002217927.1_-_4241226-4242275	0.00463091	YES	0.523452
SeD_A4407_YP_002217938.1_-_4255615-4257651	0.0523087	YES	0.562564
SeD_A4417_YP_002217948.1_+_4265161-4265598	0.0119644	YES	0.529528
SeD_A4431_YP_002217960.1_-_4276057-4277088	0.265494	YES	0.735588
SeD_A4432_YP_002217961.1_+_4277136-4277270	0.0752596	YES	0.581165
SeD_A4433_YP_002217962.1_+_4277271-4278371	0.376812	YES	0.821885
SeD_A4447_YP_002217976.1_+_4289055-4289168	0.000804958	YES	0.52027
SeD_A4458_YP_002217987.1_+_4297547-4298047	0.130306	YES	0.625652
SeD_A4473_YP_002217998.1_-_4310331-4310474	0.366188	YES	0.814104
SeD_A4472_YP_002217999.1_+_4310460-4311995	0.0355647	YES	0.548921
SeD_A4481_YP_002218007.1_-_4318104-4318700	0.116666	YES	0.614621
SeD_A4487_YP_002218013.1_+_4324073-4324312	0.250163	YES	0.723169
SeD_A4493_YP_002218019.1_-_4328071-4329045	0.02209	YES	0.537877
SeD_A4494_YP_002218020.1_-_4329139-4330164	0.0017697	YES	0.521073
SeD_A4498_YP_002218024.1_-_4333841-4335631	0.0211396	YES	0.537095
SeD_A4499_YP_002218025.1_+_4335516-4335677	0.312439	YES	0.773051
SeD_A4500_YP_002218026.1_-_4336088-4336405	0.00194478	YES	0.521219
SeD_A4502_YP_002218028.1_+_4337833-4340265	0.0614322	YES	0.569969
SeD_A4511_YP_002218035.1_+_4349601-4350491	0.253151	YES	0.725594
SeD_A4524_YP_002218048.1_-_4366326-4368977	0.191145	YES	0.675078
SeD_A4555_YP_002218066.1_+_4393988-4394416	0.0737053	YES	0.579908
SeD_A4564_YP_002218074.1_+_4406209-4407237	0.00293217	YES	0.52204
SeD_A4577_YP_002218086.1_+_4417145-4417417	0.204038	YES	0.685592
SeD_A4579_YP_002218088.1_-_4418163-4418618	0.0107589	YES	0.528531
SeD_A4603_YP_002218104.1_+_4444940-4445479	0.145715	YES	0.638134
SeD_A4605_YP_002218106.1_-_4446392-4446664	0.0357134	YES	0.549043
SeD_A4609_YP_002218110.1_-_4449215-4450804	0.188212	YES	0.672687
SeD_A4616_YP_002218117.1_+_4457710-4457955	0.603229	YES	0.946536
SeD_A4626_YP_002218127.1_+_4469059-4469976	0.261537	YES	0.732388
SeD_A4639_YP_002218139.1_-_4481002-4481985	0.0507942	YES	0.561333
SeD_A4642_YP_002218142.1_-_4484547-4484678	0.277444	YES	0.745218
SeD_A4643_YP_002218143.1_+_4484762-4485955	0.105108	YES	0.605282
SeD_A4652_YP_002218152.1_+_4493316-4493948	0.0440928	YES	0.55588
SeD_A4654_YP_002218154.1_+_4495716-4496642	0.331953	YES	0.788242
SeD_A4656_YP_002218156.1_+_4497933-4514612	0.334147	YES	0.789932
SeD_A4657_YP_002218157.1_+_4514652-4516718	0.0757729	YES	0.58158
SeD_A4660_YP_002218159.1_-_4519429-4519752	0.00406504	YES	0.522982
SeD_A4690_YP_002218186.1_-_4552386-4553117	0.116482	YES	0.614472
SeD_A4697_YP_002218193.1_-_4563346-4563519	0.509852	YES	0.905749
SeD_A4707_YP_002218202.1_-_4574123-4574311	0.296948	YES	0.760811
SeD_A4708_YP_002218203.1_-_4574400-4574561	0.774355	YES	0.985686
SeD_A4710_YP_002218205.1_-_4574922-4575797	0.20549	YES	0.686776
SeD_A4715_YP_002218209.1_-_4578424-4578558	0.0938713	YES	0.596206
SeD_A4727_YP_002218219.1_+_4587624-4589270	0.0928173	YES	0.595355
SeD_A4758_YP_002218245.1_+_4617091-4617399	0.0858252	YES	0.589706
SeD_A4774_YP_002218260.1_+_4632130-4633752	0.0328442	YES	0.546697
SeD_A4775_YP_002218261.1_-_4633830-4634105	0.095285	YES	0.597348
SeD_A4778_YP_002218264.1_-_4635495-4636250	0.0298817	YES	0.544271
SeD_A4786_YP_002218271.1_-_4642317-4642595	0.0192203	YES	0.535515
SeD_A4792_YP_002218277.1_-_4645625-4646260	0.0832593	YES	0.587633
SeD_A4799_YP_002218284.1_-_4653557-4654405	0.042572	YES	0.55464
SeD_A4808_YP_002218292.1_+_4661430-4663163	0.218074	YES	0.697042
SeD_A4818_YP_002218301.1_+_4674187-4675527	0.0517891	YES	0.562142
SeD_A4819_YP_002218302.1_+_4675626-4676012	0.0118978	YES	0.529473
SeD_A4829_YP_002218312.1_+_4683797-4684039	0.163073	YES	0.652225
SeD_A4833_YP_002218316.1_+_4687341-4687511	0.209313	YES	0.689896
SeD_A4837_YP_002218319.1_-_4690803-4691750	0.13001	YES	0.625413
SeD_A4842_YP_002218324.1_-_4696416-4697351	0.114398	YES	0.612788
SeD_A4857_YP_002218337.1_-_4706838-4707326	0.00317683	YES	0.522243
SeD_A4866_YP_002218344.1_-_4717177-4718175	0.0429744	YES	0.554968
SeD_A4874_YP_002218350.1_+_4724613-4724861	0.12346	YES	0.620114
SeD_A4881_YP_002218355.2_+_4728206-4728946	0.010452	YES	0.528277
SeD_A5016_YP_003495236.1_+_4731398-4731850	0.129034	YES	0.624623
SeD_A4885_YP_002218359.1_+_4733276-4733485	0.0623556	YES	0.570718
SeD_A4904_YP_002218373.1_+_4744255-4744368	0.12118	YES	0.61827
SeD_A4908_YP_002218377.1_+_4745939-4746712	0.0765453	YES	0.582205
SeD_A4909_YP_002218378.1_-_4746713-4747726	0.0443444	YES	0.556085
SeD_A4921_YP_002218390.1_-_4758227-4758370	0.0789053	YES	0.584113
SeD_A4940_YP_002218403.1_+_4775006-4775122	0.225702	YES	0.703262
SeD_A4956_YP_002218419.1_-_4791793-4792254	0.260313	YES	0.731398
SeD_A4963_YP_002218426.1_-_4797048-4797506	0.0678591	YES	0.575176
SeD_A4976_YP_002218436.1_+_4805407-4806024	0.0604208	YES	0.569149
SeD_A5004_YP_002218461.1_-_4833287-4834372	0.000642506	YES	0.520135
SeD_A5006_YP_002218463.1_-_4834988-4837417	0.0424138	YES	0.554511
SeD_A5007_YP_002218464.1_-_4837571-4838254	0.106056	YES	0.606048
SeD_A5008_YP_002218465.1_-_4838325-4838870	0.0371514	YES	0.550218

[truncated: 10 more sheets: CVM19633, NCTC_12419, P125109, RKS4594, RSK2980, SC-B67, SL254, SL476, SL483, SPB7]
