# Supplementary material for: T3_MM: A Markov Model Effectively Classifies Bacterial Type III Secretion Signals
Source: PLoS One. 2013 Mar 5;8(3):e58173. doi: 10.1371/journal.pone.0058173 (PMC3589343; doi:10.1371/journal.pone.0058173)
Supplement: Table S4 — BPBAac predicted Salmonella effectors. (XLS) [file pone.0058173.s006.xls]

## Sheet: SL1344
Protein	Score	T3S protein or Not
SL0776__+_866199-868496	1.44974	YES
SL0284__+_329849-332038	1.35044	YES
SL1338__+_1444827-1445609	1.26901	YES
SL1561__+_1678146-1679372	1.25035	YES
SL1784__-_1909580-1910302	1.12695	YES
SL2924__+_3109160-3110113	1.09373	YES
SL2863__-_3050433-3051662	1.03186	YES
SL1327__+_1436851-1437252	0.986831	YES
SL1161__-_1265986-1266996	0.985143	YES
SL2861__-_3047255-3049312	0.947453	YES
SL1941__-_2051648-2053144	0.945315	YES
SL2674__+_2863004-2863726	0.896427	YES
SL1335__+_1443319-1443906	0.870305	YES
SL4354__-_4684521-4686026	0.860139	YES
SL0235__+_276017-278158	0.839307	YES
SL1113__+_1215225-1215923	0.838627	YES
SL1241__+_1342770-1344113	0.817542	YES
SL1889__+_2006970-2008373	0.811126	YES
SL2845__-_3032477-3033382	0.781611	YES
SL1299__+_1403356-1406412	0.713836	YES
SL2217__-_2338601-2340967	0.692084	YES
SL2043__+_2139285-2141633	0.682417	YES
SL2862__-_3049331-3050362	0.680255	YES
SL1011__-_1118696-1119205	0.675901	YES
SL1253__-_1353967-1356219	0.666459	YES
SL0157__-_183850-184482	0.662037	YES
SL1336__+_1443909-1444325	0.659499	YES
SL2876__-_3063058-3064176	0.638278	YES
SL2340__+_2481311-2482312	0.616481	YES
SL2715__-_2893177-2893725	0.616376	YES
SL2541__-_2720902-2721630	0.609732	YES
SL2429__-_2573259-2574275	0.570372	YES
SL1952__-_2060954-2061304	0.561515	YES
SL1334__+_1441849-1443303	0.555905	YES
SL0991__+_1096293-1097261	0.549498	YES
SL0992__+_1096293-1097261	0.549498	YES
SL0031__+_33364-34368	0.541072	YES
SL1332__+_1440786-1441376	0.523752	YES
SL1949__-_2057169-2058410	0.518028	YES
SL2026__+_2122929-2123939	0.497649	YES
SL1281__-_1382251-1383297	0.493739	YES
SL2024__+_2122149-2122640	0.488407	YES
SL2060__-_2160148-2161581	0.485731	YES
SL3429__+_3634117-3635184	0.482068	YES
SL0950__-_1061617-1061958	0.480395	YES
SL2610__-_2786319-2786702	0.473909	YES
SL1778__+_1903426-1906065	0.462295	YES
SL0958__+_1066521-1067123	0.459324	YES
SL0380__+_437615-438727	0.422469	YES
SL3312__-_3530564-3531355	0.422456	YES
SL2994__-_3197264-3198682	0.419651	YES
SL1484__-_1587258-1588724	0.418772	YES
SL2178__-_2298263-2299126	0.412808	YES
SL1825__-_1943983-1944984	0.410727	YES
SL2858__-_3044647-3046278	0.408266	YES
SL3730__+_3987006-3987908	0.403048	YES
SL2609__+_2785670-2786257	0.402064	YES
SL0980__+_1082510-1085563	0.393836	YES
SL3611__+_3854154-3854783	0.391422	YES
SL2864__-_3051690-3053471	0.384986	YES
SL0347__-_396543-397553	0.381492	YES
SL3725__-_3979512-3980300	0.374309	YES
SL2782__+_2968926-2969453	0.374031	YES
SL1076__-_1184165-1184911	0.368601	YES
SL0460__-_523445-523834	0.362984	YES
SL4268__+_4597564-4597935	0.362945	YES
SL1890__+_2008388-2008795	0.356464	YES
SL2458__+_2607190-2607549	0.353565	YES
SL2952__+_3145060-3145875	0.347092	YES
SL2726__+_2903009-2904202	0.334451	YES
SL2539__-_2719779-2720159	0.32517	YES
SL2141__-_2255678-2256625	0.320293	YES
SL3759__-_4014903-4015823	0.316745	YES
SL3477__+_3690218-3690901	0.316604	YES
SL2911__-_3094537-3094893	0.314607	YES
SL2582__-_2762220-2762822	0.308865	YES
SL4454__-_4797630-4797962	0.303921	YES
SL2839__+_3026281-3028359	0.294416	YES
SL3073__-_3279831-3280517	0.294062	YES
SL4269__-_4597983-4598840	0.293299	YES
SL3858__-_4127090-4127938	0.28846	YES
SL2102__+_2210207-2211559	0.283536	YES
SL4310__+_4640194-4641816	0.281233	YES
SL1532__+_1649034-1649984	0.280642	YES
SL2049__+_2148332-2149636	0.274028	YES
SL1761__+_1887926-1888786	0.271607	YES
SL1121__+_1223286-1224239	0.270107	YES
SL2387__-_2534486-2535412	0.266139	YES
SL2436__+_2580246-2581196	0.264357	YES
SL1022__+_1129068-1129847	0.264292	YES
SL0019__+_20058-23054	0.254253	YES
SL3442__+_3647538-3647864	0.253489	YES
SL1030__-_1134553-1136238	0.253259	YES
SL3728__-_3982856-3985582	0.252815	YES
SL3235__+_3452174-3452947	0.24412	YES
SL2847__-_3034683-3035570	0.24069	YES
SL1905__+_2021103-2022107	0.232898	YES
SL2949__+_3140305-3141669	0.230107	YES
SL1287__-_1390406-1391341	0.229937	YES
SL4418__+_4752546-4756061	0.229737	YES
SL0163__+_191146-192417	0.225811	YES
SL3190__-_3403460-3404980	0.223523	YES
SL1678__+_1798160-1798474	0.223501	YES
SL3816__+_4077661-4078416	0.222711	YES
SL2449__-_2598826-2599689	0.220666	YES
SL4056__+_4341021-4343201	0.219865	YES
SL0253__+_298231-299010	0.216023	YES
SL1926__-_2038731-2039150	0.21025	YES
SL0285__+_332062-332508	0.210079	YES
SL0518__+_586187-587335	0.209521	YES
SL3278__+_3495967-3496254	0.205253	YES
SL2624__+_2808081-2808419	0.205202	YES
SL3580__-_3813039-3814958	0.202734	YES
SL3625__-_3866228-3867682	0.202347	YES
SL1493__-_1601090-1601521	0.194979	YES
SL4204__+_4527438-4528787	0.194782	YES
SL3867__+_4137527-4137868	0.192541	YES
SL3762__-_4017229-4018917	0.190975	YES
SL0942__-_1054795-1056087	0.182559	YES
SL3976__-_4261087-4261515	0.17557	YES
SL0546__-_613238-613582	0.17458	YES
SL0017__-_17043-17486	0.173916	YES
SL3584__-_3822167-3824791	0.172762	YES
SL2258__-_2393756-2394559	0.170121	YES
SL4099__-_4399483-4400253	0.170057	YES
SL2778__+_2967028-2967705	0.168534	YES
SL0241__+_281229-281651	0.168042	YES
SL2718__-_2895264-2896103	0.166913	YES
SL0319__-_368675-369475	0.165765	YES
SL1668__-_1788113-1788841	0.165685	YES
SL3286__+_3501430-3502365	0.162172	YES
SL4116__-_4421536-4421973	0.159035	YES
SL1388__-_1487363-1488421	0.158625	YES
SL0760__+_846394-847452	0.157875	YES
SL1065__-_1171598-1172479	0.15592	YES
SL1145__+_1247914-1248738	0.153435	YES
SL1991__-_2094011-2094940	0.152131	YES
SL0032__-_34376-34816	0.149335	YES
SL2679__-_2867446-2867805	0.146992	YES
SL2545__-_2724489-2726288	0.145813	YES
SL1049__-_1154000-1154362	0.13761	YES
SL2492__-_2660629-2663034	0.135392	YES
SL3702__-_3949748-3950605	0.135155	YES
SL0909__+_1010628-1011587	0.129449	YES
SL2856__+_3042432-3044093	0.128417	YES
SL4069__-_4356691-4359342	0.126366	YES
SL0753__-_839835-840851	0.125633	YES
SL0141__+_164057-165100	0.122091	YES
SL0321__+_369691-370107	0.121338	YES
SL1559__+_1676474-1676875	0.120276	YES
SL1965__-_2070185-2071393	0.120012	YES
SL2206__-_2328677-2329147	0.118738	YES
SL4386__-_4718940-4719887	0.116715	YES
SL3891__-_4164666-4165835	0.108306	YES
SL2941__-_3132002-3133342	0.106889	YES
SL2359__-_2499456-2499740	0.106804	YES
SL0364__+_418473-419642	0.106471	YES
SL2045__-_2143542-2144906	0.104894	YES
SL3381__-_3604359-3604742	0.104394	YES
SL1166__+_1270948-1271457	0.103456	YES
SL1746__-_1872138-1872647	0.103456	YES
SL1886__-_2003303-2003812	0.103456	YES
SL2434__-_2577047-2577556	0.103456	YES
SL3267__-_3485437-3485946	0.103456	YES
SL3446__-_3656679-3657188	0.103456	YES
SL2473__+_2623795-2625144	0.0995225	YES
SL4175__+_4481327-4482652	0.0984267	YES
SL1171__-_1277714-1278361	0.0980569	YES
SL2757__+_2937418-2937990	0.0971686	YES
SL2521__+_2697667-2699811	0.0943091	YES
SL1307__+_1413037-1414257	0.0931718	YES
SL1339__+_1445606-1446295	0.0931261	YES
SL2284__-_2419401-2421182	0.0928326	YES
SL1787__-_1912575-1912994	0.0830363	YES
SL1788__-_1912575-1912994	0.0830363	YES
SL0091__-_102666-103487	0.0823601	YES
SL2056__-_2154547-2155530	0.0807793	YES
SL3174__-_3384745-3387588	0.0766332	YES
SL1199__+_1303449-1304237	0.0759011	YES
SL3602__-_3844343-3844900	0.0730315	YES
SL3133__-_3340712-3341446	0.0706067	YES
SL3772__-_4027697-4028059	0.0681446	YES
SL1062__-_1163919-1167881	0.06769	YES
SL1028__+_1133859-1134185	0.0645447	YES
SL2018__+_2118037-2118558	0.062616	YES
SL0961__+_1068076-1068873	0.0597867	YES
SL0517__+_584866-586164	0.0596052	YES
SL2805__-_2991566-2992132	0.0576555	YES
SL0850__+_945042-945644	0.0566991	YES
SL1026__-_1131870-1132550	0.0542855	YES
SL0536__+_603618-604160	0.0508681	YES
SL3226__+_3443310-3444164	0.0468184	YES
SL0711__-_794182-795144	0.0466121	YES
SL0755__-_842153-843628	0.0452744	YES
SL1079__-_1185868-1186518	0.0393855	YES
SL3791__-_4046645-4047685	0.0355932	YES
SL3288__+_3503386-3503952	0.0354635	YES
SL4470__+_4818059-4819120	0.0328262	YES
SL4478__+_4826700-4827425	0.029937	YES
SL2900__+_3085743-3086336	0.0282568	YES
SL2187__-_2307862-2308116	0.0280968	YES
SL0444__+_505028-507382	0.0267901	YES
SL1662__+_1783786-1784664	0.0237127	YES
SL1768__-_1894129-1894416	0.0236311	YES
SL3890__-_4163467-4164606	0.0228203	YES
SL3662__+_3912770-3913966	0.0222918	YES
SL2033__+_2129155-2130369	0.0177178	YES
SL1805__+_1923923-1924576	0.016263	YES
SL1801__-_1922080-1922343	0.0161542	YES
SL4407__-_4741031-4742542	0.0157661	YES
SL1504__+_1613198-1613638	0.0130892	YES
SL2293__-_2432367-2433704	0.0130034	YES
SL0096__-_109334-109993	0.00951015	YES
SL2897__-_3083265-3084188	0.00843499	YES
SL0277__+_321087-322391	0.00840233	YES
SL0810__+_901532-902005	0.00821624	YES
SL0008__+_8729-9319	0.00586261	YES
SL1487__+_1591598-1592800	0.0057955	YES

## Sheet: 14028s
Protein	Score	T3S protein or Not
STM14_928_ACY87425.1_+_867285-869582	1.76043	YES
STM14_1698_ACY88176.1_+_1497033-1497449	1.47595	YES
STM14_0338_ACY86864.1_+_330558-332747	1.30886	YES
STM14_2244_ACY88707.1_-_1963417-1964139	1.26293	YES
STM14_1974_ACY88445.1_+_1731270-1732496	1.21311	YES
STM14_3483_ACY89897.1_-_3048094-3049323	1.20033	YES
STM14_1347_ACY87835.1_+_1217246-1217944	1.1466	YES
STM14_1700_ACY88178.1_+_1497951-1498733	1.09772	YES
STM14_1400_ACY87887.1_-_1268007-1269017	1.04993	YES
STM14_3550_ACY89963.1_+_3107324-3108277	1.04202	YES
STM14_1585_ACY88064.1_+_1395893-1397236	0.977273	YES
STM14_1688_ACY88166.1_+_1489975-1490376	0.976236	YES
STM14_2380_ACY88833.1_+_2060807-2062210	0.969028	YES
STM14_3481_ACY89895.1_-_3044916-3046973	0.948598	YES
STM14_1697_ACY88175.1_+_1496443-1497030	0.942234	YES
STM14_3042_ACY89474.1_+_2643176-2645014	0.940797	YES
STM14_2441_ACY88891.1_-_2105484-2106980	0.937268	YES
STM14_3462_ACY89876.1_-_3030207-3031043	0.937104	YES
STM14_3033_ACY89465.1_+_2634082-2635032	0.926096	YES
STM14_0276_ACY86810.1_+_276726-278867	0.914826	YES
STM14_5312_ACY91647.1_-_4676770-4678275	0.895436	YES
STM14_1659_ACY88137.1_+_1456480-1459536	0.892566	YES
STM14_1237_ACY87729.1_-_1136575-1138260	0.88867	YES
STM14_3729_ACY90136.1_-_3268048-3270024	0.847444	YES
STM14_2557_ACY89002.1_+_2193122-2195470	0.822767	YES
STM14_1215_ACY87708.1_-_1120718-1121227	0.790401	YES
STM14_2919_ACY89358.1_+_2535147-2536148	0.787385	YES
STM14_3496_ACY89910.1_-_3060719-3061837	0.740644	YES
STM14_2769_ACY89210.1_-_2392438-2394804	0.683075	YES
STM14_2454_ACY88904.1_-_2114790-2115140	0.68034	YES
STM14_2577_ACY89022.1_-_2213985-2215418	0.66652	YES
STM14_1600_ACY88079.1_-_1407090-1409342	0.644097	YES
STM14_2537_ACY88982.1_+_2175986-2176477	0.636317	YES
STM14_1181_ACY87675.1_+_1084368-1087355	0.619394	YES
STM14_3159_ACY89590.1_-_2774738-2775466	0.619169	YES
STM14_2717_ACY89160.1_-_2352100-2352963	0.60963	YES
STM14_0038_ACY86575.1_+_33364-34368	0.606078	YES
STM14_2979_ACY89411.1_-_2588322-2589248	0.598964	YES
STM14_3024_ACY89456.1_-_2627095-2628111	0.591979	YES
STM14_3243_ACY89672.1_-_2839740-2840123	0.585987	YES
STM14_1193_ACY87687.1_+_1098316-1099284	0.57532	YES
STM14_1696_ACY88174.1_+_1494973-1496427	0.571041	YES
STM14_1694_ACY88172.1_+_1493910-1494500	0.564685	YES
STM14_4184_ACY90574.1_+_3639914-3640240	0.563402	YES
STM14_1940_ACY88411.1_+_1702158-1703108	0.551837	YES
STM14_1158_ACY87652.1_+_1068313-1068915	0.549731	YES
STM14_0455_ACY86975.1_+_438822-439934	0.54396	YES
STM14_1776_ACY88250.1_-_1559385-1559690	0.523908	YES
STM14_4168_ACY90558.1_+_3626493-3627560	0.523407	YES
STM14_2539_ACY88984.1_+_2176766-2177776	0.499341	YES
STM14_3375_ACY89794.1_+_2966585-2967112	0.483723	YES
STM14_1635_ACY88114.1_-_1435374-1436420	0.483086	YES
STM14_1877_ACY88348.1_-_1640382-1641848	0.475941	YES
STM14_2667_ACY89110.1_-_2309515-2310462	0.470479	YES
STM14_2566_ACY89011.1_+_2202169-2203473	0.469393	YES
STM14_1444_ACY87930.1_+_1300142-1300696	0.460361	YES
STM14_1415_ACY87901.1_-_1282422-1283087	0.459856	YES
STM14_0037_ACY86574.1_-_32545-32994	0.4497	YES
STM14_2236_ACY88699.1_+_1957263-1959902	0.447476	YES
STM14_4031_ACY90427.1_-_3523043-3523834	0.442647	YES
STM14_1701_ACY88179.1_+_1498730-1499419	0.441313	YES
STM14_3484_ACY89898.1_-_3049351-3051132	0.440554	YES
STM14_0118_ACY86655.1_-_116189-116941	0.440334	YES
STM14_3641_ACY90050.1_-_3195611-3197029	0.438599	YES
STM14_3742_ACY90148.1_-_3278250-3278936	0.43648	YES
STM14_3482_ACY89896.1_-_3046992-3048023	0.436336	YES
STM14_5430_ACY91761.1_+_4787291-4788661	0.428411	YES
STM14_3157_ACY89588.1_-_2773615-2773995	0.428021	YES
STM14_3049_ACY89481.1_-_2652662-2653525	0.421737	YES
STM14_0303_ACY86830.1_+_298940-299719	0.420448	YES
STM14_2397_ACY88850.1_+_2074940-2075944	0.416743	YES
STM14_1755_ACY88231.1_-_1540487-1541545	0.412801	YES
STM14_4541_ACY90922.1_+_3979384-3980286	0.405848	YES
STM14_3242_ACY89671.1_+_2839091-2839678	0.405705	YES
STM14_1227_ACY87720.1_+_1131090-1131869	0.404782	YES
STM14_3207_ACY89636.1_-_2816067-2816669	0.400556	YES
STM14_0339_ACY86865.1_+_332771-333217	0.388908	YES
STM14_2378_ACY88831.1_-_2059063-2060550	0.382723	YES
STM14_3338_ACY89758.1_-_2933465-2934985	0.382723	YES
STM14_3266_ACY89690.1_+_2861585-2861923	0.380982	YES
STM14_3568_ACY89981.1_-_3130349-3131689	0.377649	YES
STM14_4644_ACY91020.1_+_4070043-4070798	0.376477	YES
STM14_1355_ACY87843.1_+_1225307-1226260	0.372257	YES
STM14_0039_ACY86576.1_-_34376-34816	0.368047	YES
STM14_3477_ACY89891.1_-_3042308-3043939	0.364153	YES
STM14_1342_ACY87830.1_-_1215209-1215502	0.364007	YES
STM14_3825_ACY90228.1_-_3338260-3338994	0.361323	YES
STM14_0489_ACY87008.1_-_468230-469198	0.354285	YES
STM14_3944_ACY90343.1_+_3444653-3445426	0.352282	YES
STM14_4529_ACY90911.1_-_3971890-3972678	0.349758	YES
STM14_0023_ACY86560.1_+_20058-23054	0.349187	YES
STM14_3578_ACY89990.1_+_3138652-3140016	0.346385	YES
STM14_5209_ACY91547.1_+_4589814-4590185	0.330372	YES
STM14_4574_ACY90955.1_-_4007283-4008203	0.325053	YES
STM14_1483_ACY87967.1_+_1332051-1334153	0.323576	YES
STM14_4693_ACY91062.1_-_4119236-4120084	0.322539	YES
STM14_3894_ACY90296.1_-_3401008-3402528	0.31844	YES
STM14_1285_ACY87774.1_-_1173620-1174501	0.316419	YES
STM14_3536_ACY89949.1_-_3092213-3092569	0.314607	YES
STM14_5504_ACY91832.1_+_4853863-4854189	0.313828	YES
STM14_2111_ACY88577.1_+_1851996-1852310	0.309431	YES
STM14_3059_ACY89491.1_+_2661026-2661385	0.309281	YES
STM14_2756_ACY89197.1_-_2382514-2382984	0.298271	YES
STM14_1886_ACY88357.1_-_1654214-1654645	0.294813	YES
STM14_1643_ACY88122.1_-_1443529-1444464	0.294588	YES
STM14_0550_ACY87068.1_-_524651-525040	0.294501	YES
STM14_1306_ACY87794.1_-_1187890-1188540	0.294058	YES
STM14_1025_ACY87520.1_+_946833-947555	0.29046	YES
STM14_4227_ACY90617.1_+_3682594-3683277	0.289405	YES
STM14_1666_ACY88144.1_+_1464893-1466164	0.289097	YES
STM14_3305_ACY89727.1_+_2900669-2901862	0.288511	YES
STM14_2055_ACY88523.1_+_1803813-1804946	0.283359	YES
STM14_3370_ACY89789.1_+_2964687-2965364	0.282119	YES
STM14_2375_ACY88828.1_-_2057140-2057649	0.281857	YES
STM14_0536_ACY87054.1_-_511028-511390	0.279842	YES
STM14_2622_ACY89067.1_+_2264044-2265396	0.279011	YES
STM14_2381_ACY88834.1_+_2062225-2062632	0.277921	YES
STM14_2471_ACY88921.1_-_2124021-2125178	0.272927	YES
STM14_1667_ACY88145.1_+_1466161-1467381	0.272922	YES
STM14_4954_ACY91310.1_-_4348838-4351489	0.270991	YES
STM14_4461_ACY90845.1_-_3909728-3910195	0.269624	YES
STM14_1382_ACY87869.1_+_1249935-1250759	0.261105	YES
STM14_2573_ACY89018.1_-_2208384-2209367	0.255113	YES
STM14_3877_ACY90280.1_-_3382293-3385136	0.249045	YES
STM14_5434_ACY91765.1_-_4789880-4790212	0.248347	YES
STM14_1970_ACY88441.1_+_1729598-1729999	0.243477	YES
STM14_4358_ACY90746.1_-_3814543-3817167	0.243145	YES
STM14_5210_ACY91548.1_-_4590233-4591090	0.242809	YES
STM14_4413_ACY90797.1_-_3858604-3860058	0.241445	YES
STM14_0904_ACY87402.1_-_843239-844714	0.240779	YES
STM14_3993_ACY90389.1_+_3488446-3488733	0.240403	YES
STM14_2826_ACY89266.1_-_2447593-2448396	0.23859	YES
STM14_2214_ACY88677.1_+_1941763-1942623	0.234784	YES
STM14_1481_ACY87966.1_+_1330809-1331156	0.233317	YES
STM14_2423_ACY88875.1_-_2092568-2092987	0.232624	YES
STM14_5386_ACY91718.1_+_4744796-4748311	0.230165	YES
STM14_0007_ACY86544.1_+_7665-8618	0.226451	YES
STM14_5373_ACY91706.1_-_4733281-4734792	0.225787	YES
STM14_2249_ACY88712.1_-_1966412-1966831	0.224872	YES
STM14_4117_ACY90508.1_-_3596735-3597118	0.223626	YES
STM14_1140_ACY87634.1_-_1056587-1057879	0.22356	YES
STM14_0223_ACY86758.1_+_219013-221487	0.220199	YES
STM14_4577_ACY90958.1_-_4009609-4011297	0.220122	YES
STM14_2468_ACY88918.1_-_2122501-2123025	0.216744	YES
STM14_3103_ACY89534.1_-_2714465-2716870	0.216492	YES
STM14_5133_ACY91472.1_+_4519688-4521037	0.216452	YES
STM14_1851_ACY88323.1_-_1618880-1619941	0.213554	YES
STM14_0901_ACY87399.1_-_840921-841937	0.212081	YES
STM14_0762_ACY87274.1_-_717574-718569	0.209733	YES
STM14_5027_ACY91368.1_-_4413786-4414223	0.207603	YES
STM14_1899_ACY88370.1_+_1666322-1666762	0.206698	YES
STM14_1525_ACY88004.1_+_1356571-1357359	0.204993	YES
STM14_0194_ACY86729.1_+_191855-193126	0.204837	YES
STM14_2334_ACY88791.1_-_2026160-2028052	0.204378	YES
STM14_0109_ACY86646.1_-_103375-104196	0.204148	YES
STM14_2503_ACY88948.1_-_2147847-2148776	0.202807	YES
STM14_3339_ACY89759.1_+_2935077-2935649	0.20088	YES
STM14_2030_ACY88498.1_+_1785562-1786068	0.199781	YES
STM14_0352_ACY86875.1_+_342894-343406	0.19978	YES
STM14_1235_ACY87727.1_+_1135887-1136207	0.197486	YES
STM14_2094_ACY88561.1_+_1837622-1838500	0.196831	YES
STM14_3465_ACY89879.1_-_3032344-3033231	0.195727	YES
STM14_0615_ACY87132.1_+_587393-588541	0.194146	YES
STM14_3527_ACY89940.1_-_3086786-3087919	0.187594	YES
STM14_975_ACY87472.1_+_903323-903796	0.185849	YES
STM14_3077_ACY89509.1_+_2677631-2678980	0.185233	YES
STM14_4936_ACY91293.1_+_4333168-4335348	0.183406	YES
STM14_2346_ACY88803.1_-_2036100-2037002	0.179251	YES
STM14_1261_ACY87753.1_-_1156022-1156384	0.179135	YES
STM14_0282_ACY86816.1_+_281938-282360	0.179106	YES
STM14_2853_ACY89292.1_-_2473237-2475018	0.175791	YES
STM14_3164_ACY89595.1_+_2780529-2782022	0.170131	YES
STM14_4593_ACY90972.1_-_4020076-4020438	0.169722	YES
STM14_0381_ACY86902.1_-_369882-370682	0.169251	YES
STM14_3584_ACY89996.1_+_3143407-3144222	0.169057	YES
STM14_0169_ACY86705.1_+_164766-165809	0.168961	YES
STM14_2560_ACY89005.1_-_2197379-2198743	0.168691	YES
STM14_2714_ACY89157.1_+_2349999-2350304	0.168095	YES
STM14_4699_ACY91068.1_+_4124310-4124570	0.164544	YES
STM14_0909_ACY87407.1_+_847480-848538	0.163679	YES
STM14_3939_ACY90340.1_+_3440858-3441712	0.160383	YES
STM14_4735_ACY91099.1_-_4156812-4157981	0.159095	YES
STM14_0432_ACY86952.1_+_419680-420849	0.157868	YES
STM14_1098_ACY87592.1_+_1012420-1013379	0.157859	YES
STM14_1162_ACY87656.1_+_1069868-1070665	0.157812	YES
STM14_3163_ACY89594.1_-_2778325-2780124	0.155895	YES
STM14_0614_ACY87131.1_+_586072-587370	0.152931	YES
STM14_5030_ACY91371.1_+_4417211-4418515	0.15248	YES
STM14_1007_ACY87503.1_+_931384-933069	0.150168	YES
STM14_5259_ACY91594.1_+_4632426-4634066	0.148825	YES
STM14_3455_ACY89869.1_+_3023829-3026018	0.136812	YES
STM14_1232_ACY87724.1_-_1133892-1134572	0.134746	YES
STM14_5195_ACY91534.1_+_4578830-4579162	0.133288	YES
STM14_0019_ACY86556.1_-_17043-17486	0.13272	YES
STM14_4536_ACY90917.1_-_3975234-3977960	0.127714	YES
STM14_5355_ACY91688.1_-_4717965-4718453	0.12591	YES
STM14_4704_ACY91073.1_+_4129673-4130014	0.124629	YES
STM14_3138_ACY89569.1_+_2751503-2753647	0.12338	YES
STM14_3516_ACY89929.1_-_3077279-3078229	0.122528	YES
STM14_0688_ACY87200.1_-_651479-652273	0.118573	YES
STM14_1411_ACY87897.1_-_1279735-1280382	0.116319	YES
STM14_1230_ACY87723.1_-_1132612-1133271	0.115721	YES
STM14_5075_ACY91414.1_+_4453703-4455352	0.110694	YES
STM14_5453_ACY91784.1_+_4810309-4811370	0.108988	YES
STM14_3982_ACY90379.1_-_3480623-3481249	0.108744	YES
STM14_2865_ACY89304.1_-_2486203-2487540	0.108607	YES
STM14_3015_ACY89447.1_-_2617888-2618784	0.108045	YES
STM14_3520_ACY89933.1_-_3080941-3081864	0.104771	YES
STM14_2428_ACY88879.1_+_2094340-2095347	0.104496	YES
STM14_2531_ACY88976.1_+_2171874-2172395	0.103722	YES
STM14_4922_ACY91279.1_-_4315766-4316956	0.102824	YES
STM14_3365_ACY89784.1_+_2958076-2959053	0.100239	YES
STM14_2731_ACY89174.1_-_2361699-2361953	0.0942133	YES
STM14_5377_ACY91710.1_-_4737564-4738562	0.0941154	YES
STM14_1417_ACY87903.1_-_1284622-1285764	0.0933733	YES
STM14_2939_ACY89378.1_-_2553292-2553576	0.0879004	YES
STM14_1995_ACY88466.1_+_1752102-1755626	0.0875165	YES
STM14_0640_ACY87157.1_+_610386-610904	0.0868877	YES
STM14_4465_ACY90849.1_+_3912810-3914093	0.0860601	YES
STM14_2475_ACY88925.1_+_2127428-2127961	0.0834772	YES
STM14_3252_ACY89681.1_-_2848209-2849510	0.0826854	YES
STM14_1842_ACY88314.1_+_1611160-1612548	0.08072	YES
STM14_4844_ACY91201.1_-_4253233-4253661	0.080705	YES
STM14_1064_ACY87559.1_+_981027-983303	0.0790817	YES
STM14_2267_ACY88726.1_-_1975917-1976180	0.071123	YES
STM14_4203_ACY90593.1_-_3659109-3659648	0.0693707	YES
STM14_1199_ACY87692.1_+_1102354-1105098	0.0666922	YES
STM14_5348_ACY91681.1_-_4711190-4712266	0.0664655	YES
STM14_0799_ACY87303.1_+_747918-749585	0.0623446	YES
STM14_3727_ACY90134.1_-_3266219-3266968	0.06231	YES
STM14_2166_ACY88629.1_+_1900159-1901007	0.0595479	YES
STM14_5502_ACY91830.1_-_4849992-4851659	0.0590788	YES
STM14_1728_ACY88204.1_+_1519171-1519452	0.0588437	YES
STM14_0269_ACY86803.1_+_267151-267696	0.0585529	YES
STM14_1096_ACY87590.1_-_1011047-1011844	0.058362	YES
STM14_0858_ACY87362.1_+_807574-808443	0.0571087	YES
STM14_3277_ACY89701.1_-_2869178-2869945	0.0533698	YES
STM14_1458_ACY87944.1_+_1308154-1309773	0.0511678	YES
STM14_4024_ACY90420.1_+_3515734-3516987	0.0494743	YES
STM14_0115_ACY86652.1_-_110043-110702	0.0484754	YES
STM14_5206_ACY91544.1_+_4587425-4587898	0.048356	YES
STM14_2225_ACY88688.1_-_1947966-1948253	0.0459075	YES
STM14_3930_ACY90331.1_-_3434706-3435596	0.0423013	YES
STM14_3117_ACY89548.1_-_2732675-2733061	0.042044	YES
STM14_1714_ACY88192.1_+_1507684-1508652	0.0417731	YES
STM14_3250_ACY89679.1_+_2846489-2847844	0.0411374	YES
STM14_3475_ACY89889.1_+_3040093-3041754	0.0386952	YES
STM14_5463_ACY91794.1_+_4818950-4819675	0.034291	YES
STM14_2086_ACY88553.1_+_1829239-1830801	0.0333401	YES
STM14_4335_ACY90723.1_-_3790937-3792526	0.0332836	YES
STM14_3936_ACY90337.1_-_3438733-3439680	0.0322296	YES
STM14_5001_ACY91346.1_-_4391733-4392503	0.0317865	YES
STM14_1679_ACY88157.1_-_1480409-1481161	0.0317213	YES
STM14_3530_ACY89943.1_-_3088715-3089476	0.0312124	YES
STM14_4010_ACY90406.1_+_3500167-3500658	0.0305207	YES
STM14_4344_ACY90732.1_+_3796753-3798075	0.0280612	YES
STM14_1412_ACY87898.1_-_1280463-1281569	0.0276588	YES
STM14_2208_ACY88671.1_+_1934781-1936145	0.0266045	YES
STM14_2350_ACY88806.1_+_2038645-2039148	0.0265644	YES
STM14_5318_ACY91653.1_+_4681846-4683189	0.022047	YES
STM14_4743_ACY91107.1_+_4163805-4164167	0.0212369	YES
STM14_2829_ACY89269.1_-_2450986-2451768	0.0210663	YES
STM14_1479_ACY87964.1_+_1328944-1329528	0.0192329	YES
STM14_2391_ACY88844.1_+_2069619-2070614	0.0184048	YES
STM14_3348_ACY89768.1_-_2943824-2946004	0.0179047	YES
STM14_2546_ACY88991.1_+_2182992-2184206	0.0167627	YES
STM14_1706_ACY88184.1_+_1501020-1501568	0.015497	YES
STM14_5051_ACY91391.1_-_4436356-4437471	0.0143618	YES
STM14_3669_ACY90076.1_-_3216714-3217472	0.0142735	YES
STM14_2174_ACY88637.1_+_1907957-1908691	0.0131165	YES
STM14_0752_ACY87264.1_+_706273-707367	0.0108293	YES
STM14_3523_ACY89936.1_+_3083419-3084012	0.0074379	YES
STM14_2392_ACY88845.1_+_2070607-2071314	0.00676409	YES
STM14_4975_ACY91326.1_-_4372275-4373225	0.00592519	YES
STM14_3537_ACY89950.1_-_3092587-3093192	0.00572963	YES
STM14_4966_ACY91322.1_+_4363484-4364335	0.00467205	YES
STM14_5311_ACY91646.1_-_4675936-4676745	0.0025934	YES
STM14_1044_ACY87539.1_-_963053-963568	0.00178038	YES
STM14_3405_ACY89824.1_-_2989225-2989791	0.00130561	YES
STM14_0722_ACY87234.1_-_684325-685854	0.00108149	YES
STM14_4457_ACY90841.1_+_3905147-3906343	0.000858708	YES

## Sheet: LT2
Protein	Score	T3S protein or Not
STM0800_NP_459778.1_+_866944-869241	1.76043	YES
STM1402_NP_460367.1_+_1487057-1487473	1.47595	YES
STM0289_NP_459287.1_+_329873-332062	1.30886	YES
STM1855_NP_460811.1_-_1952012-1952734	1.26293	YES
STM1631_NP_460590.1_+_1721293-1722519	1.21311	YES
STM2884_NP_461805.1_-_3027857-3029086	1.20033	YES
STM1176_NP_460147.1_+_1259083-1259781	1.1466	YES
STM1404_NP_460369.1_+_1487975-1488757	1.09772	YES
STM2727_NP_461654.1_-_2869683-2869988	1.07282	YES
STM1224_NP_460194.1_-_1309844-1310854	1.04993	YES
STM2945_NP_461866.1_+_3087148-3088101	1.04202	YES
STM1306_NP_460272.1_+_1385917-1387260	0.977273	YES
STM1393_NP_460358.1_+_1479999-1480400	0.976236	YES
STM1960_NP_460913.1_+_2049402-2050805	0.969028	YES
STM2882_NP_461803.1_-_3024679-3026736	0.948598	YES
STM1401_NP_460366.1_+_1486467-1487054	0.942234	YES
STM2865_NP_461786.1_-_3009898-3010806	0.937104	YES
STM2473_NP_461408.1_+_2582530-2583480	0.926096	YES
STM0234_NP_459239.1_+_276022-278163	0.914826	YES
STM4421_NP_463282.1_-_4663940-4665445	0.895436	YES
STM1365_NP_460330.1_+_1446504-1449560	0.892566	YES
STM1091_NP_460064.1_-_1178231-1179916	0.88867	YES
STM3086_NP_462002.1_-_3248927-3250903	0.847444	YES
STM2066_NP_461011.1_+_2141570-2143918	0.822767	YES
STM1071_NP_460045.1_-_1162374-1162883	0.790401	YES
STM2371_NP_461313.1_+_2483595-2484596	0.787385	YES
STM2897_NP_461818.1_-_3040482-3041600	0.740644	YES
STM2241_NP_461184.1_-_2340885-2343251	0.683075	YES
STM2083_NP_461028.1_-_2162433-2163866	0.66652	YES
STM1318_NP_460284.1_-_1397114-1399366	0.644097	YES
STM2048_NP_460993.1_+_2124434-2124925	0.636317	YES
STM1041_NP_460016.1_+_1126009-1128996	0.619394	YES
STM2579_NP_461514.1_-_2723185-2723913	0.619169	YES
STM2201_NP_461146.1_-_2300547-2301410	0.60963	YES
STM0030_NP_459035.1_+_33364-34368	0.606078	YES
STM2424_NP_461359.1_-_2536770-2537696	0.598964	YES
STM2466_NP_461401.1_-_2575543-2576559	0.591979	YES
STM2646_NP_461581.1_-_2785906-2786289	0.585987	YES
STM1051_NP_460026.1_+_1139971-1140939	0.57532	YES
STM1400_NP_460365.1_+_1484997-1486451	0.571041	YES
STM1398_NP_460363.1_+_1483934-1484524	0.564685	YES
STM3475_NP_462378.1_+_3626055-3626381	0.563402	YES
STM1602_NP_460561.1_+_1692181-1693131	0.551837	YES
STM1020_NP_459995.1_+_1109954-1110556	0.549731	YES
STM0385_NP_459380.1_+_438129-439241	0.54396	YES
STM1891_NP_460848.1_-_1986415-1987416	0.537862	YES
STM2050_NP_460995.1_+_2125214-2126224	0.499341	YES
STM3462_NP_462365.1_+_3612635-3613702	0.491702	YES
STM2798_NP_461724.1_+_2946350-2946877	0.483723	YES
STM1347_NP_460313.1_-_1425398-1426444	0.483086	YES
STM1554_NP_460513.1_-_1630405-1631871	0.475941	YES
STM2163_NP_461108.1_-_2257962-2258909	0.470479	YES
STM2072_NP_461017.1_+_2150617-2151921	0.469393	YES
STM1237_NP_460207.1_-_1323548-1324213	0.459856	YES
STM0029_NP_459034.1_-_32545-32994	0.4497	YES
STM1849_NP_460805.1_+_1945858-1948497	0.447476	YES
STM3340_NP_462250.1_-_3509147-3509938	0.442647	YES
STM1405_NP_460370.1_+_1488754-1489443	0.441313	YES
STM2885_NP_461806.1_-_3029114-3030895	0.440554	YES
STM3016_NP_461933.1_-_3175802-3177220	0.438599	YES
STM3098_NP_462014.1_-_3259128-3259814	0.43648	YES
STM2883_NP_461804.1_-_3026755-3027786	0.436336	YES
STM4519_NP_463378.1_+_4774458-4775828	0.428411	YES
STM2577_NP_461512.1_-_2722062-2722442	0.428021	YES
STM2620_NP_461555.1_-_2764531-2765133	0.424511	YES
STM2486_NP_461421.1_-_2601110-2601973	0.421737	YES
STM0258_NP_459256.1_+_298240-299019	0.420448	YES
STM1976_NP_460929.1_+_2063535-2064539	0.416743	YES
STM1456_NP_460419.1_-_1530511-1531569	0.412801	YES
STM3765_NP_462664.1_+_3965692-3966594	0.405848	YES
STM2645_NP_461580.1_+_2785257-2785844	0.405705	YES
STM1082_NP_460056.1_+_1172746-1173525	0.404782	YES
STM2709_NP_461637.1_-_2857059-2857418	0.403337	YES
STM0290_NP_459288.1_+_332086-332532	0.388908	YES
STM1959_NP_460912.1_-_2047658-2049145	0.382723	YES
STM2771_NP_461698.1_-_2913230-2914750	0.382723	YES
STM2665_NP_461595.1_+_2807668-2808006	0.380982	YES
STM2960_NP_461881.1_-_3110539-3111879	0.377649	YES
STM3849_NP_462748.1_+_4056350-4057105	0.376477	YES
STM1184_NP_460155.1_+_1267144-1268097	0.372257	YES
STM2878_NP_461799.1_-_3022071-3023702	0.364153	YES
STM1172_NP_460143.1_-_1257046-1257339	0.364007	YES
STM3159_NP_462074.1_-_3320009-3320743	0.361323	YES
STM3262_NP_462175.1_+_3431469-3432242	0.352282	YES
STM3759.S_NP_462658.2_-_3958198-3958986	0.349758	YES
STM0019_NP_459024.1_+_20058-23054	0.349187	YES
STM2969_NP_461889.1_+_3118842-3120206	0.346385	YES
STM0031_NP_459036.1_-_34376-34816	0.345964	YES
STM4331_NP_463195.1_+_4576983-4577354	0.330372	YES
STM3793_NP_462692.1_-_3993591-3994511	0.325053	YES
STM3897_NP_462788.1_-_4105545-4106393	0.322539	YES
STM3217_NP_462131.1_-_3382755-3384275	0.31844	YES
STM1127_NP_460099.1_-_1215275-1216156	0.316419	YES
STM2932_NP_461853.1_-_3071976-3072332	0.314607	YES
STM4583_NP_463439.1_+_4841030-4841356	0.313828	YES
STM2495_NP_461430.1_+_2609474-2609833	0.309281	YES
STM2230.1c_NP_461173.2_-_2330961-2331431	0.298271	YES
STM1563_NP_460522.1_-_1644237-1644668	0.294813	YES
STM1353_NP_460319.1_-_1433552-1434487	0.294588	YES
STM0466_NP_459462.1_-_523957-524346	0.294501	YES
STM1142_NP_460113.1_-_1229728-1230378	0.294058	YES
STM4377_NP_463238.1_+_4619614-4621236	0.291752	YES
STM0874_NP_459851.1_+_945781-946503	0.29046	YES
STM3510_NP_462413.1_+_3668696-3669379	0.289405	YES
STM1372_NP_460337.1_+_1454917-1456188	0.289097	YES
STM2742_NP_461669.1_+_2880444-2881637	0.288511	YES
STM2703_NP_461631.1_+_2851911-2852990	0.283913	YES
STM1701_NP_460660.1_+_1793124-1794104	0.283359	YES
STM2794_NP_461720.1_+_2944452-2945129	0.282119	YES
STM1957_NP_460910.2_-_2045735-2046244	0.281857	YES
STM2125_NP_461070.1_+_2212491-2213843	0.279011	YES
STM1961_NP_460914.1_+_2050820-2051227	0.277921	YES
STM1373_NP_460338.1_+_1456185-1457405	0.272922	YES
STM4119_NP_462999.1_-_4335253-4337904	0.270991	YES
STM3701_NP_462601.1_-_3896036-3896503	0.269624	YES
STM1208_NP_460178.1_+_1291772-1292596	0.261105	YES
STM2079_NP_461024.1_-_2156832-2157815	0.255113	YES
STM1737_NP_460696.1_-_1831260-1831988	0.253562	YES
STM3201_NP_462116.1_-_3364040-3366883	0.249045	YES
STM4523_NP_463382.1_-_4777047-4777379	0.248347	YES
STM3619_NP_462520.1_-_3800842-3803466	0.243145	YES
STM4332_NP_463196.1_-_4577402-4578259	0.242809	YES
STM3660_NP_462560.1_-_3844913-3846367	0.241445	YES
STM0778_NP_459757.1_-_842899-844374	0.240779	YES
STM3306_NP_462216.1_+_3474550-3474837	0.240403	YES
STM0909_NP_459886.1_+_979090-979581	0.239232	YES
STM2289_NP_461231.1_-_2396040-2396843	0.23859	YES
STM4455_NP_463315.1_-_4698357-4699304	0.236789	YES
STM1832_NP_460788.1_+_1930358-1931218	0.234784	YES
STM1998_NP_460949.1_-_2081163-2081582	0.232624	YES
STM4489_NP_463348.1_+_4731963-4735478	0.230165	YES
STM0007_NP_459012.1_+_7665-8618	0.226451	YES
STM4477_NP_463337.1_-_4720448-4721959	0.225787	YES
STM1857_NP_460813.1_-_1955007-1955426	0.224872	YES
STM3414_NP_462318.1_-_3582877-3583260	0.223626	YES
STM1005_NP_459980.1_-_1098228-1099520	0.22356	YES
STM0189_NP_459194.1_+_218309-220783	0.220199	YES
STM3796_NP_462695.1_-_3995917-3997605	0.220122	YES
STM2530_NP_461465.1_-_2662913-2665318	0.216492	YES
STM4268_NP_463133.1_+_4506146-4507495	0.216452	YES
STM1533_NP_460493.1_-_1608903-1609964	0.213554	YES
STM0776_NP_459755.1_-_840581-841597	0.212081	YES
STM0654_NP_459646.1_-_717078-718073	0.209733	YES
STM1573.Sc_NP_460532.2_+_1656345-1656785	0.206698	YES
STM1264_NP_460230.1_+_1346596-1347384	0.204993	YES
STM0162_NP_459167.1_+_191150-192421	0.204837	YES
STM0913_NP_459890.1_-_985463-986134	0.204713	YES
STM0090_NP_459095.1_-_102663-103484	0.204148	YES
STM2015_NP_460960.1_-_2096296-2097225	0.202807	YES
STM2772_NP_461699.1_+_2914842-2915414	0.20088	YES
STM1682_NP_460640.1_+_1775584-1776090	0.199781	YES
STM0299_NP_459297.1_+_342209-342721	0.19978	YES
STM1089_NP_460062.1_+_1177543-1177863	0.197486	YES
STM1731_NP_460690.1_+_1826933-1827811	0.196831	YES
STM2867_NP_461788.1_-_3012107-3012994	0.195727	YES
STM0525_NP_459520.1_+_586699-587847	0.194146	YES
STM0017_NP_459022.1_-_17043-17486	0.193835	YES
STM4181_NP_463046.1_-_4400247-4400684	0.192619	YES
STM2925_NP_461846.1_-_3066549-3067682	0.187594	YES
STM0835_NP_459812.1_+_902271-902744	0.185849	YES
STM2512_NP_461447.1_+_2626079-2627428	0.185233	YES
STM1110_NP_460083.1_-_1197678-1198040	0.184607	YES
STM4106_NP_462987.1_+_4319583-4321763	0.183406	YES
STM0240_NP_459245.1_+_281234-281656	0.179106	YES
STM2315_NP_461257.1_-_2421685-2423466	0.175791	YES
STM2584_NP_461519.1_+_2728976-2730469	0.170131	YES
STM3804_NP_462705.1_-_4006384-4006746	0.169722	YES
STM0325_NP_459321.1_-_369197-369997	0.169251	YES
STM2972_NP_461892.1_+_3123597-3124412	0.169057	YES
STM0141_NP_459146.1_+_164053-165096	0.168961	YES
STM2068_NP_461013.1_-_2145827-2147191	0.168691	YES
STM3902_NP_462793.1_+_4110619-4110879	0.164544	YES
STM0783_NP_459762.1_+_847140-848198	0.163679	YES
STM0929_NP_459906.1_-_1003900-1004271	0.162528	YES
STM3253_NP_462166.1_+_3422605-3423459	0.160383	YES
STM3936_NP_462822.1_-_4143121-4144290	0.159095	YES
STM0369_NP_459364.1_+_418987-420156	0.157868	YES
STM0972_NP_459947.1_+_1054061-1055020	0.157859	YES
STM1022_NP_459997.1_+_1111509-1112306	0.157812	YES
STM2583_NP_461518.1_-_2726772-2728571	0.155895	YES
STM0524_NP_459519.1_+_585378-586676	0.152931	YES
STM4184_NP_463049.1_+_4403672-4404976	0.15248	YES
STM0858_NP_459835.1_+_930332-932017	0.150168	YES
STM1087_NP_460060.1_-_1175548-1176228	0.134746	YES
STM4320_NP_463185.1_+_4565999-4566331	0.133288	YES
STM4539_NP_463398.1_+_4797476-4798537	0.130165	YES
STM3763_NP_462662.1_-_3961542-3964268	0.127714	YES
STM4463_NP_463323.1_-_4705132-4705620	0.12591	YES
STM3907_NP_462798.1_+_4115982-4116323	0.124629	YES
STM2559_NP_461494.1_+_2699950-2702094	0.12338	YES
STM2914_NP_461835.1_-_3057042-3057992	0.122528	YES
STM2859_NP_461780.1_+_3003702-3005780	0.12117	YES
STM0590_NP_459582.1_-_650785-651579	0.118573	YES
STM1233_NP_460203.1_-_1320861-1321508	0.116319	YES
STM1085_NP_460059.1_-_1174268-1174927	0.115721	YES
STM4221_NP_463086.1_+_4440162-4441811	0.110694	YES
STM3297_NP_462208.1_-_3466728-3467354	0.108744	YES
STM2324_NP_461266.1_-_2434651-2435988	0.108607	YES
STM2457_NP_461392.1_-_2566336-2567232	0.108045	YES
STM2918_NP_461839.1_-_3060704-3061627	0.104771	YES
STM2042_NP_460987.1_+_2120322-2120843	0.103722	YES
STM2209.1c_NP_945165.1_-_2310146-2310400	0.0942133	YES
STM4481_NP_463341.1_-_4724731-4725729	0.0941154	YES
STM2390_NP_461332.1_-_2501740-2502024	0.0879004	YES
STM1651_NP_460610.1_+_1742125-1745649	0.0875165	YES
STM0548_NP_459543.1_+_609692-610210	0.0868877	YES
STM3705_NP_462605.1_+_3899118-3900401	0.0860601	YES
STM2654_NP_461589.1_-_2794375-2795676	0.0826854	YES
STM2275_NP_461217.2_+_2379538-2380233	0.0821428	YES
STM1524_NP_460484.1_+_1601183-1602571	0.08072	YES
STM4030.S_NP_462910.2_-_4239649-4240077	0.080705	YES
STM0945_NP_459922.1_+_1022698-1024974	0.0790817	YES
STM1868.1N_NP_945163.1_-_1964512-1964775	0.071123	YES
STM3491_NP_462394.1_-_3645214-3645753	0.0693707	YES
STM0916.1N_NP_945158.1_+_987914-988318	0.068783	YES
STM0686_NP_459671.1_+_747421-749088	0.0623446	YES
STM3084.S_NP_462000.2_-_3247098-3247847	0.06231	YES
STM1791_NP_460747.1_+_1889470-1890318	0.0595479	YES
STM4581_NP_463437.1_-_4837159-4838826	0.0590788	YES
STM0739_NP_459724.1_+_807077-807946	0.0571087	YES
STM2674_NP_461604.1_-_2815261-2816028	0.0533698	YES
STM3333_NP_462243.1_+_3501838-3503091	0.0494743	YES
STM0095_NP_459100.1_-_109331-109990	0.0484754	YES
STM1839_NP_460795.1_-_1936561-1936848	0.0459075	YES
STM3248_NP_462161.1_-_3416453-3417343	0.0423013	YES
STM2542_NP_461477.1_-_2681123-2681509	0.042044	YES
STM1418_NP_460383.1_+_1497708-1498676	0.0417731	YES
STM2652_NP_461587.1_+_2792655-2794010	0.0411374	YES
STM2876_NP_461797.1_+_3019856-3021517	0.0386952	YES
STM4547_NP_463406.1_+_4806117-4806842	0.034291	YES
STM1723_NP_460682.1_+_1818550-1820112	0.0333401	YES
STM3604_NP_462505.1_-_3777236-3778825	0.0332836	YES
STM3251_NP_462164.1_-_3420480-3421427	0.0322296	YES
STM4160_NP_463029.1_-_4378152-4378922	0.0317865	YES
STM1385_NP_460350.1_-_1470433-1471185	0.0317213	YES
STM2927_NP_461848.1_-_3068478-3069239	0.0312124	YES
STM3322_NP_462232.1_+_3486271-3486762	0.0305207	YES
STM3609_NP_462510.1_+_3783052-3784374	0.0280612	YES
STM2696_NP_461624.1_-_2845811-2846296	0.0279919	YES
STM1234.S_NP_460204.2_-_1321589-1322695	0.0276588	YES
STM1826_NP_460782.1_+_1923379-1924743	0.0266045	YES
STM1932_NP_460888.1_+_2027240-2027743	0.0265644	YES
STM4426_NP_463287.1_+_4669016-4670359	0.022047	YES
STM3942_NP_462828.1_+_4150114-4150476	0.0212369	YES
STM2292_NP_461234.1_-_2399433-2400215	0.0210663	YES
STM1970_NP_460923.1_+_2058214-2059209	0.0184048	YES
STM2777_NP_461704.1_-_2923589-2925769	0.0179047	YES
STM2057_NP_461002.1_+_2131440-2132654	0.0167627	YES
STM1410_NP_460375.1_+_1491044-1491592	0.015497	YES
STM4202_NP_463067.1_-_4422817-4423932	0.0143618	YES
STM3038_NP_461954.1_-_3197575-3198333	0.0142735	YES
STM1798_NP_460754.1_+_1897268-1898002	0.0131165	YES
STM0644_NP_459636.1_+_705777-706871	0.0108293	YES
STM2921_NP_461842.1_+_3063182-3063775	0.0074379	YES
STM1971_NP_460924.1_+_2059202-2059909	0.00676409	YES
STM4139_NP_463013.1_-_4358694-4359644	0.00592519	YES
STM2933_NP_461854.1_-_3072350-3072955	0.00572963	YES
STM4131_NP_463010.1_+_4349899-4350750	0.00467205	YES
STM4420_NP_463281.1_-_4663106-4663915	0.0025934	YES
STM0892_NP_459868.1_-_962001-962516	0.00178038	YES
STM2820_NP_461746.1_-_2968990-2969556	0.00130561	YES
STM0621_NP_459613.1_-_683829-685358	0.00108149	YES
STM3697_NP_462597.1_+_3891455-3892651	0.000858708	YES

## Sheet: DT104
Protein	Score	T3S protein or Not
SDT0811__+_890641-892938	1.44974	YES
SDT0289__+_329872-332061	1.35044	YES
SDT1376__+_1469482-1470264	1.26901	YES
SDT1598__+_1701579-1702805	1.25035	YES
SDT1817__-_1932837-1933559	1.12695	YES
SDT2939__+_3121494-3122447	1.09373	YES
SDT2877__-_3063101-3064330	1.03186	YES
SDT1366__+_1461506-1461907	0.986831	YES
SDT1199__-_1290623-1291633	0.985143	YES
SDT2875__-_3059923-3061980	0.947453	YES
SDT2023__-_2121607-2123103	0.945315	YES
SDT1373__+_1467974-1468561	0.870305	YES
SDT4402__-_4740134-4741639	0.860139	YES
SDT0240__+_276025-278166	0.839307	YES
SDT1150__+_1239862-1240560	0.838627	YES
SDT1278__+_1366698-1368041	0.817542	YES
SDT1968__+_2076882-2078285	0.811126	YES
SDT2858__-_3045142-3046050	0.781611	YES
SDT1338__+_1427995-1431051	0.713836	YES
SDT2296__-_2408365-2410731	0.692084	YES
SDT2120__+_2208513-2210861	0.682417	YES
SDT2876__-_3061999-3063030	0.680255	YES
SDT1049__-_1143334-1143843	0.675901	YES
SDT1291__-_1378606-1380858	0.666459	YES
SDT1374__+_1468564-1468980	0.659499	YES
SDT2890__-_3075726-3076844	0.638278	YES
SDT2423__+_2551075-2552076	0.616481	YES
SDT2626__-_2791377-2792105	0.609732	YES
SDT0033__-_34510-34815	0.608792	YES
SDT2515__-_2643022-2644038	0.570372	YES
SDT1372__+_1466504-1467958	0.555905	YES
SDT1028__+_1120931-1121899	0.549498	YES
SDT1013__+_1106982-1109969	0.544928	YES
SDT2030__-_2127128-2128369	0.541461	YES
SDT0031__+_33364-34368	0.541072	YES
SDT1370__+_1465441-1466031	0.523752	YES
SDT1903__+_2014867-2015673	0.505078	YES
SDT2103__+_2192157-2193167	0.497649	YES
SDT1320__-_1406890-1407936	0.493739	YES
SDT2101__+_2191377-2191868	0.488407	YES
SDT2138__-_2230087-2231520	0.485731	YES
SDT1089__-_1180999-1181436	0.485239	YES
SDT0983__-_1086023-1086364	0.480395	YES
SDT2696__-_2854840-2855223	0.473909	YES
SDT1811__+_1926683-1929322	0.462295	YES
SDT3443__+_3645960-3647027	0.450661	YES
SDT2033__-_2130913-2131263	0.43705	YES
SDT0425__+_476240-477352	0.422469	YES
SDT3329__-_3542408-3543199	0.422456	YES
SDT3009__-_3209780-3211198	0.419651	YES
SDT2257__-_2368034-2368897	0.412808	YES
SDT1902__-_2013895-2014896	0.410727	YES
SDT2871__-_3057315-3058946	0.408266	YES
SDT3745__+_3999567-4000469	0.403048	YES
SDT2695__+_2854191-2854778	0.402064	YES
SDT3626__+_3866714-3867343	0.391422	YES
SDT2878__-_3064358-3066139	0.384986	YES
SDT1823__+_1937033-1937308	0.381741	YES
SDT1824__+_1937033-1937308	0.381741	YES
SDT2796__+_2981591-2982118	0.374031	YES
SDT1113__-_1208803-1209549	0.368601	YES
SDT0507__-_562781-563170	0.362984	YES
SDT4317__+_4653178-4653549	0.362945	YES
SDT1969__+_2078300-2078707	0.356464	YES
SDT2543__+_2677664-2678023	0.353565	YES
SDT2966__+_3157576-3158391	0.347092	YES
SDT2739__+_2915685-2916878	0.334451	YES
SDT2624__-_2790254-2790634	0.32517	YES
SDT2219__-_2325617-2326564	0.320293	YES
SDT3773__-_4027466-4028386	0.316745	YES
SDT3490__+_3702055-3702738	0.316604	YES
SDT2926__-_3107220-3107576	0.314607	YES
SDT4506__-_4853244-4853576	0.303921	YES
SDT2852__+_3038946-3041024	0.294416	YES
SDT3091__-_3292386-3293072	0.294062	YES
SDT4318__-_4653597-4654454	0.293299	YES
SDT3909__-_4181851-4182699	0.28846	YES
SDT2181__+_2280146-2281498	0.283536	YES
SDT4358__+_4695808-4697430	0.281233	YES
SDT1569__+_1672467-1673417	0.280642	YES
SDT3841__-_4100036-4101001	0.27988	YES
SDT2126__+_2217560-2218864	0.274028	YES
SDT1797__+_1911183-1912043	0.271607	YES
SDT1158__+_1247923-1248876	0.270107	YES
SDT2473__-_2604249-2605175	0.266139	YES
SDT2522__+_2650009-2650959	0.264357	YES
SDT1060__+_1153706-1154485	0.264292	YES
SDT0019__+_20058-23054	0.254253	YES
SDT3456__+_3659381-3659707	0.253489	YES
SDT1068__-_1159191-1160876	0.253259	YES
SDT3743__-_3995417-3998143	0.252815	YES
SDT3253__+_3464729-3465502	0.24412	YES
SDT2860__-_3047351-3048238	0.24069	YES
SDT1850__-_1960229-1960939	0.235317	YES
SDT1842__-_1952441-1953097	0.23468	YES
SDT1984__+_2091015-2092019	0.232898	YES
SDT2963__+_3152821-3154185	0.230107	YES
SDT1327__-_1415044-1415979	0.229937	YES
SDT4471__+_4808160-4811675	0.229737	YES
SDT0168__+_191154-192425	0.225811	YES
SDT3209__-_3416015-3417535	0.223523	YES
SDT1713__+_1821592-1821906	0.223501	YES
SDT3870__+_4132658-4133413	0.222711	YES
SDT2534__-_2668589-2669452	0.220666	YES
SDT4109__+_4396493-4398673	0.219865	YES
SDT0258__+_298239-299018	0.216023	YES
SDT1087__-_1178638-1179000	0.210403	YES
SDT2005__-_2108643-2109062	0.21025	YES
SDT0290__+_332085-332531	0.210079	YES
SDT3295__+_3507811-3508098	0.205253	YES
SDT2710__+_2876601-2876939	0.205202	YES
SDT3594__-_3824878-3826797	0.202734	YES
SDT3639__-_3878788-3880242	0.202347	YES
SDT1529__-_1624522-1624953	0.194979	YES
SDT4256__+_4583053-4584402	0.194782	YES
SDT3918__+_4192288-4192629	0.192541	YES
SDT3776__-_4029792-4031480	0.190975	YES
SDT0326__-_366645-366995	0.188068	YES
SDT0975__-_1079201-1080493	0.182559	YES
SDT3842__+_4101094-4101429	0.180043	YES
SDT0017__-_17043-17486	0.173916	YES
SDT3598__-_3834006-3836630	0.172762	YES
SDT1931__-_2042236-2044128	0.171844	YES
SDT2343__-_2463520-2464323	0.170121	YES
SDT4150__-_4455058-4455828	0.170057	YES
SDT2792__+_2979693-2980370	0.168534	YES
SDT0246__+_281237-281659	0.168042	YES
SDT0364__-_407306-408106	0.165765	YES
SDT1703__-_1811545-1812273	0.165685	YES
SDT3303__+_3513274-3514209	0.162172	YES
SDT2045__-_2138239-2138763	0.161997	YES
SDT1425__-_1512018-1513076	0.158625	YES
SDT0794__+_870836-871894	0.157875	YES
SDT1102__-_1196236-1197117	0.15592	YES
SDT1183__+_1272551-1273375	0.153435	YES
SDT2069__-_2163239-2164168	0.152131	YES
SDT2163__-_2259019-2259318	0.148659	YES
SDT2630__-_2794964-2796763	0.145813	YES
SDT4167__-_4477152-4477589	0.143965	YES
SDT2578__-_2731104-2733509	0.135392	YES
SDT3716__-_3962309-3963166	0.135155	YES
SDT1066__+_1158503-1158823	0.132841	YES
SDT0941__+_1035035-1035994	0.129449	YES
SDT2869__+_3055100-3056761	0.128417	YES
SDT4121__-_4412163-4414814	0.126366	YES
SDT0787__-_864277-865293	0.125633	YES
SDT0147__+_164057-165100	0.122091	YES
SDT0366__+_408322-408738	0.121338	YES
SDT2676__-_2836139-2837332	0.120885	YES
SDT1596__+_1699907-1700308	0.120276	YES
SDT2047__-_2139759-2140967	0.120012	YES
SDT4437__-_4774554-4775501	0.116715	YES
SDT3943__-_4219427-4220596	0.108306	YES
SDT2954__-_3144518-3145858	0.106889	YES
SDT2442__-_2569220-2569504	0.106804	YES
SDT0409__+_457098-458267	0.106471	YES
SDT2122__-_2212770-2214134	0.104894	YES
SDT3397__-_3616202-3616585	0.104394	YES
SDT1172__+_1261250-1262455	0.103735	YES
SDT1862__-_1973019-1974440	0.101196	YES
SDT2560__+_2694269-2695618	0.0995225	YES
SDT4225__+_4536942-4538267	0.0984267	YES
SDT1209__-_1301641-1302288	0.0980569	YES
SDT2770__-_2950355-2950927	0.0971686	YES
SDT2607__+_2768142-2770286	0.0943091	YES
SDT1346__+_1437676-1438896	0.0931718	YES
SDT1377__+_1470261-1470950	0.0931261	YES
SDT2368__-_2489165-2490946	0.0928326	YES
SDT2053__+_2145787-2146320	0.0863563	YES
SDT1821__-_1935832-1936251	0.0830363	YES
SDT0095__-_102666-103487	0.0823601	YES
SDT1252__+_1337881-1338327	0.0818847	YES
SDT2133__-_2223775-2224758	0.0807793	YES
SDT3194__-_3397300-3400143	0.0766332	YES
SDT1236__+_1327376-1328164	0.0759011	YES
SDT3151__-_3353267-3354001	0.0706067	YES
SDT4551__-_4902664-4903914	0.0683299	YES
SDT3786__-_4040259-4040621	0.0681446	YES
SDT1099__-_1188557-1192519	0.06769	YES
SDT1858__-_1968942-1969424	0.0672219	YES
SDT2096__+_2187265-2187786	0.062616	YES
SDT2631__+_2797168-2798661	0.0602968	YES
SDT0994__+_1092482-1093279	0.0597867	YES
SDT2818__-_3004231-3004797	0.0576555	YES
SDT1064__-_1156508-1157188	0.0542855	YES
SDT3244__+_3455865-3456719	0.0468184	YES
SDT0746__-_818622-819584	0.0466121	YES
SDT0789__-_866595-868070	0.0452744	YES
SDT1116__-_1210506-1211156	0.0393855	YES
SDT3806__-_4059207-4060247	0.0355932	YES
SDT4522__+_4873673-4874734	0.0328262	YES
SDT2038__-_2133380-2133766	0.0315358	YES
SDT4530__+_4882314-4883039	0.029937	YES
SDT2915__+_3098426-3099019	0.0282568	YES
SDT0492__+_544364-546718	0.0267901	YES
SDT1697__+_1807218-1808096	0.0237127	YES
SDT3942__-_4218228-4219367	0.0228203	YES
SDT3676__+_3925330-3926526	0.0222918	YES
SDT2110__+_2198383-2199597	0.0177178	YES
SDT2194__-_2300771-2301124	0.016224	YES
SDT1834__-_1945337-1945600	0.0161542	YES
SDT1523__+_1615030-1616232	0.016104	YES
SDT4460__-_4796645-4798156	0.0157661	YES
SDT2376__-_2502131-2503468	0.0130034	YES
SDT0100__-_109334-109993	0.00951015	YES
SDT2912__-_3095948-3096871	0.00843499	YES
SDT0282__+_321110-322414	0.00840233	YES
SDT0845__+_925968-926441	0.00821624	YES
SDT0846__+_925968-926441	0.00821624	YES
SDT0008__+_8729-9319	0.00586261	YES

## Sheet: CT18
Protein	Score	T3S protein or Not
STY1718_NP_456126.1_-_1639257-1639673	1.47595	YES
STY3189_NP_457432.1_-_3055153-3055644	1.29004	YES
STY0319_NP_454896.1_+_328636-330825	1.2739	YES
STY4609_NP_458691.1_+_4481801-4482523	1.21407	YES
STY3007_NP_457278.1_-_2879857-2881086	1.20033	YES
STY2168_NP_456521.1_+_2012950-2014353	1.16187	YES
STY1215_NP_455669.1_+_1169358-1170056	1.1466	YES
STY1264_NP_455716.1_-_1219329-1220339	1.14603	YES
STY1413_NP_455850.1_+_1363893-1365452	1.11825	YES
STY3073_NP_457334.1_+_2935978-2936931	1.04202	YES
STY1716_NP_456124.1_-_1637973-1638755	0.995234	YES
STY1808_NP_456206.1_-_1725993-1727336	0.977273	YES
STY1629_NP_456040.1_+_1561381-1563846	0.959037	YES
STY1719_NP_456127.1_-_1639676-1640263	0.936491	YES
STY2710_NP_457007.1_+_2542737-2543687	0.926096	YES
STY0259_NP_454842.1_+_273613-275754	0.914826	YES
STY1758_NP_456159.1_-_1676888-1679944	0.892566	YES
STY3005_NP_457276.1_-_2876689-2878746	0.883621	YES
STY3240_NP_457479.1_-_3104611-3106587	0.847444	YES
STY1121_NP_455588.1_-_1088687-1090372	0.826378	YES
STY0038_NP_454642.1_-_34511-34816	0.801135	YES
STY1092_NP_455569.1_-_1071410-1071919	0.790401	YES
STY2602_NP_456913.1_+_2438615-2439616	0.787385	YES
STY1462_NP_455895.1_-_1412563-1413513	0.772848	YES
STY0418_NP_454980.1_+_429630-430742	0.759304	YES
STY2292_NP_456631.1_-_2119214-2120647	0.688438	YES
STY2467_NP_456787.1_-_2297837-2300203	0.683075	YES
STY2345_NP_456678.1_+_2183491-2183793	0.668185	YES
STY3001_NP_457272.1_-_2874081-2875712	0.662363	YES
STY3688_NP_457879.1_+_3536323-3536682	0.657667	YES
STY2889_NP_457172.1_-_2768199-2768771	0.646132	YES
STY1708_NP_456116.1_-_1633485-1634477	0.622671	YES
STY2825_NP_457108.1_-_2687272-2688000	0.619169	YES
STY2436_NP_456759.1_-_2266905-2267768	0.618279	YES
STY0036_NP_454641.1_+_33368-34363	0.606078	YES
STY2660_NP_456961.1_-_2497378-2498304	0.598964	YES
STY1793_NP_456193.1_+_1713175-1715427	0.592973	YES
STY2839_NP_457121.1_-_2701506-2701889	0.585987	YES
STY2702_NP_457000.1_-_2535756-2536772	0.576787	YES
STY4659_NP_458738.1_-_4519050-4521545	0.572911	YES
STY1720_NP_456128.1_-_1640279-1641733	0.571041	YES
STY1722_NP_456130.1_-_1642206-1642796	0.564685	YES
STY3160_NP_457411.1_-_3032758-3034173	0.564621	YES
STY4321_NP_458427.1_-_4203167-4203493	0.563402	YES
STY4850_NP_458919.1_-_4710186-4712723	0.561464	YES
STY3020_NP_457291.1_-_2892482-2893600	0.556753	YES
STY3764_NP_457949.1_-_3627061-3628320	0.548288	YES
STY1715_NP_456123.1_-_1637287-1637976	0.538609	YES
STY3006_NP_457277.1_-_2878765-2879787	0.537492	YES
STY4547_NP_458635.1_+_4431907-4432542	0.533432	YES
STY2253_NP_456598.1_+_2081209-2081700	0.529324	YES
STY2255_NP_456599.1_+_2081988-2082998	0.499341	YES
STY2918_NP_457196.1_+_2799245-2799772	0.483723	YES
STY1763_NP_456164.1_+_1686242-1687288	0.483086	YES
STY2393_NP_456723.1_-_2223544-2224491	0.470479	YES
STY1277_NP_455729.1_-_1233033-1233698	0.459856	YES
STY0035_NP_454640.1_-_32549-32998	0.4497	YES
STY1980_NP_456354.1_+_1867456-1870095	0.447476	YES
STY3251_NP_457490.1_-_3114814-3115500	0.444088	YES
STY3521_NP_457718.1_-_3363658-3364449	0.442647	YES
STY3008_NP_457279.1_-_2881114-2882895	0.440554	YES
STY2005_NP_456370.1_+_1885617-1886747	0.428831	YES
STY1058_NP_455536.1_+_1037612-1038757	0.428638	YES
STY2823_NP_457106.1_-_2686149-2686529	0.428021	YES
STY1106_NP_455579.1_-_1079782-1080993	0.41827	YES
STY2184_NP_456537.1_+_2027153-2028157	0.416743	YES
STY1666_NP_456074.1_+_1595392-1596450	0.412801	YES
STY4021_NP_458169.1_-_3882205-3883107	0.405848	YES
STY1034_NP_455513.1_+_1022132-1022734	0.400556	YES
STY0279_NP_454861.1_+_296065-296844	0.399601	YES
STY3098_NP_457356.1_-_2966078-2967418	0.398212	YES
STY3050_NP_457314.1_-_2916132-2917253	0.396508	YES
STY0320_NP_454897.1_+_330849-331295	0.388908	YES
STY2167_NP_456520.1_-_2011173-2012693	0.382723	YES
STY2853_NP_457135.1_+_2723548-2723886	0.380982	YES
STY3934_NP_458097.1_-_3797363-3798118	0.376477	YES
STY4614_NP_458696.1_-_4486244-4486603	0.374151	YES
STY3380_NP_457592.1_-_3221541-3224384	0.36171	YES
STY3332_NP_457552.1_-_3175691-3176425	0.361323	YES
STY3395_NP_457607.1_-_3240258-3241778	0.361199	YES
STY2724_NP_457020.1_-_2561420-2562283	0.353909	YES
STY3445_NP_457646.1_+_3288627-3289400	0.352282	YES
STY4651_NP_458730.1_-_4510583-4512553	0.345605	YES
STY1248_NP_455700.1_+_1201437-1202261	0.342633	YES
STY1223_NP_455677.1_+_1177419-1178372	0.340042	YES
STY4691_NP_458770.1_+_4553477-4553848	0.330372	YES
STY1211_NP_455665.1_-_1167321-1167614	0.328462	YES
STY3989_NP_458144.1_+_3854206-3855126	0.325053	YES
STY1163_NP_455621.1_-_1125366-1126247	0.324776	YES
STY4571_NP_458656.1_+_4449482-4449925	0.318771	YES
STY3057_NP_457321.1_-_2921547-2921903	0.314607	YES
STY4930_NP_458991.1_+_4792824-4793150	0.313828	YES
STY2736_NP_457030.1_+_2573190-2573549	0.312944	YES
STY1053_NP_455531.1_+_1035345-1035770	0.31164	YES
STY0936_NP_455430.1_-_929214-930164	0.311274	YES
STY1351_NP_455796.1_-_1311666-1312586	0.305295	YES
STY4594_NP_458678.1_+_4470678-4471577	0.301455	YES
STY2519_NP_456832.1_-_2353637-2354440	0.300802	YES
STY3986_NP_458141.1_+_3851123-3852811	0.29531	YES
STY1497_NP_455927.1_+_1454503-1454934	0.294813	YES
STY2838_NP_457120.1_+_2700857-2701444	0.294617	YES
STY0510_NP_455064.1_-_516818-517207	0.294501	YES
STY1179_NP_455636.1_-_1140027-1140653	0.294058	YES
STY3108_NP_457364.1_+_2974380-2975744	0.2929	YES
STY4733_NP_458811.1_+_4595156-4596778	0.291752	YES
STY0907_NP_455401.1_+_900194-900916	0.29046	YES
STY2281_NP_456620.1_+_2107398-2108702	0.287484	YES
STY4563_NP_458649.1_+_4444208-4444966	0.285319	YES
STY2914_NP_457193.1_+_2797347-2798024	0.282119	YES
STY2338_NP_456671.1_+_2170454-2171806	0.279011	YES
STY2169_NP_456522.1_+_2014368-2014775	0.277921	YES
STY0184_NP_454775.1_+_193338-194609	0.276678	YES
STY2040_NP_456400.1_-_1909704-1911107	0.276224	YES
STY1750_NP_456151.1_-_1669043-1670263	0.272922	YES
STY3754_NP_457940.1_+_3613296-3615947	0.270991	YES
STY4094_NP_458226.1_+_3952633-3953100	0.269624	YES
STY3679_NP_457870.1_+_3532467-3532994	0.26948	YES
STY1991_NP_456362.1_-_1876603-1877022	0.250413	YES
STY4650_NP_458729.1_+_4509535-4510281	0.249498	YES
STY4138_NP_458267.1_+_4002503-4003957	0.24562	YES
STY4181_NP_458301.1_+_4039950-4042574	0.243145	YES
STY1320_NP_455767.1_-_1277897-1278775	0.23396	YES
STY4286_NP_458394.1_-_4161200-4161883	0.231832	YES
STY4572_NP_458657.1_+_4449922-4450341	0.231429	YES
STY1159_NP_455618.1_-_1117687-1121649	0.22653	YES
STY0007_NP_454617.1_+_7665-8618	0.226451	YES
STY4816_NP_458895.1_-_4676536-4678047	0.225787	YES
STY4795_NP_458873.1_-_4654435-4655382	0.224878	YES
STY4384_NP_458486.1_+_4246242-4246625	0.223626	YES
STY3485_NP_457685.1_+_3329075-3329362	0.219413	YES
STY1047_NP_455525.1_+_1029169-1030572	0.217854	YES
STY0341_NP_454910.1_+_348682-349626	0.217459	YES
STY4466_NP_458566.1_+_4351271-4352620	0.216452	YES
STY2847_NP_457129.1_-_2709975-2711276	0.213879	YES
STY1530_NP_455951.1_+_1485050-1486111	0.213554	YES
STY2206_NP_456557.1_-_2044752-2045171	0.208214	YES
STY1751_NP_456152.1_-_1670260-1671531	0.207832	YES
STY1638_NP_456049.1_+_1568680-1569705	0.206422	YES
STY0105_NP_454702.1_-_102467-103288	0.204148	YES
STY2218_NP_456569.1_-_2053027-2053956	0.202807	YES
STY4665_NP_458744.1_+_4527028-4528617	0.200737	YES
STY1508_NP_455936.1_-_1466582-1467202	0.194663	YES
STY0573_NP_455117.1_+_579922-581070	0.194146	YES
STY0017_NP_454627.1_-_17049-17492	0.193835	YES
STY1616_NP_456027.1_+_1551982-1553478	0.189247	YES
STY0876_NP_455371.1_+_866783-867256	0.185849	YES
STY2753_NP_457046.1_+_2590945-2592294	0.185233	YES
STY3760_NP_457945.1_-_3621018-3623198	0.183406	YES
STY4692_NP_458771.1_-_4553896-4554753	0.182117	YES
STY4801_NP_458880.1_-_4661211-4661699	0.180545	YES
STY0265_NP_454848.1_+_278825-279247	0.179106	YES
STY1314_NP_455761.1_+_1273721-1274449	0.172907	YES
STY3115_NP_457370.1_+_2982410-2983726	0.171077	YES
STY3111_NP_457367.1_+_2979135-2979950	0.169057	YES
STY3194_NP_457436.1_-_3060097-3060849	0.168755	YES
STY2277_NP_456615.1_-_2102617-2103981	0.168691	YES
STY0811_NP_455320.1_-_807495-808970	0.167245	YES
STY3650_NP_457841.1_-_3507263-3507604	0.16518	YES
STY3655_NP_457846.1_-_3512700-3512960	0.164544	YES
STY3435_NP_457638.1_+_3279763-3280617	0.160383	YES
STY1381_NP_455822.1_-_1334414-1334920	0.158652	YES
STY0401_NP_454964.1_+_410564-411733	0.157868	YES
STY1036_NP_455515.1_+_1023687-1024484	0.157812	YES
STY2829_NP_457112.1_-_2690859-2692658	0.155895	YES
STY4399_NP_458501.1_-_4262945-4263382	0.154709	YES
STY0572_NP_455116.1_+_578601-579899	0.152931	YES
STY0809_NP_455318.1_-_805177-806193	0.150745	YES
STY1857_NP_456247.1_-_1766581-1767369	0.150439	YES
STY0782_NP_455295.1_+_781859-782728	0.148441	YES
STY2988_NP_457261.1_-_2864110-2864997	0.147519	YES
STY0163_NP_454755.1_+_167200-168243	0.14711	YES
STY3975_NP_458133.1_+_3841982-3842344	0.145652	YES
STY1115_NP_455585.1_-_1086003-1086683	0.1369	YES
STY4580_NP_458665.1_-_4458133-4458522	0.133895	YES
STY0286_NP_454868.1_-_302488-303120	0.132498	YES
STY1228_NP_455682.1_-_1184161-1184745	0.132267	YES
STY3208_NP_457450.1_-_3073310-3074149	0.130844	YES
STY0595_NP_455137.1_+_601650-602168	0.127168	YES
STY2806_NP_457089.1_+_2664037-2666181	0.12338	YES
STY1112_NP_455583.1_-_1084014-1084673	0.122161	YES
STY4544_NP_458632.1_+_4428630-4429100	0.122033	YES
STY2981_NP_457253.1_+_2856596-2858674	0.12117	YES
STY0634_NP_455166.1_-_634904-635698	0.118573	YES
STY1273_NP_455725.1_-_1230346-1230993	0.116319	YES
STY2247_NP_456592.1_+_2076899-2077420	0.115708	YES
STY2050_NP_456410.1_-_1915387-1915941	0.112161	YES
STY3451_NP_457652.1_-_3294153-3294788	0.111925	YES
STY2694_NP_456992.1_-_2526551-2527447	0.11151	YES
STY4417_NP_458519.1_+_4285286-4286935	0.110694	YES
STY3976_NP_458134.1_+_3842341-3842871	0.110657	YES
STY0307_NP_454887.1_+_319800-320294	0.109761	YES
STY3039_NP_457305.1_-_2907509-2908459	0.109298	YES
STY3475_NP_457676.1_-_3321251-3321877	0.108744	YES
STY2554_NP_456866.1_-_2389676-2391013	0.108607	YES
STY4402_NP_458504.1_+_4266370-4267674	0.103572	YES
STY4602_NP_458685.1_-_4475820-4476305	0.102608	YES
STY3433_NP_457637.1_-_3277638-3278585	0.0971585	YES
STY2029_NP_456389.1_-_1901514-1902659	0.0941893	YES
STY4819_NP_458898.1_-_4680830-4681828	0.0941154	YES
STY2622_NP_456931.1_-_2456709-2456993	0.0879004	YES
STY1419_NP_455854.1_-_1368017-1371541	0.0875165	YES
STY1536_NP_455956.1_-_1490098-1491225	0.08072	YES
STY0943_NP_455435.1_+_934397-936673	0.0790817	YES
STY4654_NP_458733.1_-_4514621-4515415	0.0770543	YES
STY0802_NP_455312.1_+_799013-800092	0.0764143	YES
STY4036_NP_458175.1_-_3896540-3897523	0.0687432	YES
STY0816_NP_455325.1_+_811736-812794	0.0644544	YES
STY2535_NP_456848.1_-_2369264-2370631	0.0641451	YES
STY4481_NP_458581.1_+_4367185-4367805	0.0625748	YES
STY0724_NP_455247.1_+_723401-725068	0.0623446	YES
STY1918_NP_456300.1_+_1811072-1811920	0.0595479	YES
STY2288_NP_456627.1_-_2113613-2114596	0.059359	YES
STY4928_NP_458989.1_-_4788953-4790620	0.0590788	YES
STY2446_NP_456768.1_+_2276572-2276976	0.0586635	YES
STY4090_NP_458222.1_-_3948736-3950019	0.0560851	YES
STY0925_NP_455419.1_-_916424-916939	0.0545828	YES
STY2861_NP_457144.1_-_2731141-2731908	0.0533698	YES
STY3192_NP_457434.1_-_3057550-3058080	0.050303	YES
STY2999_NP_457270.1_+_2871866-2873527	0.0499165	YES
STY2300_NP_456639.1_-_2128914-2130227	0.0495635	YES
STY0110_NP_454707.1_-_109129-109788	0.0484754	YES
STY1533_NP_455953.1_+_1487971-1488513	0.0478923	YES
STY1969_NP_456345.1_-_1858166-1858453	0.0459075	YES
STY4023_NP_458171.1_+_3884528-3887254	0.0455266	YES
STY4257_NP_458365.1_+_4121171-4122241	0.0450136	YES
STY3623_NP_457815.1_+_3476682-3477851	0.0438613	YES
STY4305_NP_458413.1_+_4184842-4185381	0.0428261	YES
STY2788_NP_457073.1_-_2645152-2645538	0.042044	YES
STY2845_NP_457127.1_+_2708255-2709610	0.0411374	YES
STY2894_NP_457177.1_-_2776664-2778844	0.0393757	YES
STY2756_NP_457047.1_-_2597945-2599525	0.0388762	YES
STY4901_NP_458963.1_+_4763416-4764042	0.0351951	YES
STY4199_NP_458315.1_+_4064592-4066181	0.0332836	YES
STY4603_NP_458686.1_-_4476305-4479085	0.0328845	YES
STY1736_NP_456142.1_+_1655478-1656230	0.0317213	YES
STY3052_NP_457316.1_-_2918049-2918810	0.0312124	YES
STY1328_NP_455775.1_-_1285596-1287158	0.030872	YES
STY3501_NP_457701.1_+_3340797-3341288	0.0305207	YES
STY4548_NP_458636.1_+_4432552-4433028	0.0304925	YES
STY4194_NP_458310.1_-_4059043-4060365	0.0280612	YES
STY2522_NP_456835.1_-_2357030-2357812	0.028054	YES
STY4099_NP_458229.1_-_3956485-3957681	0.0277317	YES
STY1274_NP_455726.1_-_1231074-1232180	0.0276588	YES
STY1990_NP_456361.1_+_1875739-1876215	0.0269306	YES
STY1956_NP_456333.1_+_1844980-1846344	0.0266045	YES
STY2141_NP_456497.1_+_1992209-1992712	0.0265644	YES
STY3345_NP_457563.1_-_3189433-3190416	0.022031	YES
STY0465_NP_455020.1_-_471575-472366	0.0202901	YES
STY1045_NP_455523.1_+_1028101-1028361	0.0199798	YES
STY4669_NP_458748.1_-_4531179-4531631	0.0198672	YES
STY4675_NP_458754.1_-_4537926-4538252	0.0189438	YES
STY2178_NP_456531.1_+_2021820-2022815	0.0184048	YES
STY2883_NP_457166.1_-_2762316-2762801	0.0174406	YES
STY3701_NP_457892.1_+_3547084-3547569	0.0174406	YES
STY3725_NP_457914.1_+_3573612-3574382	0.0173347	YES
STY2262_NP_456606.1_+_2088214-2089428	0.0167627	YES
STY1702_NP_456110.1_-_1628054-1629022	0.016739	YES
STY1371_NP_455813.1_+_1327374-1328042	0.0149773	YES
STY0695_NP_455220.1_+_690526-691620	0.0108293	YES
STY4100_NP_458230.1_+_3957949-3959004	0.0104558	YES
STY0670_NP_455198.1_-_668594-670123	0.00681314	YES
STY2100_NP_456459.1_+_1953078-1953833	0.0066221	YES
STY3740_NP_457926.1_+_3591565-3592515	0.00592519	YES
STY3058_NP_457322.1_-_2921921-2922526	0.00572963	YES
STY4856_NP_458925.1_-_4719101-4720729	0.0053451	YES
STY1472_NP_455903.1_-_1424467-1425666	0.00267728	YES
STY2946_NP_457218.1_-_2821885-2822451	0.00130561	YES

## Sheet: Ty2
Protein	Score	T3S protein or Not
t1270_NP_805073.1_+_1341463-1341879	1.47595	YES
t2571_NP_806290.1_-_2650288-2652477	1.2739	YES
t4303_NP_807899.1_+_4465393-4466115	1.21407	YES
t2786_NP_806487.1_-_2865714-2866943	1.20033	YES
t0917_NP_804746.1_-_1012128-1013531	1.16187	YES
t1744_NP_805519.1_-_1811127-1811825	1.1466	YES
t1696_NP_805472.1_+_1760844-1761854	1.14603	YES
t1557_NP_805340.1_-_1615730-1617289	1.11825	YES
t2846_NP_806543.1_+_2921872-2922825	1.04202	YES
t1272_NP_805075.1_+_1342381-1343163	0.995234	YES
t1185_NP_804992.1_+_1253794-1255137	0.977273	YES
t1359_NP_805155.1_-_1416819-1419284	0.959037	YES
t1269_NP_805072.1_+_1340873-1341460	0.936491	YES
t0236_NP_804116.1_+_273604-275745	0.914826	YES
t0386_NP_804255.1_-_461026-461976	0.898446	YES
t1233_NP_805039.1_+_1301186-1304242	0.892566	YES
t2784_NP_806485.1_-_2862546-2864603	0.883621	YES
t2999_NP_806691.1_-_3090106-3092082	0.847444	YES
t1828_NP_805600.1_+_1890441-1892126	0.826378	YES
t0033_NP_803917.1_-_34511-34816	0.801135	YES
t1849_NP_805618.1_+_1908894-1909403	0.790401	YES
t0493_NP_804350.1_-_565096-566097	0.787385	YES
t1511_NP_805297.1_+_1567668-1568618	0.772848	YES
t2479_NP_806207.1_-_2550371-2551483	0.759304	YES
t0790_NP_804632.1_+_883281-884714	0.688438	YES
t0623_NP_804477.1_+_704510-706876	0.683075	YES
t0740_NP_804584.1_-_820143-820445	0.668185	YES
t2780_NP_806481.1_-_2859938-2861569	0.662363	YES
t3430_NP_807093.1_+_3521983-3522342	0.657667	YES
t2667_NP_806378.1_-_2754056-2754628	0.646132	YES
t1280_NP_805083.1_+_1346659-1347651	0.622671	YES
t0278_NP_804154.1_+_316849-317577	0.619169	YES
t0654_NP_804506.1_+_736946-737809	0.618279	YES
t0032_NP_803916.1_+_33368-34363	0.606078	YES
t0433_NP_804302.1_+_506407-507333	0.598964	YES
t1198_NP_805005.1_-_1265703-1267955	0.592973	YES
t0264_NP_804141.1_+_302960-303343	0.585987	YES
t0393_NP_804262.1_+_467940-468956	0.576787	YES
t4350_NP_807943.1_-_4501859-4504354	0.572911	YES
t1268_NP_805071.1_+_1339403-1340857	0.571041	YES
t1266_NP_805069.1_+_1338340-1338930	0.564685	YES
t2926_NP_806620.1_-_3018653-3020068	0.564621	YES
t4030_NP_807639.1_-_4187814-4188140	0.563402	YES
t4544_NP_808122.1_-_4693110-4695647	0.561464	YES
t2799_NP_806500.1_-_2878339-2879457	0.556753	YES
t3514_NP_807162.1_-_3612721-3613980	0.548288	YES
t1273_NP_805076.1_+_1343160-1343849	0.538609	YES
t2785_NP_806486.1_-_2864622-2865644	0.537492	YES
t4247_NP_807846.1_+_4416557-4417192	0.533432	YES
t0826_NP_804665.1_-_922228-922719	0.529324	YES
t0824_NP_804664.1_-_920930-921940	0.499341	YES
t2693_NP_806401.1_+_2785102-2785629	0.483723	YES
t1228_NP_805034.1_-_1293842-1294888	0.483086	YES
t0691_NP_804540.1_+_779446-780393	0.470479	YES
t1683_NP_805459.1_+_1747485-1748150	0.459856	YES
t0031_NP_803915.1_-_32549-32998	0.4497	YES
t1029_NP_804847.1_-_1111037-1113676	0.447476	YES
t3010_NP_806702.1_-_3100309-3100995	0.444088	YES
t3257_NP_806932.1_-_3349152-3349943	0.442647	YES
t2787_NP_806488.1_-_2866971-2868752	0.440554	YES
t1011_NP_804831.1_-_1094385-1095515	0.428831	YES
t0280_NP_804156.1_+_318320-318700	0.428021	YES
t0901_NP_804730.1_-_998331-999335	0.416743	YES
t1324_NP_805125.1_-_1384686-1385744	0.412801	YES
t3753_NP_807383.1_-_3867695-3868597	0.405848	YES
t1906_NP_805674.1_-_1958343-1958945	0.400556	YES
t2607_NP_806323.1_-_2683237-2684016	0.399601	YES
t2869_NP_806565.1_-_2951973-2953313	0.398212	YES
t2826_NP_806523.1_-_2901991-2903112	0.396508	YES
t2570_NP_806289.1_-_2649818-2650264	0.388908	YES
t0918_NP_804747.1_+_1013788-1015308	0.382723	YES
t2620_NP_806331.1_+_2698772-2699110	0.380982	YES
t3674_NP_807310.1_-_3782854-3783609	0.376477	YES
t4308_NP_807904.1_-_4469836-4470195	0.374151	YES
t3121_NP_806804.1_-_3207036-3209879	0.36171	YES
t3079_NP_806764.1_-_3161186-3161920	0.361323	YES
t3137_NP_806819.1_-_3225753-3227273	0.361199	YES
t0373_NP_804242.1_+_442566-443429	0.353909	YES
t3182_NP_806860.1_+_3274122-3274895	0.352282	YES
t4344_NP_807937.1_-_4494169-4496139	0.345605	YES
t1712_NP_805488.1_-_1778922-1779746	0.342633	YES
t1736_NP_805511.1_-_1802811-1803764	0.340042	YES
t4383_NP_807974.1_+_4536379-4536750	0.330372	YES
t1748_NP_805523.1_+_1813569-1813862	0.328462	YES
t3725_NP_807358.1_+_3839696-3840616	0.325053	YES
t1794_NP_805567.1_+_1854566-1855447	0.324776	YES
t4267_NP_807866.1_+_4434132-4434575	0.318771	YES
t2833_NP_806530.1_-_2907406-2907762	0.314607	YES
t4622_NP_808194.1_+_4775748-4776074	0.313828	YES
t0362_NP_804232.1_-_431300-431659	0.312944	YES
t1993_NP_805756.1_+_2050913-2051863	0.311274	YES
t1614_NP_805392.1_+_1668597-1669517	0.305295	YES
t4288_NP_807886.1_+_4454271-4455170	0.301455	YES
t0574_NP_804431.1_+_650272-651075	0.300802	YES
t3722_NP_807355.1_+_3836613-3838301	0.29531	YES
t1478_NP_805267.1_-_1526991-1527422	0.294813	YES
t0265_NP_804142.1_-_303405-303992	0.294617	YES
t2393_NP_806123.1_+_2463894-2464283	0.294501	YES
t1778_NP_805552.1_+_1840530-1841156	0.294058	YES
t2877_NP_806573.1_+_2960275-2961639	0.2929	YES
t4428_NP_808015.1_+_4578060-4579682	0.291752	YES
t2022_NP_805785.1_-_2080161-2080883	0.29046	YES
t0801_NP_804643.1_-_895226-896530	0.287484	YES
t4261_NP_807859.1_+_4428858-4429616	0.285319	YES
t2689_NP_806398.1_+_2783204-2783881	0.282119	YES
t0747_NP_804591.1_-_832130-833482	0.279011	YES
t0916_NP_804745.1_-_1011706-1012113	0.277921	YES
t0167_NP_804050.1_+_193329-194600	0.276678	YES
t1241_NP_805047.1_+_1310867-1312087	0.272922	YES
t3505_NP_807153.1_+_3598956-3601607	0.270991	YES
t3818_NP_807440.1_+_3938132-3938599	0.269624	YES
t3421_NP_807084.1_+_3518127-3518654	0.26948	YES
t1020_NP_804839.1_+_1104110-1104529	0.250413	YES
t4343_NP_807936.1_+_4493121-4493867	0.249498	YES
t3898_NP_807513.1_+_4024596-4027220	0.243145	YES
t3859_NP_807479.1_+_3987225-3988679	0.241445	YES
t1643_NP_805421.1_+_1702408-1703286	0.23396	YES
t3996_NP_807606.1_-_4145847-4146530	0.231832	YES
t4269_NP_807867.1_+_4434572-4434991	0.231429	YES
t1797_NP_805570.1_+_1859164-1863126	0.22653	YES
t0007_NP_803892.1_+_7665-8618	0.226451	YES
t4512_NP_808099.1_-_4659425-4660936	0.225787	YES
t4490_NP_808077.1_-_4637324-4638271	0.224878	YES
t4091_NP_807698.1_+_4230890-4231273	0.223626	YES
t3223_NP_806899.1_+_3314570-3314857	0.219413	YES
t1894_NP_805662.1_-_1950505-1951908	0.217854	YES
t2554_NP_806276.1_-_2631487-2632431	0.217459	YES
t4174_NP_807778.1_+_4335921-4337270	0.216452	YES
t0256_NP_804133.1_+_293573-294874	0.213879	YES
t1452_NP_805244.1_-_1495814-1496875	0.213554	YES
t0880_NP_804710.1_+_981317-981736	0.208214	YES
t1240_NP_805046.1_+_1309599-1310870	0.207832	YES
t0093_NP_803977.1_-_102458-103279	0.204148	YES
t0859_NP_804694.1_+_949972-950901	0.202807	YES
t4356_NP_807949.1_+_4509837-4511426	0.200737	YES
t2336_NP_806070.1_-_2400031-2401179	0.194146	YES
t0017_NP_803902.1_-_17049-17492	0.193835	YES
t1372_NP_805168.1_-_1427187-1428683	0.189247	YES
t2052_NP_805815.1_-_2113821-2114294	0.185849	YES
t0345_NP_804216.1_-_412555-413904	0.185233	YES
t3510_NP_807158.1_-_3606678-3608858	0.183406	YES
t4384_NP_807975.1_-_4536798-4537655	0.182117	YES
t0242_NP_804122.1_+_278816-279238	0.179106	YES
t1649_NP_805427.1_-_1706734-1707462	0.172907	YES
t2883_NP_806579.1_+_2968305-2969621	0.171077	YES
t2880_NP_806576.1_+_2965030-2965845	0.169057	YES
t2956_NP_806648.1_-_3045592-3046344	0.168755	YES
t0806_NP_804648.1_+_899947-901311	0.168691	YES
t2109_NP_805866.1_+_2172119-2173594	0.167245	YES
t3391_NP_807055.1_-_3492921-3493262	0.16518	YES
t3396_NP_807060.1_-_3498358-3498618	0.164544	YES
t3173_NP_806852.1_+_3265258-3266112	0.160383	YES
t1586_NP_805368.1_+_1646262-1646768	0.158652	YES
t2495_NP_806223.1_-_2569380-2570549	0.157868	YES
t1904_NP_805672.1_-_1956593-1957390	0.157812	YES
t0274_NP_804150.1_+_312191-313990	0.155895	YES
t4109_NP_807713.1_-_4247595-4248032	0.154709	YES
t2337_NP_806071.1_-_2401202-2402500	0.152931	YES
t2111_NP_805868.1_+_2174896-2175912	0.150745	YES
t1142_NP_804953.1_+_1213763-1214551	0.150439	YES
t2137_NP_805891.1_-_2198361-2199230	0.148441	YES
t2769_NP_806470.1_-_2849967-2850854	0.147519	YES
t0147_NP_804030.1_+_167191-168234	0.14711	YES
t3713_NP_807347.1_+_3827472-3827834	0.145652	YES
t1831_NP_805603.1_+_1894130-1894810	0.1369	YES
t2599_NP_806316.1_+_2676961-2677593	0.132498	YES
t1731_NP_805506.1_+_1796438-1797022	0.132267	YES
t2970_NP_806662.1_-_3058805-3059644	0.130844	YES
t2315_NP_806049.1_-_2378933-2379451	0.127168	YES
t0297_NP_804173.1_-_338668-340812	0.12338	YES
t1834_NP_805605.1_+_1896140-1896799	0.122161	YES
t4244_NP_807843.1_+_4413280-4413750	0.122033	YES
t2761_NP_806462.1_+_2842453-2844531	0.12117	YES
t2278_NP_806020.1_+_2345403-2346197	0.118573	YES
t1687_NP_805463.1_+_1750190-1750837	0.116319	YES
t0832_NP_804671.1_-_926508-927029	0.115708	YES
t3188_NP_806866.1_-_3279648-3280283	0.111925	YES
t0401_NP_804270.1_+_477265-478161	0.11151	YES
t4127_NP_807731.1_+_4269936-4271585	0.110694	YES
t3714_NP_807348.1_+_3827831-3828361	0.110657	YES
t2579_NP_806297.1_-_2659787-2660281	0.109761	YES
t3214_NP_806890.1_-_3306746-3307372	0.108744	YES
t0540_NP_804397.1_+_613699-615036	0.108607	YES
t2815_NP_806514.1_-_2893367-2894317	0.10409	YES
t4112_NP_807716.1_+_4251020-4252324	0.103572	YES
t4296_NP_807893.1_-_4459412-4459897	0.102608	YES
t3171_NP_806850.1_-_3263133-3264080	0.0971585	YES
t1883_NP_805651.1_-_1942315-1943460	0.0941893	YES
t4515_NP_808102.1_-_4663719-4664717	0.0941154	YES
t0589_NP_804446.1_-_666818-667513	0.0939408	YES
t0474_NP_804332.1_+_547719-548003	0.0879004	YES
t1553_NP_805336.1_+_1609641-1613165	0.0875165	YES
t1445_NP_805238.1_+_1489440-1490828	0.08072	YES
t1988_NP_805751.1_-_2044404-2046680	0.0790817	YES
t4347_NP_807940.1_-_4498207-4499001	0.0770543	YES
t2117_NP_805874.1_-_2180997-2182076	0.0764143	YES
t3764_NP_807389.1_-_3882030-3883013	0.0687432	YES
t2104_NP_805861.1_-_2168295-2169353	0.0644544	YES
t0558_NP_804415.1_+_634081-635448	0.0641451	YES
t4189_NP_807793.1_+_4351835-4352455	0.0625748	YES
t2189_NP_805939.1_-_2256003-2257670	0.0623446	YES
t1085_NP_804900.1_-_1169212-1170060	0.0595479	YES
t0794_NP_804636.1_+_889332-890315	0.059359	YES
t4620_NP_808192.1_-_4771877-4773544	0.0590788	YES
t0645_NP_804497.1_-_727738-728142	0.0586635	YES
t3814_NP_807436.1_-_3934235-3935518	0.0560851	YES
t2004_NP_805767.1_+_2064138-2064653	0.0545828	YES
t2629_NP_806340.1_-_2706365-2707132	0.0533698	YES
t2778_NP_806479.1_+_2857723-2859384	0.0499165	YES
t0782_NP_804624.1_+_873701-875014	0.0495635	YES
t0098_NP_803982.1_-_109120-109779	0.0484754	YES
t1449_NP_805242.1_-_1493412-1493954	0.0478923	YES
t1039_NP_804856.1_+_1122679-1122966	0.0459075	YES
t3755_NP_807385.1_+_3870018-3872744	0.0455266	YES
t3967_NP_807577.1_+_4105818-4106888	0.0450136	YES
t3361_NP_807029.1_+_3462340-3463509	0.0438613	YES
t4016_NP_807625.1_+_4169489-4170028	0.0428261	YES
t0314_NP_804189.1_+_359311-359697	0.042044	YES
t0258_NP_804135.1_-_295239-296594	0.0411374	YES
t2672_NP_806383.1_-_2762521-2764701	0.0393757	YES
t0343_NP_804215.1_+_405324-406904	0.0388762	YES
t4591_NP_808166.1_+_4746340-4746966	0.0351951	YES
t3913_NP_807527.1_+_4049239-4050828	0.0332836	YES
t4297_NP_807894.1_-_4459897-4462677	0.0328845	YES
t1253_NP_805056.1_-_1324901-1325653	0.0317213	YES
t2828_NP_806525.1_-_2903908-2904669	0.0312124	YES
t1635_NP_805413.1_+_1694025-1695587	0.030872	YES
t3239_NP_806915.1_+_3326292-3326783	0.0305207	YES
t4248_NP_807847.1_+_4417202-4417678	0.0304925	YES
t3908_NP_807522.1_-_4043690-4045012	0.0280612	YES
t0571_NP_804428.1_+_646900-647682	0.028054	YES
t3822_NP_807443.1_-_3941984-3943180	0.0277317	YES
t1686_NP_805462.1_+_1749003-1750109	0.0276588	YES
t1021_NP_804840.1_-_1104917-1105393	0.0269306	YES
t1051_NP_804868.1_-_1134788-1136152	0.0266045	YES
t0945_NP_804770.1_-_1033769-1034272	0.0265644	YES
t3091_NP_806775.1_-_3174928-3175911	0.022031	YES
t2437_NP_806167.1_+_2508735-2509526	0.0202901	YES
t1896_NP_805664.1_-_1952716-1952976	0.0199798	YES
t4360_NP_807953.1_-_4513988-4514440	0.0198672	YES
t4366_NP_807959.1_-_4520735-4521061	0.0189438	YES
t0907_NP_804736.1_-_1003673-1004668	0.0184048	YES
t2661_NP_806372.1_-_2748173-2748658	0.0174406	YES
t3443_NP_807105.1_+_3532744-3533229	0.0174406	YES
t3471_NP_807127.1_+_3559271-3560041	0.0173347	YES
t0817_NP_804657.1_-_914500-915714	0.0167627	YES
t1286_NP_805089.1_+_1352114-1353082	0.016739	YES
t1595_NP_805377.1_-_1653140-1653808	0.0149773	YES
t2223_NP_805966.1_-_2289451-2290545	0.0108293	YES
t3823_NP_807444.1_+_3943448-3944503	0.0104558	YES
t2246_NP_805988.1_+_2310948-2312477	0.00681314	YES
t0985_NP_804808.1_-_1072648-1073403	0.0066221	YES
t3487_NP_807139.1_+_3577224-3578174	0.00592519	YES
t2834_NP_806531.1_-_2907780-2908385	0.00572963	YES
t4550_NP_808128.1_-_4702025-4703653	0.0053451	YES
t1503_NP_805289.1_+_1555515-1556714	0.00267728	YES
t2717_NP_806423.1_-_2807742-2808308	0.00130561	YES

## Sheet: 287_91
Protein	Score	T3S protein or Not
SG1714_YP_002226683.1_-_1781586-1782002	1.47595	YES
SG1261_YP_002226283.1_+_1327234-1327956	1.26293	YES
SG1488_YP_002226486.1_-_1557372-1558598	1.21311	YES
SG2786_YP_002227628.1_-_2903321-2904550	1.20033	YES
SG1946_YP_002226887.1_-_2011655-2012353	1.1466	YES
SG2848_YP_002227686.1_+_2961320-2962273	1.10819	YES
SG1712_YP_002226681.1_-_1780302-1781084	1.09772	YES
SG1897_YP_002226843.1_+_1960616-1961626	1.04993	YES
SG2784_YP_002227626.1_-_2900143-2902200	1.00893	YES
SG1723_YP_002226692.1_-_1788598-1788999	0.987711	YES
SG1095_YP_002226147.1_-_1181613-1183019	0.953284	YES
SG1715_YP_002226684.1_-_1782005-1782592	0.942234	YES
SG2768_YP_002227610.1_-_2885362-2886270	0.937104	YES
SG1716_YP_002226685.1_-_1782608-1784062	0.92618	YES
SG2503_YP_002227378.1_+_2570685-2571635	0.926096	YES
SG0238_YP_002225372.1_+_277963-280104	0.914826	YES
SG1752_YP_002226716.1_-_1819464-1822520	0.892566	YES
SG1810_YP_002226770.1_-_1881888-1883231	0.852261	YES
SG0980_YP_002226045.1_-_1065368-1067053	0.826378	YES
SG0961_YP_002226027.1_-_1049515-1050024	0.788189	YES
SG2401_YP_002227285.1_+_2468528-2469529	0.770894	YES
SG0397_YP_002225499.1_+_436188-437300	0.760332	YES
SG1233_YP_002226269.1_-_1307312-1308034	0.747943	YES
SG2799_YP_002227641.1_-_2915946-2917064	0.740644	YES
SG2113_YP_002227026.1_-_2156863-2158296	0.66652	YES
SG1096_YP_002226148.1_+_1183275-1184792	0.657172	YES
SG2616_YP_002227476.1_-_2714759-2715487	0.619169	YES
SG2238_YP_002227136.1_-_2294936-2295799	0.618279	YES
SG0033_YP_002225175.1_+_33252-34256	0.606078	YES
SG2456_YP_002227332.1_-_2526493-2527419	0.598964	YES
SG2199_YP_002227102.1_-_2252489-2253436	0.593393	YES
SG1798_YP_002226758.1_+_1869782-1872034	0.592973	YES
SG2630_YP_002227490.1_-_2728987-2729370	0.585987	YES
SG2076_YP_002226993.1_+_2118948-2119439	0.575174	YES
SG4314_YP_002229020.1_+_4545420-4545692	0.56567	YES
SG1983_YP_002226923.1_+_2042664-2043410	0.542752	YES
SG3772_YP_002228535.1_+_3970982-3972436	0.541481	YES
SG1711_YP_002226680.1_-_1779616-1780305	0.538609	YES
SG1161_YP_002226204.1_+_1243450-1244451	0.537862	YES
SG1221_YP_002226260.1_+_1294052-1297105	0.516239	YES
SG2785_YP_002227627.1_-_2902219-2903250	0.496274	YES
SG3977_YP_002228713.1_-_4203047-4204114	0.489348	YES
SG1267_YP_002226289.1_-_1331471-1334110	0.484115	YES
SG2704_YP_002227550.1_+_2822119-2822646	0.483723	YES
SG1769_YP_002226732.1_+_1842725-1843771	0.483086	YES
SG1662_YP_002226632.1_+_1737491-1738549	0.475388	YES
SG1884_YP_002226830.1_+_1947257-1947922	0.459856	YES
SG1718_YP_002226687.1_-_1784535-1785125	0.453554	YES
SG0032_YP_002225174.1_-_32433-32882	0.4497	YES
SG3230_YP_002228042.1_-_3368134-3368925	0.442647	YES
SG2787_YP_002227629.1_-_2904578-2906359	0.440554	YES
SG2925_YP_002227757.1_-_3054861-3056315	0.438599	YES
SG2992_YP_002227822.1_-_3124474-3125160	0.43648	YES
SG3788_YP_002228548.1_-_3984210-3984839	0.433121	YES
SG2614_YP_002227474.1_-_2713636-2714016	0.428021	YES
SG0256_YP_002225390.1_+_300075-300854	0.421746	YES
SG2516_YP_002227390.1_-_2589265-2590128	0.421737	YES
SG1079_YP_002226131.1_-_1167909-1168913	0.416743	YES
SG0972_YP_002226038.1_+_1059887-1060666	0.404782	YES
SG2497_YP_002227372.1_-_2564410-2565426	0.39042	YES
SG2644_YP_002227504.1_+_2750709-2751047	0.380982	YES
SG3585_YP_002228368.1_-_3771530-3772285	0.376477	YES
SG3821_YP_002228570.1_+_4023949-4025868	0.373796	YES
SG1938_YP_002226881.1_-_2003339-2004292	0.372257	YES
SG0034_YP_002225176.1_-_34264-34704	0.368047	YES
SG3964_YP_002228700.1_-_4190367-4190693	0.365481	YES
SG2781_YP_002227623.1_-_2897535-2899166	0.364153	YES
SG1950_YP_002226891.1_+_2014097-2014390	0.364007	YES
SG3056_YP_002227877.1_-_3185354-3186088	0.361323	YES
SG3153_YP_002227967.1_+_3290772-3291545	0.352282	YES
SG2317_YP_002227206.1_-_2380950-2381753	0.350864	YES
SG3669_YP_002228445.1_+_3859562-3860338	0.349758	YES
SG2879_YP_002227712.1_+_2997969-2999333	0.346385	YES
SG1980_YP_002226920.1_+_2041057-2041707	0.344521	YES
SG1860_YP_002226810.1_-_1924089-1924877	0.333873	YES
SG2014_YP_002226944.1_-_2069115-2069537	0.331104	YES
SG4174_YP_002228895.1_+_4410178-4410549	0.330372	YES
SG1914_YP_002226858.1_-_1978851-1979675	0.327273	YES
SG3641_YP_002228420.1_+_3829720-3830640	0.325053	YES
SG1015_YP_002226079.1_-_1102058-1102939	0.324776	YES
SG3544_YP_002228331.1_+_3721829-3722677	0.322539	YES
SG4041_YP_002228774.1_-_4250100-4250537	0.319194	YES
SG3113_YP_002227932.1_-_3248088-3249608	0.31844	YES
SG1235_YP_002226270.1_-_1308514-1309314	0.317934	YES
SG0712_YP_002225794.1_-_772527-773489	0.316682	YES
SG2165_YP_002227075.1_+_2221141-2222343	0.315553	YES
SG2835_YP_002227674.1_-_2947539-2947895	0.314607	YES
SG4405_YP_002229098.1_+_4642222-4642548	0.313828	YES
SG2527_YP_002227401.1_+_2601033-2601392	0.312944	YES
SG2102_YP_002227015.1_+_2145050-2146354	0.299644	YES
SG1042_YP_002226101.1_-_1133720-1134232	0.298965	YES
SG1070_YP_002226122.1_-_1162684-1163559	0.295234	YES
SG1564_YP_002226552.1_+_1639720-1640151	0.294813	YES
SG2629_YP_002227489.1_+_2728338-2728925	0.294617	YES
SG0477_YP_002225576.1_-_521792-522181	0.292659	YES
SG1763_YP_002226726.1_+_1834536-1835471	0.284103	YES
SG1745_YP_002226709.1_-_1812836-1814107	0.283825	YES
SG2157_YP_002227069.1_+_2208105-2209457	0.279011	YES
SG1094_YP_002226146.1_-_1181191-1181598	0.277921	YES
SG1744_YP_002226708.1_-_1811619-1812839	0.272922	YES
SG3296_YP_002228105.1_+_3444433-3447084	0.270991	YES
SG3730_YP_002228497.1_+_3921031-3921498	0.269624	YES
SG0914_YP_002225980.1_+_987046-988005	0.255674	YES
SG4063_YP_002228794.1_+_4275293-4276942	0.254489	YES
SG0537_YP_002225628.1_+_584624-585772	0.251736	YES
SG3097_YP_002227917.1_-_3229373-3232216	0.249045	YES
SG1587_YP_002226567.1_+_1660851-1661912	0.243746	YES
SG1490_YP_002226488.1_-_1559869-1560270	0.243477	YES
SG2700_YP_002227546.1_+_2820221-2820898	0.240891	YES
SG4281_YP_002228991.1_-_4511348-4512295	0.236789	YES
SG3695_YP_002228463.1_+_3888441-3889298	0.235719	YES
SG2109_YP_002227022.1_-_2151263-2152246	0.235084	YES
SG1285_YP_002226304.1_-_1348627-1349487	0.234784	YES
SG2762_YP_002227604.1_+_2879166-2881244	0.226619	YES
SG1012_YP_002226076.1_-_1094379-1098341	0.22653	YES
SG0007_YP_002225154.1_+_7555-8508	0.226451	YES
SG4302_YP_002229010.1_-_4533423-4534934	0.225787	YES
SG4024_YP_002228759.1_+_4233489-4233872	0.223626	YES
SG3638_YP_002228417.1_+_3826626-3828314	0.220122	YES
SG3196_YP_002228008.1_+_3333537-3333824	0.219413	YES
SG2713_YP_002227557.1_+_2827867-2828274	0.217876	YES
SG4112_YP_002228839.1_+_4341268-4342617	0.216452	YES
SG0754_YP_002225836.1_-_817591-818607	0.212081	YES
SG0999_YP_002226064.1_-_1084815-1085177	0.210212	YES
SG1554_YP_002226542.1_-_1627617-1628057	0.206698	YES
SG0165_YP_002225305.1_+_193075-194346	0.204837	YES
SG0092_YP_002225231.1_-_102372-103193	0.204148	YES
SG2039_YP_002226965.1_-_2090839-2091768	0.202807	YES
SG1434_YP_002226441.1_-_1504525-1505031	0.199781	YES
SG1384_YP_002226397.1_-_1452802-1453680	0.196831	YES
SG0017_YP_002225163.1_-_16935-17378	0.193835	YES
SG0193_YP_002225329.1_+_220225-222699	0.192638	YES
SG3817_YP_002228566.1_+_4014173-4016797	0.190798	YES
SG4044_YP_002228777.1_+_4253525-4254829	0.190089	YES
SG0560_YP_002225650.1_+_607545-608063	0.187824	YES
SG2828_YP_002227667.1_-_2942112-2943245	0.187594	YES
SG0814_YP_002225891.1_+_879278-879751	0.185849	YES
SG2544_YP_002227415.1_+_2617785-2619134	0.185233	YES
SG3310_YP_002228115.1_-_3460573-3462753	0.183406	YES
SG1997_YP_002226931.1_-_2053951-2054199	0.182242	YES
SG3928_YP_002228667.1_-_4148223-4148906	0.179127	YES
SG2885_YP_002227718.1_+_3005998-3007314	0.171077	YES
SG2882_YP_002227715.1_+_3002723-3003538	0.169057	YES
SG2098_YP_002227011.1_-_2140261-2141625	0.168691	YES
SG2638_YP_002227498.1_-_2737456-2738757	0.166294	YES
SG3540_YP_002228327.1_-_3717344-3717604	0.164544	YES
SG0761_YP_002225843.1_+_824149-825207	0.163679	YES
SG0767_YP_002225849.1_+_831137-831814	0.163669	YES
SG3511_YP_002228300.1_+_3683945-3685084	0.159095	YES
SG0381_YP_002225483.1_+_416972-418141	0.157868	YES
SG2620_YP_002227480.1_-_2718346-2720145	0.155895	YES
SG0536_YP_002225627.1_+_583303-584601	0.152931	YES
SG0190_YP_002225326.1_-_218314-218769	0.151029	YES
SG0839_YP_002225912.1_+_907135-908820	0.150168	YES
SG3204_YP_002228016.1_+_3339001-3339936	0.149647	YES
SG0237_YP_002225371.1_+_276172-277887	0.148916	YES
SG0244_YP_002225378.1_+_283175-283597	0.146899	YES
SG3446_YP_002228239.1_+_3606212-3606982	0.145645	YES
SG3628_YP_002228408.1_+_3817485-3817847	0.140338	YES
SG2809_YP_002227649.1_-_2924031-2924699	0.139415	YES
SG0976_YP_002226042.1_-_1062687-1063367	0.1369	YES
SG2974_YP_002227804.1_-_3106024-3106977	0.132894	YES
SG2565_YP_002227430.1_-_2654560-2656965	0.132002	YES
SG3395_YP_002228191.1_+_3546624-3547052	0.131678	YES
SG4288_YP_002228997.1_-_4518124-4518612	0.12591	YES
SG1378_YP_002226391.1_+_1448626-1449354	0.125164	YES
SG3535_YP_002228322.1_-_3711902-3712243	0.124629	YES
SG2596_YP_002227457.1_+_2691525-2693669	0.12338	YES
SG2770_YP_002227612.1_-_2887571-2888458	0.122483	YES
SG1241_YP_002226272.1_+_1313404-1313895	0.122204	YES
SG0309_YP_002225426.1_+_341020-341736	0.12146	YES
SG0594_YP_002225680.1_-_641105-641899	0.118573	YES
SG1080_YP_002226132.1_-_1168918-1169445	0.117366	YES
SG1888_YP_002226834.1_+_1949962-1950609	0.116319	YES
SG2488_YP_002227363.1_-_2555203-2556099	0.11151	YES
SG1925_YP_002226869.1_-_1989771-1990976	0.110043	YES
SG3187_YP_002227999.1_-_3325715-3326341	0.108744	YES
SG2353_YP_002227240.1_-_2419573-2420910	0.108607	YES
SG4369_YP_002229063.1_+_4602943-4604001	0.106186	YES
SG2821_YP_002227660.1_-_2936267-2937190	0.104771	YES
SG2817_YP_002227656.1_-_2932605-2933555	0.10409	YES
SG2069_YP_002226988.1_+_2114828-2115349	0.100635	YES
SG4305_YP_002229013.1_-_4537660-4538658	0.0941154	YES
SG0143_YP_002225283.1_+_165616-166659	0.0934344	YES
SG1933_YP_002226877.1_+_1996372-1996956	0.0923397	YES
SG0593_YP_002225679.1_+_639916-641052	0.0919116	YES
SG2421_YP_002227304.1_-_2486674-2486958	0.0895778	YES
SG2028_YP_002226957.1_+_2079562-2079963	0.0867588	YES
SG2303_YP_002227192.1_+_2364472-2365167	0.0821428	YES
SG3833_YP_002228579.1_+_4038753-4040342	0.0813956	YES
SG1595_YP_002226574.1_-_1668243-1669631	0.08072	YES
SG0140_YP_002225279.1_+_162888-163829	0.0805044	YES
SG0889_YP_002225957.1_+_956776-959052	0.0790817	YES
SG2683_YP_002227534.1_-_2799369-2801549	0.0718062	YES
SG4329_YP_002229029.1_-_4559215-4559940	0.0690631	YES
SG1426_YP_002226433.1_+_1498200-1498868	0.0676042	YES
SG2334_YP_002227221.1_-_2396585-2397952	0.0641451	YES
SG0683_YP_002225765.1_+_737625-739292	0.0623446	YES
SG2979_YP_002227809.1_-_3112441-3113190	0.06231	YES
SG2636_YP_002227496.1_+_2735736-2737091	0.0611424	YES
SG3608_YP_002228388.1_+_3797861-3798901	0.0610037	YES
SG2933_YP_002227763.1_-_3062948-3063706	0.0593598	YES
SG4403_YP_002229096.1_-_4638351-4640018	0.0590788	YES
SG1040_YP_002226099.1_-_1129686-1131599	0.0583605	YES
SG3659_YP_002228437.1_+_3848142-3848999	0.0580574	YES
SG2673_YP_002227529.1_+_2788364-2789167	0.0577323	YES
SG2652_YP_002227512.1_-_2758302-2759069	0.0533698	YES
SG0097_YP_002225236.1_-_109040-109699	0.0484754	YES
SG1278_YP_002226298.1_+_1342997-1343284	0.0459075	YES
SG0880_YP_002225950.1_-_947045-948697	0.0443061	YES
SG3144_YP_002227958.1_-_3281113-3282003	0.0423013	YES
SG2577_YP_002227442.1_-_2672700-2673086	0.042044	YES
SG0722_YP_002225804.1_+_784833-785702	0.039367	YES
SG2779_YP_002227621.1_+_2895320-2896981	0.0386952	YES
SG1038_YP_002226097.1_-_1127323-1128621	0.0350238	YES
SG1258_YP_002226280.1_+_1324557-1324976	0.0327908	YES
SG2830_YP_002227669.1_-_2944041-2944802	0.0312124	YES
SG3285_YP_002228094.1_-_3431588-3432439	0.0308815	YES
SG1392_YP_002226405.1_-_1460501-1462063	0.030872	YES
SG3212_YP_002228024.1_+_3345259-3345750	0.0305207	YES
SG3827_YP_002228575.1_-_4033208-4034530	0.0280612	YES
SG3947_YP_002228686.1_+_4171863-4172402	0.0277569	YES
SG1887_YP_002226833.1_+_1948775-1949881	0.0276588	YES
SG1291_YP_002226309.1_-_1355105-1356469	0.0266045	YES
SG1121_YP_002226168.1_-_1204004-1204507	0.0265644	YES
SG2435_YP_002227314.1_+_2502082-2503473	0.0241138	YES
SG1036_YP_002226095.1_-_1125459-1126790	0.0236279	YES
SG2320_YP_002227209.1_-_2384343-2385125	0.0210663	YES
SG1085_YP_002226137.1_-_1173239-1174234	0.0184048	YES
SG4377_YP_002229071.1_+_4611581-4612306	0.0171491	YES
SG2086_YP_002227001.1_+_2125917-2127131	0.0167627	YES
SG1706_YP_002226675.1_-_1777467-1778015	0.015497	YES
SG1590_YP_002226570.1_-_1663282-1664298	0.0143294	YES
SG0846_YP_002225918.1_-_914373-914981	0.0132422	YES
SG1318_YP_002226336.1_-_1381845-1382579	0.0131165	YES
SG0625_YP_002225710.1_-_674159-675688	0.0101634	YES
SG2824_YP_002227663.1_+_2938745-2939338	0.0074379	YES
SG3666_YP_002228442.1_+_3854383-3857109	0.00635864	YES
SG2836_YP_002227675.1_-_2947913-2948518	0.00619446	YES
SG3462_YP_002228253.1_+_3625439-3626389	0.00592519	YES
SG0872_YP_002225942.1_-_938806-939321	0.00178038	YES
SG2728_YP_002227570.1_-_2844749-2845318	0.00130561	YES
SG1158_YP_002226201.1_+_1240883-1241812	0.0012214	YES
SG3734_YP_002228501.1_-_3924883-3926079	0.000858708	YES
SG1698_YP_002226667.1_-_1770383-1771351	0.000448057	YES

## Sheet: AKU_12601
Protein	Score	T3S protein or Not
SSPA1349_YP_002142188.1_-_1520006-1520422	1.47595	YES
SSPA2387_YP_002143232.1_+_2665572-2666294	1.21407	YES
SSPA2556_YP_002143401.1_-_2837929-2839158	1.20033	YES
SSPA0949_YP_002141789.1_+_1083416-1084138	1.16399	YES
SSPA0849_YP_002141690.1_-_982137-983540	1.16187	YES
SSPA1557_YP_002142397.1_-_1734277-1734975	1.1466	YES
SSPA1511_YP_002142350.1_+_1683822-1684832	1.13173	YES
SSPA1142_YP_002141981.1_+_1294001-1295833	1.1226	YES
SSPA2610_YP_002143455.1_+_2894969-2895922	1.09077	YES
SSPA1347_YP_002142186.1_-_1518722-1519504	0.995234	YES
SSPA1358_YP_002142197.1_-_1527078-1527479	0.987711	YES
SSPA1429_YP_002142268.1_-_1606761-1608104	0.977273	YES
SSPA1733_YP_002142571.1_+_1935902-1936870	0.962249	YES
SSPA1350_YP_002142189.1_-_1520425-1521012	0.936491	YES
SSPA0370_YP_002141215.1_-_467320-468270	0.926096	YES
SSPA0233_YP_002141078.1_+_280206-282347	0.920045	YES
SSPA1383_YP_002142222.1_-_1558231-1561287	0.908403	YES
SSPA2554_YP_002143399.1_-_2834761-2836818	0.883621	YES
SSPA1634_YP_002142474.1_+_1813592-1815277	0.854336	YES
SSPA1652_YP_002142492.1_+_1830623-1831132	0.790401	YES
SSPA0457_YP_002141302.1_-_563347-564348	0.787385	YES
SSPA1339_YP_002142178.1_-_1514234-1515226	0.730897	YES
SSPA2230_YP_002143068.1_-_2489884-2491221	0.707459	YES
SSPA0738_YP_002141579.1_+_875930-877363	0.688438	YES
SSPA0742_YP_002141583.1_+_881987-882964	0.688283	YES
SSPA0770_YP_002141611.1_-_914885-915376	0.642006	YES
SSPA2550_YP_002143395.1_-_2832153-2833784	0.629612	YES
SSPA0271_YP_002141116.1_+_322788-323516	0.619169	YES
SSPA0611_YP_002141454.1_+_729797-730660	0.618279	YES
SSPA0933_YP_002141774.1_-_1067720-1068469	0.612816	YES
SSPA0028_YP_002140876.1_+_33397-34392	0.606078	YES
SSPA2181_YP_002143018.1_-_2429344-2430456	0.604748	YES
SSPA1417_YP_002142256.1_+_1594656-1596908	0.592973	YES
SSPA0376_YP_002141221.1_+_473530-474546	0.591979	YES
SSPA0257_YP_002141102.1_+_308904-309287	0.585987	YES
SSPA1351_YP_002142190.1_-_1521028-1522482	0.571041	YES
SSPA2686_YP_002143529.1_-_2989094-2990509	0.564621	YES
SSPA3119_YP_002143960.1_+_3428120-3428446	0.563402	YES
SSPA4005_YP_002144839.1_-_4477563-4483883	0.561464	YES
SSPA2569_YP_002143414.1_-_2850554-2851672	0.556753	YES
SSPA1592_YP_002142432.1_+_1765288-1766034	0.542752	YES
SSPA1346_YP_002142185.1_-_1518036-1518725	0.538609	YES
SSPA2555_YP_002143400.1_-_2836837-2837859	0.537492	YES
SSPA0414_YP_002141259.1_+_509964-510890	0.526744	YES
SSPA0768_YP_002141609.1_-_913586-914596	0.499341	YES
SSPA1388_YP_002142227.1_+_1567576-1568622	0.483086	YES
SSPA0937_YP_002141777.1_-_1070928-1072058	0.483	YES
SSPA1353_YP_002142192.1_-_1522955-1523545	0.481837	YES
SSPA2169_YP_002143006.1_-_2417099-2417740	0.476847	YES
SSPA0647_YP_002141490.1_+_772309-773256	0.470479	YES
SSPA1498_YP_002142337.1_+_1670463-1671128	0.459856	YES
SSPA0348_YP_002141193.1_-_437560-437919	0.454455	YES
SSPA0955_YP_002141795.1_-_1087652-1090291	0.447476	YES
SSPA2995_YP_002143836.1_-_3312284-3313075	0.442647	YES
SSPA2557_YP_002143402.1_-_2839186-2840967	0.440554	YES
SSPA2476_YP_002143321.1_+_2757713-2758240	0.434303	YES
SSPA0273_YP_002141118.1_+_324259-324639	0.428021	YES
SSPA4030_YP_002144864.1_+_4511425-4512795	0.423297	YES
SSPA2342_YP_002143187.1_-_2605543-2606322	0.421746	YES
SSPA0358_YP_002141203.1_+_448826-449689	0.421737	YES
SSPA1528_YP_002142367.1_-_1702778-1703602	0.416038	YES
SSPA1297_YP_002142136.1_+_1475909-1476967	0.410866	YES
SSPA3377_YP_002144214.1_+_3749512-3750414	0.405848	YES
SSPA1642_YP_002142482.1_-_1819982-1820761	0.404782	YES
SSPA0027_YP_002140875.1_-_32578-33027	0.383869	YES
SSPA0850_YP_002141691.1_+_983797-985284	0.382723	YES
SSPA2449_YP_002143295.1_-_2724589-2726109	0.382723	YES
SSPA2350_YP_002143195.1_+_2621049-2621387	0.380982	YES
SSPA2760_YP_002143602.1_-_3064161-3064847	0.375903	YES
SSPA2392_YP_002143237.1_-_2670015-2670374	0.374151	YES
SSPA3241_YP_002144080.1_-_3580812-3582731	0.373796	YES
SSPA1549_YP_002142389.1_-_1725961-1726914	0.372257	YES
SSPA0833_YP_002141674.1_-_968410-969414	0.368604	YES
SSPA0029_YP_002140877.1_-_34409-34846	0.368047	YES
SSPA2013_YP_002142852.1_+_2250051-2250821	0.365427	YES
SSPA1561_YP_002142401.1_+_1736719-1737012	0.364007	YES
SSPA2824_YP_002143666.1_-_3124443-3125177	0.361323	YES
SSPA2923_YP_002143764.1_+_3237247-3238020	0.352282	YES
SSPA3445_YP_002144284.1_+_3829663-3830418	0.350805	YES
SSPA0179_YP_002141024.1_-_210911-213508	0.346757	YES
SSPA2865_YP_002143707.1_-_3170173-3173016	0.339578	YES
SSPA3852_YP_002144689.1_+_4322409-4322780	0.330372	YES
SSPA0016_YP_002140864.1_-_17076-17519	0.325889	YES
SSPA3401_YP_002144238.1_-_3777480-3778400	0.325053	YES
SSPA2881_YP_002143723.1_-_3188887-3190407	0.31844	YES
SSPA4078_YP_002144912.1_+_4565400-4565726	0.313828	YES
SSPA1094_YP_002141934.1_-_1241927-1243060	0.312739	YES
SSPA1729_YP_002142567.1_+_1930388-1931338	0.297961	YES
SSPA1590_YP_002142430.1_+_1763681-1764331	0.297949	YES
SSPA3683_YP_002144521.1_-_4104689-4107340	0.297684	YES
SSPA1879_YP_002142716.1_-_2092058-2094007	0.296468	YES
SSPA1213_YP_002142052.1_+_1380737-1381168	0.294813	YES
SSPA0258_YP_002141103.1_-_309349-309936	0.294617	YES
SSPA2098_YP_002142935.1_+_2344296-2344685	0.294501	YES
SSPA1605_YP_002142445.1_+_1782005-1785910	0.291419	YES
SSPA1758_YP_002142596.1_-_1959634-1960356	0.29046	YES
SSPA2472_YP_002143317.1_+_2755815-2756492	0.282119	YES
SSPA2335_YP_002143180.1_+_2598855-2599898	0.281151	YES
SSPA0698_YP_002141540.1_-_824869-826221	0.279011	YES
SSPA0848_YP_002141689.1_-_981715-982122	0.277921	YES
SSPA0385_YP_002141230.1_+_482677-483573	0.274723	YES
SSPA2196_YP_002143033.1_-_2448429-2449598	0.273232	YES
SSPA3316_YP_002144155.1_-_3679659-3680126	0.269624	YES
SSPA1228_YP_002142067.1_+_1402131-1403192	0.268322	YES
SSPA2043_YP_002142880.1_-_2280583-2281731	0.260803	YES
SSPA1348_YP_002142187.1_-_1519520-1519948	0.252365	YES
SSPA0946_YP_002141786.1_+_1080739-1081158	0.250413	YES
SSPA1830_YP_002142667.1_-_2040482-2041159	0.247486	YES
SSPA3853_YP_002144690.1_-_4322828-4323685	0.242809	YES
SSPA3278_YP_002144118.1_-_3628541-3629995	0.241445	YES
SSPA1841_YP_002142678.1_+_2050880-2052355	0.240779	YES
SSPA1602_YP_002142442.1_+_1777351-1778232	0.240577	YES
SSPA2961_YP_002143802.1_+_3277692-3277979	0.240403	YES
SSPA0538_YP_002141383.1_+_648482-649285	0.23859	YES
SSPA3954_YP_002144788.1_-_4423662-4424609	0.236789	YES
SSPA3351_YP_002144190.1_-_3712763-3713620	0.235719	YES
SSPA0776_YP_002141616.1_-_918993-919514	0.233709	YES
SSPA3150_YP_002143992.1_+_3470098-3470781	0.231832	YES
SSPA0006_YP_002140854.1_+_7704-8657	0.226451	YES
SSPA3975_YP_002144809.1_-_4445752-4447263	0.225787	YES
SSPA3059_YP_002143900.1_-_3384940-3385323	0.223626	YES
SSPA3729_YP_002144567.1_-_4168016-4168453	0.221371	YES
SSPA3404_YP_002144241.1_-_3779795-3781483	0.220122	YES
SSPA2298_YP_002143144.1_-_2551748-2552692	0.217459	YES
SSPA3793_YP_002144631.1_+_4253757-4255106	0.216452	YES
SSPA0290_YP_002141135.1_-_344605-346749	0.21454	YES
SSPA1843_YP_002142680.1_+_2053657-2054673	0.212081	YES
SSPA0812_YP_002141654.1_+_951394-951813	0.208214	YES
SSPA1204_YP_002142042.1_-_1367269-1367709	0.206698	YES
SSPA0161_YP_002141006.1_+_193467-194738	0.204837	YES
SSPA0087_YP_002140933.1_-_102599-103420	0.204148	YES
SSPA0801_YP_002141642.1_+_942609-943538	0.202807	YES
SSPA1117_YP_002141956.1_-_1264525-1265031	0.199781	YES
SSPA1065_YP_002141906.1_-_1208373-1209251	0.196831	YES
SSPA0191_YP_002141036.1_+_222575-225049	0.192638	YES
SSPA1788_YP_002142626.1_-_1993310-1993783	0.185849	YES
SSPA3678_YP_002144516.1_+_4097427-4099607	0.183406	YES
SSPA2426_YP_002143272.1_-_2696647-2697138	0.180981	YES
SSPA1617_YP_002142457.1_+_1795467-1795829	0.179135	YES
SSPA0554_YP_002141397.1_-_665069-665764	0.175027	YES
SSPA0141_YP_002140986.1_+_167323-168366	0.168961	YES
SSPA2707_YP_002143550.1_-_3010869-3011621	0.168755	YES
SSPA0753_YP_002141594.1_+_892604-893968	0.168691	YES
SSPA2969_YP_002143810.1_+_3283155-3284090	0.167288	YES
SSPA3486_YP_002144327.1_+_3881946-3882206	0.164544	YES
SSPA1836_YP_002142673.1_-_2047056-2048114	0.163679	YES
SSPA1638_YP_002142478.1_+_1817281-1817961	0.161711	YES
SSPA0749_YP_002141590.1_-_887875-889179	0.160709	YES
SSPA2914_YP_002143755.1_+_3228383-3229237	0.160383	YES
SSPA0267_YP_002141112.1_+_318130-319929	0.155895	YES
SSPA0332_YP_002141177.1_-_418816-420165	0.154848	YES
SSPA2593_YP_002143438.1_-_2875043-2876176	0.154271	YES
SSPA2044_YP_002142881.1_-_2281754-2283052	0.152931	YES
SSPA3732_YP_002144570.1_+_4171441-4172745	0.15248	YES
SSPA1059_YP_002141900.1_+_1204197-1204925	0.14101	YES
SSPA1470_YP_002142309.1_-_1646666-1647454	0.140112	YES
SSPA2023_YP_002142860.1_-_2259540-2260058	0.139871	YES
SSPA3515_YP_002144357.1_-_3915810-3916949	0.135714	YES
SSPA3734_YP_002144572.1_-_4174980-4175804	0.127944	YES
SSPA3960_YP_002144794.1_-_4430438-4430926	0.12591	YES
SSPA2307_YP_002143152.1_-_2569899-2572145	0.123931	YES
SSPA2539_YP_002143384.1_-_2822178-2823065	0.122483	YES
SSPA3491_YP_002144332.1_+_3887304-3887645	0.122049	YES
SSPA2531_YP_002143376.1_+_2814664-2816742	0.12117	YES
SSPA1236_YP_002142075.1_-_1409517-1410905	0.119157	YES
SSPA2929_YP_002143770.1_-_3242773-3243408	0.118987	YES
SSPA2456_YP_002143301.1_-_2737655-2737987	0.118495	YES
SSPA0239_YP_002141084.1_+_285418-285840	0.114851	YES
SSPA3747_YP_002144585.1_+_4190620-4192269	0.110694	YES
SSPA1538_YP_002142377.1_-_1713698-1714903	0.110043	YES
SSPA2467_YP_002143312.1_+_2749204-2750181	0.109604	YES
SSPA1636_YP_002142476.1_-_1815645-1815965	0.109116	YES
SSPA2952_YP_002143793.1_-_3269870-3270496	0.108744	YES
SSPA0504_YP_002141349.1_+_611965-613302	0.108607	YES
SSPA0838_YP_002141679.1_-_973046-973753	0.106467	YES
SSPA2587_YP_002143432.1_-_2869197-2870120	0.104771	YES
SSPA2583_YP_002143428.1_-_2865586-2866536	0.10409	YES
SSPA2380_YP_002143225.1_-_2659591-2660076	0.102608	YES
SSPA0781_YP_002141622.1_+_924491-925438	0.0985538	YES
SSPA2911_YP_002143752.1_-_3223150-3223866	0.0959536	YES
SSPA3978_YP_002144812.1_-_4449993-4450991	0.0941154	YES
SSPA0438_YP_002141283.1_+_545924-546208	0.0879004	YES
SSPA1145_YP_002141984.1_-_1297415-1300939	0.0875165	YES
SSPA3320_YP_002144159.1_+_3682740-3684023	0.0860601	YES
SSPA3516_YP_002144358.1_-_3917009-3918178	0.0829077	YES
SSPA0249_YP_002141094.1_+_299517-300818	0.0826854	YES
SSPA1724_YP_002142562.1_-_1923879-1926155	0.0790817	YES
SSPA2595_YP_002143440.1_-_2876972-2877733	0.0754285	YES
SSPA2600_YP_002143445.1_-_2880470-2880793	0.0750716	YES
SSPA2638_YP_002143483.1_+_2932167-2933501	0.0742712	YES
SSPA3366_YP_002144205.1_+_3735111-3736094	0.0687432	YES
SSPA3413_YP_002144250.1_-_3790223-3790585	0.066994	YES
SSPA0522_YP_002141367.1_+_632285-633652	0.0641451	YES
SSPA2238_YP_002143085.1_-_2505235-2505858	0.0628538	YES
SSPA3807_YP_002144645.1_+_4269662-4270282	0.0625748	YES
SSPA1916_YP_002142754.1_-_2136854-2138521	0.0623446	YES
SSPA3431_YP_002144268.1_-_3809074-3810114	0.0610037	YES
SSPA2371_YP_002143216.1_-_2639192-2639629	0.0608629	YES
SSPA1866_YP_002142703.1_-_2077781-2078650	0.0601597	YES
SSPA4076_YP_002144910.1_-_4561529-4563196	0.0590788	YES
SSPA3522_YP_002144364.1_+_3924002-3924364	0.0570357	YES
SSPA3708_YP_002144546.1_+_4143635-4143916	0.0537508	YES
SSPA2268_YP_002143115.1_+_2521728-2522078	0.0534562	YES
SSPA2358_YP_002143203.1_-_2628642-2629409	0.0533698	YES
SSPA3004_YP_002143845.1_-_3320214-3320945	0.0524015	YES
SSPA0730_YP_002141571.1_+_866350-867663	0.0495635	YES
SSPA0092_YP_002140938.1_-_109261-109920	0.0484754	YES
SSPA3264_YP_002144104.1_+_3616143-3616760	0.0470218	YES
SSPA1010_YP_002141851.1_-_1145835-1146683	0.0457176	YES
SSPA3375_YP_002144212.1_-_3745365-3748091	0.0455266	YES
SSPA3132_YP_002143974.1_-_3446601-3447140	0.0428261	YES
SSPA0306_YP_002141151.1_+_365208-365594	0.042044	YES
SSPA0251_YP_002141096.1_-_301183-302538	0.0411374	YES
SSPA0137_YP_002140982.1_+_164595-165536	0.0395123	YES
SSPA2548_YP_002143393.1_+_2829938-2831599	0.0386952	YES
SSPA3232_YP_002144071.1_-_3566335-3567924	0.0332836	YES
SSPA2381_YP_002143226.1_-_2660076-2662856	0.0328845	YES
SSPA2912_YP_002143753.1_-_3226258-3227205	0.0322296	YES
SSPA3712_YP_002144550.1_-_4146145-4146915	0.0317865	YES
SSPA2977_YP_002143818.1_+_3289413-3289904	0.0305207	YES
SSPA3236_YP_002144075.1_+_3572152-3573474	0.0280612	YES
SSPA1501_YP_002142340.1_+_1671981-1673087	0.0276588	YES
SSPA2776_YP_002143618.1_-_3077806-3079932	0.0266091	YES
SSPA0871_YP_002141712.1_-_1003748-1004251	0.0265644	YES
SSPA0947_YP_002141787.1_-_1081534-1082010	0.0254146	YES
SSPA4011_YP_002144845.1_-_4491596-4493221	0.0250021	YES
SSPA2250_YP_002143097.1_-_2510622-2511521	0.0241624	YES
SSPA2103_YP_002142940.1_-_2348331-2350073	0.0238034	YES
SSPA2836_YP_002143678.1_-_3138185-3139168	0.022031	YES
SSPA4051_YP_002144885.1_+_4535991-4536614	0.0194059	YES
SSPA0839_YP_002141680.1_-_973746-974741	0.0184048	YES
SSPA4050_YP_002144884.1_+_4535254-4535979	0.0167126	YES
SSPA1341_YP_002142180.1_-_1515887-1516435	0.015497	YES
SSPA1109_YP_002141948.1_+_1258200-1258868	0.0149773	YES
SSPA1231_YP_002142070.1_-_1404562-1405578	0.0143294	YES
SSPA1942_YP_002142781.1_-_2170777-2171871	0.0108293	YES
SSPA3311_YP_002144150.1_-_3673755-3674810	0.0104558	YES
SSPA1073_YP_002141913.1_-_1216072-1217634	0.00933204	YES
SSPA0761_YP_002141602.1_-_907156-908370	0.00775322	YES
SSPA3697_YP_002144535.1_-_4128010-4128960	0.00592519	YES
SSPA3694_YP_002144532.1_+_4119335-4120186	0.00467205	YES
SSPA1183_YP_002142022.1_-_1342984-1344183	0.00267728	YES
SSPA2497_YP_002143342.1_-_2780353-2780919	0.00130561	YES
SSPA1849_YP_002142686.1_-_2059758-2060837	0.0011439	YES
SSPA3312_YP_002144151.1_+_3675078-3676274	0.000858708	YES

## Sheet: ATCC9150
Protein	Score	T3S protein or Not
SPA1451_YP_150702.1_-_1524825-1525241	1.47595	YES
SPA2564_YP_151743.1_+_2670036-2670758	1.21407	YES
SPA2742_YP_151911.1_-_2842393-2843622	1.20033	YES
SPA1018_YP_150302.1_+_1089406-1090128	1.16399	YES
SPA0910_YP_150202.1_-_988127-989530	1.16187	YES
SPA1675_YP_150912.1_-_1739094-1739792	1.1466	YES
SPA1626_YP_150865.1_+_1688639-1689649	1.13173	YES
SPA1232_YP_150496.1_+_1300158-1301990	1.1226	YES
SPA2801_YP_151965.1_+_2899311-2900264	1.09077	YES
SPA1449_YP_150700.1_-_1523541-1524323	0.995234	YES
SPA1460_YP_150711.1_-_1531897-1532298	0.987711	YES
SPA1538_YP_150783.1_-_1611580-1612923	0.977273	YES
SPA1863_YP_151086.1_+_1940719-1941687	0.962249	YES
SPA1452_YP_150703.1_-_1525244-1525831	0.936491	YES
SPA0396_YP_149719.1_-_467286-468236	0.926096	YES
SPA0241_YP_149582.1_+_280166-282307	0.920045	YES
SPA1490_YP_150736.1_-_1563050-1566106	0.908403	YES
SPA2740_YP_151909.1_-_2839225-2841282	0.883621	YES
SPA1759_YP_150989.1_+_1818409-1820094	0.854336	YES
SPA2950_YP_152100.1_-_3058285-3060261	0.847444	YES
SPA1779_YP_151007.1_+_1835440-1835949	0.790401	YES
SPA0493_YP_149807.1_-_563313-564314	0.787385	YES
SPA1441_YP_150692.1_-_1519053-1520045	0.730897	YES
SPA2391_YP_151584.1_-_2494348-2495685	0.707459	YES
SPA0788_YP_150093.1_+_881755-883188	0.688438	YES
SPA0792_YP_150097.1_+_887812-888789	0.688283	YES
SPA0823_YP_150125.1_-_920704-921195	0.642006	YES
SPA2736_YP_151905.1_-_2836617-2838248	0.629612	YES
SPA0286_YP_149620.1_+_322754-323482	0.619169	YES
SPA0650_YP_149962.1_+_729851-730714	0.618279	YES
SPA1001_YP_150286.1_-_1073710-1074459	0.612816	YES
SPA0031_YP_149379.1_+_33357-34352	0.606078	YES
SPA2338_YP_151535.1_-_2433808-2434920	0.604748	YES
SPA1526_YP_150771.1_+_1599475-1601727	0.592973	YES
SPA0402_YP_149725.1_+_473496-474512	0.591979	YES
SPA0272_YP_149606.1_+_308870-309253	0.585987	YES
SPA1453_YP_150704.1_-_1525847-1527301	0.571041	YES
SPA2883_YP_152038.1_-_2993435-2994850	0.564621	YES
SPA3341_YP_152468.1_+_3432444-3432770	0.563402	YES
SPA4314_YP_153354.1_-_4482333-4488653	0.561464	YES
SPA2755_YP_151924.1_-_2855018-2856136	0.556753	YES
SPA1448_YP_150699.1_-_1522855-1523544	0.538609	YES
SPA2741_YP_151910.1_-_2841301-2842323	0.537492	YES
SPA0441_YP_149764.1_+_509930-510856	0.526744	YES
SPA0821_YP_150123.1_-_919405-920415	0.499341	YES
SPA1496_YP_150741.1_+_1572395-1573441	0.483086	YES
SPA1005_YP_150290.1_-_1076918-1078048	0.483	YES
SPA1455_YP_150706.1_-_1527774-1528364	0.481837	YES
SPA2326_YP_151523.1_-_2421563-2422204	0.476847	YES
SPA0688_YP_149998.1_+_772363-773310	0.470479	YES
SPA1613_YP_150852.1_+_1675280-1675945	0.459856	YES
SPA1024_YP_150308.1_-_1093642-1096281	0.447476	YES
SPA3208_YP_152344.1_-_3316609-3317400	0.442647	YES
SPA2743_YP_151912.1_-_2843650-2845431	0.440554	YES
SPA2655_YP_151831.1_+_2762177-2762704	0.434303	YES
SPA0288_YP_149622.1_+_324225-324605	0.428021	YES
SPA4340_YP_153378.1_+_4514857-4516227	0.423297	YES
SPA2511_YP_151697.1_-_2610007-2610786	0.421746	YES
SPA0383_YP_149707.1_+_448792-449655	0.421737	YES
SPA1643_YP_150882.1_-_1707595-1708419	0.416038	YES
SPA1397_YP_150650.1_+_1480728-1481786	0.410866	YES
SPA3615_YP_152725.1_+_3753833-3754735	0.405848	YES
SPA1768_YP_150997.1_-_1824799-1825578	0.404782	YES
SPA0030_YP_149378.1_-_32538-32987	0.383869	YES
SPA0911_YP_150203.1_+_989787-991274	0.382723	YES
SPA2627_YP_151805.1_-_2729053-2730573	0.382723	YES
SPA2525_YP_151706.1_+_2625513-2625851	0.380982	YES
SPA2961_YP_152111.1_-_3068487-3069173	0.375903	YES
SPA2569_YP_151748.1_-_2674479-2674838	0.374151	YES
SPA1667_YP_150904.1_-_1730778-1731731	0.372257	YES
SPA0894_YP_150186.1_-_974400-975404	0.368604	YES
SPA0032_YP_149380.1_-_34369-34806	0.368047	YES
SPA1679_YP_150916.1_+_1741536-1741829	0.364007	YES
SPA3027_YP_152175.1_-_3128769-3129503	0.361323	YES
SPA3131_YP_152272.1_+_3241572-3242345	0.352282	YES
SPA3690_YP_152794.1_+_3833984-3834739	0.350805	YES
SPA0183_YP_149528.1_-_210871-213468	0.346757	YES
SPA3069_YP_152216.1_-_3174499-3177342	0.339578	YES
SPA4148_YP_153201.1_+_4326722-4327093	0.330372	YES
SPA0017_YP_149367.1_-_17036-17479	0.325889	YES
SPA3643_YP_152749.1_-_3781801-3782721	0.325053	YES
SPA3085_YP_152231.1_-_3193213-3194733	0.31844	YES
SPA4393_YP_153428.1_+_4568832-4569158	0.313828	YES
SPA0372_YP_149697.1_-_437526-437885	0.312944	YES
SPA1176_YP_150449.1_-_1248084-1249217	0.312739	YES
SPA1859_YP_151082.1_+_1935205-1936155	0.297961	YES
SPA1709_YP_150945.1_+_1768498-1769148	0.297949	YES
SPA3957_YP_153032.1_-_4109003-4111654	0.297684	YES
SPA2017_YP_151232.1_-_2096875-2098824	0.296468	YES
SPA1305_YP_150565.1_+_1385556-1385987	0.294813	YES
SPA0273_YP_149607.1_-_309315-309902	0.294617	YES
SPA2256_YP_151453.1_+_2349112-2349501	0.294501	YES
SPA4194_YP_153243.1_+_4368625-4370247	0.291752	YES
SPA1888_YP_151111.1_-_1964451-1965173	0.29046	YES
SPA4129_YP_153183.1_-_4311279-4311629	0.290302	YES
SPA1467_YP_150718.1_-_1539169-1540917	0.288999	YES
SPA2651_YP_151827.1_+_2760279-2760956	0.282119	YES
SPA2503_YP_151690.1_+_2603319-2604362	0.281151	YES
SPA0741_YP_150049.1_-_824923-826275	0.279011	YES
SPA0909_YP_150201.1_-_987705-988112	0.277921	YES
SPA0411_YP_149734.1_+_482643-483539	0.274723	YES
SPA2354_YP_151550.1_-_2452893-2454062	0.273232	YES
SPA3553_YP_152666.1_-_3683982-3684449	0.269624	YES
SPA1323_YP_150580.1_+_1406950-1408011	0.268322	YES
SPA2198_YP_151398.1_-_2285399-2286547	0.260803	YES
SPA1450_YP_150701.1_-_1524339-1524767	0.252365	YES
SPA1015_YP_150299.1_+_1086729-1087148	0.250413	YES
SPA4149_YP_153202.1_-_4327141-4327998	0.242809	YES
SPA3511_YP_152628.1_-_3632864-3634318	0.241445	YES
SPA1974_YP_151194.1_+_2055697-2057172	0.240779	YES
SPA1724_YP_150957.1_+_1782168-1783049	0.240577	YES
SPA3173_YP_152310.1_+_3282017-3282304	0.240403	YES
SPA0574_YP_149888.1_+_648448-649251	0.23859	YES
SPA4256_YP_153303.1_-_4428431-4429378	0.236789	YES
SPA0829_YP_150131.1_-_924983-925504	0.233709	YES
SPA3375_YP_152500.1_+_3474422-3475105	0.231832	YES
SPA1727_YP_150960.1_+_1786765-1790727	0.22653	YES
SPA0007_YP_149357.1_+_7664-8617	0.226451	YES
SPA4278_YP_153324.1_-_4450521-4452032	0.225787	YES
SPA3280_YP_152408.1_-_3389264-3389647	0.223626	YES
SPA4019_YP_153078.1_-_4172329-4172766	0.221371	YES
SPA3646_YP_152752.1_-_3784116-3785804	0.220122	YES
SPA2459_YP_151650.1_-_2556212-2557156	0.217459	YES
SPA4085_YP_153142.1_+_4258070-4259419	0.216452	YES
SPA0307_YP_149639.1_-_344571-346715	0.21454	YES
SPA1976_YP_151196.1_+_2058474-2059490	0.212081	YES
SPA0872_YP_150166.1_+_957384-957803	0.208214	YES
SPA0165_YP_149510.1_+_193427-194698	0.204837	YES
SPA0091_YP_149436.1_-_102559-103380	0.204148	YES
SPA0856_YP_150156.1_+_948598-949527	0.202807	YES
SPA1202_YP_150471.1_-_1270682-1271188	0.199781	YES
SPA1146_YP_150419.1_-_1214531-1215409	0.196831	YES
SPA0195_YP_149540.1_+_222535-225009	0.192638	YES
SPA1918_YP_151141.1_-_1998127-1998600	0.185849	YES
SPA3952_YP_153027.1_+_4101743-4103923	0.183406	YES
SPA2603_YP_151782.1_-_2701111-2701602	0.180981	YES
SPA1740_YP_150972.1_+_1800284-1800646	0.179135	YES
SPA0589_YP_149903.1_-_665035-665730	0.175027	YES
SPA0145_YP_149490.1_+_167283-168326	0.168961	YES
SPA2906_YP_152059.1_-_3015195-3015947	0.168755	YES
SPA0803_YP_150108.1_+_898429-899793	0.168691	YES
SPA3741_YP_152836.1_+_3886270-3886530	0.164544	YES
SPA1969_YP_151189.1_-_2051873-2052931	0.163679	YES
SPA1763_YP_150993.1_+_1822098-1822778	0.161711	YES
SPA0799_YP_150104.1_-_893700-895004	0.160709	YES
SPA3122_YP_152263.1_+_3232708-3233562	0.160383	YES
SPA0282_YP_149616.1_+_318096-319895	0.155895	YES
SPA0355_YP_149681.1_-_418782-420131	0.154848	YES
SPA2781_YP_151948.1_-_2879507-2880640	0.154271	YES
SPA2199_YP_151399.1_-_2286570-2287868	0.152931	YES
SPA4022_YP_153081.1_+_4175754-4177058	0.15248	YES
SPA1140_YP_150413.1_+_1210355-1211083	0.14101	YES
SPA1582_YP_150825.1_-_1651483-1652271	0.140112	YES
SPA2177_YP_151378.1_-_2264356-2264874	0.139871	YES
SPA4025_YP_153083.1_-_4179293-4180117	0.127944	YES
SPA4263_YP_153309.1_-_4435207-4435695	0.12591	YES
SPA2471_YP_151660.1_-_2574363-2576609	0.123931	YES
SPA2725_YP_151894.1_-_2826642-2827529	0.122483	YES
SPA1765_YP_150994.1_+_1823397-1824056	0.122161	YES
SPA3746_YP_152841.1_+_3891628-3891969	0.122049	YES
SPA2717_YP_151886.1_+_2819128-2821206	0.12117	YES
SPA1331_YP_150588.1_-_1414336-1415724	0.119157	YES
SPA3137_YP_152278.1_-_3247098-3247733	0.118987	YES
SPA2635_YP_151811.1_-_2742119-2742451	0.118495	YES
SPA0247_YP_149588.1_+_285378-285800	0.114851	YES
SPA4038_YP_153096.1_+_4194933-4196582	0.110694	YES
SPA2646_YP_151822.1_+_2753668-2754645	0.109604	YES
SPA1761_YP_150991.1_-_1820462-1820782	0.109116	YES
SPA3164_YP_152301.1_-_3274195-3274821	0.108744	YES
SPA0540_YP_149854.1_+_611931-613268	0.108607	YES
SPA0899_YP_150191.1_-_979036-979743	0.106467	YES
SPA2775_YP_151942.1_-_2873661-2874584	0.104771	YES
SPA2771_YP_151938.1_-_2870050-2871000	0.10409	YES
SPA2557_YP_151736.1_-_2664055-2664540	0.102608	YES
SPA0835_YP_150136.1_+_930480-931427	0.0985538	YES
SPA4281_YP_153327.1_-_4454762-4455760	0.0941154	YES
SPA0474_YP_149788.1_+_545890-546174	0.0879004	YES
SPA1236_YP_150499.1_-_1303572-1307096	0.0875165	YES
SPA3557_YP_152670.1_+_3687063-3688346	0.0860601	YES
SPA3777_YP_152866.1_-_3921335-3922504	0.0829077	YES
SPA0263_YP_149598.1_+_299476-300777	0.0826854	YES
SPA1854_YP_151077.1_-_1928696-1930972	0.0790817	YES
SPA2783_YP_151950.1_-_2881436-2882197	0.0754285	YES
SPA2788_YP_151955.1_-_2884934-2885257	0.0750716	YES
SPA2833_YP_151993.1_+_2936508-2937842	0.0742712	YES
SPA3606_YP_152716.1_+_3739441-3740424	0.0687432	YES
SPA3655_YP_152761.1_-_3794544-3794906	0.066994	YES
SPA0558_YP_149872.1_+_632251-633618	0.0641451	YES
SPA2399_YP_151592.1_-_2509699-2510322	0.0628538	YES
SPA4100_YP_153156.1_+_4273975-4274595	0.0625748	YES
SPA2055_YP_151269.1_-_2141671-2143338	0.0623446	YES
SPA3675_YP_152780.1_-_3813395-3814435	0.0610037	YES
SPA2546_YP_151727.1_-_2643656-2644093	0.0608629	YES
SPA2004_YP_151219.1_-_2082598-2083467	0.0601597	YES
SPA4391_YP_153426.1_-_4564961-4566628	0.0590788	YES
SPA0641_YP_149953.1_-_720530-720934	0.0586635	YES
SPA3783_YP_152872.1_+_3928328-3928690	0.0570357	YES
SPA3993_YP_153057.1_+_4147948-4148229	0.0537508	YES
SPA2430_YP_151623.1_+_2526192-2526542	0.0534562	YES
SPA2533_YP_151714.1_-_2633106-2633873	0.0533698	YES
SPA3217_YP_152353.1_-_3324539-3325270	0.0524015	YES
SPA0776_YP_150081.1_+_866405-867718	0.0495635	YES
SPA0096_YP_149441.1_-_109221-109880	0.0484754	YES
SPA1082_YP_150364.1_-_1151818-1152666	0.0457176	YES
SPA3613_YP_152723.1_-_3749686-3752412	0.0455266	YES
SPA3356_YP_152482.1_-_3450925-3451464	0.0428261	YES
SPA0324_YP_149655.1_+_365174-365560	0.042044	YES
SPA0265_YP_149600.1_-_301142-302497	0.0411374	YES
SPA0141_YP_149486.1_+_164555-165496	0.0395123	YES
SPA2734_YP_151903.1_+_2834402-2836063	0.0386952	YES
SPA3460_YP_152583.1_-_3570658-3572247	0.0332836	YES
SPA2558_YP_151737.1_-_2664540-2667320	0.0328845	YES
SPA3120_YP_152261.1_-_3230583-3231530	0.0322296	YES
SPA3997_YP_153061.1_-_4150458-4151228	0.0317865	YES
SPA3189_YP_152326.1_+_3293738-3294229	0.0305207	YES
SPA3465_YP_152587.1_+_3576475-3577797	0.0280612	YES
SPA1616_YP_150855.1_+_1676798-1677904	0.0276588	YES
SPA2931_YP_152082.1_+_3039970-3040518	0.0266104	YES
SPA2977_YP_152127.1_-_3082132-3084258	0.0266091	YES
SPA0936_YP_150224.1_-_1009738-1010241	0.0265644	YES
SPA1016_YP_150300.1_-_1087524-1088000	0.0254146	YES
SPA4320_YP_153359.1_-_4495028-4496653	0.0250021	YES
SPA2411_YP_151604.1_-_2515086-2515985	0.0241624	YES
SPA3039_YP_152187.1_-_3142511-3143494	0.022031	YES
SPA4362_YP_153400.1_+_4539423-4540046	0.0194059	YES
SPA0900_YP_150192.1_-_979736-980731	0.0184048	YES
SPA4361_YP_153399.1_+_4538686-4539411	0.0167126	YES
SPA1443_YP_150694.1_-_1520706-1521254	0.015497	YES
SPA1194_YP_150463.1_+_1264357-1265025	0.0149773	YES
SPA2090_YP_151296.1_-_2175593-2176687	0.0108293	YES
SPA3548_YP_152661.1_-_3678078-3679133	0.0104558	YES
SPA1154_YP_150427.1_-_1222230-1223792	0.00933204	YES
SPA0814_YP_150116.1_-_912981-914195	0.00775322	YES
SPA3978_YP_153046.1_-_4132323-4133273	0.00592519	YES
SPA3969_YP_153043.1_+_4123649-4124500	0.00467205	YES
SPA1275_YP_150536.1_-_1349141-1350340	0.00267728	YES
SPA2679_YP_151852.1_-_2784817-2785383	0.00130561	YES
SPA1982_YP_151202.1_-_2064575-2065654	0.0011439	YES
SPA3549_YP_152662.1_+_3679401-3680597	0.000858708	YES

## Sheet: CT_02021853
Protein	Score	T3S protein or Not
SeD_A0894_YP_002214764.1_+_891125-893392	1.81737	YES
SeD_A0310_YP_002214241.1_+_329155-331344	1.36924	YES
SeD_A1457_YP_002215283.1_+_1414970-1415692	1.26293	YES
SeD_A1710_YP_002215516.1_-_1646088-1647314	1.21311	YES
SeD_A3192_YP_002216853.1_-_3069076-3071088	1.20836	YES
SeD_A2196_YP_002215961.1_-_2107217-2107915	1.1466	YES
SeD_A1939_YP_002215727.1_-_1869291-1870073	1.09772	YES
SeD_A2040_YP_002215820.1_-_1970367-1971710	1.0543	YES
SeD_A2143_YP_002215912.1_+_2056147-2057157	1.04993	YES
SeD_A1284_YP_002215127.1_-_1268293-1269699	0.953284	YES
SeD_A2259_YP_002216021.1_-_2158671-2160167	0.937268	YES
SeD_A2839_YP_002216540.1_+_2708062-2709012	0.926096	YES
SeD_A0256_YP_002214195.1_+_276860-279001	0.914826	YES
SeD_A1978_YP_002215761.1_-_1908453-1911509	0.892566	YES
SeD_A1167_YP_002215023.1_-_1156728-1158413	0.826378	YES
SeD_A3036_YP_002216712.1_-_2933748-2934107	0.797041	YES
SeD_A1146_YP_002215004.1_-_1140853-1141362	0.790401	YES
SeD_A2722_YP_002216444.1_+_2604758-2605759	0.787385	YES
SeD_A2402_YP_002216151.1_+_2271991-2274339	0.785188	YES
SeD_A1931_YP_002215720.1_-_1864803-1865795	0.755544	YES
SeD_A1504_YP_002215327.1_+_1455605-1456039	0.751008	YES
SeD_A3207_YP_002216866.1_-_3084879-3085997	0.740644	YES
SeD_A2422_YP_002216170.1_-_2292877-2294310	0.705541	YES
SeD_A1228_YP_002215080.1_-_1223324-1223740	0.700594	YES
SeD_A2582_YP_002216313.1_-_2462025-2464391	0.693706	YES
SeD_A0422_YP_002214338.1_+_441437-442549	0.693152	YES
SeD_A1943_YP_002215731.1_-_1871597-1873051	0.680679	YES
SeD_A1285_YP_002215129.1_+_1269955-1271472	0.657172	YES
SeD_A1126_YP_002214985.1_+_1118443-1119411	0.656367	YES
SeD_A2550_YP_002216283.1_-_2431073-2431936	0.618279	YES
SeD_A0032_YP_002213984.1_+_33365-34369	0.606078	YES
SeD_A2789_YP_002216493.1_-_2663014-2663940	0.598964	YES
SeD_A2974_YP_002216661.1_-_2864955-2865338	0.59837	YES
SeD_A2026_YP_002215806.1_+_1958261-1960513	0.592973	YES
SeD_A2269_YP_002216029.1_-_2164192-2165433	0.586322	YES
SeD_A0490_YP_002214402.1_+_506415-507146	0.580416	YES
SeD_A2957_YP_002216646.1_-_2850726-2851454	0.579098	YES
SeD_A2384_YP_002216133.1_+_2254857-2255348	0.575174	YES
SeD_A1105_YP_002214964.1_+_1102789-1103820	0.570929	YES
SeD_A1945_YP_002215733.1_-_1873524-1874114	0.564685	YES
SeD_A1938_YP_002215726.1_-_1868605-1869294	0.538609	YES
SeD_A1740_YP_002215545.1_-_1675410-1676360	0.534328	YES
SeD_A0620_YP_002214523.1_-_626465-627388	0.519499	YES
SeD_A2386_YP_002216135.1_+_2255637-2256647	0.499341	YES
SeD_A3100_YP_002216770.1_+_2991012-2991539	0.483723	YES
SeD_A1998_YP_002215779.1_+_1931194-1932240	0.483086	YES
SeD_A4926_YP_002218393.1_+_4759782-4761152	0.476669	YES
SeD_A1886_YP_002215679.1_+_1826472-1827530	0.475388	YES
SeD_A2273_YP_002216033.1_-_2167978-2168328	0.473417	YES
SeD_A2509_YP_002216247.1_-_2388506-2389453	0.470479	YES
SeD_A0028_YP_002213982.1_+_30576-31211	0.465741	YES
SeD_A1429_YP_002215262.1_-_1396231-1396953	0.46423	YES
SeD_A0031_YP_002213983.1_-_32546-32995	0.4497	YES
SeD_A1356_YP_002215194.1_-_1331174-1331980	0.441256	YES
SeD_A3195_YP_002216854.1_-_3073511-3075292	0.440554	YES
SeD_A3348_YP_002216991.1_-_3223549-3224967	0.438599	YES
SeD_A3441_YP_002217073.1_-_3306187-3306873	0.43648	YES
SeD_A2852_YP_002216553.1_-_2726642-2727505	0.431794	YES
SeD_A2955_YP_002216644.1_-_2849603-2849983	0.428021	YES
SeD_A1266_YP_002215110.1_-_1254580-1255584	0.416743	YES
SeD_A0311_YP_002214242.1_+_331368-331814	0.40776	YES
SeD_A1091_YP_002214950.1_+_1091063-1091665	0.400556	YES
SeD_A3178_YP_002216839.1_-_3057730-3058092	0.398305	YES
SeD_A2833_YP_002216534.1_-_2701787-2702803	0.39042	YES
SeD_A2993_YP_002216675.1_+_2886616-2886954	0.380982	YES
SeD_A3280_YP_002216934.1_-_3158289-3159629	0.377649	YES
SeD_A4237_YP_002217795.1_+_4085078-4085833	0.376477	YES
SeD_A1970_YP_002215755.1_-_1901825-1903096	0.373222	YES
SeD_A2188_YP_002215953.1_-_2098901-2099854	0.372257	YES
SeD_A0033_YP_002213985.1_-_34377-34817	0.368047	YES
SeD_A3844_YP_002217437.1_+_3666853-3667179	0.365481	YES
SeD_A2200_YP_002215965.1_+_2109659-2109952	0.364007	YES
SeD_A1766_YP_002215571.1_-_1707935-1709335	0.363264	YES
SeD_A0006_YP_002213960.1_-_5966-7423	0.362346	YES
SeD_A3508_YP_002217137.1_-_3367060-3367794	0.361323	YES
SeD_A2586_YP_002216314.1_+_2465981-2466358	0.35479	YES
SeD_A3617_YP_002217236.1_+_3472596-3473369	0.352282	YES
SeD_A0020_YP_002213974.1_+_20060-23056	0.349187	YES
SeD_A3291_YP_002216942.1_+_3166591-3167955	0.346385	YES
SeD_A1110_YP_002214969.1_+_1106163-1107557	0.34152	YES
SeD_A2478_YP_002216219.1_+_2357151-2358353	0.337303	YES
SeD_A2973_YP_002216660.1_+_2864306-2864893	0.32882	YES
SeD_A4516_YP_002218040.1_-_4355564-4358053	0.328621	YES
SeD_A2161_YP_002215930.1_-_2074404-2075228	0.327273	YES
SeD_A4182_YP_002217741.1_-_4026618-4027538	0.325053	YES
SeD_A1202_YP_002215056.1_-_1193775-1194656	0.324776	YES
SeD_A3038_YP_002216714.1_+_2934778-2935644	0.323471	YES
SeD_A4590_YP_002218093.1_-_4430295-4430732	0.319194	YES
SeD_A3573_YP_002217197.1_-_3429805-3431325	0.31844	YES
SeD_A1431_YP_002215263.1_-_1397433-1398233	0.317934	YES
SeD_A4995_YP_002218454.1_+_4826517-4826843	0.313828	YES
SeD_A0579_YP_002214486.1_+_597744-598532	0.313434	YES
SeD_A2863_YP_002216564.1_+_2738411-2738770	0.312944	YES
SeD_A2410_YP_002216158.1_+_2281061-2282365	0.299644	YES
SeD_A1007_YP_002214867.1_-_998926-999876	0.297961	YES
SeD_A1780_YP_002215583.1_+_1723857-1724288	0.294813	YES
SeD_A2231_YP_002215996.1_+_2136619-2137269	0.294058	YES
SeD_A0510_YP_002214420.1_-_527272-527661	0.292659	YES
SeD_A4774_YP_002218260.1_+_4632130-4633752	0.291752	YES
SeD_A0979_YP_002214839.1_+_969917-970639	0.29046	YES
SeD_A3880_YP_002217470.1_+_3708652-3709335	0.289405	YES
SeD_A1991_YP_002215773.1_+_1923150-1924085	0.284103	YES
SeD_A3096_YP_002216766.1_+_2989114-2989791	0.282119	YES
SeD_A0771_YP_002214654.1_-_767574-769163	0.281077	YES
SeD_A1282_YP_002215126.1_-_1267871-1268278	0.277921	YES
SeD_A0177_YP_002214118.1_+_188800-190071	0.276678	YES
SeD_A4524_YP_002218048.1_-_4366326-4368977	0.270991	YES
SeD_A4087_YP_002217663.1_-_3935935-3936402	0.269624	YES
SeD_A2417_YP_002216165.1_-_2287276-2288259	0.255113	YES
SeD_A1940_YP_002215728.1_-_1870089-1870517	0.252365	YES
SeD_A1036_YP_002214895.1_+_1034034-1034993	0.251343	YES
SeD_A3557_YP_002217182.1_-_3411090-3413933	0.249045	YES
SeD_A1803_YP_002215606.1_+_1749292-1750353	0.243746	YES
SeD_A4729_YP_002218221.1_-_4589915-4590772	0.242809	YES
SeD_A4043_YP_002217619.1_-_3885161-3886615	0.241445	YES
SeD_A0873_YP_002214743.1_-_867080-868555	0.240779	YES
SeD_A2633_YP_002216357.1_-_2517192-2517995	0.23859	YES
SeD_A4325_YP_002217869.1_-_4171729-4172898	0.238521	YES
SeD_A4837_YP_002218319.1_-_4690803-4691750	0.236789	YES
SeD_A1198_YP_002215054.1_-_1186097-1190059	0.22653	YES
SeD_A0007_YP_002213961.1_+_7665-8618	0.226451	YES
SeD_A4863_YP_002218341.1_-_4712894-4714405	0.225787	YES
SeD_A3780_YP_002217377.1_-_3623676-3624059	0.223626	YES
SeD_A1101_YP_002214960.1_+_1098026-1099456	0.220373	YES
SeD_A4185_YP_002217744.1_-_4028944-4030632	0.220122	YES
SeD_A3665_YP_002217277.1_+_3515383-3515670	0.219413	YES
SeD_A1956_YP_002215742.1_-_1884884-1886632	0.218801	YES
SeD_A4663_YP_002218162.1_+_4521606-4522955	0.216452	YES
SeD_A0871_YP_002214741.1_-_864762-865778	0.212081	YES
SeD_A0758_YP_002214642.1_-_754480-755475	0.209733	YES
SeD_A1769_YP_002215574.1_-_1711746-1712186	0.206698	YES
SeD_A0094_YP_002214042.1_-_98162-98983	0.204148	YES
SeD_A2350_YP_002216100.1_-_2226719-2227648	0.202807	YES
SeD_A1416_YP_002215252.1_+_1382489-1385575	0.201702	YES
SeD_A1650_YP_002215462.1_-_1592515-1593021	0.199781	YES
SeD_A1597_YP_002215411.1_-_1540796-1541674	0.196831	YES
SeD_A1969_YP_002215754.1_-_1900608-1901828	0.195037	YES
SeD_A0573_YP_002214480.1_+_590132-591280	0.194146	YES
SeD_A0018_YP_002213972.1_-_17045-17488	0.193835	YES
SeD_A0205_YP_002214146.1_+_215961-218435	0.192638	YES
SeD_A3995_YP_002217579.1_-_3840617-3843241	0.190798	YES
SeD_A4593_YP_002218096.1_+_4433720-4435024	0.190089	YES
SeD_A0597_YP_002214502.1_+_613108-613626	0.187824	YES
SeD_A3234_YP_002216891.1_-_3111039-3112172	0.187594	YES
SeD_A0933_YP_002214800.1_+_926388-926861	0.185849	YES
SeD_A2877_YP_002216577.1_+_2755166-2756515	0.185233	YES
SeD_A4512_YP_002218036.1_+_4350656-4352836	0.183406	YES
SeD_A2286_YP_002216046.1_-_2176860-2178002	0.181262	YES
SeD_A0262_YP_002214201.1_+_282072-282494	0.179106	YES
SeD_A1591_YP_002215405.1_+_1536619-1537347	0.178822	YES
SeD_A2659_YP_002216383.1_-_2542837-2544618	0.175791	YES
SeD_A3300_YP_002216951.1_+_3174619-3175935	0.171077	YES
SeD_A4192_YP_002217751.1_-_4039411-4039773	0.169722	YES
SeD_A0153_YP_002214094.1_+_161332-162375	0.168961	YES
SeD_A3373_YP_002217015.1_-_3244663-3245415	0.168755	YES
SeD_A0878_YP_002214748.1_+_871321-872379	0.163679	YES
SeD_A0401_YP_002214320.1_+_422287-423456	0.157868	YES
SeD_A1094_YP_002214953.1_+_1092618-1093415	0.157812	YES
SeD_A2962_YP_002216650.1_-_2854313-2856112	0.155895	YES
SeD_A2178_YP_002215947.1_+_2090816-2091220	0.154778	YES
SeD_A0572_YP_002214479.1_+_588811-590109	0.152931	YES
SeD_A0961_YP_002214824.1_+_954457-956142	0.150168	YES
SeD_A4188_YP_002217747.1_-_4034976-4035914	0.147001	YES
SeD_A3216_YP_002216874.1_-_3092958-3093626	0.139415	YES
SeD_A4155_YP_002217718.1_-_4000354-4003080	0.127714	YES
SeD_A5016_YP_003495236.1_+_4731398-4731850	0.126045	YES
SeD_A4844_YP_002218325.1_-_4697579-4698067	0.12591	YES
SeD_A4297_YP_002217846.1_+_4144574-4144915	0.124629	YES
SeD_A2935_YP_002216626.1_+_2827491-2829635	0.12338	YES
SeD_A3177_YP_002216838.1_-_3056498-3057385	0.122483	YES
SeD_A1160_YP_002215017.1_-_1152747-1153406	0.122161	YES
SeD_A0686_YP_002214584.1_-_688205-688999	0.118573	YES
SeD_A0721_YP_002214610.1_-_721246-722775	0.118348	YES
SeD_A2777_YP_002216485.1_+_2655510-2655857	0.115023	YES
SeD_A4215_YP_002217774.1_-_4058378-4059418	0.11321	YES
SeD_A2276_YP_002216036.1_-_2169792-2170268	0.112605	YES
SeD_A3623_YP_002217242.1_-_3478113-3478748	0.111925	YES
SeD_A2824_YP_002216527.1_-_2692580-2693476	0.11151	YES
SeD_A4615_YP_002218116.1_+_4455620-4457269	0.110694	YES
SeD_A4249_YP_002217805.1_+_4095652-4097442	0.1102	YES
SeD_A3655_YP_002217269.1_-_3507571-3508197	0.108744	YES
SeD_A2670_YP_002216394.1_-_2555804-2557141	0.108607	YES
SeD_A4953_YP_002218416.1_+_4786999-4788057	0.106186	YES
SeD_A0747_YP_002214633.1_+_743179-744273	0.105012	YES
SeD_A3227_YP_002216884.1_-_3105194-3106117	0.104771	YES
SeD_A2246_YP_002216009.1_+_2147528-2148535	0.104496	YES
SeD_A3223_YP_002216881.1_-_3101533-3102483	0.10409	YES
SeD_A2378_YP_002216127.1_+_2250745-2251266	0.103722	YES
SeD_A2389_YP_002216138.1_+_2259159-2260514	0.101782	YES
SeD_A1935_YP_002215723.1_-_1867768-1868031	0.101155	YES
SeD_A2282_YP_002216042.1_-_2174320-2175201	0.10003	YES
SeD_A2278_YP_002216038.1_-_2171282-2172034	0.0942491	YES
SeD_A4866_YP_002218344.1_-_4717177-4718175	0.0941154	YES
SeD_A3026_YP_002216703.1_-_2924442-2924927	0.0922711	YES
SeD_A1688_YP_002215497.1_-_1622958-1626482	0.0875165	YES
SeD_A0454_YP_002214367.1_-_472021-472518	0.0844536	YES
SeD_A0555_YP_002214463.1_+_569872-570558	0.0827929	YES
SeD_A2982_YP_002216669.1_-_2873424-2874725	0.0826854	YES
SeD_A1811_YP_002215613.1_-_1756682-1758070	0.08072	YES
SeD_A1476_YP_002215301.1_+_1430855-1431142	0.0791689	YES
SeD_A1013_YP_002214873.1_+_1004109-1006385	0.0790817	YES
SeD_A2298_YP_002216057.1_+_2184362-2185111	0.0737198	YES
SeD_A4091_YP_002217667.1_+_3939017-3940300	0.0734869	YES
SeD_A0826_YP_002214700.1_+_822908-823312	0.0733284	YES
SeD_A1234_YP_002215086.1_+_1227373-1229487	0.0720982	YES
SeD_A4899_YP_002218368.1_-_4739999-4741624	0.0716403	YES
SeD_A4011_YP_002217593.1_-_3856360-3857685	0.0703265	YES
SeD_A1642_YP_002215454.1_+_1586190-1586858	0.0676042	YES
SeD_A2649_YP_002216373.1_-_2532825-2534192	0.0641451	YES
SeD_A2624_YP_002216349.1_-_2506336-2507553	0.0632603	YES
SeD_A0792_YP_002214668.1_+_784824-786491	0.0623446	YES
SeD_A3428_YP_002217060.1_-_3294154-3294903	0.06231	YES
SeD_A1527_YP_002215349.1_-_1477389-1478237	0.0595479	YES
SeD_A0833_YP_002214707.1_+_832010-832879	0.0592005	YES
SeD_A4993_YP_002218452.1_-_4822646-4824313	0.0590788	YES
SeD_A1034_YP_002214893.1_-_1032661-1033458	0.058362	YES
SeD_A3067_YP_002216742.1_+_2957279-2958082	0.0577323	YES
SeD_A3230_YP_002216887.1_+_3107672-3108265	0.0564137	YES
SeD_A3002_YP_002216684.1_-_2894210-2894977	0.0533698	YES
SeD_A3077_YP_002216751.1_-_2971495-2972595	0.0501482	YES
SeD_A0100_YP_002214048.1_-_104830-105489	0.0484754	YES
SeD_A3860_YP_002217451.1_-_3685154-3685693	0.0428261	YES
SeD_A3607_YP_002217227.1_-_3462937-3463827	0.0423013	YES
SeD_A2916_YP_002216607.1_-_2808729-2809115	0.042044	YES
SeD_A2980_YP_002216667.1_+_2871704-2873059	0.0411374	YES
SeD_A3979_YP_002217564.1_-_3817011-3818600	0.0332836	YES
SeD_A4419_YP_002217950.1_-_4266599-4267027	0.0311283	YES
SeD_A1605_YP_002215419.1_-_1548495-1550057	0.030872	YES
SeD_A3681_YP_002217293.1_+_3527105-3527596	0.0305207	YES
SeD_A3984_YP_002217569.1_+_3822827-3824149	0.0280612	YES
SeD_A3186_YP_002216847.1_+_3064247-3065914	0.0278223	YES
SeD_A2132_YP_002215901.1_+_2044306-2045412	0.0276588	YES
SeD_A1490_YP_002215314.1_-_1442964-1444328	0.0266045	YES
SeD_A1313_YP_002215151.1_-_1290678-1291181	0.0265644	YES
SeD_A2636_YP_002216360.1_-_2520585-2521367	0.0252388	YES
SeD_A3320_YP_002216966.1_-_3193855-3197400	0.0246145	YES
SeD_A1223_YP_002215075.1_-_1217239-1218570	0.0236279	YES
SeD_A0360_YP_002214282.1_+_374799-376031	0.0190484	YES
SeD_A1272_YP_002215116.1_-_1259910-1260905	0.0184048	YES
SeD_A2393_YP_002216142.1_+_2261863-2263077	0.0167627	YES
SeD_A1454_YP_002215281.1_-_1413087-1413563	0.0137553	YES
SeD_A1520_YP_002215342.1_-_1469705-1470439	0.0131165	YES
SeD_A1003_YP_002214863.1_-_993394-994365	0.0122776	YES
SeD_A4082_YP_002217658.1_-_3930031-3931086	0.0104558	YES
SeD_A4547_YP_002218062.1_-_4389577-4390527	0.00592519	YES
SeD_A3243_YP_002216899.1_-_3116840-3117445	0.00572963	YES
SeD_A1957_YP_002215743.1_+_1886844-1887578	0.00233618	YES
SeD_A0996_YP_002214856.1_-_986134-986649	0.00178038	YES
SeD_A3129_YP_002216796.1_-_3013651-3014217	0.00130561	YES
SeD_A4083_YP_002217659.1_+_3931354-3932550	0.000858708	YES

[truncated: 10 more sheets: CVM19633, NCTC_12419, P125109, RKS4594, RSK2980, SC-B67, SL254, SL476, SL483, SPB7]
